# Supplementary material for: Conformational cooperativity between helical domains of differing geometry in oligoamide–oligourea foldamer chimeras
Source: Royal Society of Chemistry journal article supplement (doi:10.1039/c5cc02995c), 2015-01-01

## Conformational cooperativity between helical domains of differing geometry in oligoamide-oligourea foldamer chimeras

Julien Maury, Bryden A. F. Le Bailly, James Raftery and Jonathan Clayden\*

### SUPPORTING INFORMATION

|                                                                 |         |
|-----------------------------------------------------------------|---------|
| General Information .....                                       | S2      |
| General Procedures.....                                         | S3      |
| Experimental Procedures and Characterisation Data .....         | S5-34   |
| Hydrogen Bonding of <b>2d</b> , <b>7e</b> and <b>8c</b> .....   | S35     |
| CD spectra .....                                                | S36-38  |
| VT-NMR <sup>13</sup> C of <b>11</b> between -80 and 40°C .....  | S39-40  |
| VT-NMR <sup>1</sup> H of <b>11</b> between 5 and 38 °C .....    | S40     |
| NMR Spectra ( <sup>1</sup> H, <sup>13</sup> C, COSY, HSQC)..... | S41-108 |

## General Information

All solvents were purchased from Sigma-Aldrich and used without purification except THF and CH<sub>2</sub>Cl<sub>2</sub> which were obtained by distillation from sodium/benzophenone and calcium hydride respectively.

<sup>1</sup>H NMR and <sup>13</sup>C NMR spectra were recorded on a Bruker Ultrashield 400 or 500 MHz spectrometer. <sup>1</sup>H and <sup>13</sup>C spectra were referenced relative to the solvent residual peaks and chemical shifts (δ) reported in ppm downfield of tetramethylsilane (CDCl<sub>3</sub> δ H: 7.26 ppm, δ C: 77.16 ppm; CD<sub>3</sub>OD δ H: 3.31 ppm, δ C: 49.00 ppm). <sup>1</sup>H NMR splitting patterns with observed first-order coupling are designated as singlet (s), doublet (d), triplet (t), or quartet (q). Coupling constants (*J*) are reported in hertz (Hz). In <sup>1</sup>H NMR spectra, amide NH signals that exchange with deuterated solvent are not reported.

Electrospray (ES) spectra were recorded on a Waters Platform II and high resolution mass spectra (HRMS) were recorded on a Thermo Finnigan MAT95XP and are accurate to ± 0.001 Da. Infrared spectra were recorded on a Thermo Scientific Nicolet iS5 FTIR spectrometer. Melting points were determined on a Gallenkamp apparatus and are uncorrected.

Thin layer chromatography (TLC) was performed using commercially available pre-coated plates (Macherey-Nagel alugram. Sil G/UV254) and visualized under UV light at 254 nm and/or by staining with phosphomolybdic acid solution. Flash column chromatography was carried out on Fluorochem Davisil 40-63 μm 60 Å silica with the eluent quoted. Optical rotation measurements were taken on an AA-100 polarimeter using a cell with a path length of 0.25 dm at 24 °C with the solvent and concentration (g/100 mL) stated. Circular dichroism (CD) spectra were recorded on a Jasco J-815 spectrometer using a 1 mm cell at 20 °C with the solvent and concentration stated.

## General Procedures

Activated chiral monomers **C** (**a** R = *i*Bu; **b** R = Me; **c** R = *i*Pr), activated achiral monomers **M1** and **M2**, CbzGly-Aib<sub>4</sub>-OtBu and GlyNH<sub>2</sub>-Aib<sub>4</sub>-NHBoc and azlactone **A1**, L-ValNH<sup>t</sup>Bu and H-PheNH<sup>t</sup>Bu were prepared using a previously described procedure.<sup>1</sup>

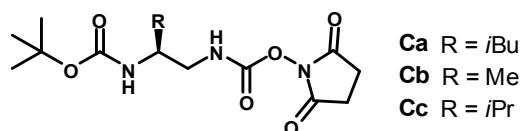

**Scheme 1:** Activated chiral monomers **Ca**, **Cb** and **Cc**

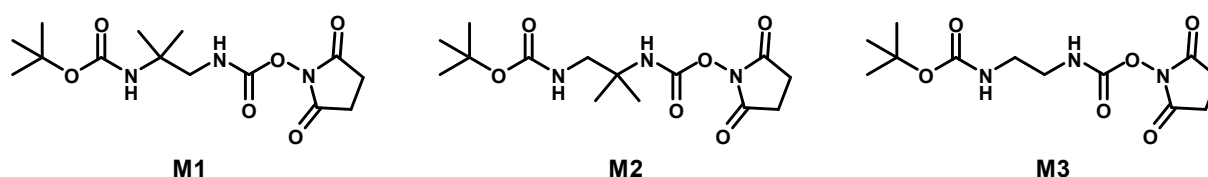

**Scheme 2:** Activated achiral monomers **M1**, **M2** and **M3**

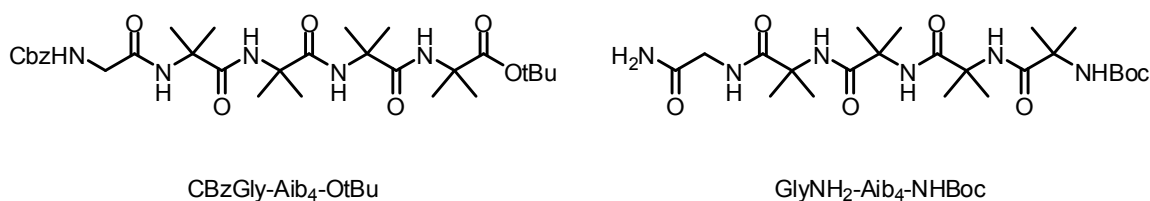

**Scheme 3:** Peptides CbzGly-Aib<sub>4</sub>-OtBu and GlyNH<sub>2</sub>-Aib<sub>4</sub>-NHBoc

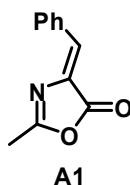

**Scheme 4:** Azlactone **A1**

**General Procedure A :** CbzGly-Aib<sub>4</sub>-OH (1.00 eq.) and 1-hydroxybenzotriazole hydrate (1.30 eq.) were dissolved in CH<sub>2</sub>Cl<sub>2</sub> (60 mL/mmol) and the suspension cooled to 0 °C. *N*-(3-Dimethylaminopropyl)-*N*-ethylcarbodiimide (1.1 eq.) was added and the reaction was allowed to warm to room temperature

<sup>1</sup> Activated chiral and achiral monomers: (a) G. Guichard, V. Semetey, C. Didierjean, A. Aubry, J. - P. Briand, M. Rodriguez, *J. Org. Chem.*, 1999, **64**, 8702; (b) J. Fremaux, C. Dolain, B. Kauffmann, J. Clayden and G. Guichard, *Chem. Commun.*, 2013, **49**, 7415. (c) J. Fremaux, L. Fischer, T. Arbogast, B. Kauffmann and G. Guichard, *Angew. Chem. Int. Ed.*, 2011, **50**, 1382. Peptides: J. Solà, M. Helliwell and J. Clayden, *J. Am. Chem. Soc.*, 2010, **132**, 4548. M. De Poli, L. Byrne, R. A. Brown, J. Solà, A. Castellanos, T. Boddaert, R. Wechsel, J. D. Beadle and J. Clayden, *J. Org. Chem.*, 2014, **79**, 4659. Azlactone: B. S. Jursic, S. Sagiraju, D. K. Ancalade, T. Clark and E. D. Stevens, *Synth. Commun.*, 2007, **37**, 1709. Synthesis of L-ValNH<sup>t</sup>Bu and H-PheNH<sup>t</sup>Bu: B. A. F. Le Bailly and J. Clayden, *Chem. Commun.*, 2014, **50**, 7949.

and stirred until it was homogenous. The amine<sup>2</sup> (1.5 or 2.5 eq.) and trimethylamine or DIPEA (1.5 or 2 eq.) were added and the reaction mixture was stirred for 72 hours. The solvent was removed *in vacuo* and EtOAc was added. The organic phase was washed with KHSO<sub>4</sub> (5%), NaHCO<sub>3</sub>, brine, dried (MgSO<sub>4</sub>), filtered and concentrated. The pure oligomer was isolated by column chromatography (CH<sub>2</sub>Cl<sub>2</sub>:MeOH, 90:10).

**General Procedure B :** Boc-protected oligomers (1.00 eq) were dissolved in a mixture CH<sub>2</sub>Cl<sub>2</sub>/TFA (3/1) and stirred for 2 hours. The reaction mixture was then concentrated under reduced pressure and the resulting residue was coevaporated 3 times with cyclohexane. The crude product was then dissolved in DMF. DIPEA (3.00 eq) was then added and the mixture was cooled to 0 °C prior to the dropwise addition of carbamate (1.00 eq) in DMF (0.3 M). The reaction mixture was left to stir at 0 °C for 30 minutes then was allowed to warm to room temperature and stirred for another 18 hours. The reaction mixture was then concentrated and purified by flash chromatography (CH<sub>2</sub>Cl<sub>2</sub>-MeOH, 90:10) to give the desired compound (If DIPEA remained after column chromatography, the mixture was dissolved in EtOH. CuSO<sub>4</sub>.5H<sub>2</sub>O was added and the reaction mixture was stirred for 3 hours. A filtration (CH<sub>2</sub>Cl<sub>2</sub>/MeOH, 90:10) over a short pad of silica gel gave the desired compound).

**General Procedure C :** The Boc-protected oligomer (1.00 eq) was dissolved in a mixture CH<sub>2</sub>Cl<sub>2</sub>/TFA (3/1) and stirred for 2 hours. The reaction mixture was then concentrated under reduced pressure and the resulting residue was coevaporated 3 times with cyclohexane. The crude product was then dissolved in DMF. DIPEA (3.00 eq) was then added and the mixture was cooled to 0 °C prior to the dropwise addition of Isopropyl isocyanate (2.00 eq) dissolved in DMF. The reaction mixture was left to stir at 0 °C for 30 minutes, then was allowed to warm to room temperature and stirred for another 18 hours. The reaction mixture was then concentrated and purified by flash chromatography (CH<sub>2</sub>Cl<sub>2</sub>-MeOH, 90:10) to give the desired compound (If DIPEA remained after column chromatography, the mixture was dissolved in EtOH. CuSO<sub>4</sub>.5H<sub>2</sub>O was added and the reaction mixture was stirred for 3 hours. A filtration (CH<sub>2</sub>Cl<sub>2</sub>/MeOH, 90:10) over a short pad of silica gel gave the desired compound).

**General Procedure D :** Boc-protected oligourea (1.00 eq) and DiPEA (1.00 eq) were added to a solution of isopropyl amine (1.30 eq) in DMF (0.26 M) . The reaction was stirred for 30 min, quenched with NaHCO<sub>3</sub> aqueous solution and EtOAc was added. The organic phase was washed with KHSO<sub>4</sub> (5%), NaHCO<sub>3</sub> (sat?), brine, dried (MgSO<sub>4</sub>), filtered and concentrated.

---

<sup>2</sup> From deprotection of Boc protected amine [CH<sub>2</sub>Cl<sub>2</sub>/TFA (3/1), 2h, r.t.]



## Experimental Procedures and Characterisation Data

### BocVal<sup>u</sup>-NH(CO)NH*i*Pr **U1**

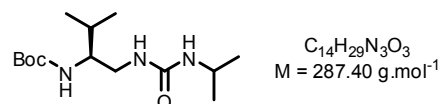

**U1** was prepared from **Cc** (1.00 g, 2.91 mmol), isopropylamine (310  $\mu$ L, 3.78 mmol) and DIPEA (537  $\mu$ L, 2.91 mmol) as described in the general procedure D. The pure oligomer **U1** (794 mg, 95%) was isolated as a white solid.  $^1\text{H NMR}$  (400 MHz,  $\text{CDCl}_3$ )  $\delta = 5.00\text{-}4.80$  (1H, m, NH), 4.79-4.64 (1H, m, NH), 4.54-4.35 (1H, m, NH), 3.81 (1H, oct,  $J = 6.9$ ,  $\text{NCH}_{iPr}$ ), 3.51-3.38 (1H, m,  $\text{NCH}_{Val}$ ), 3.36-3.23 (1H, m,  $\text{NCH}_A\text{H}_{BVal}$ ), 3.22-3.12 (1H, m,  $\text{NCH}_A\text{H}_{BVal}$ ), 1.85-1.68 (1H, m,  $\text{CH}_{Val}$ ), 1.43 (9H, s,  $\text{C}(\text{CH}_3)_3$ ), 1.13 (6H, d,  $J = 6.5$ , 2 x  $\text{CH}_{3iPr}$ ), 0.94 (3H, d,  $J = 6.8$ ,  $\text{CH}_{3Val}$ ), 0.92 (3H, d,  $J = 6.9$ ,  $\text{CH}_{3Val}$ ).  $^{13}\text{C NMR}$  (100 MHz,  $\text{CDCl}_3$ )  $\delta = 158.2$  (C=O), 157.3 (C=O), 79.6 ( $\text{C}(\text{CH}_3)_3$ ), 56.6 ( $\text{NC}_{\beta}\text{H}_{Val}$ ), 43.4 ( $\text{NCH}_{iPr}$ ), 42.5 ( $\text{NC}_{\alpha}\text{H}_{2Val}$ ), 30.7 ( $\text{C}_{\gamma}\text{H}_{Val}$ ), 28.5 ( $\text{C}(\text{CH}_3)_3$ ), 23.6 ( $\text{CH}_{iPr}$ ), 23.5 ( $\text{CH}_{iPr}$ ), 19.5 ( $\text{C}_{\delta}\text{H}_{3Val}$ ), 18.1 ( $\text{C}_{\delta}\text{H}_{3Val}$ ). IR (film,  $\text{cm}^{-1}$ ):  $\nu_{\text{max}} = 3311, 2965, 2928, 2871, 1636, 1534$ ; HRMS (ESI<sup>+</sup>):  $m/z$  calcd for  $\text{C}_{14}\text{H}_{30}\text{N}_3\text{O}_3$   $[\text{M}+\text{H}]^+$  288.2287, found 288.2285.

### BocAla<sup>u</sup>-NH(CO)NH*i*Pr **U2**<sup>1a</sup>

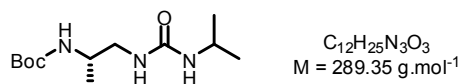

**U2** was prepared from **Cb** (1.50 g, 4.76 mmol), isopropylamine (506  $\mu$ L, 6.18 mmol) and DIPEA (880  $\mu$ L, 4.76 mmol) as described in the general procedure D. The pure oligomer **U2** (1.16 g, 94.0%) was isolated as a white solid.  $^1\text{H NMR}$  (400 MHz,  $\text{CDCl}_3$ )  $\delta = 5.17$  (1H, t,  $J = 4.5$ , NH), 4.94 (1H, d,  $J = 7.5$ , NH), 4.74 (1H, brs, NH), 3.82 (1H, oct,  $J = 6.7$ ,  $\text{NCH}_{Ala}$ ), 3.66 (1H, oct,  $J = 7.3$ ,  $\text{NCH}_{iPr}$ ), 3.32-3.17 (1H, m,  $\text{NCH}_A\text{H}_{BAla}$ ), 3.17-3.03 (1H, m,  $\text{NCH}_A\text{H}_{BAla}$ ), 1.42 (9H, s,  $\text{C}(\text{CH}_3)_3$ ), 1.13 (9H, d,  $J = 6.5$ , 2 x  $\text{CH}_{3iPr}$  and  $\text{CH}_{3Ala}$ ).  $^{13}\text{C NMR}$  (100 MHz,  $\text{CDCl}_3$ )  $\delta = 158.3$  (C=O), 156.5 (C=O), 79.6 ( $\text{C}(\text{CH}_3)_3$ ), 47.6 ( $\text{NC}_{\beta}\text{H}_{Ala}$ ), 46.7 ( $\text{NC}_{\alpha}\text{H}_{2Ala}$ ), 42.4 ( $\text{NCH}_{iPr}$ ), 28.5 ( $\text{C}(\text{CH}_3)_3$ ), 23.6 ( $\text{CH}_{iPr}$ ), 23.5 ( $\text{CH}_{iPr}$ ), 18.8 ( $\text{C}_{\delta}\text{H}_{3Ala}$ ). IR (film,  $\text{cm}^{-1}$ ):  $\nu_{\text{max}} = 3341, 2973, 2932, 2873, 1637, 1563$ ; HRMS (ESI<sup>+</sup>):  $m/z$  calcd for  $\text{C}_{12}\text{H}_{26}\text{N}_3\text{O}_3$   $[\text{M}+\text{H}]^+$  260.1974, found 260.1986.

### BocLeu<sup>u</sup>-NH(CO)NH*i*Pr **U3**

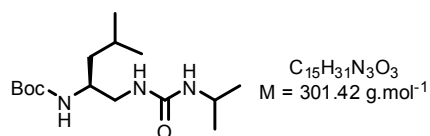

**U3** was prepared from **Ca** (2.00 g, 5.60 mmol), isopropylamine (600  $\mu$ L, 7.27 mmol) and DIPEA (1.03 mL, 5.60 mmol) as described in the general procedure D. The pure oligomer **U3** (1.58 g, 92.7%) was isolated as a white solid.  $^1\text{H NMR}$  (400 MHz,  $\text{CDCl}_3$ )  $\delta = 5.16\text{-}4.94$  (1H, m, NH), 4.81-4.48 (2H, m, NH), 3.90-3.75 (1H, m,  $\text{NCH}_{\text{Leu}}$ ), 3.70-3.59 (1H, m,  $\text{NCH}_{\text{iPr}}$ ), 3.33-3.16 (1H, m,  $\text{NCH}_A\text{H}_{\text{BLeu}}$ ), 3.16-3.02 (1H, m,  $\text{NCH}_A\text{H}_{\text{BLeu}}$ ), 1.67 (1H, non,  $J = 6.9$ ,  $\text{CH}_{\text{Leu}}$ ), 1.42 (9H, s,  $\text{C}(\text{CH}_3)_3$ ), 1.28 (2H, t,  $J = 7.3$ ,  $\text{CH}_{2\text{Leu}}$ ), 1.13 (6H, d,  $J = 6.5$ ,  $\text{CH}_{3\text{iPr}}$ ), 0.91 (3H, d,  $J = 6.5$ ,  $\text{CH}_{3\text{Leu}}$ ), 0.90 (3H, d,  $J = 6.5$ ,  $\text{CH}_{3\text{Leu}}$ ).  $^{13}\text{C NMR}$  (100 MHz,  $\text{CDCl}_3$ )  $\delta = 158.2$  (C=O), 156.9 (C=O), 79.6 ( $\text{C}(\text{CH}_3)_3$ ), 49.8 ( $\text{NC}_{\beta}\text{H}_{\text{Leu}}$ ), 46.2 ( $\text{NC}_{\square}\text{H}_{2\text{Leu}}$ ), 42.4 ( $\text{C}_{\square}\text{H}_{2\text{Leu}}$ ), 42.2 ( $\text{NCH}_{\text{iPr}}$ ), 28.5 ( $\text{C}(\text{CH}_3)_3$ ), 25.0 ( $\text{C}_{\delta}\text{H}_{\text{Leu}}$ ), 23.6 ( $\text{CH}_{\text{iPr}}$ ), 23.5 ( $\text{CH}_{\text{iPr}}$ ), 23.2 ( $\text{C}_\gamma\text{H}_{3\text{Leu}}$ ), 22.2 ( $\text{C}_\delta\text{H}_{3\text{Leu}}$ ). IR (film,  $\text{cm}^{-1}$ ):  $\nu_{\text{max}} = 3341, 2964, 2931, 2870, 1636, 1526$ ;

### BocVal<sup>u</sup>-Ala<sup>u</sup>-NH(CO)NH*i*Pr **U4**

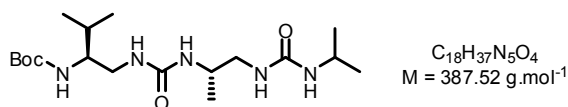

**U4** was prepared from **U2** (900 mg, 3.86 mmol), **Cc** (1.33 g, 3.86 mmol) and DIPEA (1.97 mL, 11.58 mmol) as described in the general procedure B2. The pure oligomer **U4** (933 mg, 62.4% in two steps) was isolated as a white solid.  $^1\text{H NMR}$  (400 MHz,  $\text{CD}_3\text{OH}$ )  $\delta = 6.39$  (1H, d,  $J = 6.7$ , NH), 6.04-5.73 (4H, m, NH), 4.88-3.67 (2H, m,  $\text{NCH}_{\text{Ala}}$  and  $\text{NCH}_{\text{iPr}}$ ), 3.52-3.38 (1H, m,  $\text{NCH}_{\text{Val}}$ ), 3.37-3.15 (2H, m,  $\text{NCH}_A\text{H}_{\text{BVal}}$  and  $\text{NCH}_A\text{H}_{\text{BAla}}$ ), 3.01-2.82 (2H, m,  $\text{NCH}_A\text{H}_{\text{BVal}}$  and  $\text{NCH}_A\text{H}_{\text{BAla}}$ ), 1.70 (1H, oct,  $J = 6.6$ ,  $\text{CH}_{\text{Val}}$ ), 1.43 (9H, s,  $\text{C}(\text{CH}_3)_3$ ), 1.11 (3H, d,  $J = 6.5$ ,  $\text{CH}_{3\text{iPr}}$ ), 1.10 (3H, d,  $J = 6.5$ ,  $\text{CH}_{3\text{iPr}}$ ), 1.07 (3H, d,  $J = 6.7$ ,  $\text{CH}_{3\text{Ala}}$ ), 0.93 (3H, d,  $J = 6.8$ ,  $\text{CH}_{3\text{Val}}$ ), 0.89 (3H, d,  $J = 6.8$ ,  $\text{CH}_{3\text{Val}}$ ).  $^{13}\text{C NMR}$  (100 MHz,  $\text{CD}_3\text{OH}$ )  $\delta = 160.8$  (C=O), 160.6 (C=O), 158.8 (C=O), 79.8 ( $\text{C}(\text{CH}_3)_3$ ), 57.6 ( $\text{NC}_{\beta}\text{H}_{\text{Val}}$ ), 47.6 ( $\text{NC}_{\beta}\text{H}_{\text{Ala}}$ ), 46.9 ( $\text{NC}_{\square}\text{H}_{2\text{Ala}}$ ), 43.2 ( $\text{NC}_{\square}\text{H}_{2\text{Val}}$ ), 42.9 ( $\text{NCH}_{\text{iPr}}$ ), 31.7 ( $\text{C}_{\gamma}\text{H}_{\text{Val}}$ ), 28.7 ( $\text{C}(\text{CH}_3)_3$ ), 23.5 ( $\text{CH}_{\text{iPr}}$ ), 23.4 ( $\text{CH}_{\text{iPr}}$ ), 19.8 ( $\text{C}_{\delta}\text{H}_{3\text{Val}}$ ), 19.0 ( $\text{C}_{\delta}\text{H}_{3\text{Ala}}$ ), 18.3 ( $\text{C}_{\delta}\text{H}_{3\text{Val}}$ ). IR (film,  $\text{cm}^{-1}$ ):  $\nu_{\text{max}} = 3321, 2969, 2932, 2873, 1630, 1529$ ; HRMS (ESI<sup>+</sup>):  $m/z$  calcd for  $\text{C}_{18}\text{H}_{38}\text{N}_5\text{O}_4$  [ $\text{M}+\text{H}$ ]<sup>+</sup> 388.2924, found 388.2911.

### BocAla<sup>u</sup>-Leu<sup>u</sup>-NH(CO)NH*i*Pr **U5**

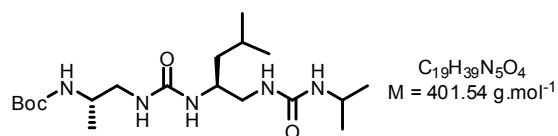

**U5** was prepared from **U3** (1.30 g, 4.98 mmol), **Cb** (1.60 g, 4.98 mmol) and DIPEA (2.54 mL, 14.94 mmol) as described in the general procedure B2. The pure oligomer **U5** (860 mg, 38.4% in two steps) was isolated as a white solid. <sup>1</sup>H NMR (400 MHz, CD<sub>3</sub>OH) δ = 6.61-6.42 (1H, m, NH), 5.91-5.72 (4H, m, NH), 3.85-3.59 (1H, m, NCH<sub>Ala</sub>, NCH<sub>Leu</sub> and NCH<sub>*i*Pr</sub>), 3.28-3.10 (2H, m, NCH<sub>A</sub>H<sub>BLeu</sub> and NCH<sub>A</sub>H<sub>BAla</sub>), 3.02-2.81 (2H, m, NCH<sub>A</sub>H<sub>BLeu</sub> and NCH<sub>A</sub>H<sub>BAla</sub>), 1.68 (1H, non, *J* = 6.9, CH<sub>Leu</sub>), 1.43 (9H, s, C(CH<sub>3</sub>)<sub>3</sub>), 1.32-1.20 (2H, m, CH<sub>2Leu</sub>), 1.11 (3H, d, *J* = 6.5, CH<sub>3*i*Pr</sub>), 1.10 (3H, d, *J* = 6.5, CH<sub>3*i*Pr</sub>), 1.07 (3H, d, *J* = 6.7, CH<sub>3Ala</sub>), 0.92 (3H, d, *J* = 6.7, CH<sub>3Leu</sub>), 0.90 (3H, d, *J* = 6.6, CH<sub>3Leu</sub>). <sup>13</sup>C NMR (100 MHz, CD<sub>3</sub>OH) δ = 161.1 (C=O), 160.6 (C=O), 158.2 (C=O), 79.9 (C(CH<sub>3</sub>)<sub>3</sub>), 49.3 (NC<sub>β</sub>H<sub>Leu</sub>), 47.1 (NC<sub>β</sub>H<sub>Ala</sub>), 46.5 (NC<sub>α</sub>H<sub>2Ala</sub>), 46.3 (NC<sub>α</sub>H<sub>2Leu</sub>), 43.1 (C<sub>α</sub>H<sub>2Leu</sub>), 42.9 (NCH<sub>*i*Pr</sub>), 28.7 (C(CH<sub>3</sub>)<sub>3</sub>), 25.9 (C<sub>δ</sub>H<sub>Leu</sub>), 23.6 (CH<sub>*i*Pr</sub>), 23.5 (CH<sub>*i*Pr</sub>), 23.4 (CH<sub>3Leu</sub>), 22.3 (CH<sub>3Leu</sub>), 18.5 (C<sub>δ</sub>H<sub>3Ala</sub>). IR (film, cm<sup>-1</sup>): ν<sub>max</sub> = 3331, 2968, 2932, 2872, 1636, 1536; HRMS (ESI<sup>+</sup>): *m/z* calcd for C<sub>19</sub>H<sub>39</sub>N<sub>5</sub>O<sub>4</sub>Na[M+Na]<sup>+</sup> 424.2900, found 424.2887.

### BocVal<sup>u</sup>-Ala<sup>u</sup>-Leu<sup>u</sup>-NH(CO)NH*i*Pr **U6**

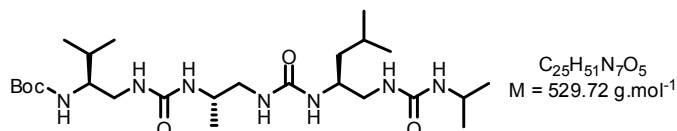

**U6** was prepared from **U5** (850 mg, 2.12 mmol), **Cc** (727 mg, 2.12 mmol) and DIPEA (1.08 mL, 6.35 mmol) as described in the general procedure B2. The pure oligomer **U6** (728 mg, 64.9% in two steps) was isolated as a white solid. <sup>1</sup>H NMR (400 MHz, CD<sub>3</sub>OH) δ = 6.53 (1H, d, *J* = 10.0, NH), 6.25 (1H, dd, *J* = 7.2 and 1.7, NH), 6.05 (1H, d, *J* = 7.9, NH), 5.96-5.86 (2H, m, NH), 5.83 (1H, d, *J* = 9.3, NH), 5.81-5.74 (1H, m, NH), 4.04-3.85 (2H, m, NCH<sub>Ala</sub> and NCH<sub>Leu</sub>), 3.77-3.68 (1H, oct, *J* = 7.6, NCH<sub>*i*Pr</sub>), 3.59-3.39 (4H, m, NCH<sub>Val</sub>, NCH<sub>A</sub>H<sub>BVal</sub>, NCH<sub>A</sub>H<sub>BLeu</sub> and NCH<sub>A</sub>H<sub>BAla</sub>), 2.74-2.34 (3H, m, NCH<sub>A</sub>H<sub>BLeu</sub>, NCH<sub>A</sub>H<sub>BVal</sub> and NCH<sub>A</sub>H<sub>BAla</sub>), 1.76-1.58 (2H, m, CH<sub>Leu</sub> and CH<sub>Val</sub>), 1.45 (9H, s, C(CH<sub>3</sub>)<sub>3</sub>), 1.22 (2H, t, *J* = 7.1, CH<sub>2Leu</sub>), 1.11 (3H, d, *J* = 6.5, CH<sub>3*i*Pr</sub>), 1.10 (3H, d, *J* = 6.5, CH<sub>3*i*Pr</sub>), 1.04 (3H, d, *J* = 6.8, CH<sub>3Ala</sub>), 0.97-0.85 (12H, m, 2 x CH<sub>3Val</sub> and 2 x CH<sub>3Leu</sub>). <sup>13</sup>C NMR (100 MHz, CD<sub>3</sub>OH) δ = 161.2 (C=O), 160.8 (C=O), 160.6 (C=O), 159.4 (C=O), 80.1 (C(CH<sub>3</sub>)<sub>3</sub>), 57.5 (NC<sub>β</sub>H<sub>Val</sub>), 49.1 (NC<sub>β</sub>H<sub>Leu</sub>), 48.1 (NC<sub>α</sub>H<sub>2Ala</sub>), 46.5 (NC<sub>β</sub>H<sub>Ala</sub>), 46.1 (NC<sub>α</sub>H<sub>2Leu</sub>), 43.9 (NC<sub>α</sub>H<sub>2Val</sub>), 43.7 (C<sub>α</sub>H<sub>2Leu</sub>), 42.8 (NCH<sub>*i*Pr</sub>), 31.9 (C<sub>γ</sub>H<sub>Val</sub>), 28.7 (C(CH<sub>3</sub>)<sub>3</sub>), 25.9 (C<sub>δ</sub>H<sub>Leu</sub>), 23.6 (2 x CH<sub>*i*Pr</sub>),

23.5 ( $C_{\delta}H_{3Leu}$ ), 22.4 ( $C_{\gamma}H_{3Leu}$ ), 20.0 ( $C_{\delta}H_{3Val}$ ), 18.6 ( $C_{\delta}H_{3Ala}$ ), 18.4 ( $C_{\delta}H_{3Val}$ ). IR (film,  $cm^{-1}$ ):  $\nu_{max}$  = 3319, 2963, 2931, 2872, 1628, 1567, 1530; HRMS (ESI<sup>+</sup>):  $m/z$  calcd for  $C_{25}H_{52}N_7O_5$  [M+H]<sup>+</sup> 530.4030, found 530.4006.

#### BocAib<sup>u</sup>-Val<sup>u</sup>-Ala<sup>u</sup>-Leu<sup>u</sup>-NH(CO)NH*i*Pr **U7**

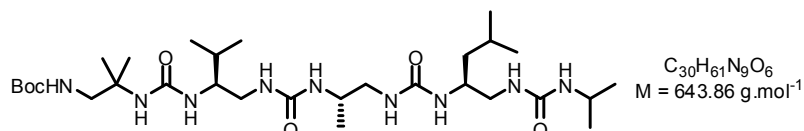

**U7** was prepared from **U6** (150 mg, 0.28 mmol), **M2** (93 mg, 0.28 mmol) and DIPEA (145  $\mu$ L, 0.85 mmol) as described in the general procedure B2. The pure oligomer **U7** (50 mg, 27.4% in two steps) was isolated as a white solid. <sup>1</sup>H NMR (500 MHz, CD<sub>3</sub>OD)  $\delta$  = 6.87 (1H, t,  $J$  = 6.9, NH), 6.40 (1H, d,  $J$  = 9.4, NH), 6.13 (1H, d,  $J$  = 9.4, NH), 5.93 (1H, d,  $J$  = 9.0, NH), 5.79 (1H, s, NH), 5.77 (1H, d,  $J$  = 10.0, NH), 5.61 (1H, d,  $J$  = 9.8, NH), 4.09-3.96 (1H, m, NCH<sub>Ala</sub>), 3.94-3.85 (1H, m, NCH<sub>Leu</sub>), 3.77-3.68 (1H, m, NCH<sub>Val</sub> and NCH<sub>iPr</sub>), 3.67-3.44 (4H, m, NCH<sub>A</sub>H<sub>BAib<sup>u</sup></sub>, NCH<sub>A</sub>H<sub>BVal</sub>, NCH<sub>A</sub>H<sub>BLeu</sub> and NCH<sub>A</sub>H<sub>BAla</sub>), 2.87-2.76 (1H, m, NCH<sub>A</sub>H<sub>BAib<sup>u</sup></sub>), 2.70-2.57 (1H, m, NCH<sub>A</sub>H<sub>BLeu</sub>), 2.53-2.32 (2H, m, NCH<sub>A</sub>H<sub>BVal</sub> and NCH<sub>A</sub>H<sub>BAla</sub>), 1.69 (1H, non,  $J$  = 6.8, CH<sub>Leu</sub>), 1.62 (1H, oct,  $J$  = 6.7, CH<sub>Val</sub>), 1.46 (9H, s, C(CH<sub>3</sub>)<sub>3</sub>), 1.37 (3H, s, CH<sub>3</sub>), 1.22 (2H, t,  $J$  = 7.2, CH<sub>2Leu</sub>), 1.14 (3H, s, CH<sub>3</sub>), 1.13 (3H, d,  $J$  = 6.5, CH<sub>3iPr</sub>), 1.12 (3H, d,  $J$  = 6.5, CH<sub>3iPr</sub>), 1.04 (3H, d,  $J$  = 6.8, CH<sub>3Ala</sub>), 0.95-0.86 (12H, m, 2 x CH<sub>3Val</sub> and 2 x CH<sub>3Leu</sub>). <sup>13</sup>C NMR (125 MHz, CD<sub>3</sub>OD)  $\delta$  = 161.6 (C=O), 161.5 (C=O), 160.7 (C=O), 160.5 (C=O), 159.1 (C=O), 80.1 (C(CH<sub>3</sub>)<sub>3</sub>), 56.0 (NC $\beta$ H<sub>Val</sub>), 54.8 (C), 49.3 (NC $\beta$ H<sub>Leu</sub>), 47.9 (NCH<sub>2Aib<sup>u</sup></sub>), 47.5 (NC $\alpha$ H<sub>2Ala</sub>), 46.5 (NC $\beta$ H<sub>Ala</sub>), 46.0 (NC $\alpha$ H<sub>2Leu</sub>), 44.5 (NC $\alpha$ H<sub>2Val</sub>), 43.8 (C $\alpha$ H<sub>2Leu</sub>), 42.8 (NCH<sub>iPr</sub>), 31.8 (C $\gamma$ H<sub>Val</sub>), 28.9 (C(CH<sub>3</sub>)<sub>3</sub>), 26.6 (CH<sub>3</sub>), 26.0 (CH<sub>3</sub>), 25.9 (C $\delta$ H<sub>3Leu</sub>), 23.7 (CH<sub>iPr</sub>), 23.7 (CH<sub>iPr</sub>), 23.6 (C $\gamma$ H<sub>3Leu</sub>), 22.6 (C $\gamma$ H<sub>3Leu</sub>), 20.3 (C $\delta$ H<sub>3Val</sub>), 18.8 (C $\delta$ H<sub>3Ala</sub>), 18.6 (C $\delta$ H<sub>3Val</sub>). IR (film,  $cm^{-1}$ ):  $\nu_{max}$  = 3300, 2970, 1656, 1527; Mp: >200 °C; HRMS (ESI<sup>+</sup>):  $m/z$  calcd for  $C_{30}H_{62}N_9O_6$  [M+H]<sup>+</sup> 644.4823, found 644.4826.

#### BocEDA-Val<sup>u</sup>-Ala<sup>u</sup>-Leu<sup>u</sup>-NH(CO)NH*i*Pr **U8**

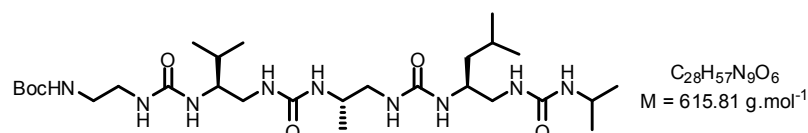

**U8** was prepared from **U6** (100mg, 0.16 mmol), **M3** (47 mg, 0.16 mmol) and DIPEA (79  $\mu$ L, 0.46 mmol) as described in the general procedure B2. The pure oligomer **U8** (50 mg, 52.4% in two steps)

was isolated as a white solid.  $^1\text{H NMR}$  (400 MHz,  $\text{CD}_3\text{OH}$ )  $\delta$  = 6.78-6.66 (1H, m, NH), 6.34-6.20 (2H, m, NH), 6.17-6.04 (2H, m, NH), 5.97 (1H, d,  $J$  = 9.3, NH), 5.91-5.78 (3H, m, NH), 4.06-3.94 (1H, m,  $\text{NCH}_{\text{Ala}}$ ), 3.93-3.85 (1H, m,  $\text{NCH}_{\text{Leu}}$ ), 3.84-3.73 (1H, m,  $\text{NCH}_{\text{IPr}}$ ), 3.66-3.42 (4H, m,  $\text{NCH}_{\text{Val}}$ ,  $\text{NCH}_\text{A}\text{H}_{\text{BVal}}$ ,  $\text{NCH}_\text{A}\text{H}_{\text{BLeu}}$  and  $\text{NCH}_\text{A}\text{H}_{\text{BAla}}$ ), 3.41-3.26 (2H, m, 2 x  $\text{NCH}_\text{A}\text{H}_{\text{BEDA}}$ ), 3.07-2.89 (2H, m, 2 x  $\text{NCH}_\text{A}\text{H}_{\text{BEDA}}$ ), 2.75-2.37 (3H, m,  $\text{NCH}_\text{A}\text{H}_{\text{BLeu}}$ ,  $\text{NCH}_\text{A}\text{H}_{\text{BVal}}$  and  $\text{NCH}_\text{A}\text{H}_{\text{BAla}}$ ), 1.75-1.57 (2H, m,  $\text{CH}_{\text{Leu}}$  and  $\text{CH}_{\text{Val}}$ ), 1.45 (9H, s,  $\text{C}(\text{CH}_3)_3$ ), 1.33-1.16 (2H, m,  $\text{CH}_{2\text{Leu}}$ ), 1.12 (3H, d,  $J$  = 6.5,  $\text{CH}_{3\text{IPr}}$ ), 1.11 (3H, d,  $J$  = 6.5,  $\text{CH}_{3\text{IPr}}$ ), 1.04 (3H, d,  $J$  = 6.7,  $\text{CH}_{3\text{Ala}}$ ), 0.97-0.85 (12H, m, 2 x  $\text{CH}_{3\text{Leu}}$  and 2 x  $\text{CH}_{3\text{Val}}$ ).  $^{13}\text{C NMR}$  (100 MHz,  $\text{CD}_3\text{OH}$ )  $\delta$  = 161.5 (C=O), 161.4 (C=O), 160.6 (C=O), 160.6 (C=O), 159.0 (C=O), 80.2 ( $\text{C}(\text{CH}_3)_3$ ), 56.5 ( $\text{NC}_\beta\text{H}_{\text{Val}}$ ), 49.4 ( $\text{NC}_\beta\text{H}_{\text{Leu}}$ ), 48.0 ( $\text{NC}_\square\text{H}_{2\text{Ala}}$ ), 46.4 ( $\text{NC}_\beta\text{H}_{\text{Ala}}$ ), 46.1 ( $\text{NC}_\square\text{H}_{2\text{Leu}}$ ), 44.5 ( $\text{NC}_\square\text{H}_{2\text{Val}}$ ), 43.8 ( $\text{C}_\square\text{H}_{2\text{Leu}}$ ), 42.8 ( $\text{NCH}_{\text{IPr}}$ ), 41.6 ( $\text{NCH}_2$ ), 41.5 ( $\text{NCH}_2$ ), 31.8 ( $\text{C}_\gamma\text{H}_{\text{Val}}$ ), 28.7 ( $\text{C}(\text{CH}_3)_3$ ), 25.8 ( $\text{C}_\delta\text{H}_{\text{Leu}}$ ), 23.7 ( $\text{CH}_{3\text{IPr}}$ ), 23.6 ( $\text{CH}_{3\text{IPr}}$ ), 23.5 ( $\text{C}_\text{H}_{3\text{Leu}}$ ), 22.5 ( $\text{C}_\text{H}_{3\text{Leu}}$ ), 20.2 ( $\text{C}_\delta\text{H}_{3\text{Val}}$ ), 18.7 ( $\text{C}_\delta\text{H}_{3\text{Ala}}$ ), 18.6 ( $\text{C}_\delta\text{H}_{3\text{Val}}$ ). IR (film,  $\text{cm}^{-1}$ ):  $\nu_{\text{max}}$  = 3310, 2936, 1651, 1538; **Mp**: >200 °C; **HRMS** (ESI<sup>+</sup>):  $m/z$  calcd for  $\text{C}_{28}\text{H}_{57}\text{N}_9\text{O}_6\text{Na}$  [ $\text{M}+\text{Na}$ ]<sup>+</sup> 638.4330, found 638.4324.

### BocLeu<sup>u</sup>-Val<sup>u</sup>-Ala<sup>u</sup>-NH(CO)NH*i*Pr **U9**

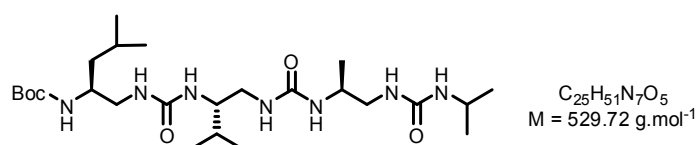

**U9** was prepared from **U4** (583 mg, 0.99 mmol), **Ca** (355 mg, 0.99 mmol) and DIPEA (506  $\mu\text{L}$ , 2.98 mmol) as described in the general procedure B2. The pure oligomer **U9** (450 mg, 85.8% in two steps) was isolated as a white solid.  $^1\text{H NMR}$  (400 MHz,  $\text{CD}_3\text{OH}$ )  $\delta$  = 6.59 (1H, d,  $J$  = 9.6, NH), 6.23-6.14 (1H, m, NH), 6.12-6.02 (1H, m, NH), 6.02-5.87 (2H, m, NH), 5.83 (2H, d,  $J$  = 9.1, NH), 3.95-3.76 (3H, m,  $\text{NCH}_{\text{Ala}}$ ,  $\text{NCH}_{\text{Leu}}$  and  $\text{NCH}_{\text{IPr}}$ ), 3.62-3.55 (2H, m,  $\text{NCH}_{\text{Val}}$  and  $\text{NCH}_\text{A}\text{H}_{\text{BVal}}$ ), 3.55-3.45 (1H, m,  $\text{NCH}_\text{A}\text{H}_{\text{BLeu}}$ ), 3.45-3.36 (1H, m,  $\text{NCH}_\text{A}\text{H}_{\text{BAla}}$ ), 2.80-2.68 (1H, m,  $\text{NCH}_\text{A}\text{H}_{\text{BLeu}}$ ), 2.67-2.58 (1H, m,  $\text{NCH}_\text{A}\text{H}_{\text{BAla}}$ ), 2.57-2.44 (1H, m,  $\text{NCH}_\text{A}\text{H}_{\text{BVal}}$ ), 1.79-1.60 (2H, m,  $\text{CH}_{\text{Leu}}$  and  $\text{CH}_{\text{Val}}$ ), 1.48 (9H, s,  $\text{C}(\text{CH}_3)_3$ ), 1.34-1.18 (2H, m,  $\text{CH}_{2\text{Leu}}$ ), 1.14 (6H, d,  $J$  = 6.5, 2 x  $\text{CH}_{3\text{IPr}}$ ), 1.07 (3H, d,  $J$  = 6.7,  $\text{CH}_{3\text{Ala}}$ ), 1.01-0.87 (12H, m, 2 x  $\text{CH}_{3\text{Val}}$  and 2 x  $\text{CH}_{3\text{Leu}}$ ).  $^{13}\text{C NMR}$  (100 MHz,  $\text{CD}_3\text{OH}$ )  $\delta$  = 161.4 (C=O), 161.1 (C=O), 160.6 (C=O), 159.1 (C=O), 80.1 ( $\text{C}(\text{CH}_3)_3$ ), 56.4 ( $\text{NC}_\beta\text{H}_{\text{Val}}$ ), 50.0 ( $\text{NC}_\beta\text{H}_{\text{Leu}}$ ), 47.1 ( $\text{NC}_\beta\text{H}_{\text{Ala}}$ ), 46.7 ( $\text{NC}_\square\text{H}_{2\text{Ala}}$ ), 46.5 ( $\text{NC}_\square\text{H}_{2\text{Leu}}$ ), 44.5 ( $\text{NC}_\square\text{H}_{2\text{Val}}$ ), 42.8 ( $\text{NCH}_{\text{IPr}}$ ), 42.4 ( $\text{C}_\square\text{H}_{2\text{Leu}}$ ), 31.9 ( $\text{C}_\gamma\text{H}_{\text{Val}}$ ), 28.9 ( $\text{C}(\text{CH}_3)_3$ ), 26.2 ( $\text{C}_\delta\text{H}_{\text{Leu}}$ ), 23.8 ( $\text{C}_\text{H}_{3\text{Leu}}$ ), 23.7 (2 x  $\text{CH}_{\text{IPr}}$ ), 22.5 ( $\text{C}_\text{H}_{3\text{Leu}}$ ), 20.1 ( $\text{C}_\delta\text{H}_{3\text{Val}}$ ), 19.4 ( $\text{C}_\delta\text{H}_{3\text{Ala}}$ ), 18.5 ( $\text{C}_\delta\text{H}_{3\text{Val}}$ ). IR (film,  $\text{cm}^{-1}$ ):  $\nu_{\text{max}}$  = 3339, 2963, 2931, 2871, 1636, 1567;  $[\alpha]_{\text{D}}^{20}$  = +58.8 ( $c$  = 1.00; MeOH); **Mp**: 194-196°C; **HRMS** (ESI<sup>+</sup>):  $m/z$  calcd for  $\text{C}_{25}\text{H}_{52}\text{N}_7\text{O}_5$  [ $\text{M}+\text{H}$ ]<sup>+</sup> 530.4030, found 530.4006.

### N<sub>3</sub>-Aib<sub>4</sub>-Leu<sup>u</sup>-Val<sup>u</sup>-Ala<sup>u</sup>-NH(CO)NH*i*Pr **U10**

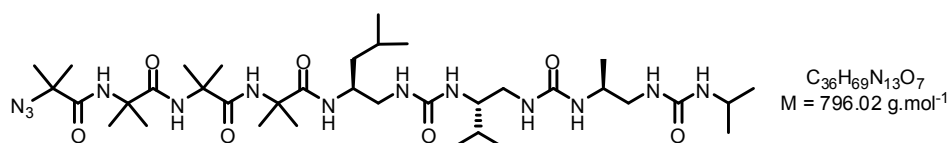

Boc-protected oligourea **U10** (87 mg, 0.16 mmol) was dissolved in TFA (870  $\mu$ L) and stirred for 45 min. The reaction mixture was then concentrated under reduced. Triethylamine (36  $\mu$ L, 0.26 mmol) and an azlactone (85 mg, 0.23 mmol)<sup>1</sup> were added to the crude product in acetonitrile (0.58 mL). The reaction stirred at reflux for 3 d. The solvents were removed under reduced pressure and purification by column chromatography (SiO<sub>2</sub>; CH<sub>2</sub>Cl<sub>2</sub>:MeOH; 99:1→90:10) gave the title compound as a white solid (34 mg, 36.8%). <sup>1</sup>H NMR (400 MHz, CD<sub>3</sub>OH)  $\delta$  = 7.73 (1H, s, NH), 7.27 (1H, d,  $J$  = 9.8, NH), 6.10 (1H, d,  $J$  = 9.3, NH), 5.97 (1H, d,  $J$  = 9.8, NH), 5.79-5.68 (1H, m, NH), 5.60 (1H, d,  $J$  = 10.0, NH), 4.28-4.10 (1H, m, NCH<sub>Leu</sub>), 3.99-3.87 (1H, m, NCH<sub>Ala</sub>), 3.86-3.77 (1H, m, NCH<sub>iPr</sub>), 3.74-3.48 (4H, m, NCH<sub>Val</sub>, NCH<sub>AH<sup>B</sup>Val</sub>, NCH<sub>AH<sup>B</sup>Leu</sub> and NCH<sub>AH<sup>B</sup>Ala</sub>), 2.77-2.60 (1H, m, NCH<sub>AH<sup>B</sup>Ala</sub> and NCH<sub>AH<sup>B</sup>Leu</sub>), 2.46 (1H, dd,  $J$  = 13.8 and 11.8, NCH<sub>AH<sup>B</sup>Val</sub>), 1.73-1.58 (2H, m, CH<sub>Leu</sub> and CH<sub>Val</sub>), 1.48-1.37 (1H, m, CH<sub>AH<sup>B</sup>Leu</sub>), 1.56 (3H, s, CH<sub>3</sub>), 1.53 (9H, s, 3 x CH<sub>3</sub>), 1.47 (3H, s, CH<sub>3</sub>), 1.45 (3H, s, CH<sub>3</sub>), 1.43 (3H, s, CH<sub>3</sub>), 1.39 (3H, s, CH<sub>3</sub>), 1.27-1.17 (1H, m, CH<sub>AH<sup>B</sup>Leu</sub>), 1.14 (6H, d,  $J$  = 6.5, 2 x CH<sub>3*iPr*</sub>), 1.06 (3H, d,  $J$  = 6.7, CH<sub>3Ala</sub>), 0.99-0.83 (12H, m, 2 x CH<sub>3Val</sub> and 2 x CH<sub>3Leu</sub>). <sup>13</sup>C NMR (100 MHz, CD<sub>3</sub>OH)  $\delta$  = 178.2 (C=O), 176.7 (C=O), 175.0 (C=O), 161.7 (C=O), 161.3 (C=O), 161.3 (C=O), 160.7 (C=O), 64.8 (CN<sub>3</sub>), 58.4 (C), 57.9 (C), 57.8 (C), 57.8 (C), 56.4 (NC <sub>$\beta$</sub> H<sub>Val</sub>), 48.7 (NC <sub>$\beta$</sub> H<sub>Leu</sub>), 47.0 (NC <sub>$\beta$</sub> H<sub>Ala</sub>), 46.7 (NC $\square$ H<sub>2Ala</sub>), 46.0 (NC $\square$ H<sub>2Leu</sub>), 44.4 (NC $\square$ H<sub>2Val</sub>), 42.8 (NCH<sub>iPr</sub>), 42.3 (C $\square$ H<sub>2Leu</sub>), 32.2 (C $\gamma$ H<sub>Val</sub>), 28.1 (CH<sub>3</sub>), 27.4 (CH<sub>3</sub>), 26.3 (CH<sub>3</sub>), 25.9 (CH<sub>3</sub>), 24.6 (C $\delta$ H<sub>Leu</sub>), 24.5 (CH<sub>3</sub>), 23.8 (CH<sub>iPr</sub>), 23.8 (CH<sub>iPr</sub>), 23.7 (C<sub>H<sub>3</sub>Leu</sub>), 23.6 (CH<sub>3</sub>), 23.4 (CH<sub>3</sub>), 23.1 (CH<sub>3</sub>), 22.4 (C<sub>H<sub>3</sub>Leu</sub>), 20.1 (C $\delta$ H<sub>3Val</sub>), 19.5 (C $\delta$ H<sub>3Ala</sub>), 18.5 (C $\delta$ H<sub>3Val</sub>).

### GlyNH<sub>2</sub>-Aib<sub>4</sub>-(Val<sup>u</sup>)<sub>rev</sub>-NH(Boc) **2a**

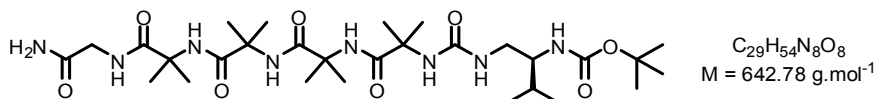

**2a** was prepared from GlyNH<sub>2</sub>-Aib<sub>4</sub>-NH<sub>2</sub> (547 mg, 1.32 mmol), **Cc** (453 mg, 1.32 mmol) and DIPEA (673  $\mu$ L, 3.96 mmol) as described in the general procedure B. The pure oligomer **2a** (500 mg, 58.9%) was isolated as a white solid. <sup>1</sup>H NMR (500 MHz, CD<sub>3</sub>OH)  $\delta$  = 8.60 (1H, s, NH), 8.14 (1H, t,  $J$  = 6.3, NH<sub>Gly</sub>), 8.07 (1H, s, NH), 7.95 (1H, s, NH), 7.43 (1H, s, NH<sub>Val</sub>), 7.22 (1H, s, NH), 6.38 (1H, s, NH), 6.32

(1H, d,  $J = 9.5$ ,  $NH_{Val}$ ), 5.99 (1H, t,  $J = 7.0$ ,  $NH_{Val}$ ), 3.94 (1H, dd,  $J = 17.5$  and  $7.0$ ,  $NCH_ACH_{BGly}$ ), 3.72 (1H, dd,  $J = 17.5$  and  $5.7$ ,  $NCH_ACH_{BGly}$ ), 3.57-3.36 (2H, m,  $NCH_AH_{BVal}$  and  $NCH_{Val}$ ), 2.82-2.75 (1H, m,  $NCH_AH_{BVal}$ ), 1.69 (1H, oct,  $J = 6.9$ ,  $CH_{Val}$ ), 1.50 (3H, s,  $CH_3$ ), 1.50 (3H, s,  $CH_3$ ), 1.47-1.40 (24H, m,  $C(CH_3)_3$  and  $5 \times CH_3$ ), 1.34 (3H, s,  $CH_3$ ), 0.94 (3H, d,  $J = 6.9$ ,  $CH_{3Val}$ ), 0.91 (3H, d,  $J = 6.9$ ,  $CH_{3Val}$ ).  $^{13}C$  NMR (125 MHz,  $CD_3OH$ )  $\delta = 178.3$  (C=O), 178.1 (C=O), 178.1 (C=O), 178.0 (C=O), 175.4 (C=O), 160.2 (C=O), 158.5 (C=O), 79.7 (C-O), 58.1 (C), 58.0 (C), 57.8 (C), 57.6 (C), 57.0 ( $NC_{\beta}H_{Val}$ ), 43.7 ( $NCH_2Gly$ ), 43.4 ( $NC_{\alpha}H_{2Val}$ ), 31.5 ( $NC_{\gamma}H_{Val}$ ), 28.8 ( $C(CH_3)_3$ ), 26.7 ( $CH_3$ ), 26.5 ( $CH_3$ ), 26.5 ( $CH_3$ ), 24.8 ( $CH_3$ ), 24.6 ( $CH_3$ ), 24.3 ( $CH_3$ ), 19.9 ( $C_{\delta}H_{3Val}$ ), 18.8 ( $C_{\delta}H_{3Val}$ ). IR (film,  $cm^{-1}$ ):  $\nu_{max} = 3306, 2981, 2935, 1651, 1543$ ;  $[\alpha]_D^{20} = +24.8$  ( $c = 1.00$ ; MeOH); **Mp**: 88-90 °C; **HRMS** (ESI<sup>+</sup>):  $m/z$  calcd for  $C_{29}H_{55}N_8O_8$   $[M+H]^+$  643.4137, found 643.4118.

### GlyNH<sub>2</sub>-Aib<sub>4</sub>-(Val<sup>H</sup>)<sub>rev</sub>-(Ala<sup>H</sup>)<sub>rev</sub>-NHBoc **2b**

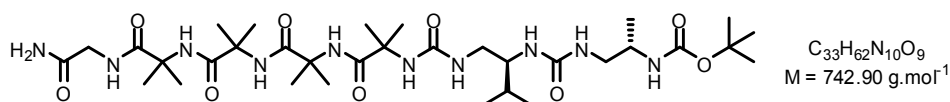

**2b** was prepared from **2a** (400 mg, 0.62 mmol), **Cb** (196 mg, 0.62 mmol) and DIPEA (318  $\mu$ L, 1.87 mmol) as described in the general procedure B. The pure oligomer **2b** (100 mg, 21.6%) was isolated as a white solid.  $^1H$  NMR (500 MHz,  $CD_3OH$ )  $\delta = 8.57$  (1H, s, NH), 8.48 (1H, s, NH), 8.15 (1H, t,  $J = 6.2$ ,  $NH_{Gly}$ ), 7.96 (1H, s, NH), 6.60 (1H, s,  $NH_{Ala}$ ), 6.59 (1H, s, NH), 6.04 (1H, t,  $J = 5.9$ ,  $NH_{Ala}$ ), 5.95 (1H, d,  $J = 5.9$ ,  $NH_{Val}$ ), 5.78 (1H, d,  $J = 9.1$ ,  $NH_{Val}$ ), 3.97 (1H, dd,  $J = 17.6$  and  $7.1$ ,  $NCH_AH_{BGly}$ ), 3.94-3.83 (1H, m,  $NCH_{Val}$ ), 3.69 (2H, dd,  $J = 17.6$  and  $5.7$ ,  $NCH_AH_{BGly}$ ), 3.66-3.53 (2H, m,  $NCH_{Ala}$  and  $NCH_AH_{BVal}$ ), 2.77-2.65 (1H, m,  $NCH_AH_{BVal}$ ), 2.59-2.44 (1H, m,  $NCH_2Ala$ ), 1.65 (1H, oct,  $J = 6.7$ ,  $CH_{Val}$ ), 1.51 (3H, s,  $CH_3$ ), 1.50 (3H, s,  $CH_3$ ), 1.47-1.40 (24H, m,  $C(CH_3)_3$  and  $5 \times CH_3$ ), 1.34 (3H, s,  $CH_3$ ), 1.08 (3H, d,  $J = 6.9$ ,  $CH_{3Ala}$ ), 0.94 (3H, d,  $J = 6.9$ ,  $CH_{3Val}$ ), 0.91 (3H, d,  $J = 6.9$ ,  $CH_{3Val}$ ).  $^{13}C$  NMR (125 MHz,  $CD_3OH$ )  $\delta = 178.5$  (C=O), 178.2 (C=O), 178.1 (C=O), 178.1 (C=O), 175.4 (C=O), 160.8 (C=O), 160.4 (C=O), 158.7 (C=O), 80.1 (C-O), 58.1 (C), 57.9 (C), 57.8 (C), 56.9 (C), 56.5 ( $NC_{\beta}H_{Val}$ ), 47.6 ( $NC_{\alpha}H_{2Ala}$ ), 47.3 ( $NC_{\beta}H_{Ala}$ ), 44.7 ( $NCH_2Gly$ ), 43.8 ( $NC_{\alpha}H_{2Val}$ ), 31.6 ( $NC_{\gamma}H_{Val}$ ), 28.7 ( $C(CH_3)_3$ ), 27.1 ( $CH_3$ ), 27.0 ( $CH_3$ ), 26.9 ( $CH_3$ ), 26.7 ( $CH_3$ ), 24.7 ( $CH_3$ ), 24.3 ( $CH_3$ ), 23.9 ( $CH_3$ ), 23.8 ( $CH_3$ ), 20.1 ( $C_{\delta}H_{3Val}$ ), 18.8 ( $C_{\delta}H_{3Val}$ ), 18.4 ( $C_{\gamma}H_{3Ala}$ ). IR (film,  $cm^{-1}$ ):  $\nu_{max} = 3282, 2981, 2935, 1649, 1544$ ;  $[\alpha]_D^{20} = +8.0$  ( $c = 1.00$ ; MeOH); **Mp**: 103-105 °C; **HRMS** (ESI<sup>+</sup>):  $m/z$  calcd for  $C_{33}H_{62}N_{10}O_9Na$   $[M+H]^+$  765.4599, found 765.4586.

**GlyNH<sub>2</sub>-Aib<sub>4</sub>-(Val<sup>u</sup>)<sub>rev</sub>-(Ala<sup>u</sup>)<sub>rev</sub>-(Leu<sup>u</sup>)<sub>rev</sub>-NHBoc 2c**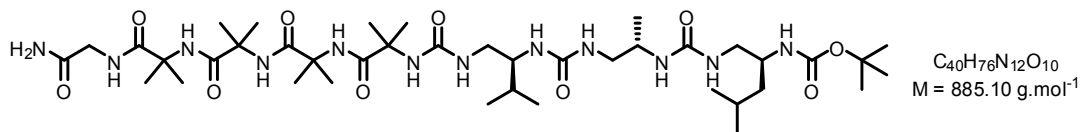

**2c** was prepared from **2b** (90 mg, 0.12 mmol), **Ca** (43 mg, 0.12 mmol) and DIPEA (21  $\mu$ L, 0.36 mmol) as described in the general procedure B. The pure oligomer **2c** (80 mg, 74.7%) was isolated as a white solid. <sup>1</sup>H NMR (500 MHz, CD<sub>3</sub>OH)  $\delta$  = 8.57 (1H, s, NH), 8.46 (1H, s, NH), 8.16 (1H, t,  $J$  = 6.7, NH<sub>Gly</sub>), 7.94 (1H, s, NH), 7.43 (1H, s, NH), 7.22 (1H, s, NH), 6.88 (1H, s, NH), 6.60 (1H, d,  $J$  = 10.0, NH<sub>Leu</sub>), 6.44 (1H, brd,  $J$  = 9.5, NH<sub>Val</sub>), 6.08 (1H, t,  $J$  = 6.7, NH<sub>Leu</sub>), 5.88 (1H, dd,  $J$  = 9.4 and 3.4, NH<sub>Ala</sub>), 5.84 (1H, d,  $J$  = 9.9, NH<sub>Ala</sub>), 5.76 (1H, d,  $J$  = 10.4, NH<sub>Val</sub>), 4.13-4.02 (1H, m, NCH<sub>Ala</sub>), 3.98 (1H, dd,  $J$  = 17.5 and 7.2, NCH<sub>AH<sub>B</sub>Gly</sub>), 3.89-3.76 (1H, m, NCH<sub>Leu</sub>), 3.68 (1H, dd,  $J$  = 17.5 and 5.5, NCH<sub>AH<sub>B</sub>Gly</sub>), 3.74-3.54 (3H, m, NCH<sub>AH<sub>B</sub>Ala</sub>, NCH<sub>Val</sub> and NCH<sub>AH<sub>B</sub>Val</sub>), 3.44 (1H, ddd,  $J$  = 14.1, 7.3 and 3.5, NCH<sub>AH<sub>B</sub>Leu</sub>), 2.56-2.41 (2H, m, NCH<sub>AH<sub>B</sub>Leu</sub> and NCH<sub>AH<sub>B</sub>Val</sub>), 2.39-2.25 (1H, m, NCH<sub>AH<sub>B</sub>Ala</sub>), 1.76-1.55 (2H, m, CH<sub>Val</sub> and CH<sub>Leu</sub>), 1.51 (3H, s, CH<sub>3</sub>), 1.50 (3H, s, CH<sub>3</sub>), 1.48-1.42 (24H, m, 5 x CH<sub>3</sub> and C(CH<sub>3</sub>)<sub>3</sub>), 1.34 (3H, s, CH<sub>3</sub>), 1.31-1.14 (2H, m, CH<sub>2Leu</sub>), 1.06 (3H, d,  $J$  = 7.0, CH<sub>3Ala</sub>), 0.94 (3H, d,  $J$  = 6.7, CH<sub>3Val</sub>), 0.93 (3H, d,  $J$  = 6.9, CH<sub>3Val</sub>), 0.90 (3H, d,  $J$  = 6.6, CH<sub>3Leu</sub>), 0.89 (3H, d,  $J$  = 6.8, CH<sub>3Leu</sub>). <sup>13</sup>C NMR (125 MHz, CD<sub>3</sub>OH)  $\delta$  = 178.6 (C=O), 178.3 (C=O), 178.2 (C=O), 178.1 (C=O), 175.4 (C=O), 161.4 (C=O), 160.9 (C=O), 160.7 (C=O), 159.2 (C=O), 80.1 (C-O), 58.1 (C), 57.9 (C), 57.9 (C), 56.9 (C), 55.8 (NC $\beta$ H<sub>Val</sub>), 50.0 (NC $\beta$ H<sub>Leu</sub>), 48.5 (NC $\alpha$ H<sub>2Ala</sub>), 46.8 (NC $\alpha$ H<sub>2Leu</sub>), 46.6 (NC $\beta$ H<sub>Ala</sub>), 44.5 (NC $\alpha$ H<sub>2Val</sub>), 43.8 (NCH<sub>2Gly</sub>), 42.3 (C $\alpha$ H<sub>2Leu</sub>), 31.9 (C $\gamma$ H<sub>Val</sub>), 28.8 (C(CH<sub>3</sub>)<sub>3</sub>), 27.4 (CH<sub>3</sub>), 27.2 (CH<sub>3</sub>), 27.1 (CH<sub>3</sub>), 26.8 (CH<sub>3</sub>), 26.2 (C $\delta$ H<sub>Leu</sub>), 24.5 (CH<sub>3</sub>), 24.3 (CH<sub>3</sub>), 23.8 (CH<sub>3</sub>), 23.7 (CH<sub>3</sub>), 23.5 (C $\delta$ H<sub>3Leu</sub>), 22.6 (C $\delta$ H<sub>3Leu</sub>), 20.0 (C $\delta$ H<sub>3Val</sub>), 18.6 (C $\delta$ H<sub>3Val</sub>), 18.4 (C $\gamma$ H<sub>3Ala</sub>). IR (film, cm<sup>-1</sup>):  $\nu_{\max}$  = 3297, 2975, 1659, 1537; [ $\alpha$ ]<sub>D</sub><sup>20</sup> = + 30.0 (c = 1.00; MeOH); **mp**: 138-140 °C; **HRMS** (ESI<sup>+</sup>):  $m/z$  calcd for C<sub>40</sub>H<sub>77</sub>O<sub>10</sub>N<sub>12</sub> [M+H]<sup>+</sup> 885.5880, found 885.5880.

**GlyNH<sub>2</sub>-Aib<sub>4</sub>-(Val<sup>u</sup>)<sub>rev</sub>-(Ala<sup>u</sup>)<sub>rev</sub>-(Leu<sup>u</sup>)<sub>rev</sub>-NH(CO)NH*i*Pr 2d**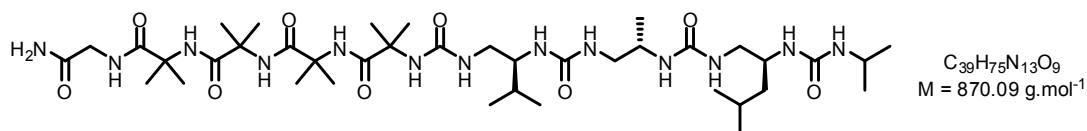

**2d** was prepared from **2c** (60 mg, 0.07 mmol), isopropyl isocyanate (13.3  $\mu$ L, 0.14 mmol) and DIPEA (28  $\mu$ L, 0.20 mmol) as described in the general procedure C. The pure oligomer **2d** (56 mg, 94.9%) was isolated as a white solid. <sup>1</sup>H NMR (500 MHz, CD<sub>3</sub>OH)  $\delta$  = 8.58 (1H, s, NH), 8.44 (1H, s, NH), 8.18



(1H, t,  $J =$ ,  $NH_{Gly}$ ), 7.96 (1H, s, NH), 7.47 (1H, s, NH), 7.26 (1H, s, NH), 6.98 (1H, s, NH), 6.39 (1H, dd,  $J =$ ,  $NH_{Val}$ ), 6.28 (1H, dd,  $J =$ ,  $NH_{Ala}$ ), 6.12 (1H, d,  $J =$ ,  $NH_{Val}$ ), 6.06 (1H, t,  $J = 6.7$ ,  $NH_{Leu}$ ), 5.95 (1H, d,  $J =$ ,  $NH_{Ala}$ ), 5.73 (1H, d,  $J =$ ,  $NH_{iPr}$ ), 5.57 (1H, d,  $J =$ ,  $NH_{Leu}$ ), 4.09-3.90 (2H, m,  $NCH_{Ala}$  and  $NCH_{Leu}$ ), 3.96 (1H, dd,  $J =$  and,  $NCH_AH_{BGly}$ ), 3.80 (1H, oct,  $J =$ ,  $NH_{iPr}$ ), 3.70 (1H, dd,  $J =$  and,  $NCH_AH_{BGly}$ ), 3.67-3.58 (2H, m,  $NCH_AH_{BVal}$  and  $NCH_{Val}$ ), 3.57-3.47 (1H, m,  $NCH_AH_{BAla}$ ), 3.44-3.35 (1H, m,  $NCH_AH_{BLeu}$ ), 2.64-2.48 (2H, m,  $NCH_AH_{BLeu}$  and  $NCH_AH_{BVal}$ ), 2.47-2.38 (1H, m,  $NCH_AH_{BAla}$ ), 1.76-1.55 (2H, m,  $CH_{Val}$  and  $CH_{Leu}$ ), 1.51 (3H, s,  $CH_3$ ), 1.50 (3H, s,  $CH_3$ ), 1.48-1.42 (24H, m, 5 x  $CH_3$  and  $C(CH_3)_3$ ), 1.34 (3H, s,  $CH_3$ ), 1.26-1.18 (2H, m,  $CH_{2Leu}$ ), 1.13 (6H, d,  $J =$ ,  $CH_3$ ), 1.06 (3H, d,  $J =$ ,  $CH_{3Ala}$ ), 0.93 (6H, d,  $J =$ ,  $CH_{3Val}$ ), 0.89 (6H, d,  $J = 6.9$ ,  $CH_{3Leu}$ ).  $^{13}C$  NMR (125 MHz,  $CD_3OH$ )  $\delta = 178.6$  (C=O), 178.4 (C=O), 178.2 (C=O), 175.5 (C=O), 163.1 (C=O), 162.8 (C=O), 161.8 (C=O), 161.0 (C=O), 160.7 (C=O), 160.5 (C=O), 58.1 (C), 57.9 (C), 57.8 (C), 56.9 (C), 56.0 ( $NC_{\beta}H_{Val}$ ), 48.7 ( $NC_{\beta}H_{Leu}$ ), 48.2 ( $NC_{\square}H_{2Ala}$ ), 47.2 ( $NC_{\square}H_{2Leu}$ ), 46.8 ( $NC_{\beta}H_{Ala}$ ), 44.3 ( $NC_{\square}H_{2Val}$ ), 43.7 ( $NCH_{2Gly}$ ), 43.0 ( $NCH_{iPr}$ ), 43.0 ( $C_{\square}H_{2Leu}$ ), 31.9 ( $C_{\gamma}H_{Val}$ ), 27.2 ( $CH_3$ ), 27.0 ( $CH_3$ ), 26.9 ( $CH_3$ ), 26.7 ( $CH_3$ ), 26.2 ( $C_{\delta}H_{Leu}$ ), 24.6 ( $CH_3$ ), 24.4 ( $CH_3$ ), 23.9 ( $CH_3$ ), 23.8 ( $CH_3$ ), 23.6 ( $CH_{3Leu}$ ), 23.5 ( $CH_{3iPr}$ ), 23.4 ( $CH_{3iPr}$ ), 22.5 ( $C_{\delta}H_{3Leu}$ ), 20.0 ( $C_{\delta}H_{3Val}$ ), 18.8 ( $C_{\delta}H_{3Val}$ ), 18.5 ( $C_{\gamma}H_{3Ala}$ ). IR (film,  $cm^{-1}$ ):  $\nu_{max} = 3325, 2965, 1648, 1555$ ;  $[\alpha]_D^{20} = +28$  ( $c = 1.00$ ; MeOH); **Mp**: > 200 °C; **HRMS** (ESI<sup>+</sup>):  $m/z$  calcd for  $C_{39}H_{76}O_9N_{13}$   $[M+H]^+$  870.5883, found 870.5873.

### GlyNH<sub>2</sub>-Aib<sub>4</sub>-Aib<sup>u</sup>-NHoc 3

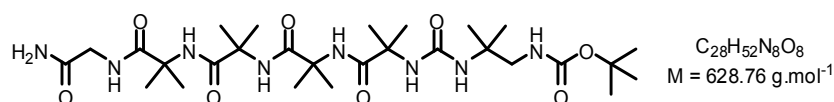

**3** was prepared from GlyNH<sub>2</sub>AiB<sub>4</sub>NHoc (650 mg, 1.57 mmol), **M2** (517 mg, 1.57 mmol) and DIPEA (800  $\mu$ L, 4.70 mmol) as described in the general procedure B. The pure oligomer **3** (200 mg, 20.3%) was isolated as a white solid.  $^1H$  NMR (500 MHz,  $CD_3OH$ )  $\delta = 8.81$  (1H, s, NH), 8.20 (1H, s, NH), 8.15 (1H, t,  $J = 5.8$ ,  $NH_{Gly}$ ), 7.98 (1H, s, NH), 7.44 (1H, s, NH), 7.27 (1H, s, NH), 6.65 (1H, t,  $J = 5.9$ ,  $NH_{Aibu}$ ), 6.06 (1H, s, NH), 5.75 (1H, s, NH), 3.83 (2H, brd,  $J = 17.5$  and 7.0,  $NCH_{2Gly}$ ), 3.25 (2H, brd,  $J = 4.5$ ,  $NCH_{2Aibu}$ ), 1.50 (6H, s,  $CH_3$ ), 1.45 (15H, m,  $C(CH_3)_3$  and 2 x  $CH_3$ ), 1.43 (6H, s,  $CH_3$ ), 1.35 (6H, s,  $CH_3$ ), 1.25 (6H, s,  $CH_3$ ).  $^{13}C$  NMR (125 MHz,  $CD_3OH$ )  $\delta = 178.4$  (C=O), 178.2 (2 x C=O), 178.1 (C=O), 175.4 (C=O), 159.2 (C=O), 158.3 (C=O), 79.7 (C-O), 58.1 (C), 58.1 (C), 57.8 (C), 56.8 (C), 54.6 (C), 48.8 ( $NCH_{2Aibu}$ ), 43.7 ( $NCH_{2Gly}$ ), 28.7 ( $C(CH_3)_3$ ), 26.0 (2 x  $CH_3$ ), 25.8 (2 x  $CH_3$ ), 25.5 (6 x  $CH_3$ ). IR (film,  $cm^{-1}$ ):  $\nu_{max} = 3343, 2982, 29341, 1650, 1542$ ; **Mp**: 103-105 °C; **HRMS** (ESI<sup>+</sup>):  $m/z$  calcd for  $C_{28}H_{53}O_8N_8$   $[M+H]^+$  629.3981, found 629.3974.

**GlyNH<sub>2</sub>-Aib<sub>4</sub>-Aib<sup>u</sup>-(Val<sup>u</sup>)<sub>rev</sub>-NH<sub>2</sub>Boc 3a**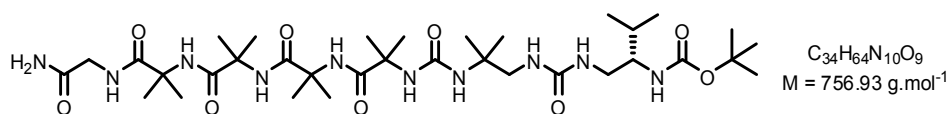

**3a** was prepared from **3** (200 mg, 0.32 mmol), **Cc** (109 mg, 0.32 mmol) and DIPEA (162  $\mu$ L, 0.95 mmol) as described in the general procedure B. The pure oligomer **3a** (150 mg, 62.3%) was isolated as a white solid. <sup>1</sup>H NMR (500 MHz, CD<sub>3</sub>OH)  $\delta$  = 8.74 (1H, s, NH), 8.46 (1H, s, NH), 8.15 (1H, t,  $J$  = 6.1, NH<sub>Gly</sub>), 7.91 (1H, s, NH), 7.45 (1H, s, NH), 7.23 (1H, s, NH), 6.45 (1H, d,  $J$  = 9.8, NH<sub>Val</sub>), 6.38 (1H, s, NH), 6.13 (1H, t,  $J$  = 6.0, NH<sub>Aib<sup>u</sup></sub>), 6.00 (1H, t,  $J$  = 5.9, NH<sub>Val</sub>), 5.58 (1H, s, NH), 3.91 (1H, dd,  $J$  = 17.4 and 6.6, NCH<sub>A</sub>CH<sub>BGly</sub>), 3.75 (1H, dd,  $J$  = 17.3 and 5.7, NCH<sub>A</sub>CH<sub>BGly</sub>), 3.71-3.59 (1H, m, NCH<sub>A</sub>H<sub>BAib<sup>u</sup></sub>), 3.58-3.50 (1H, m, NCH<sub>Val</sub>), 3.49-3.39 (1H, m, NCH<sub>A</sub>H<sub>BVal</sub>), 2.95-2.88 (1H, m, NCH<sub>A</sub>H<sub>BAib<sup>u</sup></sub>), 2.79 (1H, ddd,  $J$  = 6.9, NCH<sub>A</sub>H<sub>BVal</sub>), 1.68 (1H, oct,  $J$  = 6.8, CH<sub>Val</sub>), 1.50 (6H, s, 2 x CH<sub>3</sub>), 1.46 (6H, s, 2 x CH<sub>3</sub>), 1.45 (9H, s, C(CH<sub>3</sub>)<sub>3</sub>), 1.42 (6H, s, 2 x CH<sub>3</sub>), 1.40 (3H, s, CH<sub>3</sub>), 1.35 (6H, s, 2 x CH<sub>3</sub>), 1.15 (3H, s, CH<sub>3</sub>), 0.97 (3H, d,  $J$  = 6.7, CH<sub>3Val</sub>), 0.92 (3H, d,  $J$  = 6.8, CH<sub>3Val</sub>). <sup>13</sup>C NMR (125 MHz, CD<sub>3</sub>OH)  $\delta$  = 178.6 (C=O), 178.5 (C=O), 178.2 (C=O), 178.1 (C=O), 175.4 (C=O), 160.7 (C=O), 159.3 (C=O), 159.1 (C=O), 79.9 (C-O), 58.1 (C), 58.0 (C), 57.8 (C), 57.5 (NC $\beta$ H<sub>Val</sub>), 56.8 (C), 55.0 (C), 48.5 (NCH<sub>2</sub>Aib<sup>u</sup>), 43.8 (NCH<sub>2</sub>Gly), 43.4 (NC $\alpha$ H<sub>2Val</sub>), 32.0 (NC $\gamma$ H<sub>Val</sub>), 28.8 (C(CH<sub>3</sub>)<sub>3</sub>), 26.8 (CH<sub>3</sub>), 26.3 (3 x CH<sub>3</sub>), 26.2 (CH<sub>3</sub>), 25.5 (CH<sub>3</sub>), 25.0 (CH<sub>3</sub>), 24.9 (CH<sub>3</sub>), 24.6 (2 x CH<sub>3</sub>), 19.9 (C $\delta$ H<sub>3Val</sub>), 18.8 (C $\delta$ H<sub>3Val</sub>). IR (film, cm<sup>-1</sup>):  $\nu_{\text{max}}$  = 3295, 2976, 2941, 1654, 1555;  $[\alpha]_D^{20}$  = +29.0 (c = 1.00; MeOH); **Mp**: 115-117 °C; **HRMS** (ESI<sup>+</sup>):  $m/z$  calcd for C<sub>34</sub>H<sub>64</sub>O<sub>9</sub>N<sub>10</sub>Na [M+Na]<sup>+</sup> 779.4755, found 779.4684.

**GlyNH<sub>2</sub>-Aib<sub>4</sub>-Aib<sup>u</sup>-(Val<sup>u</sup>)<sub>rev</sub>-(Ala<sup>u</sup>)<sub>rev</sub>-NH<sub>2</sub>Boc 3b**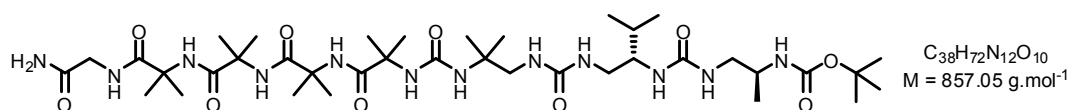

**3b** was prepared from **3a** (115 mg, 0.15 mmol), **Cb** (48 mg, 0.15 mmol) and DIPEA (78  $\mu$ L, 0.46 mmol) as described in the general procedure B. The pure oligomer **3b** (58 mg, 44.5%) was isolated as a white solid. <sup>1</sup>H NMR (500 MHz, CD<sub>3</sub>OH)  $\delta$  = 8.74 (1H, s, NH), 8.45 (1H, s, NH), 8.16 (1H, t,  $J$  = 6.3, NH<sub>Gly</sub>), 7.98 (1H, s, NH), 7.47 (1H, s, NH), 7.25 (1H, s, NH), 6.56 (1H, d,  $J$  = 8.8, NH<sub>Ala</sub>), 6.47 (1H, s, NH), 6.15-6.05 (2H, m, NH<sub>Ala</sub> and NH<sub>Aib<sup>u</sup></sub>), 6.04-5.97 (1H, m, NH<sub>Val</sub>), 5.87 (1H, d,  $J$  = 9.4, NH<sub>Val</sub>), 5.78 (1H, s, NH), 3.92 (1H, dd,  $J$  = 17.5 and 6.8, NCH<sub>A</sub>CH<sub>BGly</sub>), 3.75 (1H, dd,  $J$  = 17.2 and 5.7, NCH<sub>A</sub>CH<sub>BGly</sub>), 3.83-3.64 (3H, m, NCH<sub>A</sub>H<sub>BAib<sup>u</sup></sub>, NCH<sub>Ala</sub> and NCH<sub>Val</sub>), 3.61-3.48 (1H, m, NCH<sub>A</sub>H<sub>BVal</sub>), 3.29-3.22 (1H, m, NCH<sub>A</sub>H<sub>BAla</sub>),

2.95-2.78 (2H, m, NCH<sub>A</sub>H<sub>BAIa</sub> and NCH<sub>A</sub>H<sub>BAIb</sub>), 2.69-2.55 (1H, m, NCH<sub>A</sub>H<sub>BVal</sub>), 1.67 (1H, oct, *J* = 6.9, CH<sub>Val</sub>), 1.50 (6H, s, 2 x CH<sub>3</sub>), 1.46 (6H, s, 2 x CH<sub>3</sub>), 1.44 (9H, s, C(CH<sub>3</sub>)<sub>3</sub>), 1.43 (6H, s, 2 x CH<sub>3</sub>), 1.40 (3H, s, CH<sub>3</sub>), 1.35 (6H, s, 2 x CH<sub>3</sub>), 1.17 (3H, s, CH<sub>3</sub>), 1.07 (3H, d, *J* = 6.8, CH<sub>3Ala</sub>), 0.97 (3H, d, *J* = 6.9, CH<sub>3Val</sub>), 0.93 (3H, d, *J* = 6.9, CH<sub>3Val</sub>). <sup>13</sup>C NMR (125 MHz, CD<sub>3</sub>OH) δ = 178.6 (2 x C=O), 178.2 (C=O), 178.2 (C=O), 175.5 (C=O), 161.5 (C=O), 160.9 (C=O), 159.4 (C=O), 158.4 (C=O), 80.0 (C-O), 58.1 (C), 58.0 (C), 57.8 (C), 56.8 (NC<sub>β</sub>H<sub>Val</sub>), 56.4 (C), 54.8 (C), 48.5 (NCH<sub>2Aib</sub>), 48.0 (NC<sub>□</sub>H<sub>2Ala</sub>), 46.8 (NC<sub>β</sub>H<sub>Ala</sub>), 44.3 (NC<sub>□</sub>H<sub>2Val</sub>), 43.8 (NCH<sub>2Gly</sub>), 31.9 (NC<sub>γ</sub>H<sub>Val</sub>), 28.7 (C(CH<sub>3</sub>)<sub>3</sub>), 26.9 (CH<sub>3</sub>), 26.4 (2 x CH<sub>3</sub>), 26.3 (CH<sub>3</sub>), 26.2 (CH<sub>3</sub>), 25.6 (CH<sub>3</sub>), 24.9 (2 x CH<sub>3</sub>), 24.5 (2 x CH<sub>3</sub>), 20.0 (C<sub>δ</sub>H<sub>3Val</sub>), 18.7 (C<sub>δ</sub>H<sub>3Val</sub>), 18.5 (C<sub>γ</sub>H<sub>3Ala</sub>). IR (film, cm<sup>-1</sup>): ν<sub>max</sub> = 3325, 2963, 1648, 1572; [α]<sub>D</sub><sup>20</sup> = +25.0 (c = 1.00; MeOH); Mp: 130-132 °C; HRMS (ESI<sup>+</sup>): *m/z* calcd for C<sub>38</sub>H<sub>73</sub>O<sub>10</sub>N<sub>12</sub> [M+H]<sup>+</sup> 857.5567, found 857.5566.

### GlyNH<sub>2</sub>-Aib<sub>4</sub>-Aib<sup>u</sup>-(Val<sup>u</sup>)<sub>rev</sub>-(Ala<sup>u</sup>)<sub>rev</sub>-(Leu<sup>u</sup>)<sub>rev</sub>-NHBoc **3c**

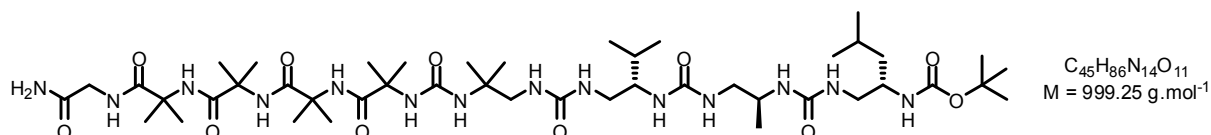

**3c** was prepared from **3b** (50 mg, 0.06 mmol), **Ca** (21 mg, 0.06 mmol) and DIPEA (32 μL, 0.18 mmol) as described in the general procedure B. The pure oligomer **3c** (44 mg, 76%) was isolated as a white solid. <sup>1</sup>H NMR (500 MHz, CD<sub>3</sub>OH) δ = 8.77 (1H, s, NH), 8.43 (1H, s, NH), 8.17 (1H, t, *J* = 6.3, NH<sub>Gly</sub>), 8.01 (1H, s, NH), 7.46 (1H, s, NH), 7.24 (1H, s, NH), 6.61 (1H, d, *J* = 10.0, NH<sub>Leu</sub>), 6.54 (1H, s, NH), 6.44 (1H, d, *J* = 8.7, NH<sub>Val</sub>), 6.37 (1H, dd, *J* = 8.7 and 3.9, NH<sub>Aib<sup>u</sup></sub>), 6.07 (1H, t, *J* = 6.4, NH<sub>Leu</sub>), 5.93 (1H, s, NH<sub>Ala</sub>), 5.91 (1H, s, NH<sub>Val</sub>), 5.82 (1H, d, *J* = 9.8, NH<sub>Ala</sub>), 5.75 (1H, s, NH), 4.09-4.00 (1H, m, NCH<sub>Ala</sub>), 3.96 (1H, dd, *J* = 17.5 and 7.0, NCH<sub>A</sub>CH<sub>BGly</sub>), 3.92-3.82 (1H, m, NCH<sub>Leu</sub>), 3.81-3.65 (3H, m, NCH<sub>A</sub>H<sub>BAib<sup>u</sup></sub>, NCH<sub>A</sub>H<sub>BVal</sub> and NCH<sub>Val</sub>), 3.75 (1H, dd, *J* = 17.5 and 5.9, NCH<sub>A</sub>CH<sub>BGly</sub>), 3.64-3.54 (1H, m, NCH<sub>A</sub>H<sub>BAIa</sub>), 3.42 (1H, ddd, *J* = 14.0, 7.1 and 3.6, NCH<sub>A</sub>H<sub>BLeu</sub>), 2.89 (1H, dd, *J* = 14.4 and 3.3, NCH<sub>A</sub>H<sub>BAib<sup>u</sup></sub>), 2.63-2.55 (1H, m, NCH<sub>A</sub>H<sub>BVal</sub>), 2.53-2.44 (1H, m, NCH<sub>A</sub>H<sub>BLeu</sub>), 2.40-2.30 (1H, m, NCH<sub>A</sub>H<sub>BAIa</sub>), 1.75-1.59 (2H, m, CH<sub>Leu</sub> and CH<sub>Val</sub>), 1.52 (6H, s, 2 x CH<sub>3</sub>), 1.48 (15H, s, 2 x CH<sub>3</sub> and C(CH<sub>3</sub>)<sub>3</sub>), 1.45 (6H, s, 2 x CH<sub>3</sub>), 1.42 (3H, s, CH<sub>3</sub>), 1.39 (3H, s, CH<sub>3</sub>), 1.36 (3H, s, CH<sub>3</sub>), 1.32-1.09 (2H, m, CH<sub>2Leu</sub>), 1.21 (3H, s, CH<sub>3</sub>), 1.05 (3H, d, *J* = 6.9, CH<sub>3Ala</sub>), 0.97 (3H, d, *J* = 6.9, CH<sub>3Val</sub>), 0.94 (3H, d, *J* = 7.1, CH<sub>3Leu</sub>), 0.93 (3H, d, *J* = 7.3, CH<sub>3Val</sub>), 0.90 (3H, d, *J* = 6.7, CH<sub>3Leu</sub>). <sup>13</sup>C NMR (125 MHz, CD<sub>3</sub>OH) δ = 178.6 (2 x C=O), 178.2 (C=O), 178.1 (C=O), 175.4 (C=O), 161.8 (C=O), 161.1 (C=O), 160.6 (C=O), 159.4 (C=O), 159.2 (C=O), 80.1 (C-O), 58.1 (C), 58.0 (C), 57.7 (C), 56.8 (C), 55.9 (NC<sub>β</sub>H<sub>Val</sub>), 54.7 (C), 49.8 (NC<sub>β</sub>H<sub>Leu</sub>), 48.5 (NCH<sub>2Aib</sub>), 48.0 (NC<sub>□</sub>H<sub>2Ala</sub>), 46.9 (NC<sub>α</sub>H<sub>2Leu</sub>), 46.5 (NC<sub>β</sub>H<sub>Ala</sub>), 43.9 (NC<sub>□</sub>H<sub>2Val</sub>), 43.8 (NCH<sub>2Gly</sub>), 42.2 (C<sub>□</sub>H<sub>2Leu</sub>), 32.4 (NC<sub>γ</sub>H<sub>Val</sub>), 28.8 (C(CH<sub>3</sub>)<sub>3</sub>), 27.0 (CH<sub>3</sub>), 26.7 (2 x CH<sub>3</sub>), 26.5 (C<sub>δ</sub>H<sub>Leu</sub>), 26.2 (CH<sub>3</sub>), 26.2 (CH<sub>3</sub>), 25.7 (CH<sub>3</sub>), 24.7 (2 x CH<sub>3</sub>), 24.4 (CH<sub>3</sub>), 24.3 (CH<sub>3</sub>), 23.5

( $C_{\delta}H_{3Leu}$ ), 22.5 ( $C_{\delta}H_{3Leu}$ ), 19.8 ( $C_{\delta}H_{3Val}$ ), 18.7 ( $C_{\delta}H_{3Val}$ ), 18.5 ( $C_{\gamma}H_{3Ala}$  IR (film,  $cm^{-1}$ ):  $\nu_{max}$  = 3287, 2970, 1636, 1549;  $[\alpha]_D^{20}$  = + 34.0 (c = 1.00; MeOH); **Mp**: 154-156 °C; **HRMS** (ESI<sup>+</sup>):  $m/z$  calcd for  $C_{45}H_{87}O_{11}N_{14}$   $[M+H]^+$  999.6673, found 999.6655.

**GlyNH<sub>2</sub>-Aib<sub>4</sub>-Aib<sup>u</sup>-(Val<sup>u</sup>)<sub>rev</sub>-(Ala<sup>u</sup>)<sub>rev</sub>-(Leu<sup>u</sup>)<sub>rev</sub>-NH(CO)NH*i*Pr **3d****

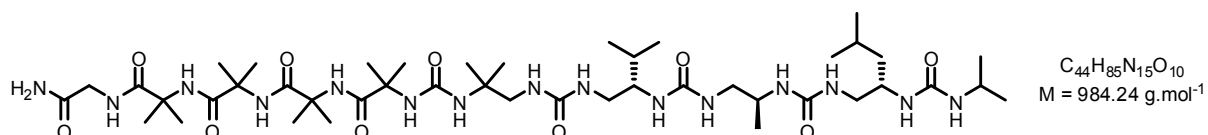

**3d** was prepared from **3c** (40 mg, 0.04 mmol), isopropyl isocyanate (7.9  $\mu$ L, 0.08 mmol) and DIPEA (17  $\mu$ L, 0.12 mmol) as described in the general procedure C. The pure oligomer **3d** (35 mg, 88.9%) was isolated as a white solid. <sup>1</sup>H NMR (500 MHz, CD<sub>3</sub>OH)  $\delta$  = 8.75 (1H, s, NH), 8.40 (1H, s, NH), 8.16 (1H, t,  $J$  = 6.3, NH<sub>Gly</sub>), 7.99 (1H, s, NH), 7.45 (1H, s, NH), 7.23 (1H, s, NH), 6.52 (1H, s, NH), 6.45-6.34 (2H, m, NH<sub>Val</sub> and NH<sub>Aibu</sub>), 6.28 (1H, dd,  $J$  = 9.4 and 3.2, NH<sub>Ala</sub>), 6.24 (1H, d,  $J$  = 10.3, NH<sub>Val</sub>), 5.95 (1H, t,  $J$  = 7.1, NH<sub>Leu</sub>), 5.85 (1H, d,  $J$  = 9.7, NH<sub>Ala</sub>), 5.75 (1H, s, NH), 5.68 (1H, d,  $J$  = 7.9, NH<sub>ipr</sub>), 5.50 (1H, d,  $J$  = 9.5, NH<sub>Leu</sub>), 4.08-3.96 (2H, m, NCH<sub>Leu</sub> and NCH<sub>Ala</sub>), 3.93 (1H, dd,  $J$  = 17.6 and 7.0, NCH<sub>A</sub>CH<sub>BGly</sub>), 3.80 (1H, oct,  $J$  = 6.7, NCH<sub>ipr</sub>), 3.77-3.68 (2H, m, NCH<sub>A</sub>H<sub>BAibu</sub> and NCH<sub>Val</sub>), 3.74 (1H, dd,  $J$  = 17.8 and 6.0, NCH<sub>A</sub>CH<sub>BGly</sub>), 3.67-3.59 (1H, m, NCH<sub>A</sub>H<sub>BVal</sub>), 3.58-3.47 (1H, m, NCH<sub>A</sub>H<sub>BAla</sub>), 3.43-3.35 (1H, m, NCH<sub>A</sub>H<sub>BLeu</sub>), 2.94-2.83 (1H, m, NCH<sub>A</sub>H<sub>BAibu</sub>), 2.63-2.54 (1H, m, NCH<sub>A</sub>H<sub>BVal</sub>), 2.53-2.47 (1H, m, NCH<sub>A</sub>H<sub>BLeu</sub>), 2.46-2.37 (1H, m, NCH<sub>A</sub>H<sub>BAla</sub>), 1.72-1.57 (2H, m, CH<sub>Leu</sub> and CH<sub>Val</sub>), 1.50 (6H, s, 2 x CH<sub>3</sub>), 1.47 (3H, s, CH<sub>3</sub>), 1.46 (3H, s, CH<sub>3</sub>), 1.43 (3H, s, CH<sub>3</sub>), 1.42 (3H, s, CH<sub>3</sub>), 1.40 (3H, s, CH<sub>3</sub>), 1.37 (3H, s, CH<sub>3</sub>), 1.34 (3H, s, CH<sub>3</sub>), 1.32-1.09 (2H, m, CH<sub>2Leu</sub>), 1.19 (3H, s, CH<sub>3</sub>), 1.13 (6H, d,  $J$  = 6.6, CH<sub>3ipr</sub>), 1.03 (3H, d,  $J$  = 6.9, CH<sub>3Ala</sub>), 0.95 (3H, d,  $J$  = 6.9, CH<sub>3Val</sub>), 0.92 (3H, d,  $J$  = 6.7, CH<sub>3Leu</sub>), 0.91 (3H, d,  $J$  = 6.9, CH<sub>3Val</sub>), 0.88 (3H, d,  $J$  = 6.7, CH<sub>3Leu</sub>). <sup>13</sup>C NMR (125 MHz, CD<sub>3</sub>OH)  $\delta$  = 178.6 (2 x C=O), 178.2 (C=O), 178.1 (C=O), 175.4 (C=O), 162.1 (C=O), 161.1 (C=O), 160.8 (C=O), 160.5 (C=O), 159.4 (C=O), 58.1 (C), 58.0 (C), 57.7 (C), 56.8 (C), 56.1 (NC $\beta$ H<sub>Val</sub>), 54.7 (C), 48.7 (NC $\beta$ H<sub>Leu</sub>), 48.5 (NCH<sub>2Aibu</sub>), 48.1 (NC $\square$ H<sub>2Ala</sub>), 47.4 (NC $\alpha$ H<sub>2Leu</sub>), 46.6 (NC $\beta$ H<sub>Ala</sub>), 43.9 (NC $\square$ H<sub>2Val</sub>), 43.8 (C $\square$ H<sub>2Leu</sub>), 43.0 (NCH<sub>2Gly</sub>), 43.0 (NCH<sub>ipr</sub>), 32.3 (NC $\gamma$ H<sub>Val</sub>), 26.9 (CH<sub>3</sub>), 26.6 (2 x CH<sub>3</sub>), 26.4 (C $\delta$ H<sub>Leu</sub>), 26.2 (2 x CH<sub>3</sub>), 25.7 (CH<sub>3</sub>), 24.8 (2 x CH<sub>3</sub>), 24.5 (CH<sub>3</sub>), 24.4 (CH<sub>3</sub>), 23.6 (C $\delta$ H<sub>3Leu</sub>), 23.5 (C $\delta$ H<sub>3Leu</sub>), 23.5 (C $\delta$ H<sub>3Leu</sub>), 22.5 (C $\delta$ H<sub>3Leu</sub>), 19.8 (C $\delta$ H<sub>3Val</sub>), 18.8 (C $\delta$ H<sub>3Val</sub>), 18.7 (C $\gamma$ H<sub>3Ala</sub>). IR (film,  $cm^{-1}$ ):  $\nu_{max}$  = 3297, 2966, 2930, 2872, 1638, 1546;  $[\alpha]_D^{20}$  = +64.8 (c = 1.00; MeOH). **Mp**: 166-168 °C; **HRMS** (ESI<sup>+</sup>):  $m/z$  calcd for  $C_{44}H_{86}O_{10}N_{15}$   $[M+H]^+$  984.6677, found 984.6677.

#### GlyNH<sub>2</sub>-Aib<sub>4</sub>-(Aib<sup>U</sup>)<sub>rev</sub>-NH<sub>2</sub>Boc **4**

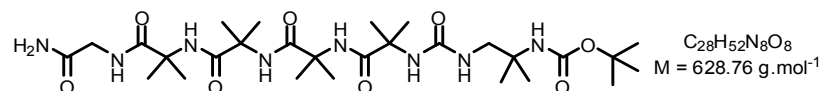

**4** was prepared from GlyNH<sub>2</sub>-Aib<sub>4</sub>-NH<sub>2</sub>Boc (518 mg, 1.25 mmol), **M1** (4.12 mg, 1.25 mmol) and DIPEA (638 μL, 3.75 mmol) as described in the general procedure B. The pure oligomer **4** (521 mg, 82.9%) was isolated as a white solid. <sup>1</sup>H NMR (500 MHz, CD<sub>3</sub>OH) δ = 8.56 (1H, s, NH), 8.15 (1H, t, J = 6.2, NH<sub>Gly</sub>), 8.03 (1H, s, NH), 8.01 (1H, s, NH), 7.44 (1H, s, NH), 7.27 (1H, s, NH), 6.48 (2H, s, NH), 6.26 (1H, t, J = 6.3, NH<sub>Aibu</sub>), 3.83 (2H, brd, J = 6.2, NCH<sub>2Gly</sub>), 3.28 (2H, brd, J = 6.2, NCH<sub>2Aibu</sub>), 1.49 (6H, s, 2 x CH<sub>3</sub>), 1.46 (6H, s, 2 x CH<sub>3</sub>), 1.40 (9H, s, C(CH<sub>3</sub>)<sub>3</sub>), 1.39 (6H, s, 2 x CH<sub>3</sub>), 1.39 (6H, s, 2 x CH<sub>3</sub>), 1.23 (6H, s, 2 x CH<sub>3</sub>). <sup>13</sup>C NMR (125 MHz, CD<sub>3</sub>OH) δ = 178.2 (C=O), 178.1 (C=O), 178.1 (C=O), 177.9 (C=O), 175.4 (C=O), 160.5 (C=O), 156.8 (C=O), 79.8 (C-O), 58.1 (C), 58.0 (C), 57.5 (C), 57.1 (C), 54.8 (C), 49.5 (NCH<sub>2Aibu</sub>), 43.7 (NCH<sub>2Gly</sub>), 28.7 (C(CH<sub>3</sub>)<sub>3</sub>), 25.6 (4 x CH<sub>3</sub>), 25.4 (2 x CH<sub>3</sub>), 25.2 (2 x CH<sub>3</sub>), 25.2 (2 x CH<sub>3</sub>). IR (film, cm<sup>-1</sup>): ν<sub>max</sub> = 3304, 2982, 2934, 1642, 1539; HRMS (ESI<sup>+</sup>): m/z calcd for C<sub>28</sub>H<sub>53</sub>O<sub>8</sub>N<sub>8</sub> [M+H]<sup>+</sup> 629.3981, found 629.3971.

#### GlyNH<sub>2</sub>-Aib<sub>4</sub>-(Aib<sup>U</sup>)<sub>rev</sub>-(Val<sup>U</sup>)<sub>rev</sub>-NH<sub>2</sub>Boc **4a**

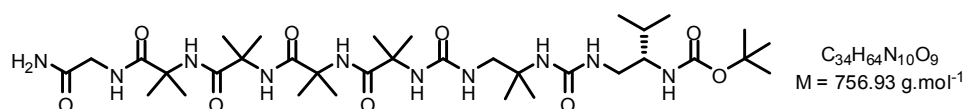

**4a** was prepared from **4** (474 mg, 0.75 mmol), **Cc** (259 mg, 0.75 mmol) and DIPEA (418 μL, 2.26 mmol) as described in the general procedure B. The pure oligomer **4a** (281 mg, 49.2%) was isolated as a white solid. <sup>1</sup>H NMR (500 MHz, CD<sub>3</sub>OH) δ = 8.50 (1H, s, NH), 8.14 (1H, t, J = 6.3, NH<sub>Gly</sub>), 7.97 (2H, s, NH), 7.46 (1H, s, NH), 7.24 (1H, s, NH), 6.41 (1H, s, NH), 6.36 (1H, d, J = 9.8, NH<sub>Val</sub>), 6.15 (1H, t, J = 6.4, NH<sub>Aibu</sub>), 5.84 (1H, s, NH), 5.75 (1H, t, J = 5.7, NH<sub>Val</sub>), 3.85 (1H, dd, J = 17.5 and 6.4, NCH<sub>A</sub>CH<sub>BGly</sub>), 3.80 (1H, dd, J = 17.4 and 6.2, NCH<sub>A</sub>CH<sub>BGly</sub>), 3.49 (1H, dd, J = 13.5 and 5.8, NCH<sub>A</sub>H<sub>BAibu</sub>), 3.45-3.39 (1H, m, NCH<sub>Val</sub>), 3.39-3.33 (2H, m, NCH<sub>A</sub>H<sub>BVal</sub> and NCH<sub>A</sub>H<sub>BAibu</sub>), 2.88 (1H, ddd, J = 14.8, 9.9 and 5.7, NCH<sub>A</sub>H<sub>BVal</sub>), 1.70 (1H, oct, J = 6.8, CH<sub>Val</sub>), 1.50 (6H, s, 2 x CH<sub>3</sub>), 1.45 (15H, s, C(CH<sub>3</sub>)<sub>3</sub> and 2 x CH<sub>3</sub>), 1.39 (12H, s, 4 x CH<sub>3</sub>), 1.25 (3H, s, CH<sub>3</sub>), 1.19 (3H, s, CH<sub>3</sub>), 0.94 (3H, d, J = 6.9, CH<sub>3Val</sub>), 0.90 (3H, d, J = 6.9, CH<sub>3Val</sub>). <sup>13</sup>C NMR (125 MHz, CD<sub>3</sub>OH) δ = 178.2 (C=O), 178.1 (C=O), 178.1 (C=O), 178.0 (C=O), 175.5 (C=O), 160.4 (C=O), 160.1 (C=O), 158.8 (C=O), 79.8 (C-O), 58.1 (C), 58.0 (C), 57.6 (C), 57.5 (NC<sub>β</sub>H<sub>Val</sub>), 57.0 (C), 54.4 (C), 49.2 (NCH<sub>2Aibu</sub>), 43.7 (NCH<sub>2Gly</sub>), 42.7 (NC<sub>α</sub>H<sub>2Val</sub>), 31.9 (NC<sub>γ</sub>H<sub>Val</sub>), 28.8 (C(CH<sub>3</sub>)<sub>3</sub>), 26.5

(CH<sub>3</sub>), 25.9 (CH<sub>3</sub>), 25.7 (CH<sub>3</sub>), 25.5 (2 x CH<sub>3</sub>), 25.4 (2 x CH<sub>3</sub>), 25.1 (2 x CH<sub>3</sub>), 25.0 (CH<sub>3</sub>), 19.8 (C<sub>δ</sub>H<sub>3Val</sub>), 18.4 (C<sub>δ</sub>H<sub>3Val</sub>). IR (film, cm<sup>-1</sup>): ν<sub>max</sub> = 3283, 2962, 2938, 1648, 1537; [α]<sub>D</sub><sup>20</sup> = + 26.0 (c = 1.00; MeOH); **Mp**: 116-118 °C ; **HRMS** (ESI<sup>+</sup>): *m/z* calcd for C<sub>34</sub>H<sub>65</sub>O<sub>9</sub>N<sub>10</sub> [M+H]<sup>+</sup> 757.4930, found 757.4928.

#### GlyNH<sub>2</sub>-Aib<sub>4</sub>-(Aib<sup>u</sup>)<sub>rev</sub>-(Val<sup>u</sup>)<sub>rev</sub>-(Ala<sup>u</sup>)<sub>rev</sub>-NHBoc **4b**

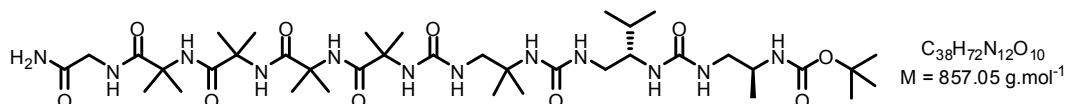

**4b** was prepared from **4a** (280 mg, 0.37 mmol), **Cb** (117 mg, 0.37 mmol) and DIPEA (205 μL, 1.11 mmol) as described in the general procedure B. The pure oligomer **4b** (260 mg, 82.0%) was isolated as a white solid. <sup>1</sup>H NMR (500 MHz, CD<sub>3</sub>OH) δ = 8.43 (1H, s, NH), 8.14 (1H, t, *J* = 6.3, NH<sub>Gly</sub>), 8.00 (1H, s, NH), 7.96 (1H, s, NH), 7.43 (1H, s, NH), 7.22 (1H, s, NH), 6.65 (1H, d, *J* = 9.3, NH<sub>Ala</sub>), 6.54 (1H, s, NH), 6.38-6.33 (1H, dd, *J* = 7.4 and 2.2, NH<sub>Aibu</sub>), 6.13 (1H, t, *J* = 6.0, NH<sub>Ala</sub>), 6.00 (1H, s, NH), 5.83 (1H, d, *J* = 10.1, NH<sub>Val</sub>), 5.78 (1H, dd, *J* = 8.6 and 3.6, NH<sub>Val</sub>), 3.95-3.71 (1H, m, NCH<sub>Ala</sub>), 3.88 (1H, dd, *J* = 17.4 and 6.7, NCH<sub>A</sub>CH<sub>BGly</sub>), 3.77 (1H, dd, *J* = 17.4 and 6.0, NCH<sub>A</sub>CH<sub>BGly</sub>), 3.71-3.50 (3H, m, NCH<sub>A</sub>H<sub>BAibu</sub>, NCH<sub>A</sub>H<sub>BVal</sub> and NCH<sub>Val</sub>), 3.42-3.33 (2H, m, NCH<sub>A</sub>H<sub>BAIla</sub> and NCH<sub>A</sub>H<sub>BAibu</sub>), 2.78-2.68 (1H, m, NCH<sub>A</sub>H<sub>BAIla</sub>), 2.54-2.43 (1H, m, NCH<sub>A</sub>H<sub>BVal</sub>), 1.76-1.59 (1H, m, CH<sub>Val</sub>), 1.50 (6H, s, 2 x CH<sub>3</sub>), 1.46 (18H, s, 3 x CH<sub>3</sub> and C(CH<sub>3</sub>)<sub>3</sub>), 1.40 (3H, s, CH<sub>3</sub>), 1.39 (3H, s, CH<sub>3</sub>), 1.38 (3H, s, CH<sub>3</sub>), 1.29 (3H, s, CH<sub>3</sub>), 1.10 (3H, s, CH<sub>3</sub>), 1.10 (3H, d, *J* = 7.0, CH<sub>3Ala</sub>), 0.96 (3H, d, *J* = 6.9, CH<sub>3Val</sub>), 0.92 (3H, d, *J* = 6.9, CH<sub>3Val</sub>). <sup>13</sup>C NMR (125 MHz, CD<sub>3</sub>OH) δ = 178.1 (C=O), 178.1 (C=O), 178.1 (C=O), 178.0 (C=O), 175.4 (C=O), 161.6 (C=O), 160.3 (C=O), 160.2 (C=O), 158.6 (C=O), 80.2 (C-O), 58.1 (C), 58.0 (C), 57.5 (C), 57.0 (NC<sub>β</sub>H<sub>Val</sub>), 56.2 (C), 54.7 (C), 48.0 (NCH<sub>2Aibu</sub>), 47.7 (NC<sub>β</sub>H<sub>Ala</sub>), 47.5 (NC<sub>α</sub>H<sub>2Ala</sub>), 44.2 (NC<sub>α</sub>H<sub>2Val</sub>), 43.7 (NCH<sub>2Gly</sub>), 31.8 (NC<sub>γ</sub>H<sub>Val</sub>), 28.7 (C(CH<sub>3</sub>)<sub>3</sub>), 26.9 (CH<sub>3</sub>), 26.4 (2 x CH<sub>3</sub>), 26.0 (CH<sub>3</sub>), 25.9 (CH<sub>3</sub>), 25.8 (CH<sub>3</sub>), 25.5 (CH<sub>3</sub>), 25.0 (CH<sub>3</sub>), 24.6 (CH<sub>3</sub>), 24.5 (CH<sub>3</sub>), 19.9 (C<sub>δ</sub>H<sub>3Val</sub>), 18.7 (C<sub>δ</sub>H<sub>3Val</sub>), 18.5 (C<sub>γ</sub>H<sub>3Ala</sub>). IR (film, cm<sup>-1</sup>): ν<sub>max</sub> = 3312, 2974, 2944, 1649, 1540; [α]<sub>D</sub><sup>20</sup> = + 33.0 (c = 1.00; MeOH); **Mp**: 128-130 °C; **HRMS** (ESI<sup>+</sup>): *m/z* calcd for C<sub>38</sub>H<sub>73</sub>O<sub>10</sub>N<sub>12</sub> [M+H]<sup>+</sup> 857.5567, found 857.5559.

**GlyNH<sub>2</sub>-Aib<sub>4</sub>-(Aib<sup>u</sup>)<sub>rev</sub>-(Val<sup>u</sup>)<sub>rev</sub>-(Ala<sup>u</sup>)<sub>rev</sub>-(Leu<sup>u</sup>)<sub>rev</sub>-NH<sub>2</sub>Boc 4c**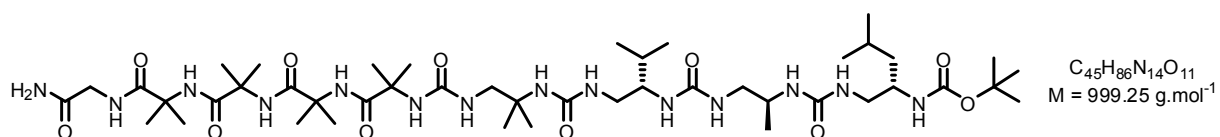

**4c** was prepared from **4b** (240 mg, 0.28 mmol), **Ca** (100 mg, 0.28 mmol) and DIPEA (109  $\mu$ L, 0.84 mmol) as described in the general procedure B. The pure oligomer **4c** (215 mg, 76.8%) was isolated as a white solid. <sup>1</sup>H NMR (500 MHz, CD<sub>3</sub>OH)  $\delta$  = 8.38 (1H, s, NH), 8.14 (1H, t,  $J$  = 5.2, NH<sub>Gly</sub>), 8.04 (1H, s, NH), 7.96 (1H, s, NH), 7.46 (1H, s, NH), 7.24 (1H, s, NH), 6.65 (1H, s, NH), 6.62 (1H, d,  $J$  = 10.0, NH<sub>Leu</sub>), 6.43-6.21 (3H, m, NH, NH<sub>Aib<sup>u</sup></sub> and NH<sub>Val</sub>), 6.11 (1H, brs, NH<sub>Leu</sub>), 6.03 (1H, d,  $J$  = 8.5, NH<sub>Ala</sub>), 5.89 (1H, s, NH<sub>Val</sub>), 5.87 (1H, s, NH<sub>Ala</sub>), 4.03-3.94 (1H, m, NCH<sub>Ala</sub>), 3.92-3.69 (2H, m, NCH<sub>Val</sub> and NCH<sub>Leu</sub>), 3.89 (1H, dd,  $J$  = 17.6 and 6.4, NCH<sub>A</sub>CH<sub>BGly</sub>), 3.75 (1H, dd,  $J$  = 16.6 and 4.5, NCH<sub>A</sub>CH<sub>BGly</sub>), 3.69-3.62 (1H, m, NCH<sub>A</sub>H<sub>BAib<sup>u</sup></sub>), 3.62-3.50 (2H, m, NCH<sub>A</sub>H<sub>BVal</sub> and NCH<sub>A</sub>H<sub>BAla</sub>), 3.49-3.37 (1H, m, NCH<sub>A</sub>H<sub>BLeu</sub>), 2.30-3.21 (1H, m, NCH<sub>A</sub>H<sub>BAib<sup>u</sup></sub>), 2.50-2.43 (2H, m, NCH<sub>A</sub>H<sub>BLeu</sub> and NCH<sub>A</sub>H<sub>BVal</sub>), 2.42-2.33 (1H, m, NCH<sub>A</sub>H<sub>BAla</sub>), 1.73-1.57 (2H, m, CH<sub>Leu</sub> and CH<sub>Val</sub>), 1.50 (6H, s, 2 x CH<sub>3</sub>), 1.46 (12H, s, 1 x CH<sub>3</sub> and C(CH<sub>3</sub>)<sub>3</sub>), 1.44 (6H, s, 2 x CH<sub>3</sub>), 1.39 (3H, s, CH<sub>3</sub>), 1.38 (3H, s, CH<sub>3</sub>), 1.37 (3H, s, CH<sub>3</sub>), 1.30 (3H, s, CH<sub>3</sub>), 1.28-1.15 (2H, m, CH<sub>2Leu</sub>), 1.08 (3H, s, CH<sub>3</sub>), 1.06 (3H, d,  $J$  = 7.0, CH<sub>3Ala</sub>), 0.94 (3H, d,  $J$  = 10.3, CH<sub>3Val</sub>), 0.93 (3H, d,  $J$  = 6.8, CH<sub>3Leu</sub>), 0.89 (3H, d,  $J$  = 6.6, CH<sub>3Val</sub>), 0.88 (3H, d,  $J$  = 7.0, CH<sub>3Leu</sub>). <sup>13</sup>C NMR (125 MHz, CD<sub>3</sub>OH)  $\delta$  = 178.1 (3 x C=O), 178.0 (2 x C=O), 162.3 (C=O), 160.6 (C=O), 160.5 (C=O), 160.2 (C=O), 159.3 (C=O), 80.1 (C-O), 58.1 (C), 58.0 (C), 57.5 (C), 56.9 (C), 55.5 (NC $\beta$ H<sub>Val</sub>), 53.8 (C), 49.7 (NC $\beta$ H<sub>Leu</sub>), 48.5 (NC $\beta$ H<sub>2Ala</sub>), 47.9 (NCH<sub>2</sub>Aib<sup>u</sup>), 46.8 (NC $\beta$ H<sub>2Leu</sub>), 46.8 (NC $\beta$ H<sub>Ala</sub>), 43.9 (NCH<sub>2</sub>Gly), 43.8 (NC $\beta$ H<sub>2Val</sub>), 42.1 (C $\beta$ H<sub>2Leu</sub>), 31.8 (NC $\gamma$ H<sub>Val</sub>), 28.8 (C(CH<sub>3</sub>)<sub>3</sub>), 27.0 (CH<sub>3</sub>), 26.6 (C $\delta$ H<sub>Leu</sub>), 26.2 (3 x CH<sub>3</sub>), 26.2 (CH<sub>3</sub>), 25.7 (CH<sub>3</sub>), 25.4 (CH<sub>3</sub>), 24.8 (CH<sub>3</sub>), 24.4 (CH<sub>3</sub>), 24.2 (CH<sub>3</sub>), 23.5 (C $\delta$ H<sub>3Leu</sub>), 22.6 (C $\delta$ H<sub>3Leu</sub>), 19.9 (C $\delta$ H<sub>3Val</sub>), 18.6 (C $\gamma$ H<sub>3Ala</sub>), 18.2 (C $\delta$ H<sub>3Val</sub>). IR (film, cm<sup>-1</sup>):  $\nu_{\text{max}}$  = 3290, 2961, 2938, 1635, 1571;  $[\alpha]_{\text{D}}^{20}$  = + 38.0 (c = 1.00; MeOH); Mp: 144-146 °C; HRMS (ESI<sup>+</sup>):  $m/z$  calcd for C<sub>45</sub>H<sub>87</sub>O<sub>11</sub>N<sub>14</sub> [M+H]<sup>+</sup> 999.6673, found 999.6657.

**GlyNH<sub>2</sub>-Aib<sub>4</sub>-(Aib<sup>u</sup>)<sub>rev</sub>-(Val<sup>u</sup>)<sub>rev</sub>-(Ala<sup>u</sup>)<sub>rev</sub>-(Leu<sup>u</sup>)<sub>rev</sub>-NH(CO)NH<sub>2</sub>Pr 4d**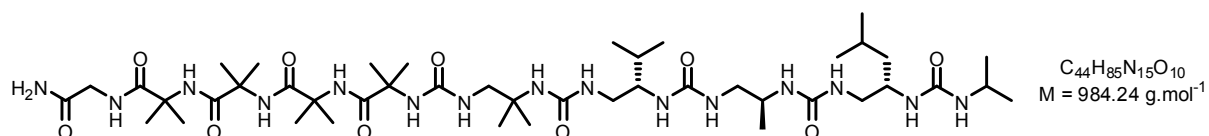

**4d** was prepared from **4c** (107 mg, 0.11 mmol), isopropyl isocyanate (21  $\mu$ L, 0.21 mmol) and DIPEA (44.8  $\mu$ L, 0.32 mmol) as described in the general procedure C. The pure oligomer **4d** (71 mg, 67.4%)

was isolated as a white solid.  $^1\text{H NMR}$  (500 MHz,  $\text{CD}_3\text{OH}$ )  $\delta$  = 8.38 (1H, s, NH), 8.14 (1H, t,  $J$  = 6.2,  $\text{NH}_{\text{Gly}}$ ), 8.05 (1H, s, NH), 7.96 (1H, s, NH), 7.43 (1H, s, NH), 7.23 (1H, brs, NH), 6.69 (1H, s, NH), 6.50-6.40 (2H, m,  $\text{NH}_{\text{Val}}$  and  $\text{NH}_{\text{Aibu}}$ ), 6.35 (1H, dd,  $J$  = 9.2 and 2.0,  $\text{NH}_{\text{Ala}}$ ), 6.32-6.22 (2H, m,  $\text{NH}_{\text{Val}}$ ), 5.96 (1H, t,  $J$  = 6.7,  $\text{NH}_{\text{Leu}}$ ), 5.86 (1H, d,  $J$  = 9.9,  $\text{NH}_{\text{Ala}}$ ), 5.69 (1H, d,  $J$  = 7.8,  $\text{NH}_{\text{Ipr}}$ ), 5.49 (1H, d,  $J$  = 9.5,  $\text{NH}_{\text{Leu}}$ ), 4.10-3.94 (2H, m,  $\text{NCH}_{\text{Leu}}$  and  $\text{NCH}_{\text{Ala}}$ ), 3.91 (1H, dd,  $J$  = 17.5 and 6.7,  $\text{NCH}_A\text{CH}_{\text{BGly}}$ ), 3.78 (1H, oct,  $J$  = 6.9,  $\text{NCH}_{\text{Ipr}}$ ), 3.77-3.72 (1H, m,  $\text{NCH}_{\text{Val}}$ ), 3.74 (1H, dd,  $J$  = 17.2 and 5.5,  $\text{NCH}_A\text{CH}_{\text{BGly}}$ ), 3.70-3.64 (1H, m,  $\text{NCH}_A\text{H}_{\text{BAibu}}$ ), 3.63-3.52 (2H, m,  $\text{NCH}_A\text{H}_{\text{BVal}}$  and  $\text{NCH}_A\text{H}_{\text{BAla}}$ ), 3.45 (1H, ddd,  $J$  = 13.6, 7.4 and 3.4,  $\text{NCH}_A\text{H}_{\text{BLEu}}$ ), 3.30-3.25 (1H, m,  $\text{NCH}_A\text{H}_{\text{BAibu}}$ ), 2.56-2.33 (3H, m,  $\text{NCH}_A\text{H}_{\text{BVal}}$ ,  $\text{NCH}_A\text{H}_{\text{BLEu}}$  and  $\text{NCH}_A\text{H}_{\text{BAla}}$ ), 1.68 (1H, non,  $J$  = 6.9,  $\text{CH}_{\text{Leu}}$ ), 1.61 (1H, oct,  $J$  = 6.7,  $\text{CH}_{\text{Val}}$ ), 1.50 (6H, s, 2 x  $\text{CH}_3$ ), 1.46 (3H, s,  $\text{CH}_3$ ), 1.45 (6H, s, 2 x  $\text{CH}_3$ ), 1.41 (3H, s,  $\text{CH}_3$ ), 1.39 (3H, s,  $\text{CH}_3$ ), 1.38 (3H, s,  $\text{CH}_3$ ), 1.32 (3H, s,  $\text{CH}_3$ ), 1.21 (2H, t,  $J$  = 7.4,  $\text{CH}_{2\text{Leu}}$ ), 1.13 (6H, d,  $J$  = 6.6,  $\text{CH}_{3\text{Ipr}}$ ), 1.09 (3H, s,  $\text{CH}_3$ ), 1.06 (3H, d,  $J$  = 6.9,  $\text{CH}_{3\text{Ala}}$ ), 0.95 (3H, d,  $J$  = 8.1,  $\text{CH}_{3\text{Val}}$ ), 0.93 (3H, d,  $J$  = 7.2,  $\text{CH}_{3\text{Leu}}$ ), 0.89 (6H, d,  $J$  = 6.8,  $\text{CH}_{3\text{Val}}$  and  $\text{CH}_{3\text{Leu}}$ ).  $^{13}\text{C NMR}$  (125 MHz,  $\text{CD}_3\text{OH}$ )  $\delta$  = 178.2 (C=O), 178.1 (C=O), 178.1 (C=O), 178.0 (C=O), 175.4 (C=O), 162.8 (C=O), 160.8 (C=O), 160.5 (C=O), 160.5 (C=O), 160.2 (C=O), 58.1 (C), 58.0 (C), 57.5 (C), 56.9 (C), 55.6 ( $\text{NC}_{\beta}\text{H}_{\text{Val}}$ ), 53.8 (C), 48.5 ( $\text{NC}_{\beta}\text{H}_{\text{Leu}}$ ), 48.5 ( $\text{NC}_{\square}\text{H}_{2\text{Ala}}$ ), 47.8 ( $\text{NCH}_{2\text{Aibu}}$ ), 47.4 ( $\text{NC}_{\square}\text{H}_{2\text{Leu}}$ ), 46.9 ( $\text{NC}_{\beta}\text{H}_{\text{Ala}}$ ), 43.8 ( $\text{NC}_{\square}\text{H}_{2\text{Val}}$ ), 43.8 ( $\text{NCH}_{2\text{Gly}}$ ), 43.1 ( $\text{NCH}_{\text{Ipr}}$ ), 42.9 ( $\text{C}_{\square}\text{H}_{2\text{Leu}}$ ), 31.9 ( $\text{NC}_{\gamma}\text{H}_{\text{Val}}$ ), 27.0 ( $\text{CH}_3$ ), 26.7 (2 x  $\text{CH}_3$ ), 26.3 ( $\text{C}_{\delta}\text{H}_{\text{Leu}}$ ), 26.2 (2 x  $\text{CH}_3$ ), 25.7 ( $\text{CH}_3$ ), 25.4 ( $\text{CH}_3$ ), 24.8 ( $\text{CH}_3$ ), 24.3 ( $\text{CH}_3$ ), 24.1 ( $\text{CH}_3$ ), 23.6 ( $\text{C}_{\delta}\text{H}_{3\text{Leu}}$ ), 23.5 ( $\text{C}_{\delta}\text{H}_{3\text{Leu}}$ ), 23.5 ( $\text{C}_{\delta}\text{H}_{3\text{Leu}}$ ), 22.5 ( $\text{C}_{\delta}\text{H}_{3\text{Leu}}$ ), 19.9 ( $\text{C}_{\delta}\text{H}_{3\text{Val}}$ ), 18.9 ( $\text{C}_{\gamma}\text{H}_{3\text{Ala}}$ ), 18.4 ( $\text{C}_{\delta}\text{H}_{3\text{Val}}$ ). IR (film,  $\text{cm}^{-1}$ ):  $\nu_{\text{max}}$  = 3310, 2972, 1640, 1563;  $[\alpha]_{\text{D}}^{20}$  = + 28 (c = 1.00; MeOH); **Mp**: >200 °C; **HRMS** (ESI<sup>+</sup>):  $m/z$  calcd for  $\text{C}_{44}\text{H}_{86}\text{O}_{10}\text{N}_{15}$   $[\text{M}+\text{H}]^+$  984.6677, found 984.6661.

### Cbz-GlyAib<sub>4</sub>ValOMe 6a

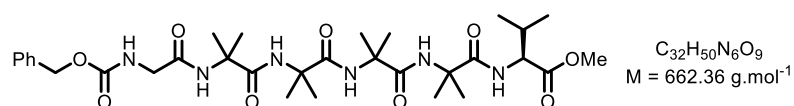

Cbz-GlyAib<sub>4</sub>OH (71 mg, 0.13 mmol) and HOBT hydrate (27 mg, 0.16 mmol) were dissolved in  $\text{CH}_2\text{Cl}_2$  (6 mL) and the solution cooled to 0 °C. EDC (22  $\mu\text{L}$ , 0.13 mmol) was added and the reaction mixture was allowed to warm to room temperature and stirred for 2 h. L-Valine methyl ester hydrochloride (169 mg, 1.01 mmol) and  $\text{NEt}_3$  (0.20 mL, 1.46 mmol) were added and the solution stirred for 48 h. The solution was then diluted with  $\text{CH}_2\text{Cl}_2$  (15 mL) and the organic phase washed with HCl (1 M, 2 x 10 mL),  $\text{NaHCO}_3$  (sat., 2 x 10 mL) and brine (1 x 10 mL). The organic phase was then dried ( $\text{MgSO}_4$ ), filtered and concentrated to give a white solid, which was purified by column chromatography (1-5% MeOH in  $\text{CH}_2\text{Cl}_2$ ) to give the pure peptide (56 mg, 73%) as a white solid.  $^1\text{H-NMR}$  (500 MHz,  $\text{CD}_3\text{OD}$ )  $\delta_{\text{H}}$  7.83 (1H, br s, NH), 7.75 (1H, br s, NH), 7.74 (1H, br s, NH), 7.73 (1H, br s, NH), 7.72 (1H, br s, NH), 7.36 (5H, m, ArCH x5), 5.13 (1H, d,  $J$ =12.5,  $\text{CH}_2\text{O}$ ,  $\text{H}^{\text{A}}$  of AB system),



5.10 (1H, d,  $J=12.5$ , CH<sub>2</sub>O, H<sup>B</sup> of AB system), 4.22 (1H, m, CH), 3.77 (1H, d,  $J=17.0$  Hz, CH<sub>2</sub>-NH, H<sup>A</sup> of AB system), 3.70 (1H, d,  $J=18.0$ , CH<sub>2</sub>-NH, H<sup>B</sup> of AB system), 3.68 (3H, s, OCH<sub>3</sub>), 2.26 (1H, dq,  $J=7.0, 7.0, 7.0$  Hz, CH-(CH<sub>3</sub>)<sub>2</sub>), 1.50 (3H, s, CH<sub>3</sub>), 1.48 (3H, s, CH<sub>3</sub>), 1.43 (3H, s, CH<sub>3</sub>), 1.42 (3H, s, CH<sub>3</sub>), 1.42 (3H, s, CH<sub>3</sub>), 1.40 (3H, s, CH<sub>3</sub>), 1.40 (3H, s, CH<sub>3</sub>), 1.39 (3H, s, CH<sub>3</sub>), 1.02 (3H, d,  $J=7.0$ , CH<sub>3</sub>-CH), 0.97 (3H, d,  $J=7.0$ , CH<sub>3</sub>-CH). <sup>13</sup>C-NMR (126 MHz, CD<sub>3</sub>OD) δ<sub>C</sub> 178.0 (CO), 177.1 (CO), 176.8 (CO), 176.6 (CO), 173.7 (CO), 172.3 (CO), 159.5 (CO (Cbz)), 138.2 (ArC) 129.7 (ArCH), 129.5 (ArCH), 128.9 (ArCH), 67.9 (CH<sub>2</sub>O), 60.3 (CH-NH), 58.2 (°C), 57.97 (°C), 58.02 (°C), 57.7 (°C), 52.4 (OCH<sub>3</sub>), 45.4 (CH<sub>2</sub>-NH), 31.6 (CH), 27.0 (CH<sub>3</sub>), 26.5 (CH<sub>3</sub>), 26.1 (CH<sub>3</sub>), 25.8 (CH<sub>3</sub>), 25.1 (CH<sub>3</sub>), 24.9 (CH<sub>3</sub>), 24.8 (CH<sub>3</sub>), 19.8 (CH<sub>3</sub>-CH), 19.4 (CH<sub>3</sub>-CH). IR (neat) ν<sub>max</sub>/cm<sup>-1</sup> = 3324, 2985, 2476, 1658. [α]<sub>D</sub><sup>20</sup> -23.6 (c 1.0, MeOH). Mp 209-210 °C. HRMS (ES<sup>+</sup>, MeOH) Calc. for C<sub>32</sub>H<sub>51</sub>N<sub>6</sub>O<sub>9</sub> ([M+H]<sup>+</sup>) = 663.3718, found 663.3701.

### Cbz-GlyAib<sub>4</sub>ValNH<sup>t</sup>Bu 6b

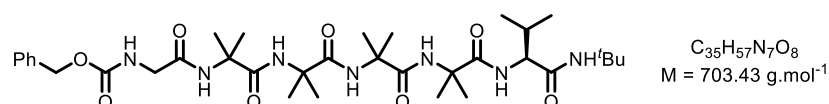

Cbz-Gly-Aib<sub>4</sub>-OH (43 mg, 0.078 mmol) and HOBT hydrate (18 mg, 0.104 mmol) were dissolved in CH<sub>2</sub>Cl<sub>2</sub> (4 mL) and the solution cooled to 0 °C. EDC (14 μL, 0.08 mmol) was added and the reaction mixture was allowed to warm to room temperature and stirred for 1.5 h. L-ValNH<sup>t</sup>Bu (35 mg, 0.2 mmol) in CH<sub>2</sub>Cl<sub>2</sub> (1 mL) and NEt<sub>3</sub> (42 μL, 0.3 mmol) were added and the solution stirred for 48 h. The solution was then diluted with CH<sub>2</sub>Cl<sub>2</sub> (15 mL) and the organic phase washed with KHSO<sub>4</sub> (5%, 2 x 10 mL), NaHCO<sub>3</sub> (sat., 2 x 10 mL) and brine (1 x 10 mL). The organic phase was then dried (MgSO<sub>4</sub>), filtered and concentrated and the crude residue was purified by column chromatography (5% MeOH in CH<sub>2</sub>Cl<sub>2</sub>) to give the pure peptide (18 mg, 33%) as a white solid. <sup>1</sup>H-NMR (500 MHz, CD<sub>3</sub>OD) δ<sub>H</sub> 7.29-7.37 (5H, m, ArCH x5), 7.08 (1H, br s, NH), 5.14 (1H, d,  $J=12.5$ , CH<sub>2</sub>O, H<sup>A</sup> of AB system), 5.09 (1H, d,  $J=12.5$ , CH<sub>2</sub>O, H<sup>B</sup> of AB system), 3.99 (1H, d,  $J=6.0$ , CH), 3.80 (1H, d,  $J=18.0$ , CH<sub>2</sub>-NH, H<sup>A</sup> of AB system), 3.68 (1H, d,  $J=17.0$ , CH<sub>2</sub>-NH, H<sup>B</sup> of AB system), 2.33 (1H, dq,  $J=7.0, 7.0, 6.5$ , CH-(CH<sub>3</sub>)<sub>2</sub>), 1.49 (6H, s, AibCH<sub>3</sub> x2), 1.44 (3H, s, CH<sub>3</sub>), 1.41 (9H, m, CH<sub>3</sub> x3), 1.39 (6H, s, AibCH<sub>3</sub> x2), 1.37 (9H, s, C(CH<sub>3</sub>)<sub>3</sub>). <sup>13</sup>C-NMR (126 MHz, CD<sub>3</sub>OD) δ<sub>C</sub> 178.1 (CO), 177.2 (CO), 177.1 (CO), 176.7 (CO), 173.5 (CO), 172.3 (CO), 159.6 (CO (Cbz)), 138.3 (ArC), 129.7 (ArCH), 129.3 (ArCH), 128.9 (ArCH), 68.0 (CH<sub>2</sub>O), 62.0 (CH-NH), 58.1 (°C), 57.92 (°C), 57.88 (°C) 57.7 (°C), 52.6 (CMe<sub>3</sub>), 45.5 (CH<sub>2</sub>-NH), 31.0 (CH-(CH<sub>3</sub>)<sub>2</sub>), 29.2 (C(CH<sub>3</sub>)<sub>3</sub>), 28.0 (CH<sub>3</sub>), 27.2 (CH<sub>3</sub>), 26.9 (CH<sub>3</sub>), 26.4 (CH<sub>3</sub>), 24.3 (CH<sub>3</sub>), 24.2 (CH<sub>3</sub>), 24.1 (CH<sub>3</sub>), 19.9 (CH<sub>3</sub>-CH), 18.5 (CH<sub>3</sub>-CH). IR (neat) ν<sub>max</sub>/cm<sup>-1</sup> = 3305, 2976, 2474, 1644. [α]<sub>D</sub><sup>20</sup> +14.1 (c 0.5, MeOH). Mp 124-126 °C. HRMS (ES<sup>+</sup>, MeOH) Calc. for C<sub>35</sub>H<sub>57</sub>N<sub>7</sub>NaO<sub>8</sub> ([M+Na]<sup>+</sup>) = 726.4166, found 726.4164.

### Cbz-GlyAib<sub>4</sub>PheO<sup>t</sup>Bu 6c

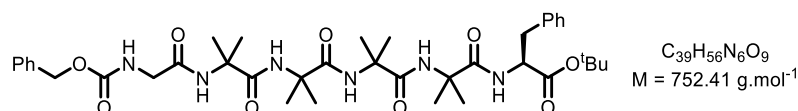

Cbz-Gly-Aib<sub>4</sub>-OH (62 mg, 0.113 mmol) and HOBt hydrate (26 mg, 0.147 mmol) were dissolved in CH<sub>2</sub>Cl<sub>2</sub> (5 mL) and the solution cooled to 0 °C. EDC (20 μL, 0.113 mmol) was added and the reaction mixture was allowed to warm to room temperature and stirred for 1.5 h. L-PheO<sup>t</sup>Bu.HCl (117 mg, 0.45 mmol) and NEt<sub>3</sub> (95 μL, 0.88 mmol) were added and the solution stirred for 48 h. The solution was diluted with CH<sub>2</sub>Cl<sub>2</sub> (15 mL) and the organic phase washed with KHSO<sub>4</sub> (5%, 2 x 10 mL), NaHCO<sub>3</sub> (sat., 2 x 10 mL), brine (1 x 10 mL). The organic phase was then dried (MgSO<sub>4</sub>), filtered and concentrated and the crude residue purified by column chromatography (5% MeOH in CH<sub>2</sub>Cl<sub>2</sub>) to give the pure peptide (58 mg, 68%) as a white solid. <sup>1</sup>H-NMR (500 MHz, CD<sub>3</sub>OD) δ<sub>H</sub> 7.29 (10H, m, ArCH x10), 5.13 (1H, d, *J*=12.5, CH<sub>2</sub>O, H<sup>A</sup> of AB system), 5.10 (1H, d, *J*=12.5, CH<sub>2</sub>O, H<sup>B</sup> of AB system), 4.44 (1H, dd, *J*=7.5, 7.5 Hz, CH), 3.77 (1H, d, *J*=16.5, CH<sub>2</sub>-NH, H<sup>A</sup> of AB system), 3.70 (1H, d, *J*=16.5, CH<sub>2</sub>-NH, H<sup>B</sup> of AB system), 3.15 (1H, dd, *J*=14.0, 7.5, CH<sub>2</sub>-Ph), 3.09 (1H, dd, *J*=14.0, 7.0, CH<sub>2</sub>-Ph) 1.50 (3H, s, CH<sub>3</sub>), 1.46 (3H, s, CH<sub>3</sub>), 1.44 (3H, s, CH<sub>3</sub>), 1.43 (3H, s, CH<sub>3</sub>), 1.42 (3H, s, CH<sub>3</sub>), 1.41 (3H, s, CH<sub>3</sub>), 1.41 (3H, s, CH<sub>3</sub>), 1.40 (3H, s, CH<sub>3</sub>), 1.35 (9H, s, C(CH<sub>3</sub>)<sub>3</sub>). <sup>13</sup>C-NMR (126 MHz, CD<sub>3</sub>OD) δ<sub>C</sub> 177.6 (CO), 177.2 (CO), 176.9 (CO), 176.5 (CO), 172.4 (CO), 172.3 (CO), 159.5 (CO (Cbz)), 139.0 (ArC), 138.3 (ArC), 130.7 (ArCH), 129.7 (ArCH), 129.4 (ArCH), 129.3 (ArCH), 128.9 (ArCH), 127.7 (ArCH), 82.5 (CMe<sub>3</sub>), 67.9 (CH<sub>2</sub>O), 58.14 (°C), 58.10 (°C), 57.9 (°C), 57.7 (°C), 56.9 (°C), 45.4 (CH<sub>2</sub>-NH), 38.6 (CH<sub>2</sub>-Ph), 28.3 (C(CH<sub>3</sub>)<sub>3</sub>), 27.0 (CH<sub>3</sub>), 26.6 (CH<sub>3</sub>), 26.1 (CH<sub>3</sub>), 25.8 (CH<sub>3</sub>), 25.0 (CH<sub>3</sub>), 24.9 (CH<sub>3</sub>), 24.8 (CH<sub>3</sub>). IR (neat) ν<sub>max</sub>/cm<sup>-1</sup> = 3306, 2982, 2934, 1709, 1651. [α]<sub>D</sub><sup>20</sup> -12.0 (c 1.0, MeOH). Mp 200-202 °C. HRMS (ES<sup>+</sup>, MeOH) Calc. for C<sub>39</sub>H<sub>57</sub>N<sub>6</sub>O<sub>9</sub>Na ([M+Na]<sup>+</sup>) = 753.4182, found 753.4178.

### Cbz-GlyAib<sub>4</sub>PheNH<sup>t</sup>Bu 6d

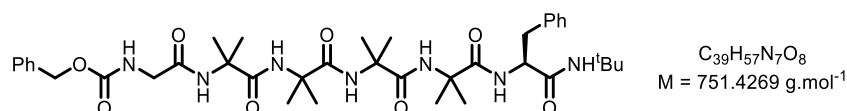

Cbz-Gly-Aib<sub>4</sub>-OH (75 mg, 0.136 mmol) and HOBt hydrate (31 mg, 0.177 mmol) were dissolved in CH<sub>2</sub>Cl<sub>2</sub> (5 mL) and the solution cooled to 0 °C. EDC (24 μL, 0.136 mmol) was added and the reaction mixture was allowed to warm to room temperature and stirred for 1.5 h. H-PheNH<sup>t</sup>Bu (75 mg, 0.34 mmol) and NEt<sub>3</sub> (71 μL, 0.51 mmol) were added and the solution stirred for 48 h. The solution was diluted with CH<sub>2</sub>Cl<sub>2</sub> (15 mL) and the organic phase washed with KHSO<sub>4</sub> (5%, 2 x 10 mL), NaHCO<sub>3</sub> (sat., 2 x 10 mL), brine (1 x 10 mL). The organic phase was then dried (MgSO<sub>4</sub>), filtered and concentrated.

The crude residue was purified by column chromatography (2-5% MeOH in CH<sub>2</sub>Cl<sub>2</sub>) to give the pure peptide (89 mg, 87%) as a white solid. <sup>1</sup>H-NMR (500 MHz, CD<sub>3</sub>OD) δ<sub>H</sub> 7.13-7.38 (10H, m, ArCH x10), 5.14 (1H, d, *J*=12.5, CH<sub>2</sub>O, H<sup>A</sup> of AB system), 5.09 (1H, d, *J*=12.5, CH<sub>2</sub>O, H<sup>B</sup> of AB system), 4.37 (1H, dd, *J*=11.5, 3.0, CH-NH), 3.80 (1H, d, *J*=16.5, CH<sub>2</sub>-NH, H<sup>A</sup> of AB system), 3.69 (1H, d, *J*=16.5, CH<sub>2</sub>-NH, H<sup>B</sup> of AB system), 3.41 (1H, m, CH<sub>2</sub>-Ph), 2.92 (1H, m, CH<sub>2</sub>-Ph), 1.37-1.46 (30H, m, CH<sub>3</sub> x7 and C(CH<sub>3</sub>)<sub>3</sub>), 1.18 (3H, s, CH<sub>3</sub>). <sup>13</sup>C-NMR (126 MHz, CD<sub>3</sub>OD) δ<sub>C</sub> 177.8 (CO), 177.6 (CO), 177.4 (CO), 176.6 (CO), 173.4 (CO), 172.3 (CO), 159.6 (CO (Cbz)), 140.0 (ArC), 138.8 (ArC), 130.3 (ArCH), 129.7 (ArCH), 129.4 (ArCH), 129.3 (ArCH), 128.9 (ArCH), 127.6 (ArCH), 68.0 (CH<sub>2</sub>O), 58.1 (°C), 57.9 (°C), 57.6 (°C), 57.5 (CH-NH), 52.8 (CMe<sub>3</sub>), 45.4 (CH<sub>2</sub>-NH), 38.2 (CH<sub>2</sub>-Ph), 29.2 (C(CH<sub>3</sub>)<sub>3</sub>), 27.4 (CH<sub>3</sub>), 27.2 (CH<sub>3</sub>), 26.9 (CH<sub>3</sub>), 26.4 (CH<sub>3</sub>), 24.3 (CH<sub>3</sub>), 23.9 (CH<sub>3</sub>). IR (neat) ν<sub>max</sub>/cm<sup>-1</sup> = 3303, 2983, 2936, 1729, 1651, 1530, 1455. [α]<sub>D</sub><sup>20</sup> +12.0 (c 1.0, MeOH). Mp 122-124 °C. HRMS (ES<sup>+</sup>, MeOH) Calc. for C<sub>39</sub>H<sub>57</sub>N<sub>6</sub>O<sub>9</sub>Na ([M+Na]<sup>+</sup>) = 751.4269, found 751.4277.

#### CbzGly-Aib<sub>4</sub>-(Val<sup>u</sup>)<sub>rev</sub>-NHBoc 7a

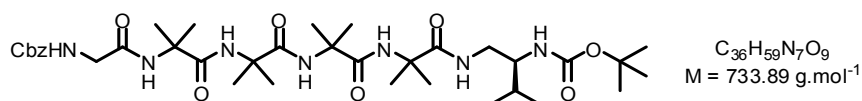

**7a** was prepared from CbzGly-Aib-OH (480 mg, 0.87 mmol), HOBt (173 mg, 1.13 mmol), EDC (169 μL, 0.96 mmol), DIPEA (223 μL, 1.31 mmol) and an amine (265 mg, 1.31 mmol)<sup>1</sup> as described in the general procedure A. The pure oligomer **7a** (422 mg, 70%) was isolated as a white solid. <sup>1</sup>H NMR (500 MHz, CD<sub>3</sub>OH) δ = 7.86 (1H, s, NH), 7.76 (1H, s, NH), 7.70 (1H, s, NH), 7.61 (1H, s, NH), 7.50 (1H, s, NH<sub>Val</sub>), 7.38-7.24 (5H, m, 5 x =CH<sub>Ar</sub>), 6.62 (1H, d, *J* = 10.1, NH<sub>Val</sub>), 6.05 (1H, d, *J* = 8.2, NH), 5.11 (2H, s, OCH<sub>2</sub>), 3.75 (1H, d, *J* = 17.8, A part of AB pattern, NCH<sub>A</sub>H<sub>BGly</sub>), 3.72 (1H, d, *J* = 17.1, B part of AB pattern, NCH<sub>A</sub>H<sub>BVal</sub>), 3.63-3.52 (1H, m, NCH<sub>A</sub>H<sub>BVal</sub>), 3.48-3.39 (1H, m, NCH<sub>Val</sub>), 3.17-3.06 (1H, m, NCH<sub>A</sub>H<sub>BVal</sub>), 1.85 (1H, oct, *J* = 7.5, CH<sub>Val</sub>), 1.51-1.31 (33H, m, 8 x CH<sub>3</sub> and C(CH<sub>3</sub>)<sub>3</sub>), 0.90 (3H, d, *J* = 7.0, CH<sub>3Val</sub>), 0.89 (3H, d, *J* = 7.1, CH<sub>3Val</sub>). <sup>13</sup>C NMR (125 MHz, CD<sub>3</sub>OH) δ = 177.8 (C=O), 177.6 (C=O), 176.6 (C=O), 176.4 (C=O), 172.1 (C=O), 159.3 (C=O), 158.1 (C=O), 138.1 (=C<sub>Ar</sub>), 129.4 (2 x =CH<sub>Ar</sub>), 129.0 (=CH<sub>Ar</sub>), 128.6 (2 x =CH<sub>Ar</sub>), 79.7 (C-O), 67.7 (OCH<sub>2</sub>), 58.3 (C), 58.0 (C), 57.8 (C), 57.5 (C), 57.1 (NC<sub>β</sub>H<sub>Val</sub>), 45.2 (NCH<sub>2Gly</sub>), 42.5 (NC<sub>α</sub>H<sub>2Val</sub>), 30.4 (NC<sub>γ</sub>H<sub>Val</sub>), 28.7 (C(CH<sub>3</sub>)<sub>3</sub>), 26.2 (CH<sub>3</sub>), 25.6 (CH<sub>3</sub>), 25.5 (CH<sub>3</sub>), 25.2 (2 x CH<sub>3</sub>), 24.9 (CH<sub>3</sub>), 19.9 (C<sub>δ</sub>H<sub>3Val</sub>), 19.2 (C<sub>δ</sub>H<sub>3Val</sub>). IR (film, cm<sup>-1</sup>): ν<sub>max</sub> = 3344, 2965, 2930, 2907, 1632, 1571; [α]<sub>D</sub><sup>20</sup> = -76 (c = 1.00; MeOH); Mp: 89-91 °C; HRMS (ESI<sup>+</sup>): *m/z* calcd for C<sub>36</sub>H<sub>60</sub>N<sub>7</sub>O<sub>9</sub> [M+H]<sup>+</sup> 734.4447, found 734.4446.

**CbzGly-Aib<sub>4</sub>-(Val<sup>u</sup>)<sub>rev</sub>-(Ala<sup>u</sup>)<sub>rev</sub>-NH<sub>2</sub>Boc **7b****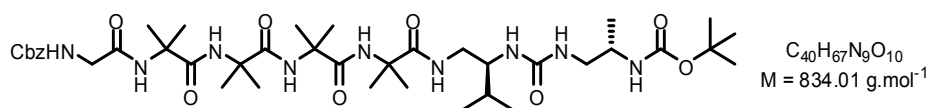

**7b** was prepared from **7a** (385 mg, 0.52 mmol), **Cb** (164 mg, 0.52 mmol) and DIPEA (172  $\mu$ L, 1.57 mmol) as described in the general procedure B. The pure oligomer **7b** (300 mg, 69.2%) was isolated as a white solid.  $^1\text{H NMR}$  (500 MHz,  $\text{CD}_3\text{OH}$ )  $\delta = 7.79$  (1H, s, NH), 7.74 (1H, s, NH), 7.72 (1H, s, NH), 7.47 (1H, t,  $J = 5.4$ ,  $\text{NH}_{\text{Val}}$ ), 7.38-7.26 (5H, m,  $5 \times =\text{CH}_{\text{Ar}}$ ), 6.46 (1H, d,  $J = 7.0$ ,  $\text{NH}_{\text{Ala}}$ ), 5.94-5.87 (2H, m,  $\text{NH}_{\text{Val}}$  and  $\text{NH}_{\text{Ala}}$ ), 5.10 (2H, s,  $\text{OCH}_2$ ), 3.75 (1H, d,  $J = 17.0$ , A part of AB pattern,  $\text{NCH}_A\text{H}_{\text{BGly}}$ ), 3.72 (1H, d,  $J = 17.3$ , B part of AB pattern,  $\text{NCH}_A\text{H}_{\text{BGly}}$ ), 3.67-3.52 (2H, m,  $\text{NCH}_{\text{Val}}$  and  $\text{NCH}_{\text{Ala}}$ ), 3.41-3.33 (1H, m,  $\text{NCH}_A\text{H}_{\text{BVal}}$ ), 3.32-3.23 (1H, m,  $\text{NCH}_A\text{H}_{\text{BVal}}$ ), 3.17-3.05 (2H, m,  $\text{NCH}_2\text{Ala}$ ), 1.88 (1H, oct,  $J = 6.7$ ,  $\text{CH}_{\text{Val}}$ ), 1.50-1.35 (33H, m,  $8 \times \text{CH}_3$  and  $\text{C}(\text{CH}_3)_3$ ), 1.07 (3H, d,  $J = 6.7$ ,  $\text{CH}_3\text{Ala}$ ), 0.93 (3H, d,  $J = 6.8$ ,  $\text{CH}_3\text{Val}$ ), 0.90 (3H, d,  $J = 6.9$ ,  $\text{CH}_3\text{Val}$ ).  $^{13}\text{C NMR}$  (125 MHz,  $\text{CD}_3\text{OH}$ )  $\delta = 177.8$  (C=O), 177.4 (C=O), 176.8 (C=O), 176.5 (C=O), 172.1 (C=O), 161.0 (C=O), 159.3 (C=O), 157.9 (C=O), 138.0 ( $=\text{C}_{\text{Ar}}$ ), 129.4 ( $2 \times =\text{CH}_{\text{Ar}}$ ), 129.0 ( $=\text{CH}_{\text{Ar}}$ ), 128.6 ( $2 \times =\text{CH}_{\text{Ar}}$ ), 79.8 (C-O), 67.7 ( $\text{OCH}_2$ ), 58.2 (C), 57.9 (C), 57.8 (C), 57.6 (C), 56.2 ( $\text{NC}_{\beta}\text{H}_{\text{Val}}$ ), 48.5 ( $\text{NC}_{\beta}\text{H}_{\text{Ala}}$ ), 46.0 ( $\text{NC}_{\alpha}\text{H}_2\text{Ala}$ ), 45.2 ( $\text{NCH}_2\text{Gly}$ ), 42.4 ( $\text{NC}_{\alpha}\text{H}_2\text{Val}$ ), 30.4 ( $\text{NC}_{\gamma}\text{H}_{\text{Val}}$ ), 28.7 ( $\text{C}(\text{CH}_3)_3$ ), 26.2 ( $\text{CH}_3$ ), 25.6 ( $\text{CH}_3$ ), 25.4 ( $\text{CH}_3$ ), 25.2 ( $2 \times \text{CH}_3$ ), 25.0 ( $\text{CH}_3$ ), 20.1 ( $\text{C}_{\delta}\text{H}_3\text{Val}$ ), 18.6 ( $\text{C}_{\delta}\text{H}_3\text{Val}$ ), 18.5 ( $\text{C}_{\delta}\text{H}_3\text{Ala}$ ). IR (film,  $\text{cm}^{-1}$ ):  $\nu_{\text{max}} = 3309, 2977, 2938, 1656, 1537$ ;  $[\alpha]_{\text{D}}^{20} = -124$  ( $c = 1.00$ ; MeOH); **Mp**: 129-131  $^{\circ}\text{C}$ ; **HRMS** (ESI<sup>+</sup>):  $m/z$  calcd for  $\text{C}_{40}\text{H}_{68}\text{N}_9\text{O}_{10}$   $[\text{M}+\text{H}]^+$  834.5084, found 834.5083.

**CbzGly-Aib<sub>4</sub>-(Val<sup>u</sup>)<sub>rev</sub>-(Ala<sup>u</sup>)<sub>rev</sub>-(Leu<sup>u</sup>)<sub>rev</sub>-NH<sub>2</sub>Boc **7c****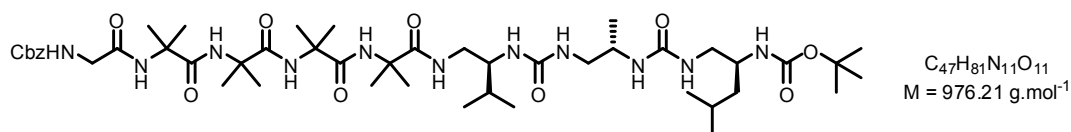

**7c** was prepared from **7b** (250 mg, 0.30 mmol), **Ca** (107 mg, 0.30 mmol) and DIPEA (153  $\mu$ L, 0.90 mmol) as described in the general procedure B. The pure oligomer **7c** (249 mg, 85.1%) was isolated as a white solid.  $^1\text{H NMR}$  (500 MHz,  $\text{CD}_3\text{OH}$ )  $\delta = 8.34$  (1H, s, NH), 7.77 (1H, s, NH), 7.74 (1H, s, NH), 7.52 (1H, t,  $J = 5.4$ ,  $\text{NH}_{\text{Val}}$ ), 7.42 (1H, s, NH), 7.37-7.26 (5H, m,  $5 \times =\text{CH}_{\text{Ar}}$ ), 6.36 (1H, d,  $J = 6.8$ ,  $\text{NH}_{\text{Leu}}$ ), 5.98-5.87 (3H, m,  $\text{NH}_{\text{Leu}}$ ,  $\text{NH}_{\text{Ala}}$  and  $\text{NH}_{\text{Ala}}$ ), 5.81 (1H, d,  $J = 6.8$ ,  $\text{NH}_{\text{Val}}$ ), 5.10 (2H, s,  $\text{OCH}_2$ ), 3.76 (1H, d,  $J = 15.4$ , A part of AB pattern,  $\text{NCH}_A\text{H}_{\text{BGly}}$ ), 3.71 (1H, d,  $J = 16.9$ , B part of AB pattern,  $\text{NCH}_A\text{H}_{\text{BGly}}$ ), 3.77-3.68 (1H, m,  $\text{NCH}_{\text{Ala}}$ ), 3.66-3.52 (2H, m,  $\text{NCH}_{\text{Val}}$  and  $\text{NCH}_{\text{Leu}}$ ), 3.51-3.39 (1H, m,  $\text{NCH}_A\text{H}_{\text{BVal}}$ ), 3.32-3.22 (2H, m,  $\text{NCH}_A\text{H}_{\text{BVal}}$  and  $\text{NCH}_A\text{H}_{\text{BAla}}$ ), 3.20-3.16 (1H, m,  $\text{NCH}_A\text{H}_{\text{BLeu}}$ ), 3.07-2.97 (2H, m,  $\text{NCH}_A\text{H}_{\text{BLeu}}$  and

$NCH_{\alpha}H_{\beta}Ala$ ), 1.90 (1H, oct,  $J = 7.0$ ,  $CH_{Val}$ ), 1.65 (1H, non,  $J = 7.1$ ,  $CH_{Leu}$ ), 1.50-1.35 (33H, m, 8 x  $CH_3$  and  $C(CH_3)_3$ ), 1.34-1.28 (1H, m,  $CH_{\alpha}H_{\beta}Leu$ ), 1.24-1.19 (1H, m,  $CH_{\alpha}H_{\beta}Leu$ ), 1.08 (3H, d,  $J = 6.8$ ,  $CH_{3Ala}$ ), 0.93 (3H, d,  $J = 6.8$ ,  $CH_{3Val}$ ), 0.92 (3H, d,  $J = 7.2$ ,  $CH_{3Leu}$ ), 0.90 (3H, d,  $J = 7.6$ ,  $CH_{3Leu}$ ), 0.89 (3H, d,  $J = 6.8$ ,  $CH_{3Val}$ ).  $^{13}C$  NMR (125 MHz,  $CD_3OH$ )  $\delta = 177.9$  (C=O), 177.3 (C=O), 176.9 (C=O), 176.5 (C=O), 172.2 (C=O), 161.0 (C=O), 160.8 (C=O), 159.3 (C=O), 158.2 (C=O), 138.0 (=C<sub>Ar</sub>), 129.4 (2 x =CH<sub>Ar</sub>), 129.0 (=CH<sub>Ar</sub>), 128.6 (2 x =CH<sub>Ar</sub>), 79.7 (C-O), 67.7 (OCH<sub>2</sub>), 58.2 (C), 57.9 (C), 57.8 (C), 57.6 (C), 56.3 (NC $\beta$ H<sub>Val</sub>), 50.5 (NC $\beta$ H<sub>Leu</sub>), 47.5 (NC $\beta$ H<sub>Ala</sub>), 46.3 (NC $\square$ H<sub>2Ala</sub>), 45.5 (NC $\square$ H<sub>2Leu</sub>), 45.3 (NCH<sub>2Gly</sub>), 42.6 (C $\square$ H<sub>2Leu</sub>), 41.9 (NC $\square$ H<sub>2Val</sub>), 30.0 (C $\gamma$ H<sub>Val</sub>), 28.7 (C(CH<sub>3</sub>)<sub>3</sub>), 26.5 (CH<sub>3</sub>), 25.9 (C $\delta$ H<sub>Leu</sub>), 25.6 (CH<sub>3</sub>), 25.4 (CH<sub>3</sub>), 25.0 (CH<sub>3</sub>), 24.9 (2 x CH<sub>3</sub>), 23.5 (C $\delta$ H<sub>3Leu</sub>), 22.4 (C $\delta$ H<sub>3Leu</sub>), 20.2 (C $\delta$ H<sub>3Val</sub>), 19.0 (C $\delta$ H<sub>3Ala</sub>), 18.6 (C $\delta$ H<sub>3Val</sub>). IR (film,  $cm^{-1}$ ):  $\nu_{max} = 3304, 2932, 2873, 1655, 1536$ ;  $[\alpha]_D^{20} = -14$  (c = 1.00; MeOH); **mp**: 135-136 °C; **HRMS** (ESI<sup>+</sup>):  $m/z$  calcd for  $C_{47}H_{82}N_{11}O_{11}$  [M+H]<sup>+</sup> 976.6190, found 976.6189.

### CbzGly-(Val<sup>u</sup>)<sub>rev</sub>-(Ala<sup>u</sup>)<sub>rev</sub>-(Leu<sup>u</sup>)<sub>rev</sub>-(Val<sup>u</sup>)<sub>rev</sub>-NH<sub>Boc</sub> **7d**

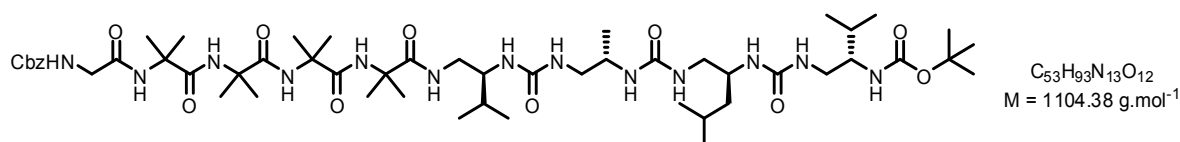

**7d** was prepared from **7c** (150 mg, 0.15 mmol), **Cc** (53 mg, 0.15 mmol) and DIPEA (79  $\mu$ L, 0.46 mmol) as described in the general procedure B. The pure oligomer **7d** (40 mg, 21.6%) was isolated as a white solid.  $^1H$  NMR (500 MHz,  $CD_3OH$ )  $\delta = 8.35$  (1H, s, NH), 7.80-7.70 (3H, m, NH), 7.62 (1H, t,  $J = 5.4$ ,  $NH_{Val}$ ), 7.52 (1H, s, NH), 7.43 (1H, t,  $J = 5.4$ ,  $NH_{Gly}$ ), 7.42 (1H, s, NH), 7.39-7.28 (5H, m, 5 x =CH<sub>Ar</sub>), 6.44 (1H, d,  $J = 6.8$ ,  $NH_{Leu}$ ), 6.27 (1H, s,  $NH_{Ala}$ ), 6.10-5.75 (4H, m,  $NH_{Val}$ ,  $NH_{Leu}$ ,  $NH_{Val}$  and  $NH_{Ala}$ ), 5.12 (2H, s, OCH<sub>2</sub>), 3.96-3.37 (8H, m,  $NCH_{Val}$ ,  $NCH_{Leu}$ ,  $NCH_{Ala}$ ,  $NCH_{\alpha}H_{\beta}Val$ ,  $NCH_{\alpha}H_{\beta}Val$ ,  $NCH_{\alpha}H_{\beta}Ala$  and  $NCH_{\alpha}H_{\beta}Leu$ ), 3.78 (1H, d,  $J = 19.4$ , A part of AB pattern,  $NCH_{\alpha}H_{\beta}Gly$ ), 3.78 (1H, d,  $J = 19.8$ , B part of AB pattern,  $NCH_{\alpha}H_{\beta}Gly$ ), 3.28-3.11 (1H, m,  $NCH_{\alpha}H_{\beta}Val$ ), 2.99-2.47 (3H, m,  $NCH_{\alpha}H_{\beta}Val$ ,  $NCH_{\alpha}H_{\beta}Ala$  and  $NCH_{\alpha}H_{\beta}Leu$ ), 1.95 (1H, oct,  $J = 7.0$ ,  $CH_{Val}$ ), 1.75-1.62 (2H, m,  $CH_{Val}$  and  $CH_{Leu}$ ), 1.52-1.35 (35H, m, 8 x  $CH_3$  and  $C(CH_3)_3$  and  $CH_{2Leu}$ ), 1.09 (3H, d,  $J = 6.8$ ,  $CH_{3Ala}$ ), 0.98-0.86 (18H, m, 4 x  $CH_{3Val}$  and 2 x  $CH_{3Leu}$ ).  $^{13}C$  NMR (125 MHz,  $CD_3OH$ )  $\delta = 178.0$  (C=O), 177.3 (C=O), 177.0 (C=O), 176.6 (C=O), 175.0 (C=O), 172.3 (C=O), 161.1 (C=O), 161.0 (C=O), 159.4 (C=O), 159.1 (C=O), 138.2 (=C<sub>Ar</sub>), 129.6 (2 x =CH<sub>Ar</sub>), 129.1 (=CH<sub>Ar</sub>), 128.8 (2 x =CH<sub>Ar</sub>), 80.0 (C-O), 67.8 (OCH<sub>2</sub>), 58.3 (C), 58.0 (C), 57.9 (C), 57.7 (C and NC $\beta$ H<sub>Val</sub>), 56.1 (NC $\beta$ H<sub>Val</sub>), 49.5 (NC $\beta$ H<sub>Leu</sub>), 47.4 (NC $\beta$ H<sub>Ala</sub>), 46.6 (NC $\square$ H<sub>2Leu</sub>), 46.5 (NC $\square$ H<sub>2Ala</sub>), 45.4 (NCH<sub>2Gly</sub>), 43.4 (NC $\square$ H<sub>2Val</sub>), 43.0 (C $\square$ H<sub>2Leu</sub>), 42.3 (NC $\square$ H<sub>2Val</sub>), 31.9 (C $\gamma$ H<sub>Val</sub>), 29.7 (C $\gamma$ H<sub>Val</sub>), 28.9 (C(CH<sub>3</sub>)<sub>3</sub>), 26.6 (CH<sub>3</sub>), 26.1 (C $\delta$ H<sub>Leu</sub>), 26.0 (CH<sub>3</sub>), 25.6 (CH<sub>3</sub>), 25.5 (CH<sub>3</sub>), 25.1 (2 x CH<sub>3</sub>), 23.8 (C $\delta$ H<sub>3Leu</sub>), 22.6 (C $\delta$ H<sub>3Leu</sub>), 20.6 (C $\delta$ H<sub>3Val</sub>), 20.1 (C $\delta$ H<sub>3Val</sub>),

19.2 ( $C_{\delta}H_{3Ala}$ ), 18.8 ( $C_{\delta}H_{3Val}$ ), 18.1 ( $C_{\delta}H_{3Val}$ ). IR (film,  $cm^{-1}$ ):  $\nu_{max}$  = 3312, 2945, 1649, 1528;  $[\alpha]_D^{20}$  = -16 (c = 1.00; MeOH); **Mp**: 159-161 °C; **HRMS** ( $ES^+$ ):  $m/z$  calcd for  $C_{53}H_{93}N_{13}O_{12}Na$   $[M+Na]^+$  1126.99.

**CbzGly-Aib<sub>4</sub>-(Val<sup>u</sup>)<sub>rev</sub>-(Ala<sup>u</sup>)<sub>rev</sub>-(Leu<sup>u</sup>)<sub>rev</sub>-(Val<sup>u</sup>)<sub>rev</sub>-NH(CO)NH*i*Pr **7e****

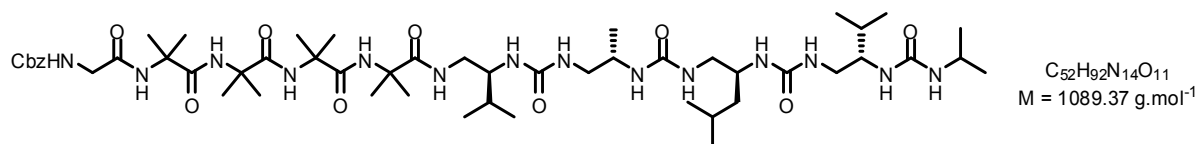

**7e** was prepared from **7d** (36 mg, 0.03 mmol), isopropyl isocyanate (6.4  $\mu$ L, 0.07 mmol) and DIPEA (13.6  $\mu$ L, 0.10 mmol) as described in the general procedure C. The pure oligomer **7e** (32 mg, 89.8%) was isolated as a white solid. **<sup>1</sup>H NMR** (500 MHz,  $CD_3OH$ )  $\delta$  = 8.34 (1H, s, NH), 7.80-7.70 (3H, m, NH), 7.57 (1H, t,  $J$  = 6.5,  $NH_{Val}$ ), 7.40-7.24 (5H, m, 5 x = $CH_{Ar}$ ), 6.16 (1H, s,  $NH_{Leu}$ ), 6.07 (1H, d,  $J$  = 8.8,  $NH_{Leu}$ ), 6.03-5.96 (1H, d,  $J$  = 3.9,  $NH_{iPr}$ ), 5.96-5.78 (4H, m,  $NH_{Val}$ ,  $NH_{Ala}$ ,  $NH_{Val}$  and  $NH_{Ala}$ ), 5.69 (1H, d,  $J$  = 9.7,  $NH_{Val}$ ), 5.11 (2H, s,  $OCH_2$ ), 3.90-3.66 (3H, m,  $NCH_{Val}$ ,  $NCH_{Leu}$ ,  $NCH_{Val}$ ) 3.76 (1H, d,  $J$  = 16.6, A part of AB pattern,  $NCH_AH_{BGly}$ ), 3.71 (1H, d,  $J$  = 16.6, B part of AB pattern,  $NCH_AH_{BGly}$ ), 3.64-3.38 (6H, m,  $NCH_AH_{BVal}$ ,  $NCH_AH_{BVal}$ ,  $NCH_AH_{BAla}$ ,  $NCH_AH_{BLeu}$ ,  $NCH_{Val}$ ,  $NCH_{iPr}$ ), 3.22-3.11 (1H, m,  $NCH_AH_{BVal}$ ), 2.99-2.88 (1H, m,  $NCH_AH_{BVal}$ ), 2.87-2.77 (1H, m,  $NCH_AH_{BLeu}$ ), 2.76-2.65 (1H, m,  $NCH_AH_{BAla}$ ), 1.93 (1H, oct,  $J$  = 6.9,  $CH_{Val}$ ), 1.77-1.59 (2H, m,  $CH_{Val}$  and  $CH_{Leu}$ ), 1.49 (3H, s,  $CH_3$ ), 1.48 (3H, s,  $CH_3$ ), 1.47-1.33 (18H, m, 6 x  $CH_3$  and  $C(CH_3)_3$ ), 1.33-1.14 (2H, m,  $CH_{2Leu}$ ), 1.11 (6H, d,  $J$  =,  $NCH(CH_3)_2$ ), 1.07 (3H, d,  $J$  = 6.9,  $CH_{3Ala}$ ), 0.7-0.86 (18H, m, 4 x  $CH_{3Val}$  and 2 x  $CH_{3Leu}$ ). **<sup>13</sup>C NMR** (125 MHz,  $CD_3OH$ )  $\delta$  = 177.9 (C=O), 177.1 (C=O), 176.9 (C=O), 176.5 (C=O), 175.9 (C=O), 175.7 (C=O), 172.2 (C=O), 161.1 (C=O), 161.0 (C=O), 160.7 (C=O), 159.3 (C=O), 138.1 (=C<sub>Ar</sub>), 129.4 (2 x =C<sub>Ar</sub>), 129.0 (=C<sub>Ar</sub>), 128.6 (2 x =C<sub>Ar</sub>), 67.7 ( $OCH_2$ ), 58.2 (C), 57.9 (C), 57.8 (C), 57.6 (C), 56.3 ( $NC_{\beta}H_{Val}$ ), 49.9 ( $NC_{\beta}H_{Leu}$ ), 47.3 ( $NC_{\beta}H_{Ala}$ ), 45.9 ( $NC_{\alpha}H_{2Leu}$ ), 45.7 ( $NCH_{iPr}$ ), 45.3 ( $NC_{\alpha}H_{2Ala}$ ), 43.3 ( $NCH_{2Gly}$ ), 42.8 ( $NC_{\alpha}H_{2Val}$ ), 42.7 ( $C_{\alpha}H_{2Leu}$ ), 41.9 ( $NC_{\alpha}H_{2Val}$ ), 31.7 ( $C_{\gamma}H_{Val}$ ), 29.7 ( $C_{\gamma}H_{Val}$ ), 26.6 ( $CH_3$ ), 25.9 ( $C_{\delta}H_{Leu}$ ), 25.6 ( $CH_3$ ), 25.4 ( $CH_3$ ), 25.3 ( $CH_3$ ), 25.0 ( $CH_3$ ), 24.8 ( $CH_3$ ), 23.6 ( $C_{\delta}H_{3Leu}$ ), 23.5 (2 x  $CH_{3iPr}$ ), 23.5 ( $C_{\delta}H_{3Leu}$ ), 20.4 ( $C_{\delta}H_{3Val}$ ), 20.0 ( $C_{\delta}H_{3Val}$ ), 18.9 ( $C_{\delta}H_{3Ala}$ ), 18.6 ( $C_{\delta}H_{3Val}$ ), 18.4 ( $C_{\delta}H_{3Val}$ ). IR (film,  $cm^{-1}$ ):  $\nu_{max}$  = 3316, 2971, 2871, 1643, 1549;  $[\alpha]_D^{20}$  = +49.6 (c = 1.00; MeOH); **Mp**: 190-192 °C; **HRMS** ( $ES^+$ ):  $m/z$  calcd for  $C_{52}H_{92}N_{14}O_{11}Na$   $[M+H]^+$  1111.8.

### CbzGly-Aib<sub>4</sub>-(Val<sup>u</sup>)-NH(CO)NH*i*Pr **8a**

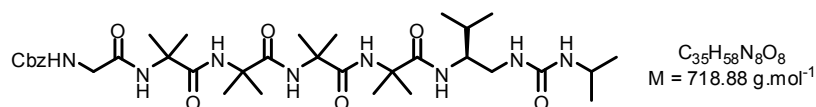

**8a** was prepared from CbzGly-Aib-OH (200 mg, 0.36 mmol), HOBT (72 mg, 0.47 mmol), EDC.HCl (76 mg, 0.40 mmol), DIPEA (92  $\mu$ L, 0.55 mmol) and **U1** (250 mg, 0.55 mmol) as described in the general procedure A. The pure oligomer **8a** (176 mg, 68%) was isolated as a white solid.  $^1\text{H NMR}$  (500 MHz,  $\text{CD}_3\text{OH}$ )  $\delta$  = 7.82-7.59 (5H, m, NH), 7.40-7.26 (5H, m, 5 x =CH<sub>Ar</sub>), 7.24 (1H, d,  $J$  = 9.7, CHNH<sub>Val</sub>), 5.59 (1H, d,  $J$  = 8.0, NH<sub>*i*Pr</sub>), 5.54 (1H, d,  $J$  = 6.5, CH<sub>2</sub>NH<sub>Val</sub>), 5.14 (1H, d,  $J$  = 12.6, A part of AB pattern, OCH<sub>A</sub>H<sub>B</sub>), 5.08 (1H, d,  $J$  = 12.6, B part of AB pattern, OCH<sub>A</sub>H<sub>B</sub>), 3.80 (1H, d,  $J$  = 16.5, A part of AB pattern, NCH<sub>A</sub>H<sub>BGly</sub>), 3.67 (1H, d,  $J$  = 16.8, B part of AB pattern, NCH<sub>A</sub>H<sub>BGly</sub>), 3.89-3.56 (3H, m, NCH<sub>*i*Pr</sub>, NCH<sub>A</sub>H<sub>BVal</sub> and NCH<sub>Val</sub>), 3.07-2.93 (1H, m, NCH<sub>A</sub>H<sub>BVal</sub>), 1.75 (1H, oct,  $J$  = 6.94, CH<sub>Val</sub>), 1.54-1.47 (6H, m, 2 x CH<sub>3</sub>), 1.46-1.30 (18H, m, 6 x CH<sub>3</sub>), 1.12 (3H, d,  $J$  = 6.7, CH<sub>3*i*Pr</sub>), 1.10 (3H, d,  $J$  = 6.8, CH<sub>3*i*Pr</sub>), 0.95 (3H, d,  $J$  = 6.9, CH<sub>3Val</sub>), 0.92 (3H, d,  $J$  = 6.9, CH<sub>3Val</sub>).  $^{13}\text{C NMR}$  (125 MHz,  $\text{CD}_3\text{OH}$ )  $\delta$  = 177.7 (C=O), 177.5 (C=O), 177.3 (C=O), 176.6 (C=O), 172.2 (C=O), 160.4 (C=O), 159.3 (C=O), 138.0 (=C<sub>Ar</sub>), 129.4 (2 x =CH<sub>Ar</sub>), 129.0 (=CH<sub>Ar</sub>), 128.6 (2 x =CH<sub>Ar</sub>), 67.7 (OCH<sub>2</sub>), 58.4 (C), 57.8 (C), 57.7 (C), 57.6 (C), 56.7 (NC <sub>$\beta$</sub> H<sub>Val</sub>), 45.3 (NCH<sub>2Gly</sub>), 42.9 (NCH<sub>*i*Pr</sub>), 42.5 (NC <sub>$\alpha$</sub> H<sub>2Val</sub>), 32.1 (NC <sub>$\gamma$</sub> H<sub>Val</sub>), 27.2 (CH<sub>3</sub>), 26.9 (CH<sub>3</sub>), 26.5 (CH<sub>3</sub>), 26.2 (CH<sub>3</sub>), 25.1 (CH<sub>3</sub>), 24.0 (CH<sub>3</sub>), 23.9 (CH<sub>3</sub>), 23.7 (CH<sub>3</sub>), 23.5 (CH<sub>*i*Pr</sub>), 23.4 (CH<sub>*i*Pr</sub>), 19.9 (C <sub>$\delta$</sub> H<sub>3Val</sub>), 19.0 (C <sub>$\delta$</sub> H<sub>3Val</sub>). IR (film,  $\text{cm}^{-1}$ ):  $\nu_{\text{max}}$  = 3304, 2975, 2937, 2873, 1645, 1530;  $[\alpha]_{\text{D}}^{20}$  = +27.6 ( $c$  = 1.00; MeOH); **Mp**: 120-122 °C; **HRMS** (ESI<sup>+</sup>):  $m/z$  calcd for  $C_{35}H_{59}N_8O_8$  [M+H]<sup>+</sup> 719.4456, found 719.4427.

### CbzGly-Aib<sub>4</sub>-Val<sup>u</sup>-Ala<sup>u</sup>-NH(CO)NH*i*Pr **8b**

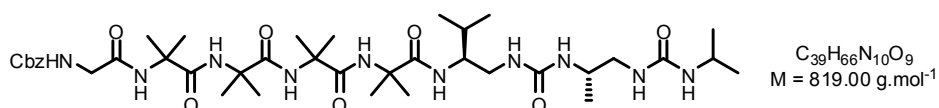

**8b** was prepared from CbzGly-Aib-OH (200 mg, 0.36 mmol), HOBT (72 mg, 0.47 mmol), EDC.HCl (76 mg, 0.40 mmol), DIPEA (92  $\mu$ L, 0.55 mmol) and **U4** (300 mg, 0.55 mmol) as described in the general procedure A. The pure oligomer **8b** (177 mg, 60%) was isolated as a white solid.  $^1\text{H NMR}$  (500 MHz,  $\text{CD}_3\text{OH}$ )  $\delta$  = 7.86 (2H, s, NH), 7.80 (2H, s, NH), 7.78 (1H, brs, NH), 7.42-7.25 (5H, m, 5 x =CH<sub>Ar</sub>), 7.16 (1H, d,  $J$  = 10.1, NH<sub>Val</sub>), 6.07 (1H, d,  $J$  = 7.9, NH<sub>*i*Pr</sub>), 5.88 (1H, dd,  $J$  = 7.9 and 3.4, NH<sub>Ala</sub>), 5.61 (1H, s, NH<sub>Ala</sub>), 5.59 (1H, s, NH<sub>Val</sub>), 5.15 (1H, d,  $J$  = 12.6, A part of AB pattern, OCH<sub>A</sub>H<sub>B</sub>), 5.08 (1H, d,  $J$  = 12.5, B part of AB pattern, OCH<sub>A</sub>H<sub>B</sub>), 3.98-3.76 (3H, m, NCH<sub>*i*Pr</sub>, NCH<sub>Val</sub> and NCH<sub>Ala</sub>), 3.81 (1H, d,  $J$  = 16.7, A part

of AB pattern,  $NCH_AH_{BGly}$ , 3.67 (1H, d,  $J = 16.3$ , B part of AB pattern,  $NCH_AH_{BGly}$ ), 3.72-3.59 (1H, m,  $NCH_AH_{BVal}$ ), 3.47 (1H, ddd,  $J = 13.2$ , 8.1 and 4.1,  $NCH_AH_{BAIa}$ ), 2.84 (1H, ddd,  $J = 14.2$ , 11.3 and 3.2,  $NCH_AH_{BVal}$ ), 2.70 (1H, ddd,  $J = 13.4$ , 9.4 and 3.6,  $NCH_AH_{BAIa}$ ), 1.73 (1H, oct,  $J = 6.9$ ,  $CH_{Val}$ ), 1.52 (3H, m,  $CH_3$ ), 1.50 (3H, m,  $CH_3$ ), 1.47-1.32 (18H, m, 6 x  $CH_3$ ), 1.13 (3H, d,  $J = 6.6$ ,  $CH_{3iPr}$ ), 1.11 (3H, d,  $J = 6.6$ ,  $CH_{3iPr}$ ), 1.07 (3H, d,  $J = 6.8$ ,  $CH_{3Ala}$ ), 0.96 (3H, d,  $J = 6.9$ ,  $CH_{3Val}$ ), 0.91 (3H, d,  $J = 6.9$ ,  $CH_{3Val}$ ).  $^{13}C$  NMR (125 MHz,  $CD_3OH$ )  $\delta = 178.1$  (C=O), 177.9 (C=O), 177.4 (C=O), 176.6 (C=O), 172.2 (C=O), 160.8 (C=O), 160.6 (C=O), 159.3 (C=O), 138.0 (=C<sub>Ar</sub>), 129.4 (2 x =CH<sub>Ar</sub>), 129.0 (=CH<sub>Ar</sub>), 128.6 (2 x =CH<sub>Ar</sub>), 67.7 (OCH<sub>2</sub>), 58.3 (C), 57.7 (C), 57.6 (C), 57.5 (C), 56.2 (NC $\beta$ H<sub>Val</sub>), 47.2 (NC $\beta$ H<sub>Ala</sub>), 46.7 (NC $\square$ H<sub>2Ala</sub>), 45.2 (NCH<sub>2Gly</sub>), 43.0 (NC $\square$ H<sub>2Val</sub>), 42.8 (NCH<sub>iPr</sub>), 32.0 (NC $\gamma$ H<sub>Val</sub>), 28.1 (CH<sub>3</sub>), 27.2 (CH<sub>3</sub>), 26.8 (CH<sub>3</sub>), 26.4 (CH<sub>3</sub>), 25.0 (CH<sub>3</sub>), 23.8 (CH<sub>3</sub>), 23.6 (CH<sub>iPr</sub>), 23.5 (CH<sub>iPr</sub>), 23.4 (CH<sub>3</sub>), 23.3 (CH<sub>3</sub>), 20.0 (C $\delta$ H<sub>3Val</sub>), 19.2 (C $\delta$ H<sub>3Ala</sub>), 19.0 (C $\delta$ H<sub>3Val</sub>). IR (film,  $cm^{-1}$ ):  $\nu_{max} = 3309$ , 2961, 2871, 1640, 1538;  $[\alpha]_D^{20} = +57.2$  ( $c = 1.00$ ; MeOH); **Mp**: 135-137 °C; **HRMS** (ESI<sup>+</sup>):  $m/z$  calcd for C<sub>39</sub>H<sub>67</sub>N<sub>10</sub>O<sub>9</sub> [M+H]<sup>+</sup> 819.5092, found 819.5108.

#### CbzGly-Aib<sup>u</sup>-Val<sup>u</sup>-Ala<sup>u</sup>-Leu<sup>u</sup>-NH(CO)NH*iPr* **8c**

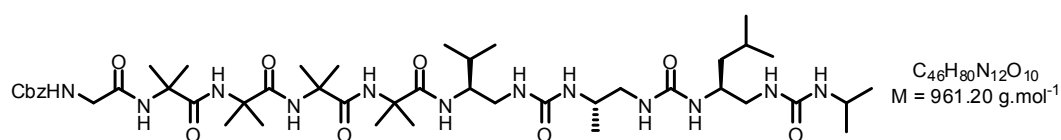

**8c** was prepared from CbzGly-Aib-OH (200 mg, 0.36 mmol), HOBT (72 mg, 0.47 mmol), EDC.HCl (76 mg, 0.40 mmol), DIPEA (92  $\mu$ L, 0.55 mmol) and **U6** (350 mg, 0.55 mmol) as described in the general procedure A. The pure oligomer **8c** (170 mg, 49.1%) was isolated as a white solid.  $^1H$  NMR (500 MHz,  $CD_3OH$ )  $\delta = 7.80$ -7.48 (5H, m, NH), 7.46-7.25 (5H, m, 5 x =CH<sub>Ar</sub>), 7.15 (1H, d,  $J = 10.1$ , NH<sub>Val</sub>), 6.31 (1H, d,  $J = 8.2$ , NH<sub>Leu</sub>), 6.21 (1H, d,  $J = 7.9$ , NH<sub>iPr</sub>), 6.04 (1H, d,  $J = 9.7$ , NH<sub>Leu</sub>), 5.95 (1H, dd,  $J = 9.0$  and 3.6, NH<sub>Ala</sub>), 5.72 (1H, dd,  $J = 9.1$  and 2.9, NH<sub>Val</sub>), 5.45 (1H, d,  $J = 10.2$ , NH<sub>Ala</sub>), 5.15 (1H, d,  $J = 12.6$ , A part of AB pattern, OCH<sub>A</sub>H<sub>B</sub>), 5.07 (1H, d,  $J = 12.4$ , B part of AB pattern, OCH<sub>A</sub>H<sub>B</sub>), 4.18-4.02 (1H, m, NCH<sub>Ala</sub>), 4.01-3.89 (1H, m, NCH<sub>Leu</sub>), 3.82 (1H, d,  $J = 16.3$ , A part of AB pattern, NCH<sub>A</sub>H<sub>BGly</sub>), 3.88-3.75 (2H, m, NCH<sub>iPr</sub> and NCH<sub>Val</sub>), 3.67 (1H, d,  $J = 16.3$ , B part of AB pattern, NCH<sub>A</sub>H<sub>BGly</sub>), 3.73-3.65 (1H, m, NCH<sub>A</sub>H<sub>BVal</sub>), 3.60 (1H, ddd,  $J = 13.3$ , 9.5 and 3.7, NCH<sub>A</sub>H<sub>BLeu</sub>), 3.53 (1H, ddd,  $J = 13.6$ , 9.4 and 3.2, NCH<sub>A</sub>H<sub>BAIa</sub>), 2.80 (1H, ddd,  $J = 14.8$ , 12.4 and 3.4, NCH<sub>A</sub>H<sub>BVal</sub>), 2.64 (1H, ddd,  $J = 12.6$ , 10.4 and 1.5, NCH<sub>A</sub>H<sub>BLeu</sub>), 2.39 (1H, ddd,  $J = 14.3$ , 11.9 and 3.4, NCH<sub>A</sub>H<sub>BAIa</sub>), 1.78-1.61 (2H, m, CH<sub>Val</sub> and CH<sub>Leu</sub>), 1.54 (3H, s, CH<sub>3</sub>), 1.50 (3H, s, CH<sub>3</sub>), 1.44 (6H, s, 2 x CH<sub>3</sub>), 1.41 (6H, s, 2 x CH<sub>3</sub>), 1.39 (6H, s, 2 x CH<sub>3</sub>), 1.31-1.16 (2H, m, CH<sub>2Leu</sub>), 1.12 (3H, d,  $J = 6.6$ , CH<sub>3iPr</sub>), 1.11 (3H, d,  $J = 6.6$ , CH<sub>3iPr</sub>), 1.05 (3H, d,  $J = 6.9$ , CH<sub>3Ala</sub>), 0.98-0.82 (12H, m, 2 x CH<sub>3Val</sub> and 2 x CH<sub>3Leu</sub>).  $^{13}C$  NMR (125 MHz,  $CD_3OH$ )  $\delta = 178.5$  (C=O), 178.0 (C=O), 177.6 (C=O), 176.6 (C=O), 172.2 (C=O), 161.1 (2 x C=O), 160.6 (C=O), 159.3 (C=O), 138.0 (=C<sub>Ar</sub>), 129.4



(2 x =CH<sub>Ar</sub>), 129.0 (=CH<sub>Ar</sub>), 128.6 (2 x =CH<sub>Ar</sub>), 67.7 (OCH<sub>2</sub>), 58.2 (C), 57.7 (C), 57.6 (C), 57.5 (C), 56.2 (NC<sub>β</sub>H<sub>Val</sub>), 49.4 (NC<sub>β</sub>H<sub>Leu</sub>), 48.1 (NC<sub>α</sub>H<sub>2Ala</sub>), 47.5 (NC<sub>β</sub>H<sub>Ala</sub>), 46.1 (NC<sub>α</sub>H<sub>2Leu</sub>), 45.3 (NCH<sub>2</sub>Gly), 44.0 (C<sub>α</sub>H<sub>2Leu</sub>), 42.9 (NC<sub>α</sub>H<sub>2Val</sub>), 42.7 (NCH<sub>iPr</sub>), 32.2 (C<sub>γ</sub>H<sub>Val</sub>), 28.3 (CH<sub>3</sub>), 27.3 (CH<sub>3</sub>), 26.9 (CH<sub>3</sub>), 26.5 (CH<sub>3</sub>), 25.9 (C<sub>δ</sub>H<sub>Leu</sub>), 23.8 (CH<sub>3</sub>), 23.7 (CH<sub>iPr</sub>), 23.6 (C<sub>H3Leu</sub>), 23.5 (CH<sub>iPr</sub>), 23.3 (CH<sub>3</sub>), 23.2 (CH<sub>3</sub>), 23.1 (CH<sub>3</sub>), 22.5 (C<sub>H3Leu</sub>), 20.1 (C<sub>δ</sub>H<sub>3Val</sub>), 19.1 (C<sub>δ</sub>H<sub>3Val</sub>), 18.7 (C<sub>δ</sub>H<sub>3Ala</sub>). IR (film, cm<sup>-1</sup>): ν<sub>max</sub> = 3309, 2962, 2932, 2871, 1641, 1544; [α]<sub>D</sub><sup>20</sup> = +64.4 (c = 1.00; MeOH); **Mp**: 151-153°C; **HRMS** (ESI<sup>+</sup>): *m/z* calcd for C<sub>46</sub>H<sub>80</sub>N<sub>12</sub>O<sub>10</sub> [M+H]<sup>+</sup> 960.6120, found 976.6189.

**CbzGly-Aib<sub>4</sub>-(Aib<sup>U</sup>)<sub>rev</sub>-Val<sup>U</sup>-Ala<sup>U</sup>-Leu<sup>U</sup>-NH(CO)NH*iPr* 9c**

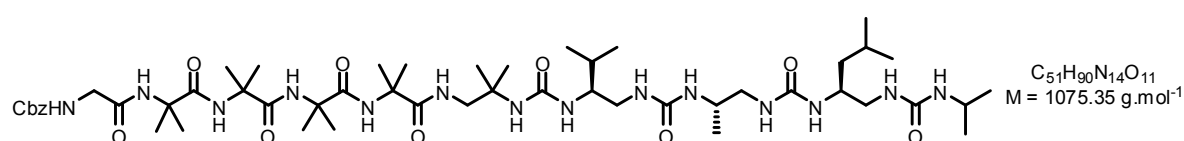

**9c** was prepared from CbzGly-Aib-OH (33 mg, 0.06 mmol), HOBT (12 mg, 0.08 mmol), EDC.HCl (13 mg, 0.07 mmol), DIPEA (16 μL, 0.09 mmol) and **U7** (50 mg, 0.08 mmol) as described in the general procedure A. The pure oligomer **9c** (50 mg, 77.9%) was isolated as a white solid. <sup>1</sup>H NMR (500 MHz, CD<sub>3</sub>OH) δ = 8.37 (1H, s, NH), 7.88-7.68 (3H, m, NH), 7.55-7.40 (2H, m, NH<sub>Gly</sub> and NH<sub>Aib<sup>U</sup></sub>), 7.40-7.24 (5H, m, 5 x =CH<sub>Ar</sub>), 6.40 (1H, dd, *J* = 9.5 and 3.2, NH<sub>Ala</sub>), 6.36 (1H, d, *J* = 9.7, NH<sub>Leu</sub>), 6.32 (1H, dd, *J* = 9.4 and 2.2, NH<sub>Val</sub>), 6.27 (1H, d, *J* = 8.4, NH<sub>Leu</sub>), 6.20 (1H, d, *J* = 7.9, NH<sub>iPr</sub>), 5.79 (1H, d, *J* = 10.1, NH<sub>Ala</sub>), 5.61 (1H, d, *J* = 10.0, NH<sub>Val</sub>), 5.56 (1H, s, NH), 5.13 (1H, d, *J* = 12.7, A part of AB pattern, OCH<sub>A</sub>H<sub>B</sub>), 5.09 (1H, d, *J* = 12.5, B part of AB pattern, OCH<sub>A</sub>H<sub>B</sub>), 4.14 (1H, dd, *J* = 13.7 and 7.6, NCH<sub>A</sub>H<sub>BAib<sup>U</sup></sub>), 4.09-3.97 (1H, m, NCH<sub>Ala</sub>), 3.96-3.86 (1H, m, NCH<sub>Leu</sub>), 3.86-3.63 (4H, m, NCH<sub>A</sub>H<sub>BVal</sub>, NCH<sub>iPr</sub> and NCH<sub>2</sub>Gly), 3.63-3.45 (3H, m, NCH<sub>Val</sub> and NCH<sub>A</sub>H<sub>BLeu</sub> and NCH<sub>A</sub>H<sub>BAla</sub>), 2.72 (1H, dd, *J* = 13.5 and 3.6, NCH<sub>A</sub>H<sub>BAib<sup>U</sup></sub>), 2.54-2.51 (1H, m, NCH<sub>A</sub>H<sub>BLeu</sub>), 2.51-2.31 (2H, m, NCH<sub>A</sub>H<sub>BVal</sub> and NCH<sub>A</sub>H<sub>BAla</sub>), 1.77-1.65 (1H, m, CH<sub>Leu</sub>), 1.63-1.52 (1H, m, CH<sub>Val</sub>), 1.52 (3H, s, CH<sub>3</sub>), 1.50 (3H, s, CH<sub>3</sub>), 1.45 (3H, s, CH<sub>3</sub>), 1.42-1.35 (18H, m, 6 x CH<sub>3</sub>), 1.25 (3H, s, CH<sub>3</sub>), 1.24-1.17 (2H, m, CH<sub>2Leu</sub>), 1.12 (3H, d, *J* = 6.6, CH<sub>3iPr</sub>), 1.11 (3H, d, *J* = 6.6, CH<sub>3iPr</sub>), 1.03 (3H, d, *J* = 6.9, CH<sub>3Ala</sub>), 0.97-0.85 (12H, m, 2 x CH<sub>3Val</sub> and 2 x CH<sub>3Leu</sub>). <sup>13</sup>C NMR (125 MHz, CD<sub>3</sub>OH) δ = 177.8 (C=O), 177.3 (C=O), 177.1 (C=O), 176.6 (C=O), 172.2 (C=O), 161.8 (C=O), 161.5 (C=O), 160.6 (C=O), 160.3 (C=O), 159.3 (C=O), 138.0 (=C<sub>Ar</sub>), 129.4 (2 x =CH<sub>Ar</sub>), 129.0 (=CH<sub>Ar</sub>), 128.6 (2 x =CH<sub>Ar</sub>), 67.7 (OCH<sub>2</sub>), 58.2 (C), 57.8 (C), 57.7 (C), 57.5 (C), 55.9 (NC<sub>β</sub>H<sub>Val</sub>), 53.7 (C), 49.2 (NC<sub>β</sub>H<sub>Leu</sub>), 48.4 (NCH<sub>2</sub>Aib<sup>U</sup>), 47.8 (NC<sub>α</sub>H<sub>2Ala</sub>), 46.5 (NC<sub>β</sub>H<sub>Ala</sub>), 46.2 (NC<sub>α</sub>H<sub>2Leu</sub>), 45.2 (NCH<sub>2</sub>Gly), 44.6 (NC<sub>α</sub>H<sub>2Val</sub>), 43.9 (C<sub>α</sub>H<sub>2Leu</sub>), 42.7 (NCH<sub>iPr</sub>), 32.0 (C<sub>γ</sub>H<sub>Val</sub>), 27.5 (CH<sub>3</sub>), 27.2 (CH<sub>3</sub>), 26.1 (CH<sub>3</sub>), 25.9 (2 x CH<sub>3</sub>), 25.6 (C<sub>δ</sub>H<sub>Leu</sub>), 25.0 (CH<sub>3</sub>), 24.8 (CH<sub>3</sub>), 24.6 (CH<sub>3</sub>), 23.6 (CH<sub>iPr</sub>), 23.6 (CH<sub>iPr</sub>), 23.5 (C<sub>H3Leu</sub>), 22.5 (C<sub>H3Leu</sub>), 20.1 (C<sub>δ</sub>H<sub>3Val</sub>), 18.8 (C<sub>δ</sub>H<sub>3Ala</sub>), 18.6 (C<sub>δ</sub>H<sub>3Val</sub>).

**IR** (film,  $\text{cm}^{-1}$ ):  $\nu_{\text{max}} = 3326, 2970, 2871, 1642, 1551$ ;  $[\alpha]_{\text{D}}^{20} = +50.4$  ( $c = 1.00$ ; MeOH); **Mp**:  $> 200^\circ\text{C}$ ; **MS** ( $\text{ES}^+$ ):  $m/z$  calcd for  $\text{C}_{51}\text{H}_{91}\text{N}_{14}\text{O}_{11}$   $[\text{M}+\text{H}]^+$  1076.3.

**CbzGly-Aib<sub>4</sub>(Aib<sup>U</sup>)<sub>rev</sub>-Val<sup>U</sup>-Ala<sup>U</sup>-Leu<sup>U</sup>-NH(CO)NH*i*Pr **10c****

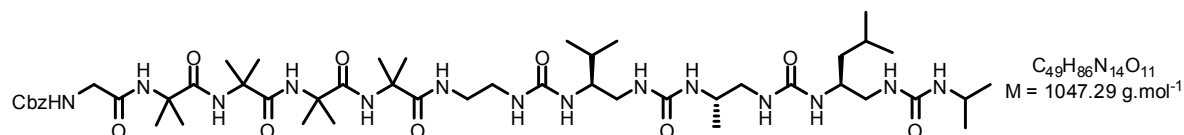

**10c** was prepared from CbzGly-Aib-OH (34 mg, 0.06 mmol), HOBT (12 mg, 0.08 mmol), EDC.HCl (13 mg, 0.07 mmol), DIPEA (16  $\mu\text{L}$ , 0.09 mmol) and **U8** (50 mg, 0.08 mmol) as described in the general procedure A. The pure oligomer **10c** (53 mg, 81.0%) was isolated as a white solid.  $^1\text{H NMR}$  (500 MHz,  $\text{CD}_3\text{OH}$ )  $\delta = 8.41$  (1H, s, NH), 7.83 (1H, s, NH), 7.79 (1H, s, NH), 7.76 (1H, s, NH), 7.51-7.42 (1H, m,  $\text{NH}_{\text{Gly}}$ ), 7.39-7.27 (6H, m, 5 x  $=\text{CH}_{\text{Ar}}$  and  $\text{NH}_{\text{EDA}}$ ), 6.37 (1H, d,  $J = 8.3$ ,  $\text{NH}_{\text{Leu}}$ ), 6.30 (1H, d,  $J = 6.7$ ,  $\text{NH}_{\text{Ala}}$ ), 6.18 (1H, d,  $J = 7.9$ ,  $\text{NH}_{\text{iPr}}$ ), 6.07 (1H, d,  $J = 8.6$ ,  $\text{NH}_{\text{Val}}$ ), 6.02 (1H, d,  $J = 9.8$ ,  $\text{NH}_{\text{Leu}}$ ), 5.99-5.88 (2H, m,  $\text{NH}_{\text{EDA}}$  and  $\text{NH}_{\text{Ala}}$ ), 5.63 (1H, d,  $J = 10.2$ ,  $\text{NH}_{\text{Val}}$ ), 5.15 (1H, d,  $J = 12.6$ , A part of AB pattern,  $\text{OCH}_\text{A}\text{H}_\text{B}$ ), 5.09 (1H, d,  $J = 12.5$ , B part of AB pattern,  $\text{OCH}_\text{A}\text{H}_\text{B}$ ), 4.14-3.99 (1H, m,  $\text{NCH}_{\text{Ala}}$ ), 3.98-3.86 (1H, m,  $\text{NCH}_{\text{Leu}}$ ), 3.86-3.73 (3H, m,  $\text{NCH}_\text{A}\text{H}_{\text{BEDA}}$ ,  $\text{NCH}_\text{A}\text{H}_{\text{BGly}}$  and  $\text{NCH}_{\text{iPr}}$ ), 3.72-3.43 (6H, m,  $\text{NCH}_{\text{Val}}$ ,  $\text{NCH}_\text{A}\text{H}_{\text{BVal}}$ ,  $\text{NCH}_\text{A}\text{H}_{\text{BLeu}}$ ,  $\text{NCH}_\text{A}\text{H}_{\text{BAla}}$ ,  $\text{NCH}_\text{A}\text{H}_{\text{BEDA}}$  and  $\text{NCH}_\text{A}\text{H}_{\text{BGly}}$ ), 3.11-2.98 (1H, m,  $\text{NCH}_\text{A}\text{H}_{\text{BEDA}}$ ), 2.95-2.80 (1H, m,  $\text{NCH}_\text{A}\text{H}_{\text{BEDA}}$ ), 2.70-2.56 (1H, m,  $\text{NCH}_\text{A}\text{H}_{\text{BLeu}}$ ), 2.56-2.40 (2H, m,  $\text{NCH}_\text{A}\text{H}_{\text{BVal}}$  and  $\text{NCH}_\text{A}\text{H}_{\text{BAla}}$ ), 1.76-1.65 (1H, m,  $\text{CH}_{\text{Leu}}$ ), 1.64-1.55 (1H, m,  $\text{CH}_{\text{Val}}$ ), 1.51 (6H, m, 2 x  $\text{CH}_3$ ), 1.47-1.36 (18H, m, 6 x  $\text{CH}_3$ ), 1.28-1.17 (2H, m,  $\text{CH}_{2\text{Leu}}$ ), 1.12 (3H, d,  $J = 6.6$ ,  $\text{CH}_{3\text{iPr}}$ ), 1.11 (3H, d,  $J = 6.6$ ,  $\text{CH}_{3\text{iPr}}$ ), 1.06 (3H, d,  $J = 6.9$ ,  $\text{CH}_{3\text{Ala}}$ ), 0.97-0.85 (12H, m, 2 x  $\text{CH}_{3\text{Leu}}$  and 2 x  $\text{CH}_{3\text{Val}}$ ).  $^{13}\text{C NMR}$  (125 MHz,  $\text{CD}_3\text{OH}$ )  $\delta = 178.4$  (C=O), 177.7 (C=O), 176.8 (C=O), 172.2 (C=O), 161.7 (C=O), 161.4 (C=O), 161.3 (C=O), 160.6 (C=O), 160.6 (C=O), 159.4 (C=O), 138.0 ( $=\text{C}_{\text{Ar}}$ ), 129.5 (2 x  $=\text{CH}_{\text{Ar}}$ ), 129.0 ( $=\text{CH}_{\text{Ar}}$ ), 128.6 (2 x  $=\text{CH}_{\text{Ar}}$ ), 67.7 ( $\text{OCH}_2$ ), 58.0 (C), 57.8 (C), 57.6 (C), 57.6 (C), 56.4 ( $\text{NC}_\beta\text{H}_{\text{Val}}$ ), 49.3 ( $\text{NC}_\beta\text{H}_{\text{Leu}}$ ), 48.1 ( $\text{NC}_\square\text{H}_{2\text{Ala}}$ ), 46.3 ( $\text{NC}_\beta\text{H}_{\text{Ala}}$ ), 46.2 ( $\text{NC}_\square\text{H}_{2\text{Leu}}$ ), 45.3 ( $\text{NCH}_{2\text{Gly}}$ ), 44.6 ( $\text{NC}_\square\text{H}_{2\text{Val}}$ ), 44.0 ( $\text{C}_\square\text{H}_{2\text{Leu}}$ ), 42.8 ( $\text{NCH}_{\text{iPr}}$ ), 40.3 ( $\text{NCH}_2$ ), 40.2 ( $\text{NCH}_2$ ), 32.0 ( $\text{C}_\gamma\text{H}_{\text{Val}}$ ), 27.6 ( $\text{CH}_3$ ), 27.0 ( $\text{CH}_3$ ), 26.5 ( $\text{CH}_3$ ), 26.1 ( $\text{CH}_3$ ), 25.8 ( $\text{C}_\delta\text{H}_{\text{Leu}}$ ), 24.2 ( $\text{CH}_3$ ), 23.8 ( $\text{CH}_3$ ), 23.7 ( $\text{CH}_3$ ), 23.7 ( $\text{CH}_{3\text{iPr}}$ ), 23.6 ( $\text{CH}_{3\text{iPr}}$ ), 23.6 ( $\text{C}_\delta\text{H}_{3\text{Leu}}$ ), 23.5 ( $\text{CH}_3$ ), 22.5 ( $\text{C}_\delta\text{H}_{3\text{Leu}}$ ), 20.2 ( $\text{C}_\delta\text{H}_{3\text{Val}}$ ), 18.7 ( $\text{C}_\delta\text{H}_{3\text{Ala}}$ ), 18.6 ( $\text{C}_\delta\text{H}_{3\text{Val}}$ ). **IR** (film,  $\text{cm}^{-1}$ ):  $\nu_{\text{max}} = 3338, 2960, 2934, 2872, 1639, 1549$ ;  $[\alpha]_{\text{D}}^{20} = +55.2$  ( $c = 1.00$ ; MeOH); **Mp**: 162-164  $^\circ\text{C}$ ; **MS** ( $\text{ES}^+$ ):  $m/z$  calcd for  $\text{C}_{49}\text{H}_{87}\text{N}_{14}\text{O}_{11}$   $[\text{M}+\text{H}]^+$  1047.9.

**Cbz-Aib\*-Aib<sub>4</sub>-(Aib<sup>U</sup>)<sub>rev</sub>-Val<sup>U</sup>-Ala<sup>U</sup>-Leu<sup>U</sup>-NH(CO)NH*i*Pr **11****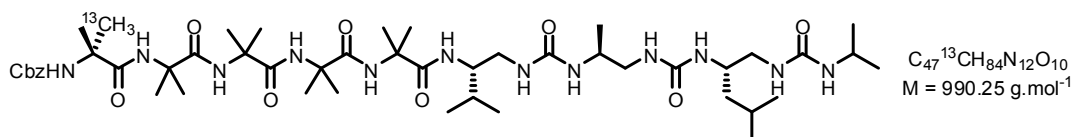

**11** was prepared from CbzAib\*-Aib-OH (50 mg, 0.09 mmol), HOBt (17 mg, 0.11 mmol), EDC.HCl (18 mg, 0.10 mmol), DIPEA (22  $\mu$ L, 0.13 mmol) and **U6** (75 mg, 0.11 mmol) as described in the general procedure A. The pure oligomer **11** (70 mg, 82.7%) was isolated as a white solid.  $^1\text{H NMR}$  (500 MHz,  $\text{CD}_3\text{OH}$ )  $\delta$  = 8.11 (1H, s, NH), 7.97 (1H, s, NH), 7.83 (1H, s, NH), 7.72 (1H, s, NH), 7.61 (1H, s, NH), 7.44-7.25 (5H, m, 5 x =CH<sub>Ar</sub>), 7.15 (1H, d,  $J$  = 10.1, NH<sub>Val</sub>), 6.31 (1H, d,  $J$  = 7.6, NH<sub>Leu</sub>), 6.22 (1H, d,  $J$  = 7.9, NH<sub>iPr</sub>), 6.04 (1H, d,  $J$  = 9.7, NH<sub>Leu</sub>), 5.95 (1H, dd,  $J$  = 9.1 and 3.8, NH<sub>Ala</sub>), 5.70 (1H, dd,  $J$  = 9.4 and 3.4, NH<sub>Val</sub>), 5.46 (1H, d,  $J$  = 10.2, NH<sub>Ala</sub>), 5.22 (1H, d,  $J$  = 12.9, A part of AB pattern, OCH<sub>A</sub>H<sub>B</sub>), 5.04 (1H, d,  $J$  = 12.7, B part of AB pattern, OCH<sub>A</sub>H<sub>B</sub>), 4.18-4.03 (1H, m, NCH<sub>Ala</sub>), 4.01-3.88 (1H, m, NCH<sub>Leu</sub>), 3.88-3.75 (2H, m, NCH<sub>iPr</sub> and NCH<sub>Val</sub>), 3.68 (1H, ddd,  $J$  = 13.9, 9.6 and 3.8, NCH<sub>A</sub>H<sub>BVal</sub>), 3.61 (1H, ddd,  $J$  = 13.2, 9.6 and 3.6, NCH<sub>A</sub>H<sub>BLeu</sub>), 3.53 (1H, ddd,  $J$  = 13.7, 9.5 and 3.3, NCH<sub>A</sub>H<sub>BAla</sub>), 2.80 (1H, ddd,  $J$  = 14.9, 12.4 and 3.6, NCH<sub>A</sub>H<sub>BVal</sub>), 2.64 (1H, ddd,  $J$  = 12.5, 10.0 and 1.3, NCH<sub>A</sub>H<sub>BLeu</sub>), 2.39 (1H, ddd,  $J$  = 14.4, 11.7 and 3.6, NCH<sub>A</sub>H<sub>BAla</sub>), 1.77-1.62 (2H, m, CH<sub>Val</sub> and CH<sub>Leu</sub>), 1.56-1.18 (32H, m, 10 x CH<sub>3</sub> and CH<sub>2Leu</sub>), 1.12 (3H, d,  $J$  = 6.6, CH<sub>3iPr</sub>), 1.11 (3H, d,  $J$  = 6.6, CH<sub>3iPr</sub>), 1.05 (3H, d,  $J$  = 6.9, CH<sub>3Ala</sub>), 0.96-0.86 (12H, m, 2 x CH<sub>3Val</sub> and 2 x CH<sub>3Leu</sub>).  $^{13}\text{C NMR}$  (125 MHz,  $\text{CD}_3\text{OH}$ )  $\delta$  = 178.5 (C=O), 178.0 (C=O), 177.9 (C=O), 177.2 (C=O), 177.0 (C=O), 161.1 (2 x C=O), 160.6 (C=O), 157.9 (C=O), 138.6 (=C<sub>Ar</sub>), 129.5 (2 x =CH<sub>Ar</sub>), 128.9 (=CH<sub>Ar</sub>), 128.4 (2 x =CH<sub>Ar</sub>), 67.5 (OCH<sub>2</sub>), 58.2 (C), 57.8 (d,  $^1J_{\text{C-}^{13}\text{C}} = 39$ ,  $^{13}\text{CH}_3\text{C}$ ), 57.7 (C), 57.6 (C), 57.5 (C), 56.2 (NC $\beta$ H<sub>Val</sub>), 49.4 (NC $\beta$ H<sub>Leu</sub>), 48.1 (NC $\square$ H<sub>2Ala</sub>), 46.2 (NC $\beta$ H<sub>Ala</sub>), 46.1 (NC $\square$ H<sub>2Leu</sub>), 44.0 (C $\square$ H<sub>2Leu</sub>), 43.0 (NC $\square$ H<sub>2Val</sub>), 42.7 (NCH<sub>iPr</sub>), 32.2 (C $\gamma$ H<sub>Val</sub>), 28.3 (CH<sub>3</sub>), 27.4 (CH<sub>3</sub>), 27.0 (CH<sub>3</sub>), 26.8 (CH<sub>3</sub>), 26.2 ( $^{13}\text{CH}_3$ <sub>minor</sub>), 25.8 (C $\delta$ H<sub>Leu</sub>), 24.4 (CH<sub>3</sub>), 24.1 ( $^{13}\text{CH}_3$ <sub>major</sub>), 23.7 (CH<sub>iPr</sub>), 23.6 (CH<sub>3Leu</sub>), 23.5 (CH<sub>iPr</sub>), 23.3 (CH<sub>3</sub>), 23.2 (CH<sub>3</sub>), 23.1 (CH<sub>3</sub>), 22.5 (C $\delta$ H<sub>3Leu</sub>), 20.1 (C $\delta$ H<sub>3Val</sub>), 19.1 (C $\delta$ H<sub>3Val</sub>), 18.7 (C $\delta$ H<sub>3Ala</sub>). IR (film,  $\text{cm}^{-1}$ ):  $\nu_{\text{max}}$  = 3316, 2971, 2871, 1645, 1536;  $[\alpha]_{\text{D}}^{20} = +62.4$  ( $c = 1.00$ ; MeOH); **Mp**: 148-150 °C; **HRMS** (ESI<sup>+</sup>):  $m/z$  calcd for  $C_{47}H_{85}N_{12}O_{10}$   $[M+H]^+$  990.6545, found 990.6538.

### Ac<sup>A</sup>Phe-Aib<sub>4</sub>-Leu<sup>U</sup>-Val<sup>U</sup>-Ala<sup>U</sup>-NH(CO)NH*i*Pr **12**

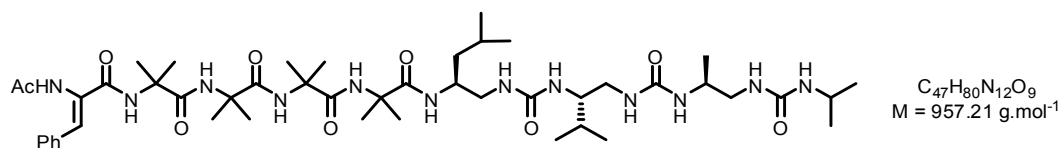

To a stirred solution of H-Aib<sub>4</sub>-Leu<sup>U</sup>-Val<sup>U</sup>-Ala<sup>U</sup>-NH(CO)NH*i*Pr (34 mg, 0.43 mmol; obtained in quantitative yield by hydrogenolysis of N<sub>3</sub>-Aib<sub>4</sub>-Leu<sup>U</sup>-Val<sup>U</sup>-Ala<sup>U</sup>-NH(CO)NH*i*Pr) and Et<sub>3</sub>N (9 μL, 0.06 mmol) in DMF (214 μL) was added **A1** (15 mg, 0.08 mmol) and the reaction stirred at reflux for 5 d. The solvents were removed under reduced pressure and purification by column chromatography (SiO<sub>2</sub>; CH<sub>2</sub>Cl<sub>2</sub>:MeOH; 99:1→90:10) gave the title compound as a white solid (13 mg, 31.8%). <sup>1</sup>H NMR (400 MHz, CD<sub>3</sub>OH) δ = 7.95-7.89 (1H, m, NH), 7.61-7.53 (2H, m, 2 x =CH<sub>Ar</sub>), 7.50-7.43 (2H, m, 2 x =CH<sub>Ar</sub>), 7.40-7.34 (1H, m, =CH<sub>Ar</sub>), 7.33-7.22 (1H, m, NH), 6.90 (1H, s, =CH), 5.89-5.80 (1H, m, NH), 5.62 (1H, d, *J* = 10.1, NH), 4.32-4.15 (1H, m, NCH<sub>Leu</sub>), 4.01-3.90 (1H, m, NCH<sub>Ala</sub>), 3.89-3.81 (1H, m, NCH<sub>iPr</sub>), 3.77-3.47 (4H, m, NCH<sub>Val</sub>, NCH<sub>A</sub>H<sub>BVal</sub>, NCH<sub>A</sub>H<sub>BLeu</sub> and NCH<sub>A</sub>H<sub>BAla</sub>), 2.83-2.62 (2H, m, NCH<sub>A</sub>H<sub>BAla</sub> and NCH<sub>A</sub>H<sub>BLeu</sub>), 2.57-2.40 (1H, m, NCH<sub>A</sub>H<sub>BVal</sub>), 2.18 (3H, s, CH<sub>3</sub>), 1.76-1.61 (2H, m, CH<sub>Leu</sub> and CH<sub>Val</sub>), 1.60-1.47 (24H, m, 8 x CH<sub>3</sub>), 1.46-1.36 (1H, m, CH<sub>A</sub>H<sub>BLeu</sub>), 1.31-1.19 (1H, m, CH<sub>A</sub>H<sub>BLeu</sub>), 1.16 (6H, d, *J* = 6.5, 2 x CH<sub>3*iPr*</sub>), 1.09 (3H, d, *J* = 6.7, CH<sub>3Ala</sub>), 1.03-0.84 (12H, m, 2 x CH<sub>3Val</sub> and 2 x CH<sub>3Leu</sub>). <sup>13</sup>C NMR (100 MHz, CD<sub>3</sub>OH) δ = 178.2 (C=O), 178.1 (C=O), 176.8 (C=O), 176.9 (C=O), 173.1 (C=O), 161.7 (C=O), 161.3 (C=O), 161.3 (C=O), 160.7 (C=O), 135.1 (=C), 131.5 (=C), 130.6 (2 x =CH), 130.0 (=CH), 129.9 (2 x =CH), 127.3 (=CH), 58.4 (C), 58.2 (C), 58.0 (C), 57.7 (C), 56.3 (NC<sub>β</sub>H<sub>Val</sub>), 48.7 (NC<sub>β</sub>H<sub>Leu</sub>), 47.0 (NC<sub>β</sub>H<sub>Ala</sub>), 46.7 (NC<sub>α</sub>H<sub>2Ala</sub>), 45.8 (NC<sub>α</sub>H<sub>2Leu</sub>), 44.4 (NC<sub>α</sub>H<sub>2Val</sub>), 42.8 (NCH<sub>iPr</sub>), 42.3 (C<sub>α</sub>H<sub>2Leu</sub>), 32.2 (C<sub>γ</sub>H<sub>Val</sub>), 28.3 (CH<sub>3</sub>), 27.5 (CH<sub>3</sub>), 26.9 (CH<sub>3</sub>), 26.8 (CH<sub>3</sub>), 26.3 (CH<sub>3</sub>), 23.9 (C<sub>δ</sub>H<sub>Leu</sub>), 23.8 (CH<sub>iPr</sub>), 23.7 (CH<sub>iPr</sub>), 23.7 (CH<sub>3Leu</sub>), 23.5 (CH<sub>3</sub>), 23.2 (CH<sub>3</sub>), 23.2 (CH<sub>3</sub>), 22.8 (CH<sub>3</sub>), 22.4 (CH<sub>3Leu</sub>), 20.2 (C<sub>δ</sub>H<sub>3Val</sub>), 19.6 (C<sub>δ</sub>H<sub>3Ala</sub>), 18.5 (C<sub>δ</sub>H<sub>3Val</sub>). 3435, 2972, 2949, 1625, 1493; [α]<sub>D</sub><sup>20</sup> = + 41.0 (c = 1.00; MeOH); **Mp**: >200 °C; **HRMS** (ESI<sup>+</sup>): *m/z* calcd for C<sub>47</sub>H<sub>80</sub>O<sub>12</sub>N<sub>9</sub>Na [M+Na]<sup>+</sup> 979.6069, found 979.6024.

### AcPhAla-Aib<sub>4</sub>-Leu<sup>U</sup>-Val<sup>U</sup>-Ala<sup>U</sup>-NH(CO)NH*i*Pr **13**

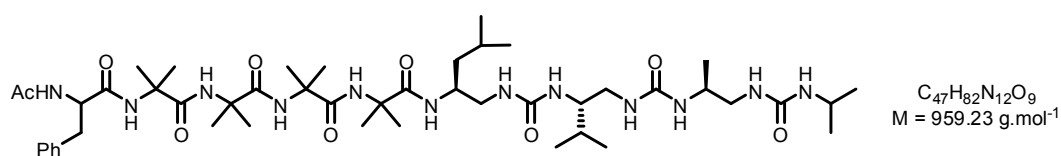

A round-bottomed flask was charged with a solution of **12** (12 mg, 0.013 mmol) in EtOH (200 μL) and 10% m. of Pd/C was added carefully. The mixture was stirred under H<sub>2</sub> atmosphere (balloon) for 48 h.

Upon completion, the mixture was filtered through a celite pad and washed with EtOH. The mixture was then concentrated under reduced pressure to give compounds **13a** and **13b** (11 mg, 91.5%, diastereoselective ratio 1/3). <sup>1</sup>H NMR (400 MHz, CD<sub>3</sub>OH) δ = 7.39-7.16 (5H, m, =CH<sub>Ar</sub>), 4.45 (0.25H, t, J = 7.7, AcNCH), 4.35 (0.75H, t, J = 8.0, AcNCH), 4.27-4.10 (1H, m, NCH<sub>Leu</sub>), 3.99-3.77 (2H, m, NCH<sub>Ala</sub> and NCH<sub>iPr</sub>), 3.75-3.48 (4H, m, NCH<sub>Val</sub>, NCH<sub>AH<sub>B</sub>Val</sub>, NCH<sub>AH<sub>B</sub>Leu</sub>, NCH<sub>AH<sub>B</sub>Ala</sub>), 3.18-2.90 (2H, m, CH<sub>2</sub>), 2.76-2.38 (3H, m, NCH<sub>AH<sub>B</sub>Leu</sub>, NCH<sub>AH<sub>B</sub>Val</sub> and NCH<sub>AH<sub>B</sub>Ala</sub>), 1.97 (3H, s, CH<sub>3</sub>), 1.73-1.58 (2H, m, CH<sub>Leu</sub> and CH<sub>Val</sub>), 1.57-1.17 (26H, m, 8 x CH<sub>3</sub> and CH<sub>2Leu</sub>), 1.13 (6H, d, J = 6.6, 2 x CH<sub>3iPr</sub>), 1.06 (3H, d, J = 6.7, CH<sub>3Ala</sub>), 1.0-0.81 (12H, m, 2 x CH<sub>3Val</sub> and 2 x CH<sub>3Leu</sub>). <sup>13</sup>C NMR (100 MHz, CD<sub>3</sub>OH) δ = 178.1 (C=O), 178.1 (C=O), 177.7 (C=O), 176.8 (C=O), 174.3 (C=O), 173.8 (C=O), 173.6 (C=O), 161.7 (C=O), 161.3 (C=O), 160.7 (C=O), 138.1 (=C), 137.8 (=C), 130.5 (2 x =CH), 130.4 (=CH), 129.5 (2 x =CH), 128.0 (3 x =CH), 127.9 (2 x =CH), 58.3 (C), 58.2 (C), 57.8 (C), 57.7 (C), 57.7 (C), 57.6 (C), 57.5 (C), 57.3 (C), 57.1 (NC<sub>β</sub>H<sub>Val</sub>), 56.2 (NCH), 48.7 (NC<sub>β</sub>H<sub>Leu</sub>), 47.0 (NC<sub>β</sub>H<sub>Ala</sub>), 46.7 (NC<sub>α</sub>H<sub>2Ala</sub>), 45.8 (NC<sub>α</sub>H<sub>2Leu</sub>), 44.4 (NC<sub>α</sub>H<sub>2Val</sub>), 42.8 (NCH<sub>iPr</sub>), 42.3 (C<sub>α</sub>H<sub>2Leu</sub>), 38.1 (NCH), 38.0 (NCH), 32.2 (C<sub>γ</sub>H<sub>Val</sub>), 28.3 (CH<sub>3</sub>), 27.7 (CH<sub>3</sub>), 27.3 (CH<sub>3</sub>), 26.8 (CH<sub>3</sub>), 26.3 (CH<sub>3</sub>), 24.2 (C<sub>δ</sub>H<sub>Leu</sub>), 23.8 (CH<sub>iPr</sub>), 23.8 (CH<sub>iPr</sub>), 23.7 (CH<sub>3Leu</sub>), 23.4 (CH<sub>3</sub>), 23.2 (CH<sub>3</sub>), 23.2 (CH<sub>3</sub>), 22.4 (CH<sub>3</sub>), 22.4 (CH<sub>3Leu</sub>), 20.2 (C<sub>δ</sub>H<sub>3Val</sub>), 19.5 (C<sub>δ</sub>H<sub>3Ala</sub>), 18.5 (C<sub>δ</sub>H<sub>3Val</sub>). IR (film, cm<sup>-1</sup>): ν<sub>max</sub> = 3334, 2693, 2930, 1632, 1574, 1472; HRMS (ESI<sup>+</sup>): m/z calcd for C<sub>47</sub>H<sub>82</sub>O<sub>12</sub>N<sub>9</sub>Na [M+Na]<sup>+</sup> 981.6225, found 981.6191.

#### Ac<sup>A</sup>Phe-Leu<sup>u</sup>-Val<sup>u</sup>-Ala<sup>u</sup>-NH(CO)NH*i*Pr **14**

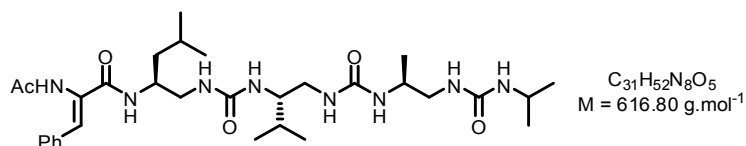

Boc-protected oligourea U9 (80 mg, 0.15 mmol) was dissolved in TFA (800 μL) and stirred for 45 min. The reaction mixture was then concentrated under reduced. Triethylamine (14 μL, 0.14 mmol) and an **A1** (25 mg, 0.13 mmol) were added to the crude product was then dissolved in acetonitrile. The reaction stirred at reflux for 5 d. The solvents were removed under reduced pressure and purification by column chromatography (SiO<sub>2</sub>; CH<sub>2</sub>Cl<sub>2</sub>:MeOH; 99:1→90:10) gave the title compound as a white solid (50 mg, 87%). <sup>1</sup>H NMR (400 MHz, CD<sub>3</sub>OH) δ = 7.60-7.51 (2H, m, =CH<sub>Ar</sub>), 7.47-7.38 (2H, m, =CH<sub>Ar</sub>), 7.38-7.29 (1H, m, =CH<sub>Ar</sub>), 6.89 (1H, s, =CH), 4.37-4.23 (1H, m, NCH<sub>Leu</sub>), 3.95-3.87 (1H, m, NCH<sub>Ala</sub>), 3.86-3.70 (1H, m, NCH<sub>iPr</sub>), 3.70-3.56 (3H, m, NCH<sub>Val</sub>, NCH<sub>AH<sub>B</sub>Val</sub> and NCH<sub>AH<sub>B</sub>Ala</sub>), 3.55-3.44 (1H, m, NCH<sub>AH<sub>B</sub>Leu</sub>), 2.70 (1H, dd, J = 13.2 and 9.5, NCH<sub>AH<sub>B</sub>Leu</sub>), 2.62 (1H, t, J = 12.2, NCH<sub>AH<sub>B</sub>Ala</sub>), 2.50 (1H, t, J = 12.4, NCH<sub>AH<sub>B</sub>Val</sub>), 2.13 (3H, s, CH<sub>3</sub>), 1.81-1.69 (1H, m, CH<sub>Leu</sub>), 1.65 (1H, oct, J =, CH<sub>Val</sub>), 1.44 (1H, ddd, J = 7.1, CH<sub>AH<sub>B</sub>Leu</sub>), 1.26 (1H, ddd, J = 7.1, CH<sub>AH<sub>B</sub>Leu</sub>), 1.14 (6H, d, J = 6.5, 2 x CH<sub>3iPr</sub>), 1.04 (3H, d, J = 6.8,

$CH_{3Ala}$ ), 1.01-0.86 (12H, m, 2 x  $CH_{3Val}$  and 2 x  $CH_{3Leu}$ ).  $^{13}C$  NMR (100 MHz,  $CD_3OH$ )  $\delta$  = 173.5 (C=O), 168.9 (C=O), 161.6 (C=O), 161.2 (C=O), 160.6 (C=O), 135.1 (=C), 131.7 (=C), 130.5 (2 x =CH), 130.0 (=CH), 129.9 (2 x =CH), 127.9 (=CH), 56.3 ( $NC_{\beta}H_{Val}$ ), 49.7( $NC_{\beta}H_{Leu}$ ), 47.0 ( $NC_{\beta}H_{Ala}$ ), 46.7 ( $NC_{\square}H_{2Ala}$ ), 46.3 ( $NC_{\square}H_{2Leu}$ ), 44.1 ( $NC_{\square}H_{2Val}$ ), 42.8 ( $NCH_{iPr}$ ), 42.0 ( $C_{\square}H_{2Leu}$ ), 32.1 ( $C_{\gamma}H_{Val}$ ), 26.5 ( $C_{\delta}H_{Leu}$ ), 23.8 ( $CH_{3Leu}$ ), 23.7 (2 x  $CH_{iPr}$ ), 22.7 ( $CH_3$  and  $CH_{3Leu}$ ), 20.1 ( $C_{\delta}H_{3Val}$ ), 19.4 ( $C_{\delta}H_{3Ala}$ ), 18.5 ( $C_{\delta}H_{3Val}$ ). IR (film,  $cm^{-1}$ ):  $\nu_{max}$  = 3428, 2962, 2929, 2872, 1619, 1480;  $[\alpha]_D^{20}$  = + 72 (c = 1.00; MeOH); **Mp**: 145-146 °C; **HRMS** (ESI<sup>+</sup>):  $m/z$  calcd for  $C_{31}H_{52}O_5N_8Na$  [M+Na]<sup>+</sup> 639.3958, found 639.3965.

### AcPhAla-Leu<sup>u</sup>-Val<sup>u</sup>-Ala<sup>u</sup>-NH(CO)NH*iPr* **15**

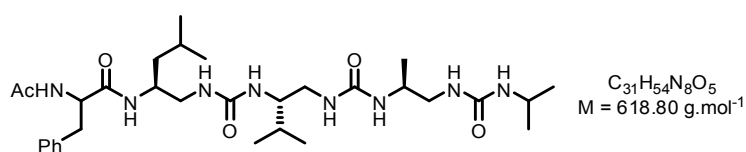

A round-bottomed flask was charged with a solution of **14** (6 mg, 0.01 mmol) in EtOH (200  $\mu$ L) and 10% m. of Pd/C was added carefully. The mixture was stirred under  $H_2$  atmosphere (balloon) for 48 h. Upon completion, the mixture was filtered through a celite pad and washed with EtOH. The mixture was then concentrated under reduced pressure to give compounds **15a** and **15b** (5 mg, 83%, diastereoselective ratio 1/1.3).  $^1H$  NMR (400 MHz,  $CD_3OH$ )  $\delta$  = 7.38-7.12 (5H, m, = $CH_{Ar}$ ), 4.56 (0.42H, dd,  $J$  = 9.5 and 5.5, AcNCH), 4.56 (0.58H, t,  $J$  = 7.9, AcNCH), 4.20-4.03 (1H, m,  $NCH_{Leu}$ ), 3.94-3.75 (2H, m,  $NCH_{Ala}$  and  $NCH_{iPr}$ ), 3.67-3.39 (4H, m,  $NCH_{Val}$ ,  $NCH_AH_{BVal}$ ,  $NCH_AH_{BLeu}$ ,  $NCH_AH_{BAla}$ ), 3.15 (0.43H, dd,  $J$  = 14.2 and 5.6,  $CH_ACH_B$ ), 3.00 (1.18H, d,  $J$  = 7.9,  $CH_2$ ), 2.94 (0.43H, dd,  $J$  = 14.1 and 9.5,  $CH_ACH_B$ ), 2.76-2.36 (3H, m,  $NCH_AH_{BLeu}$ ,  $NCH_AH_{BVal}$  and  $NCH_AH_{BAla}$ ), 1.97 (1.65H, s,  $CH_3$ ), 1.93 (1.27H, s,  $CH_3$ ), 1.70-1.57 (2H, m,  $CH_{Leu}$  and  $CH_{Val}$ ), 1.41-1.32 (1H, m,  $CH_AH_{BLeu}$ ), 1.26-1.17 (1H, m,  $CH_AH_{BLeu}$ ), 1.16-0.70 (21H, m, 2 x  $CH_{3iPr}$ ,  $CH_{3Ala}$ , 2 x  $CH_{3Val}$  and 2 x  $CH_{3Leu}$ ).  $^{13}C$  NMR (100 MHz,  $CD_3OH$ )  $\delta$  = 174.3 (C=O), 174.2 (C=O), 173.7 (C=O), 173.6 (C=O), 162.7 (C=O), 161.4 (C=O), 161.3 (C=O), 161.2 (C=O), 161.2 (C=O), 160.6 (C=O), 138.6 (=C), 137.9 (=C), 130.3 (2 x =CH), 130.2 (2 x =CH), 129.6 (2 x =CH), 129.5 (2 x =CH), 128.0 (=CH), 127.9 (=CH), 64.3 ( $NC_{\beta}H_{Val}$ ), 57.7 (NCH), 56.9 ( $NC_{\beta}H_{Val}$ ), 56.2 (NCH), 49.2 ( $NC_{\beta}H_{Leu}$ ), 49.0 ( $NC_{\beta}H_{Leu}$ ), 47.3 ( $NC_{\beta}H_{Ala}$ ), 47.2 ( $NC_{\beta}H_{Ala}$ ), 46.7 ( $NC_{\square}H_{2Ala}$ ), 46.6 ( $NC_{\square}H_{2Ala}$ ), 46.2 ( $NC_{\square}H_{2Leu}$ ), 46.1 ( $NC_{\square}H_{2Leu}$ ), 44.4 ( $NC_{\square}H_{2Val}$ ), 42.8 ( $NCH_{iPr}$ ), 42.8 ( $NCH_{iPr}$ ), 41.9 ( $C_{\square}H_{2Leu}$ ), 38.8 ( $CH_2$ ), 38.7 ( $CH_2$ ), 32.0 ( $C_{\gamma}H_{Val}$ ), 31.9 ( $C_{\gamma}H_{Val}$ ), 26.0 ( $C_{\delta}H_{Leu}$ ), 25.5 ( $C_{\delta}H_{Leu}$ ), 24.2 ( $CH_{3Leu}$ ), 23.8 ( $CH_{3Leu}$ ), 23.7 ( $CH_{iPr}$ ), 23.6 ( $CH_{iPr}$ ), 23.6 (2 x  $CH_{iPr}$ ), 22.5 ( $CH_3$ ), 22.5 ( $CH_3$ ), 22.4 ( $CH_{3Leu}$ ), 22.4 ( $CH_{3Leu}$ ), 20.1 ( $C_{\delta}H_{3Val}$ ), 20.1 ( $C_{\delta}H_{3Val}$ ), 19.5 ( $C_{\delta}H_{3Ala}$ ), 19.4 ( $C_{\delta}H_{3Ala}$ ), 18.6 ( $C_{\delta}H_{3Val}$ ), 18.4 ( $C_{\delta}H_{3Val}$ ). IR (film,  $cm^{-1}$ ):  $\nu_{max}$  = 3350, 2962, 2929, 1625, 1574, 1480; **HRMS** (ESI<sup>+</sup>):  $m/z$  calcd for  $C_{31}H_{54}O_5N_8Na$  [M+Na]<sup>+</sup> 641.4115, found 641.4101.

# Hydrogen Bonding of 2d, 7e and 8c

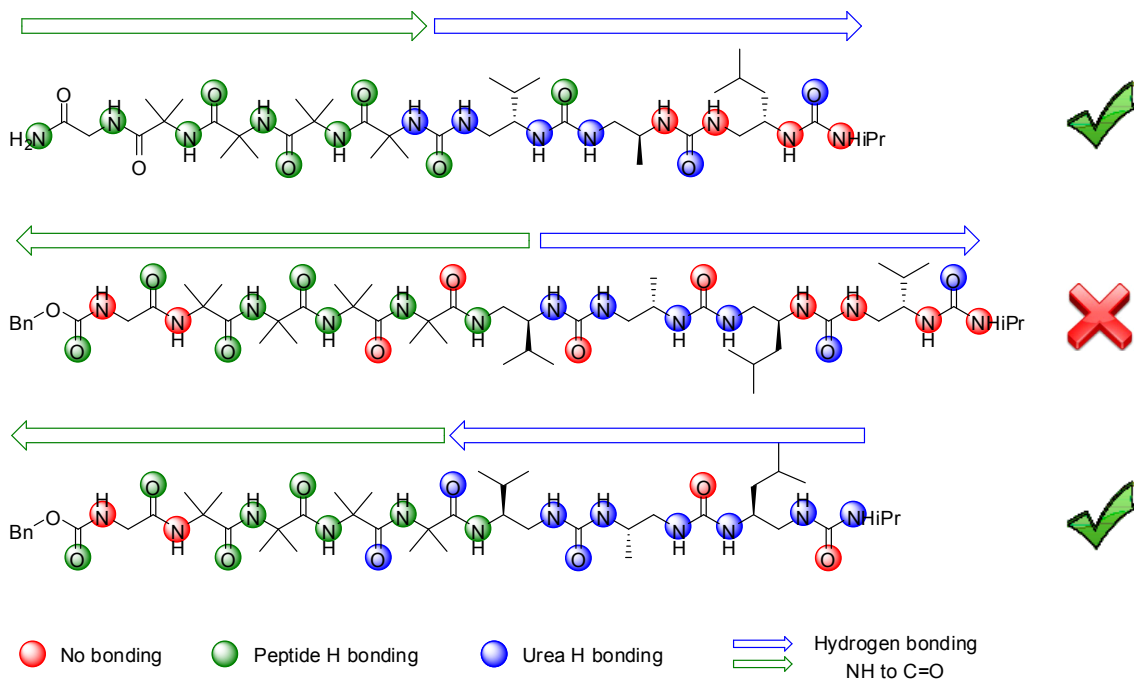

## CD spectra

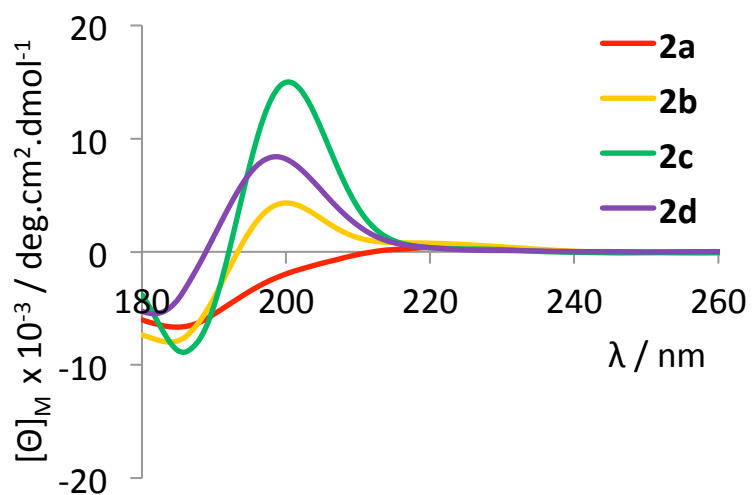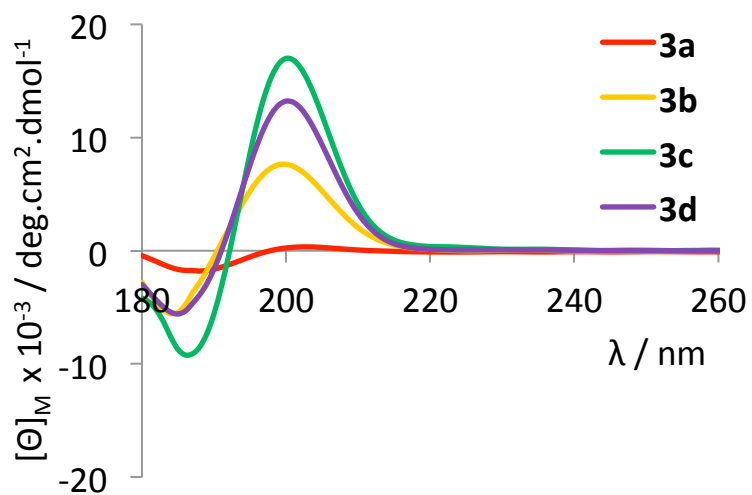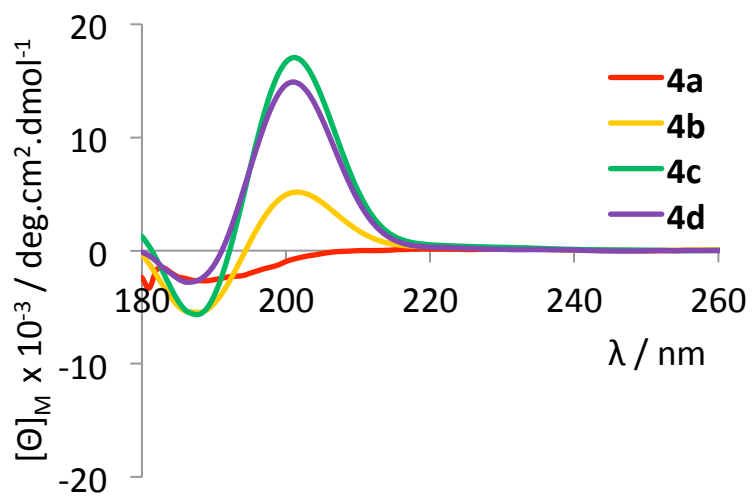



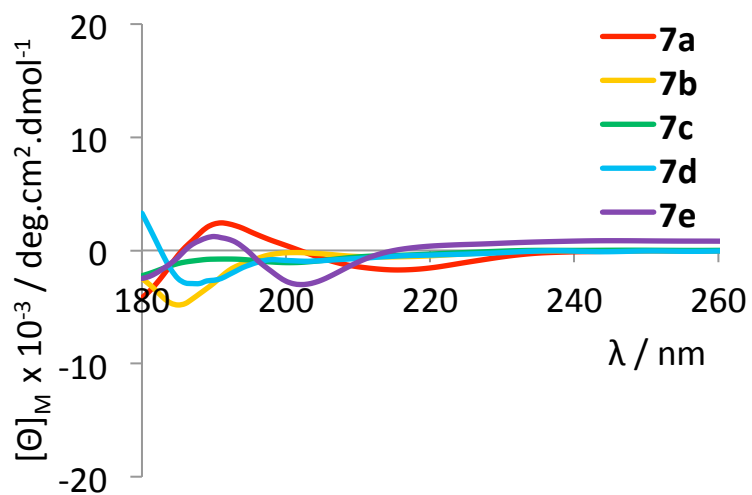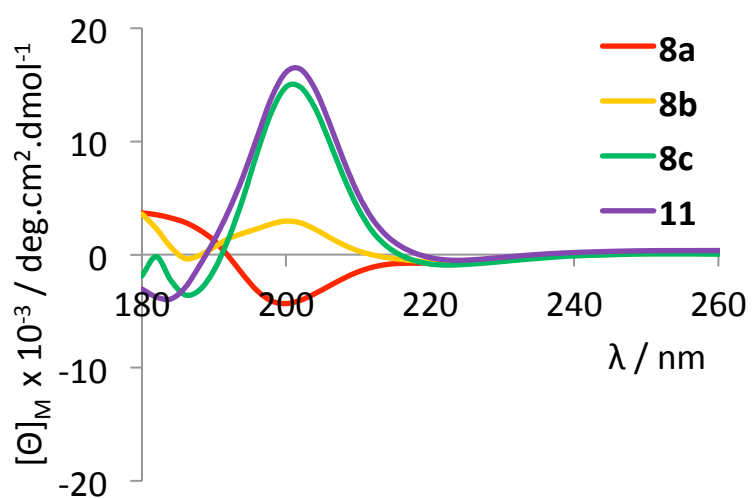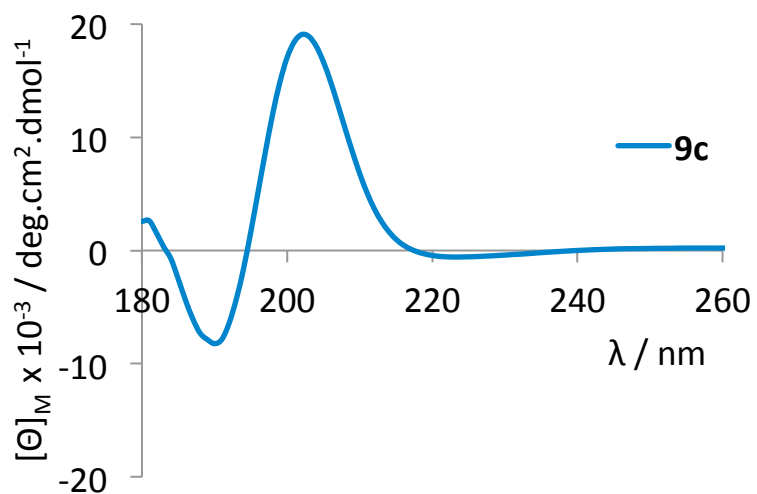

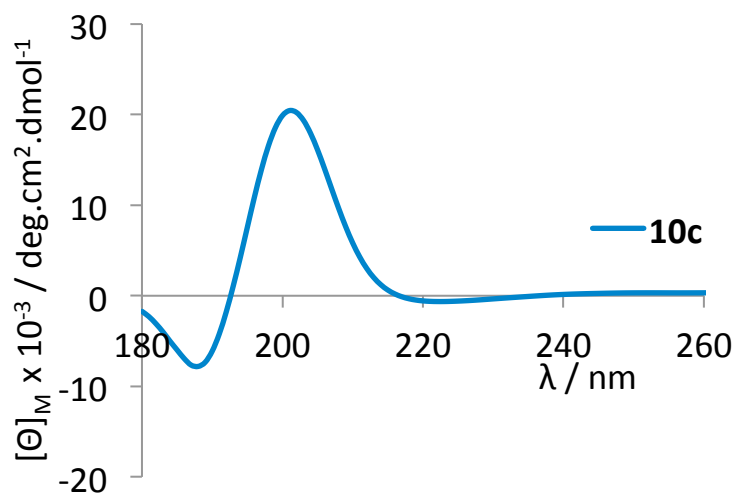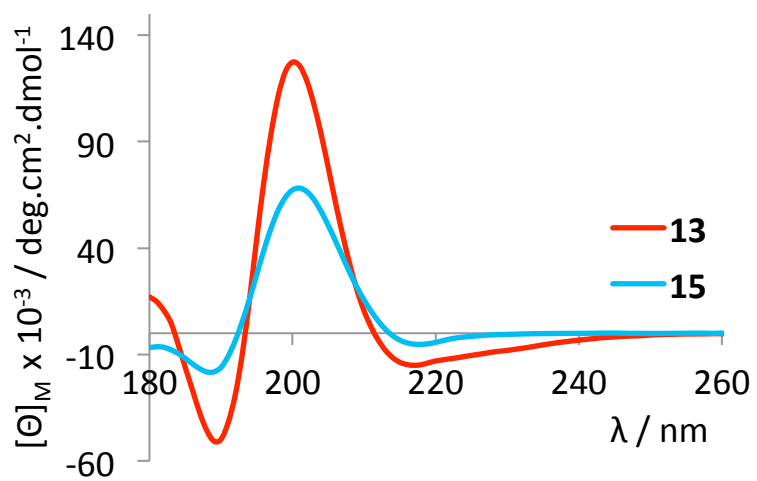

# VT-NMR $^{13}\text{C}$ of 11 between $-80$ and $40^\circ\text{C}$

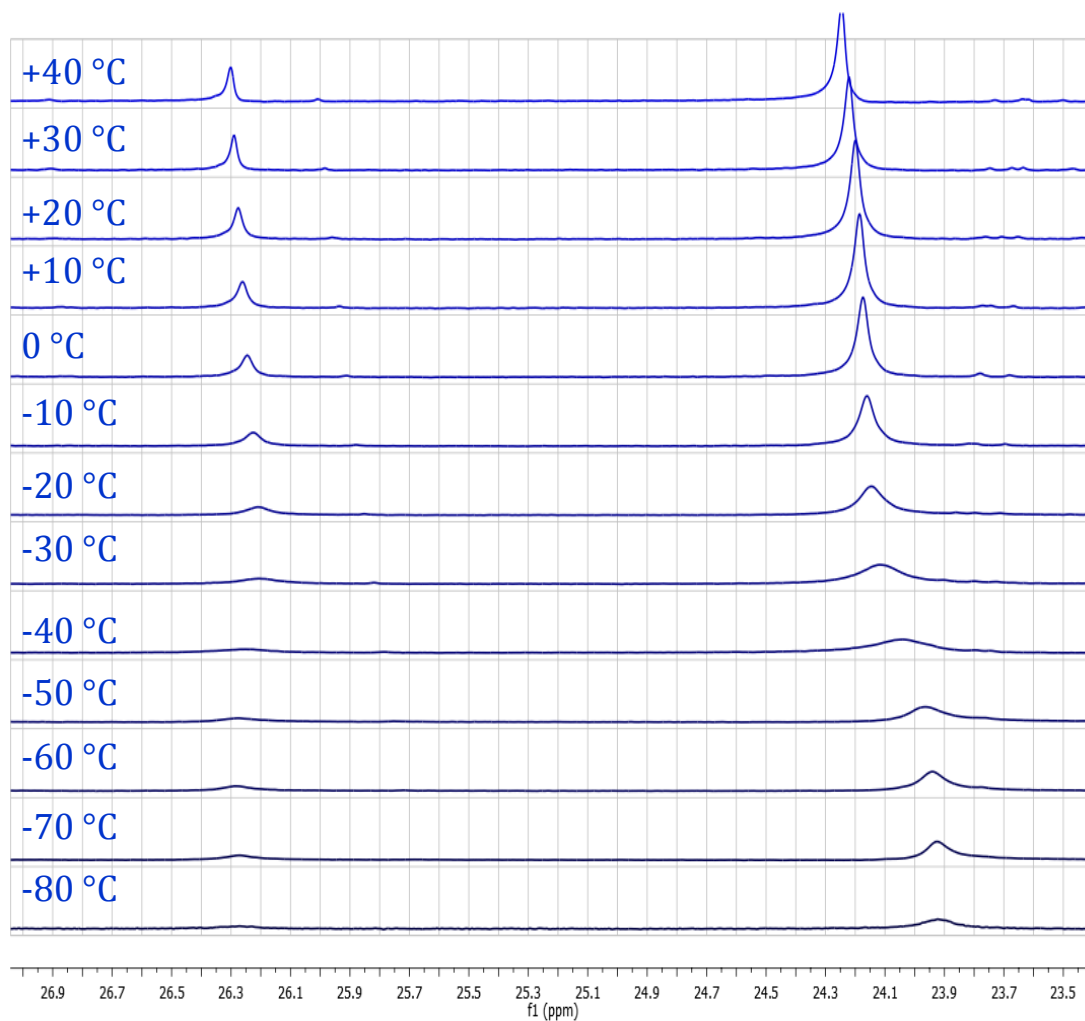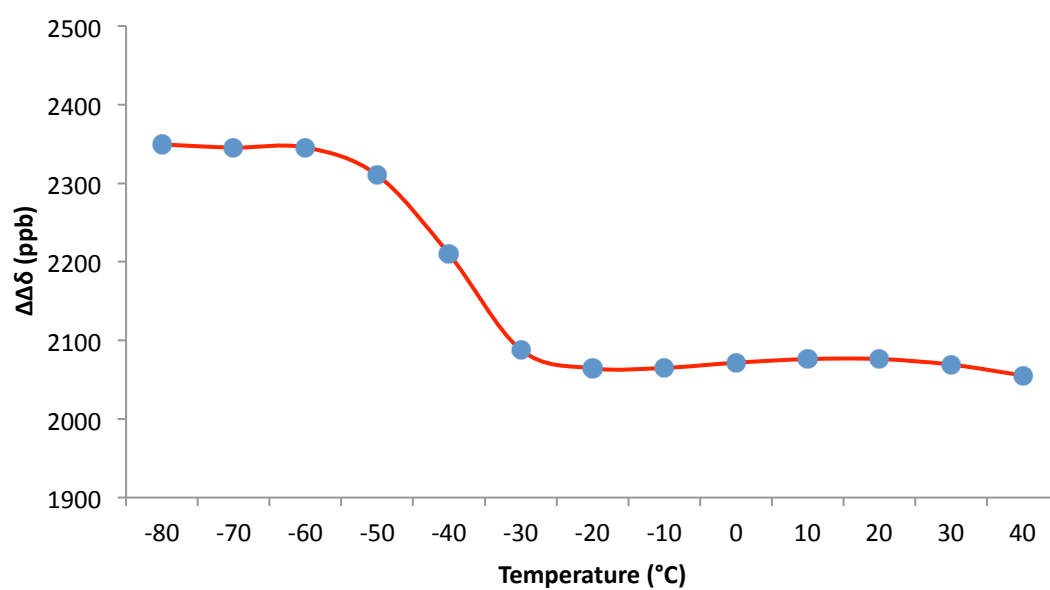

# VT-NMR $^1\text{H}$ of 11 between 5 and 38 °C

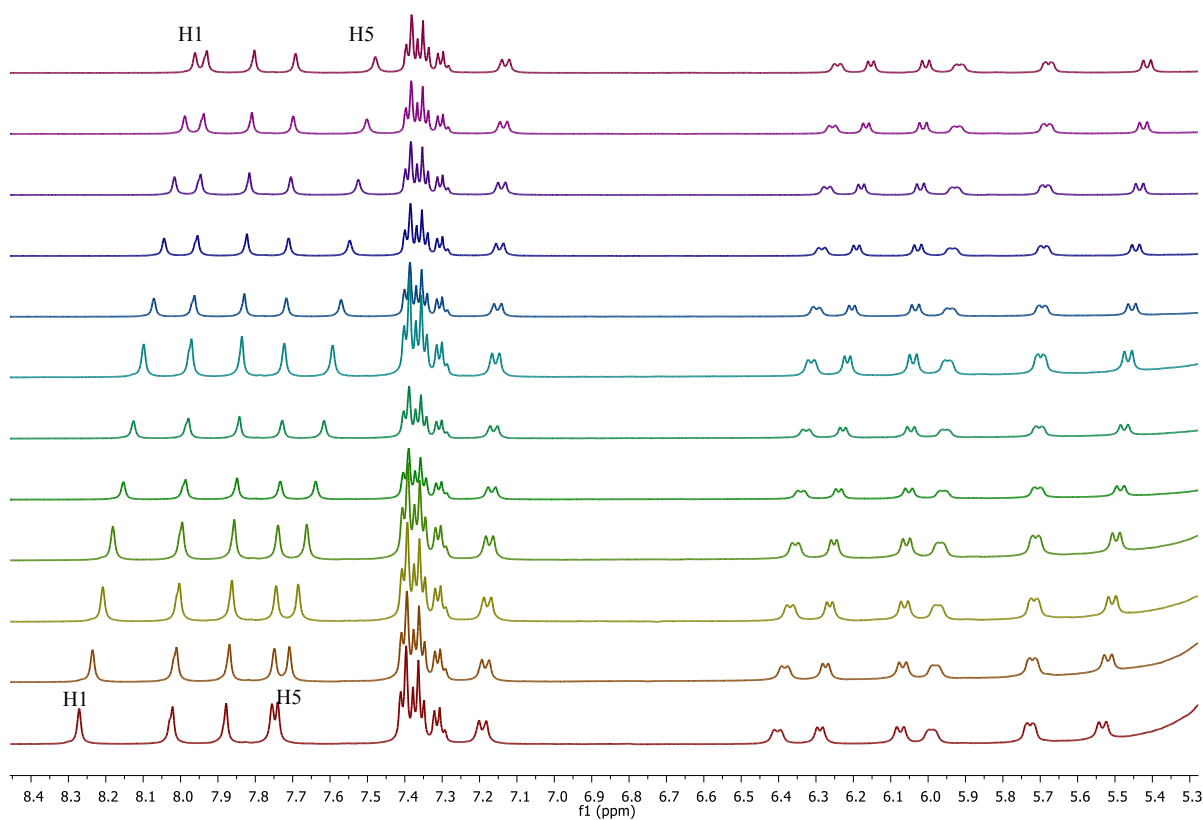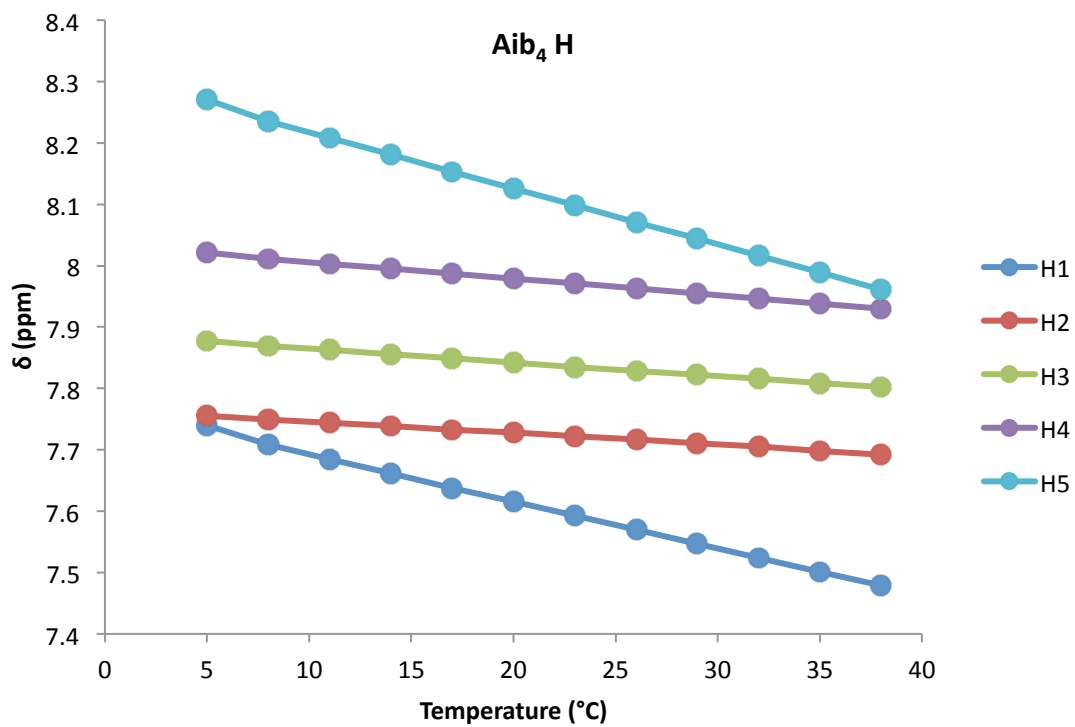

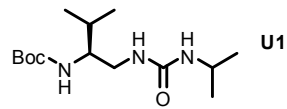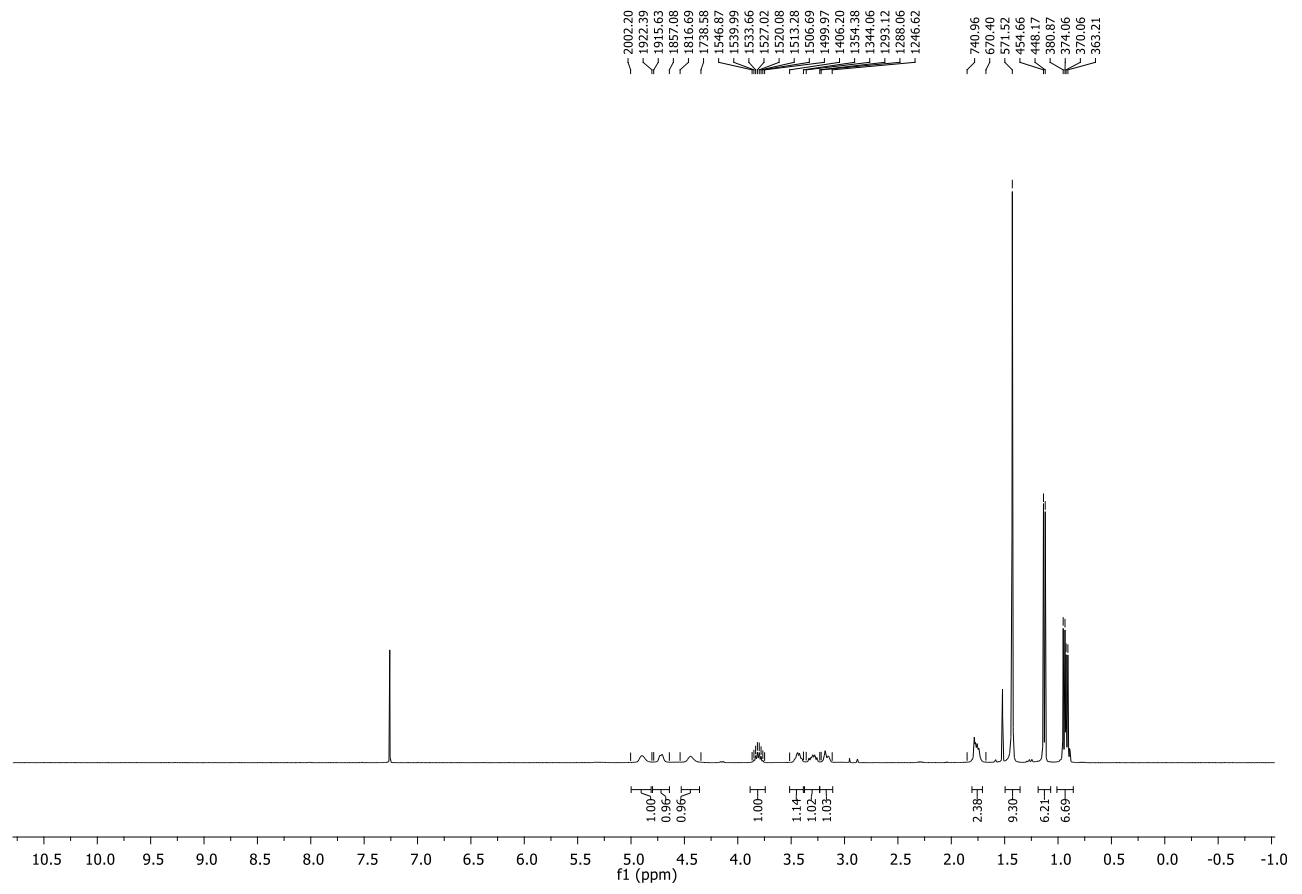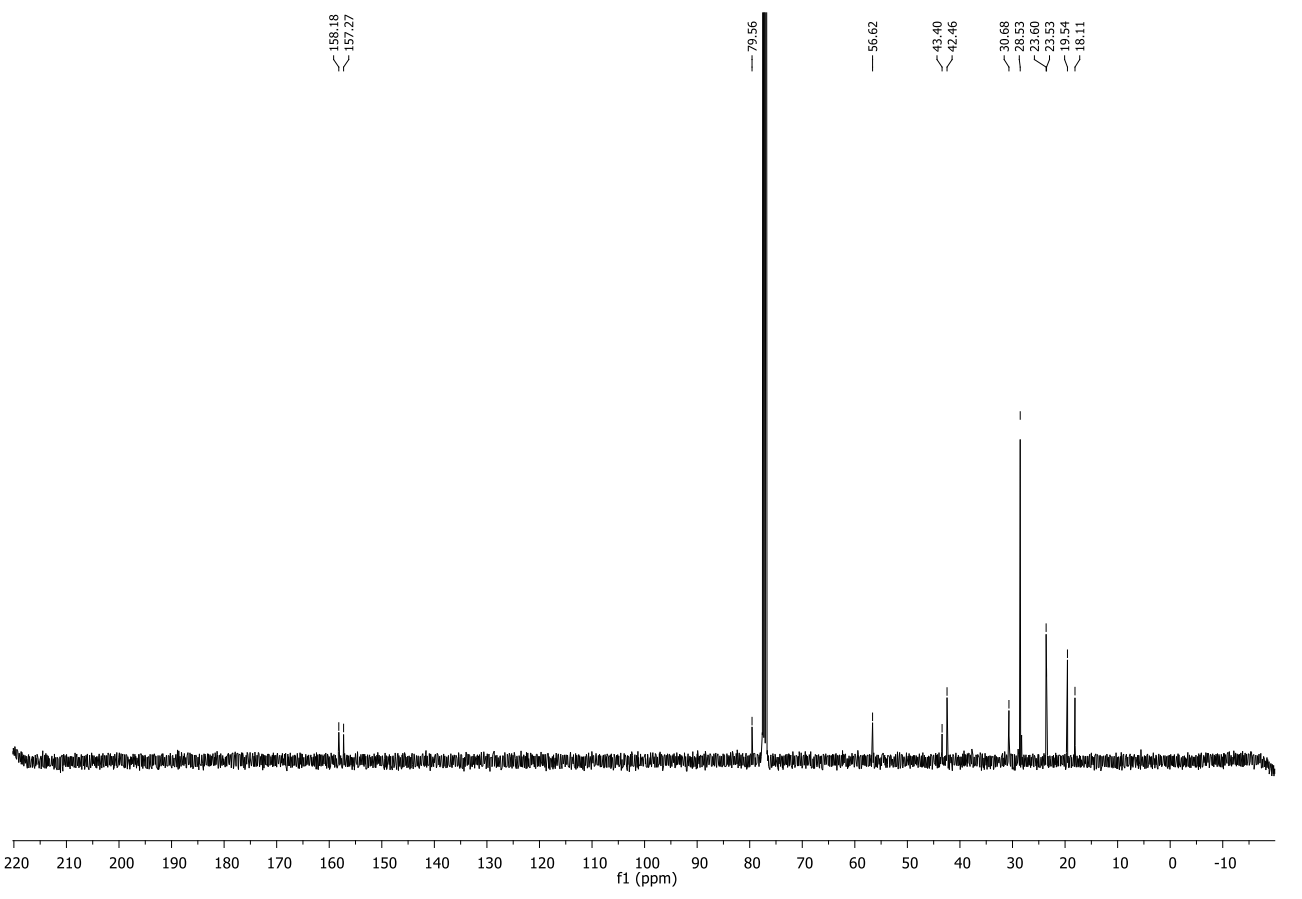

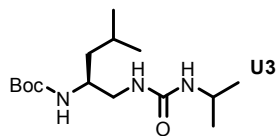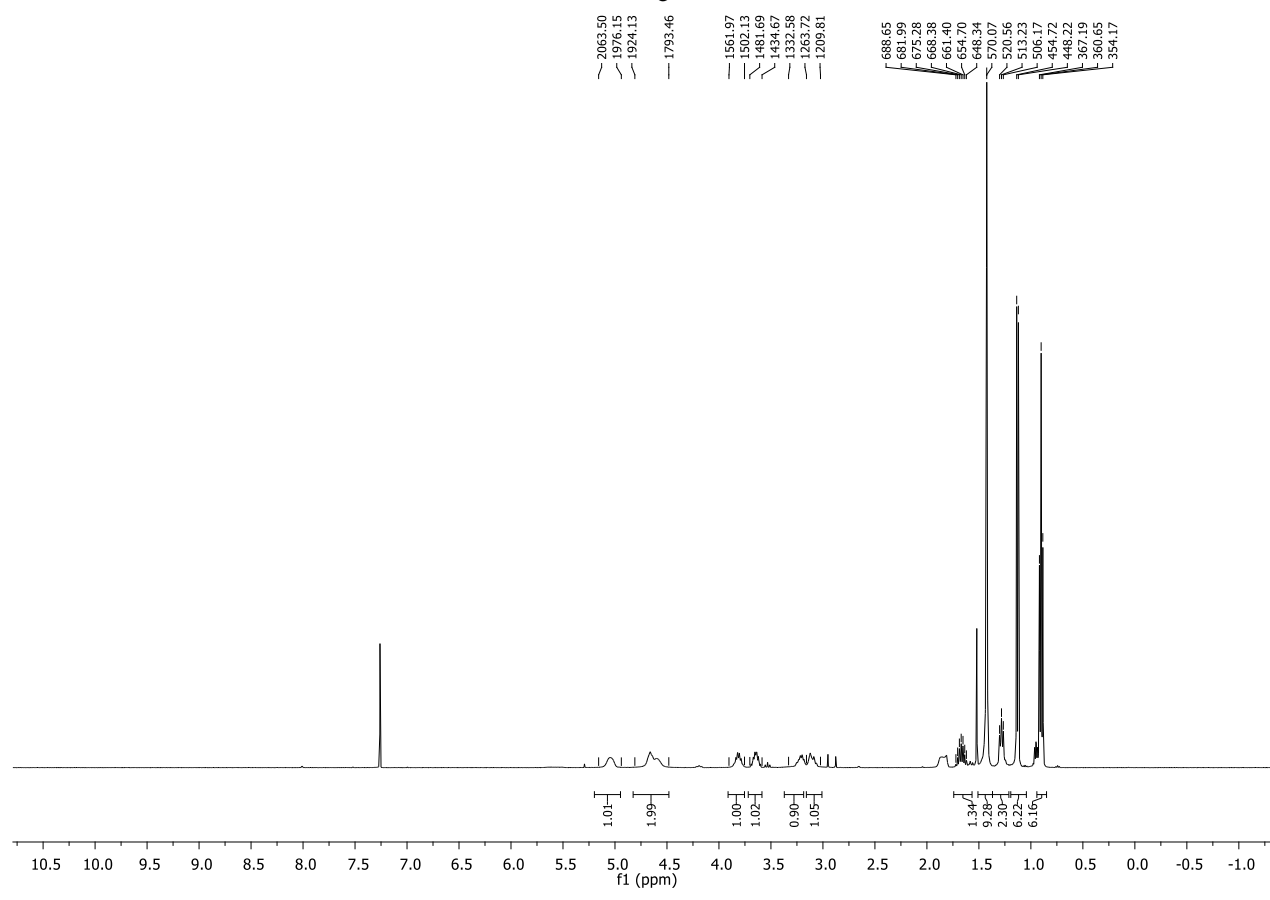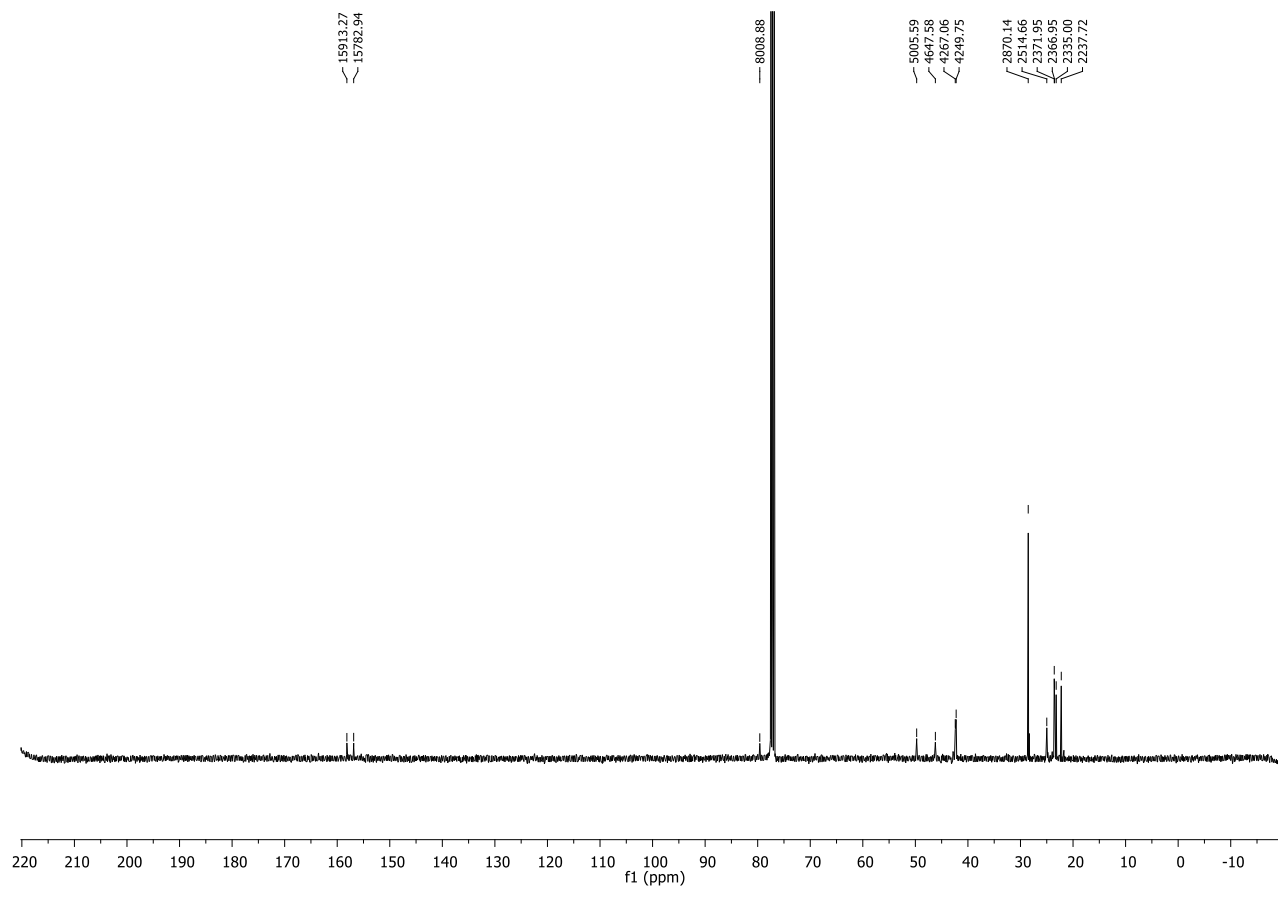

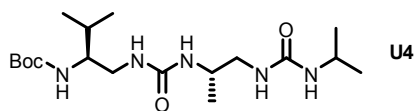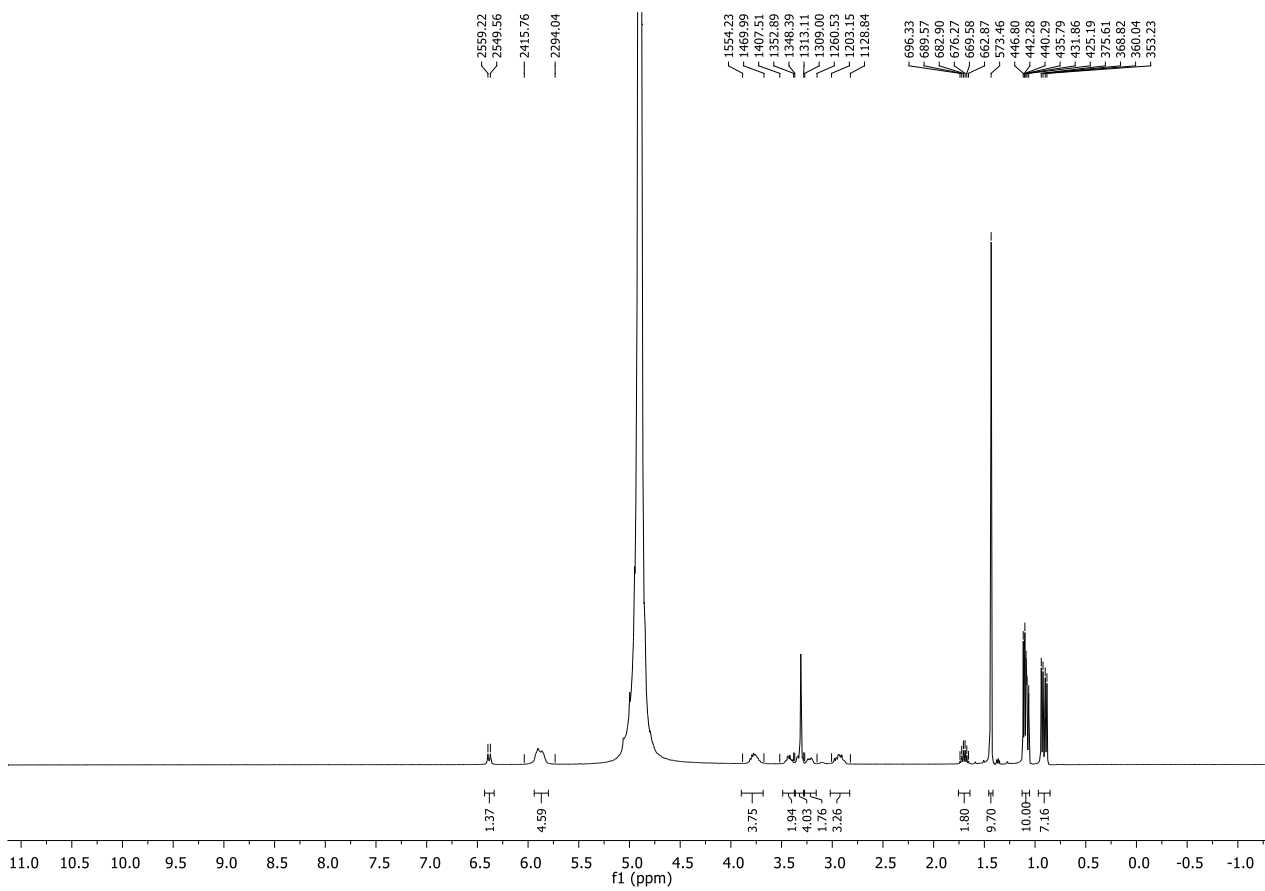

160.78  
160.61  
158.82

79.82

57.61

47.61  
46.87  
43.19  
42.89

31.70  
28.71  
23.47  
23.43  
19.81  
18.97  
18.34

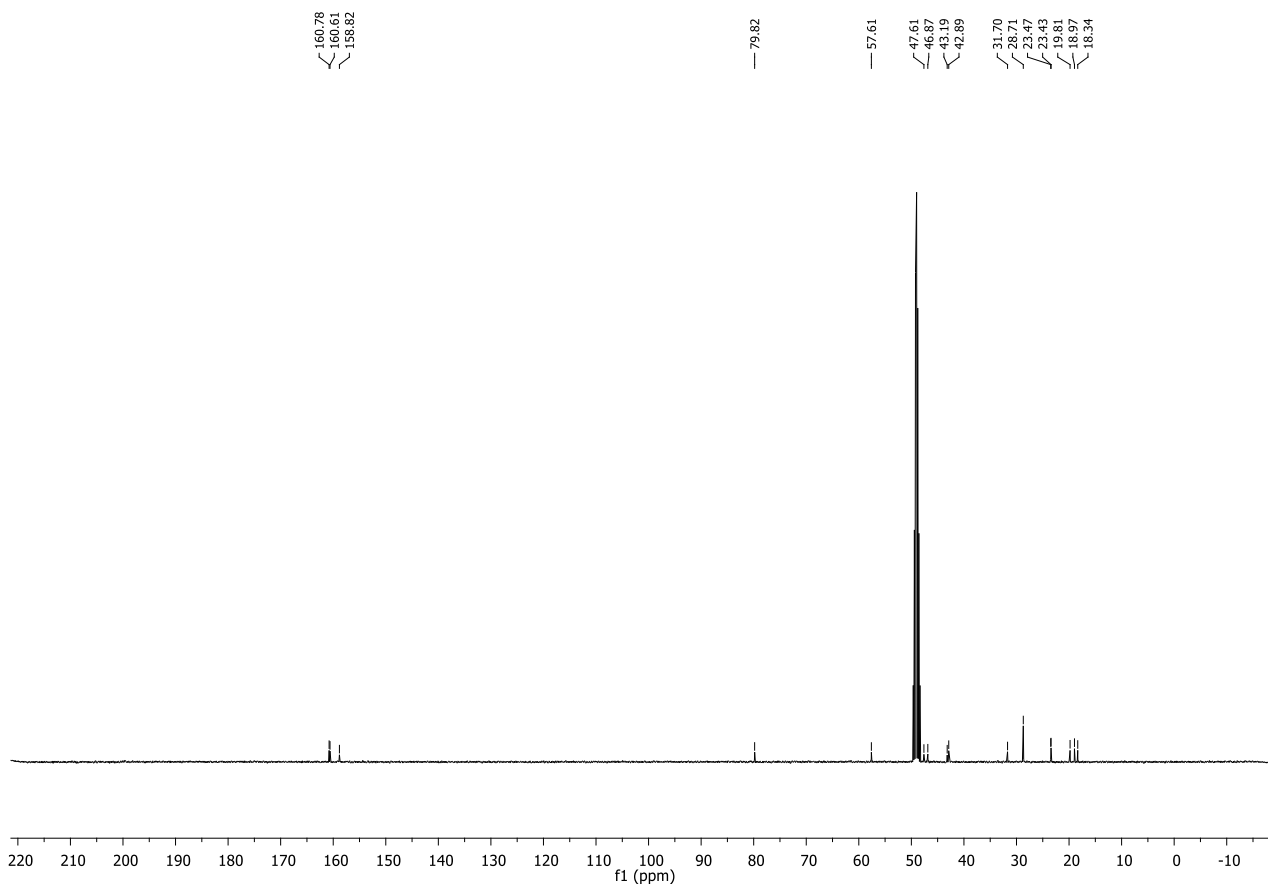

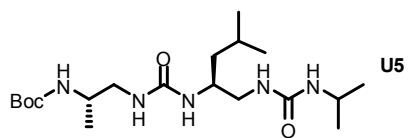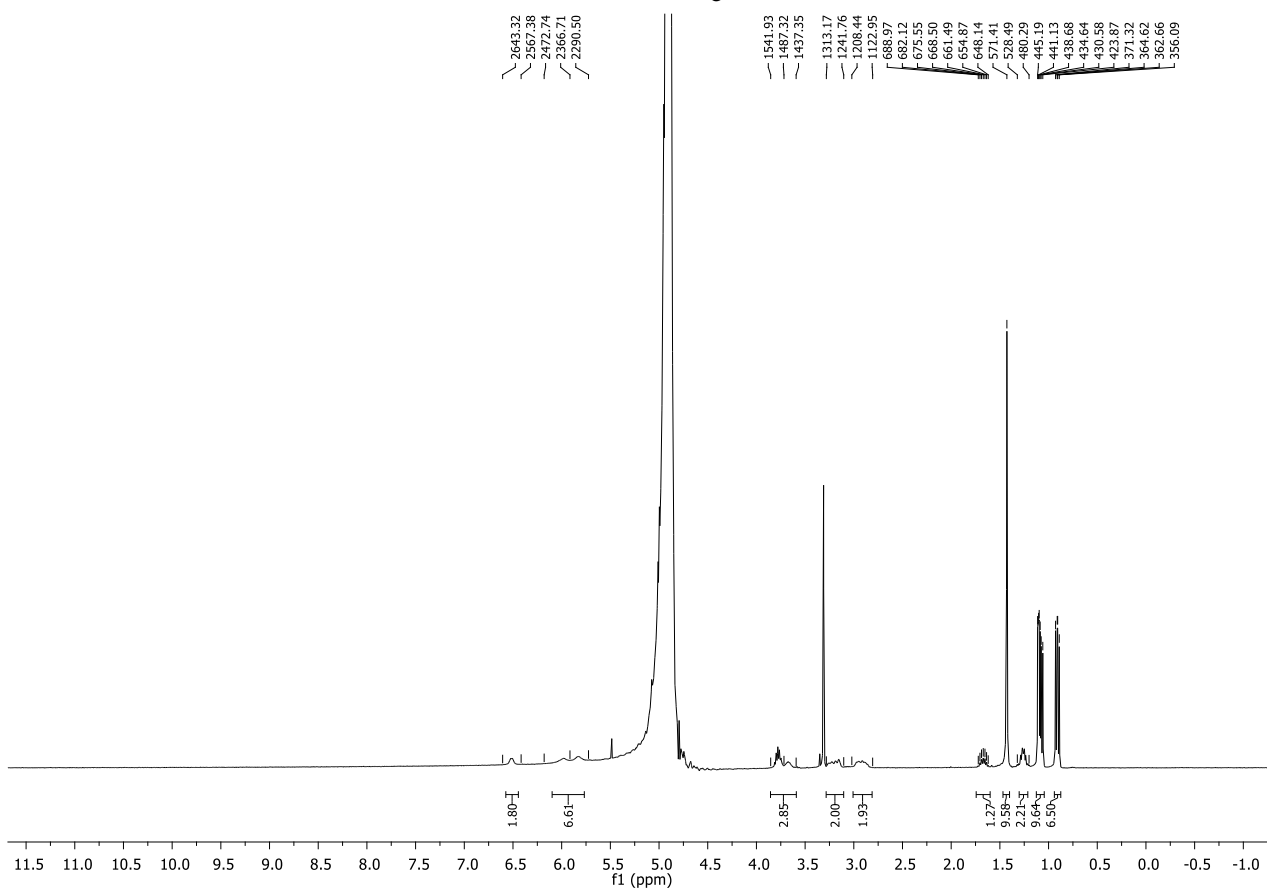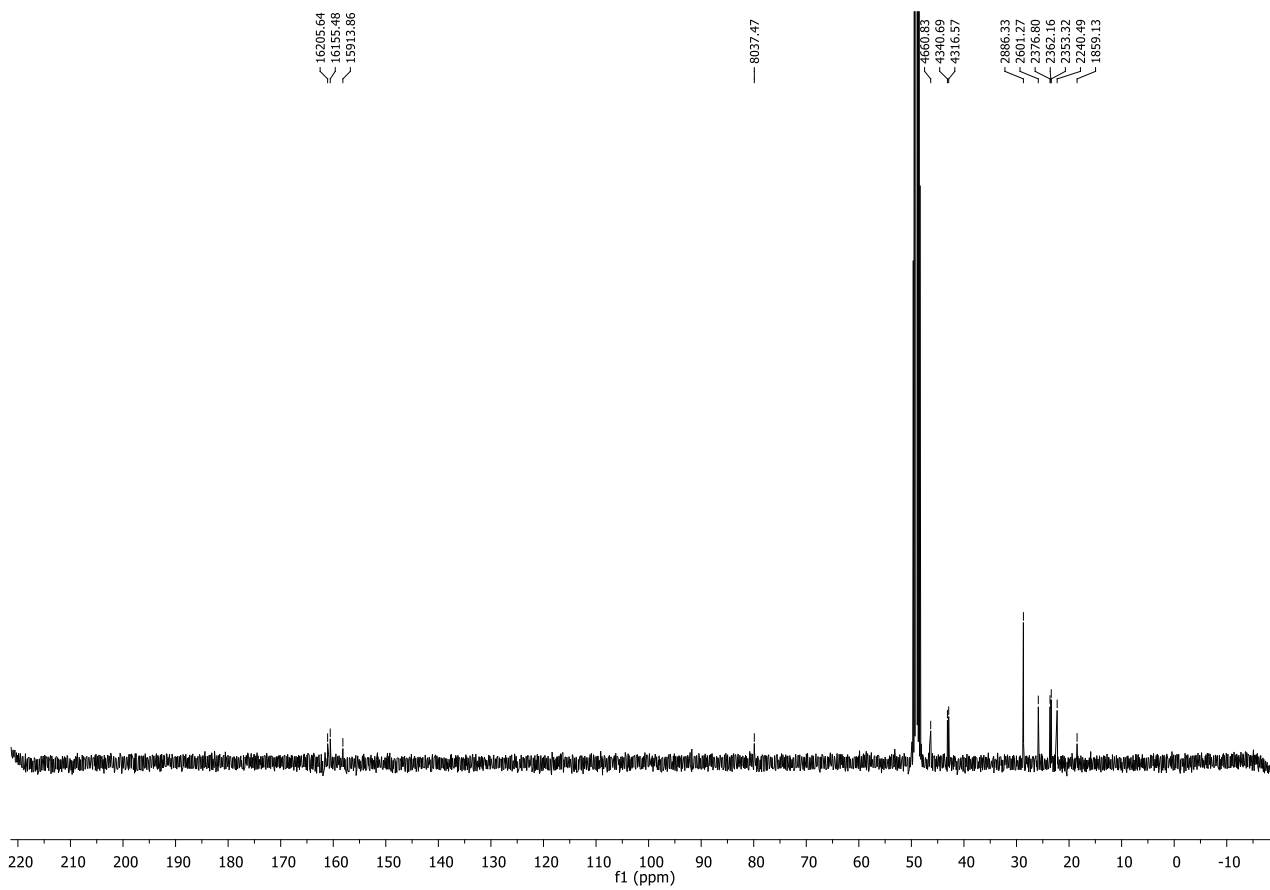



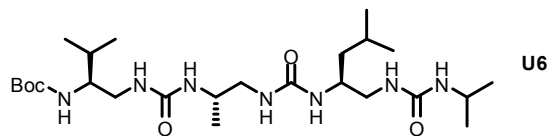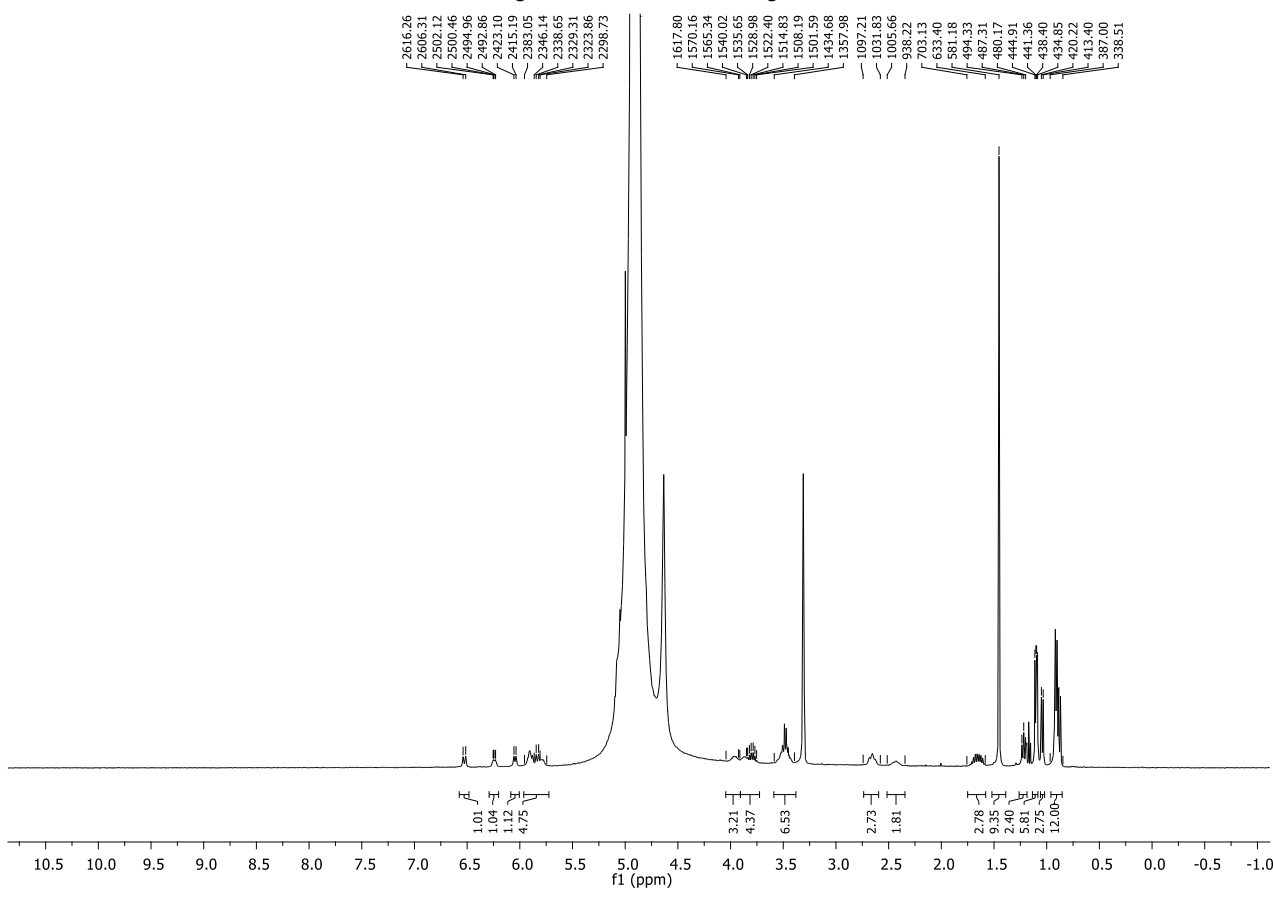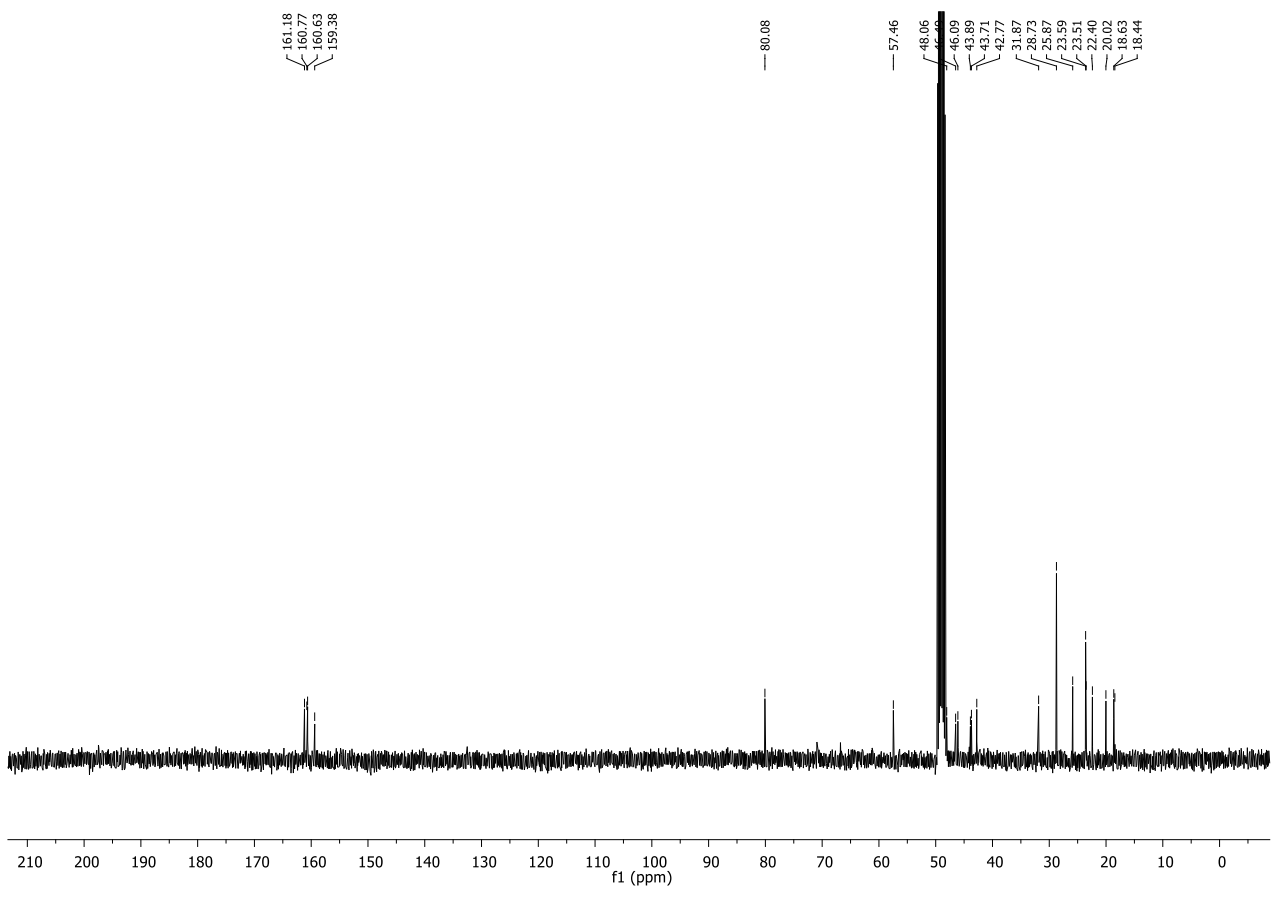

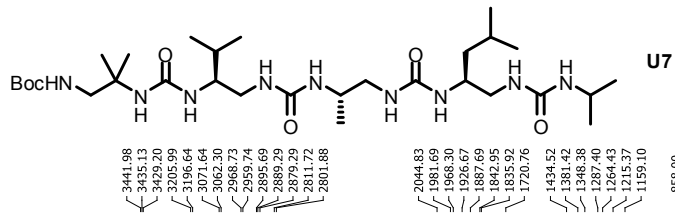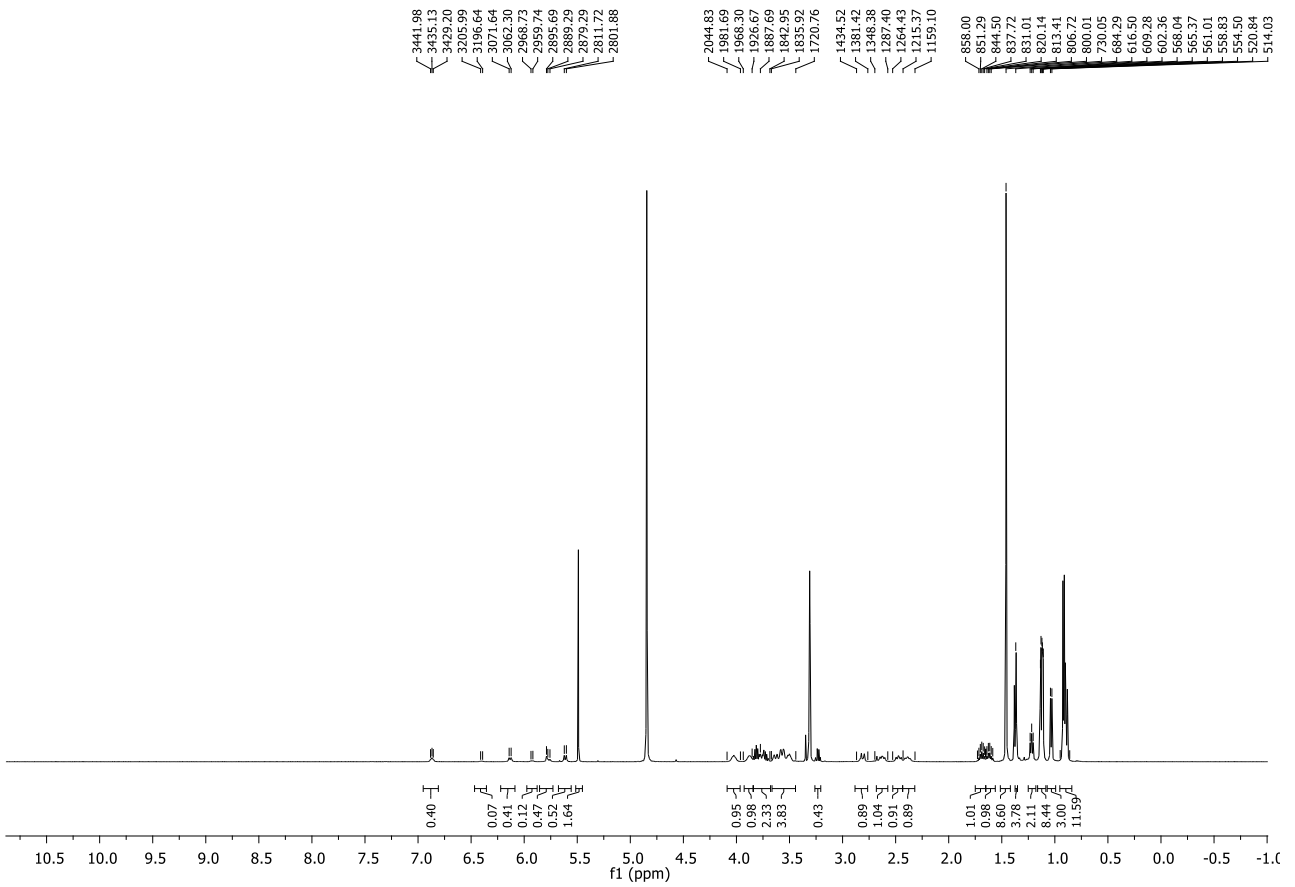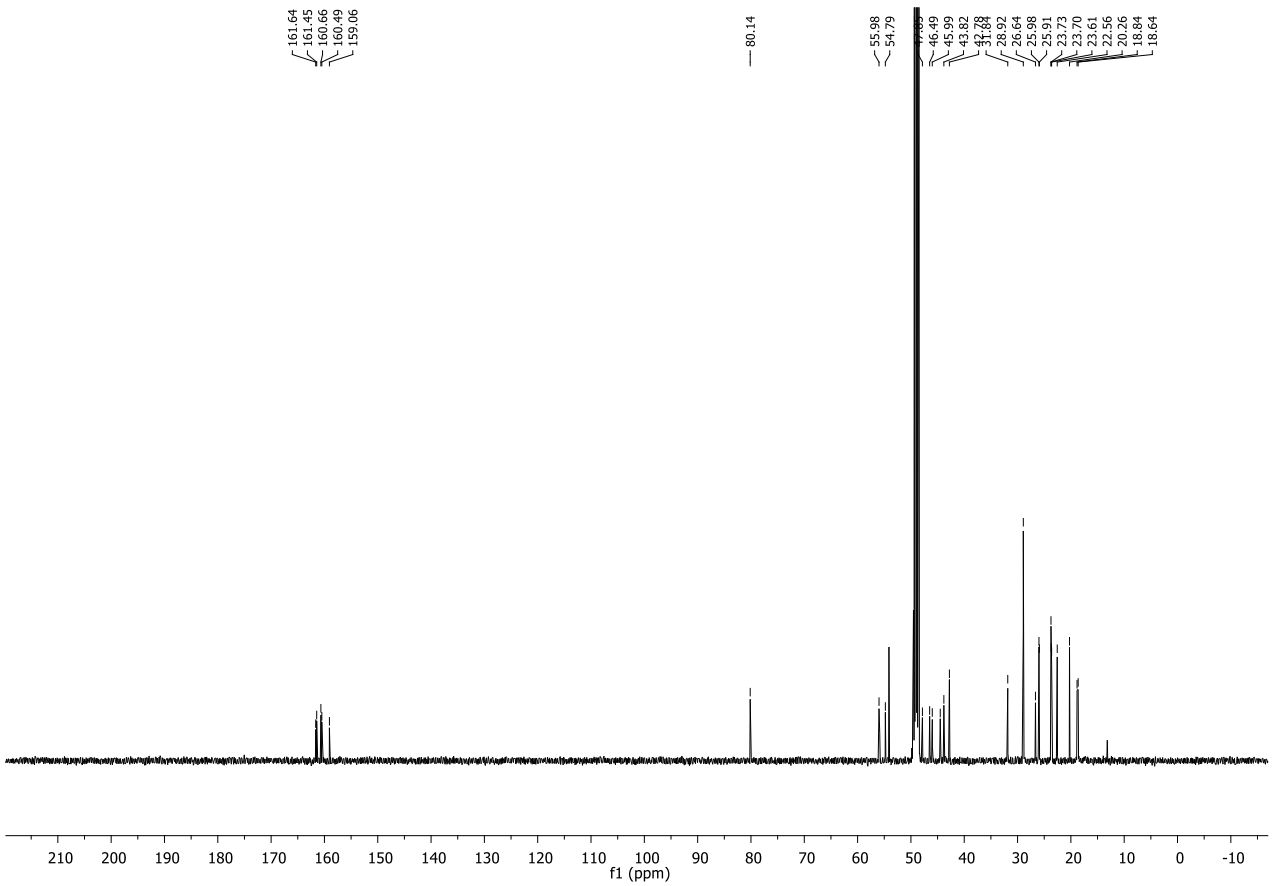

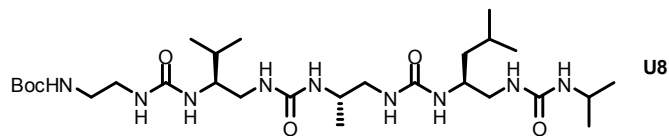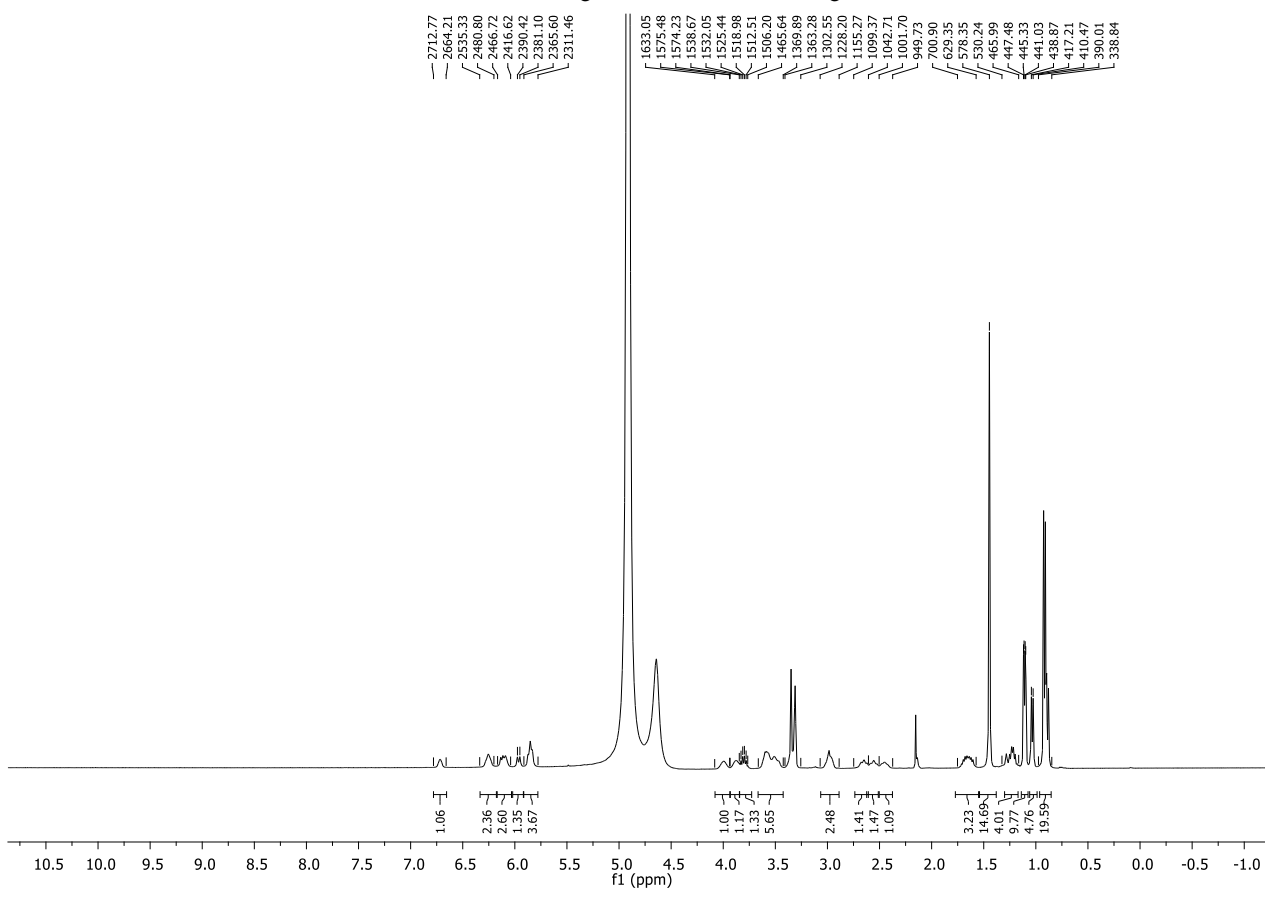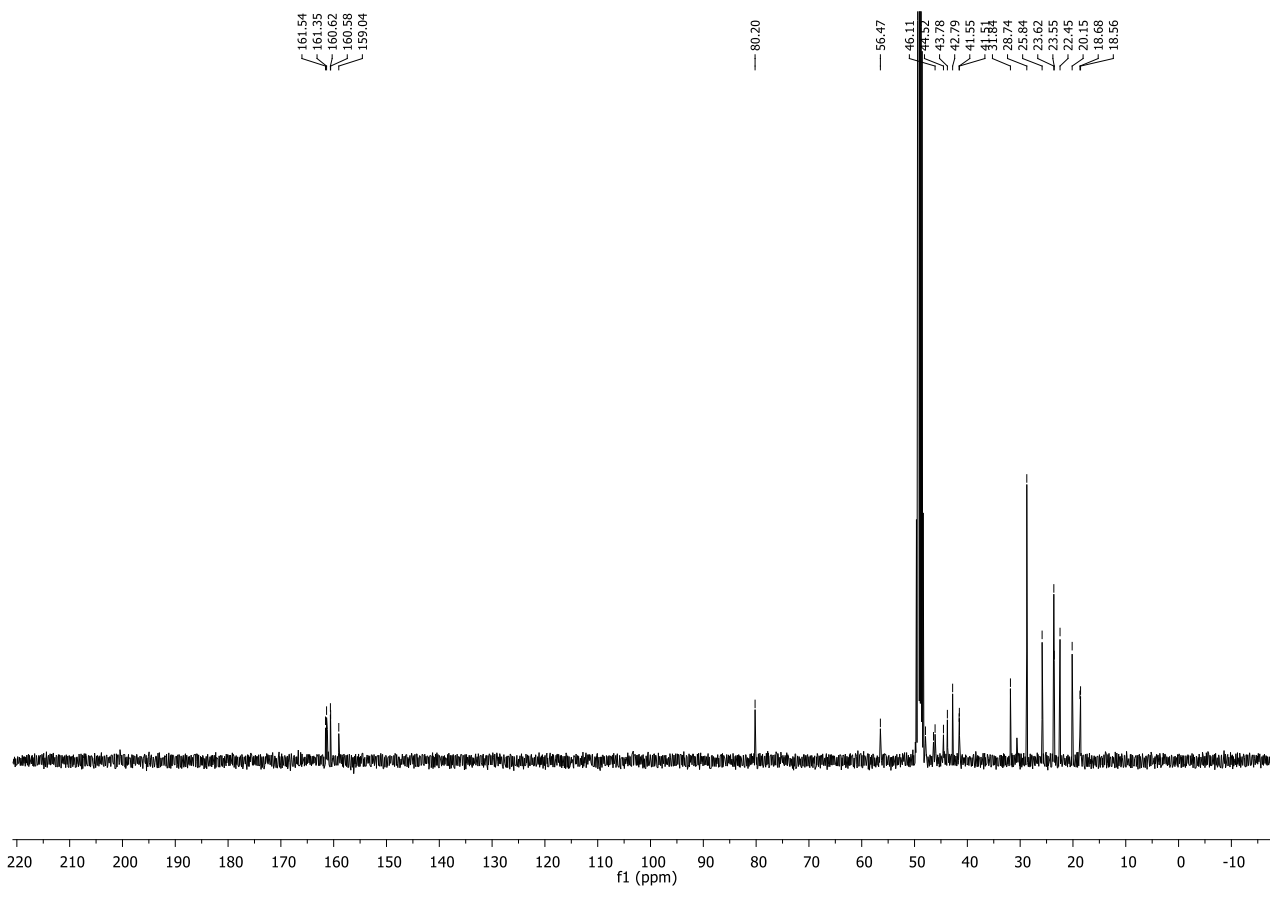

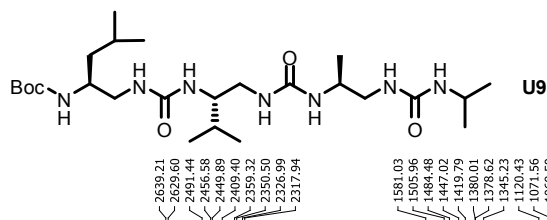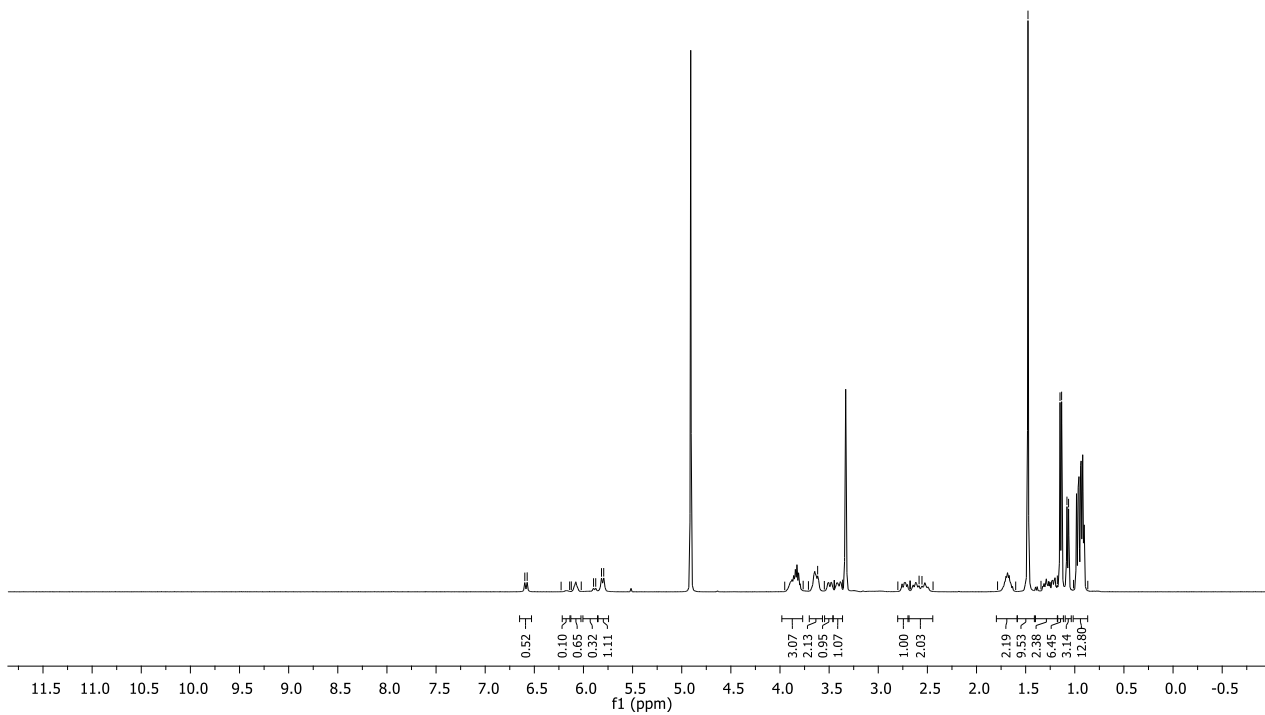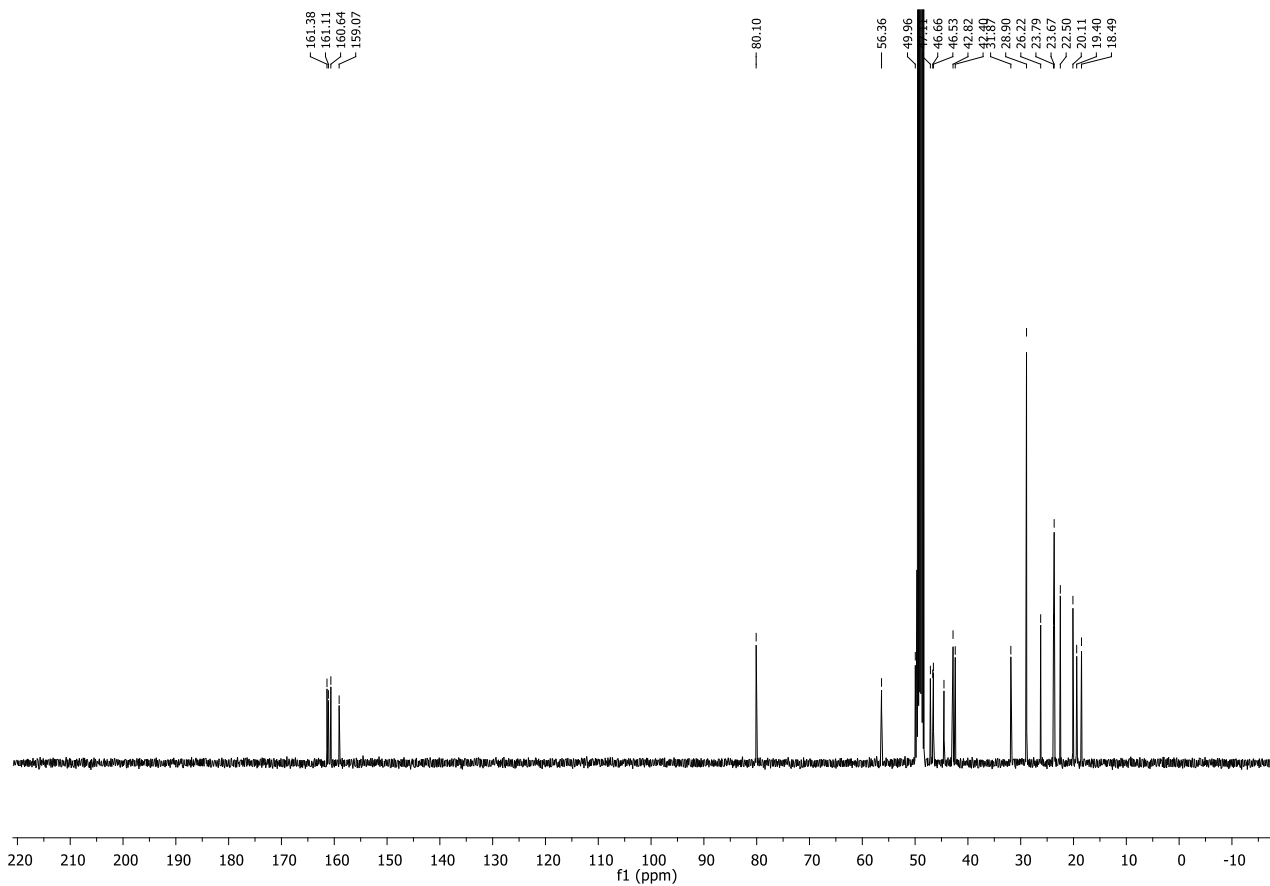

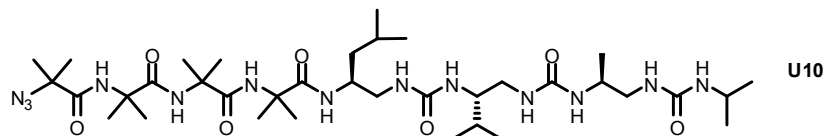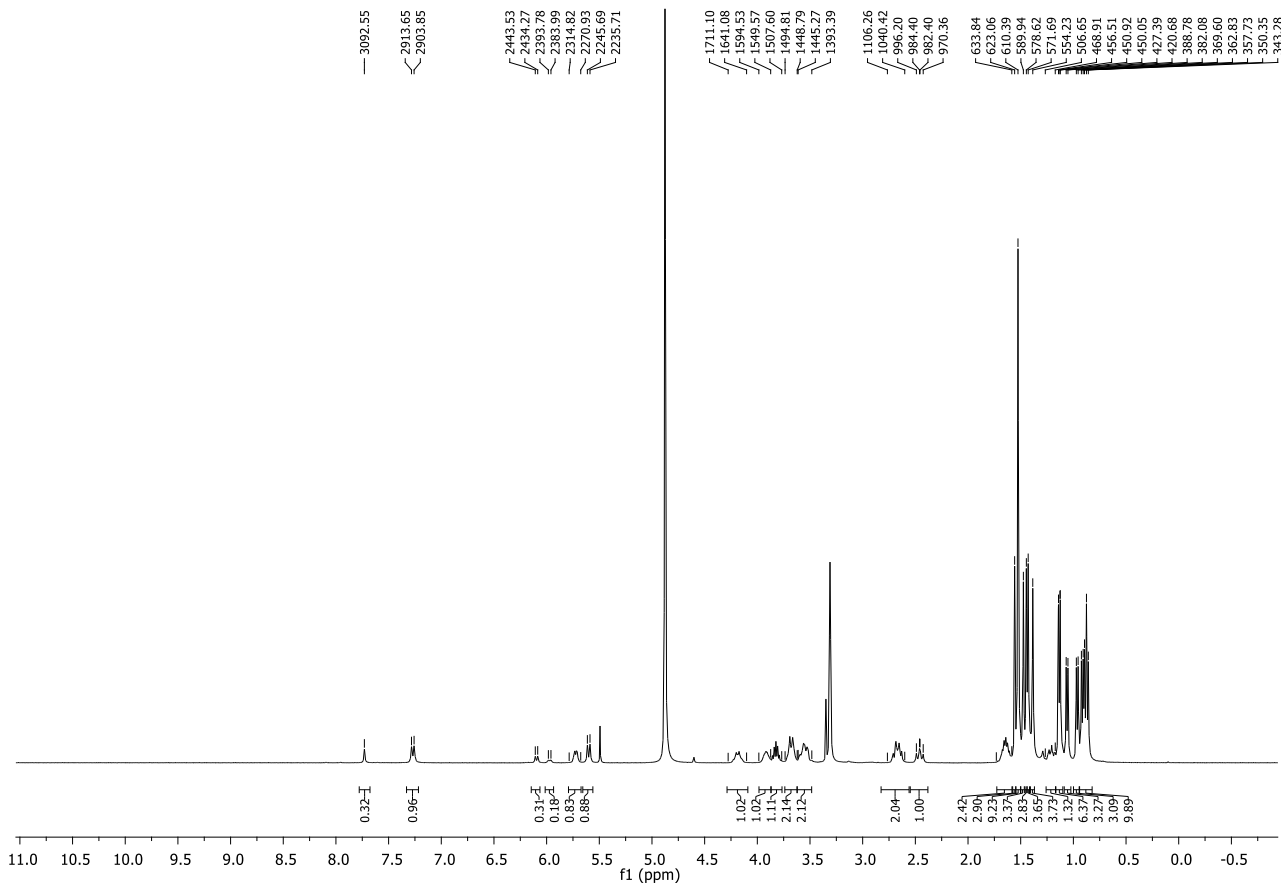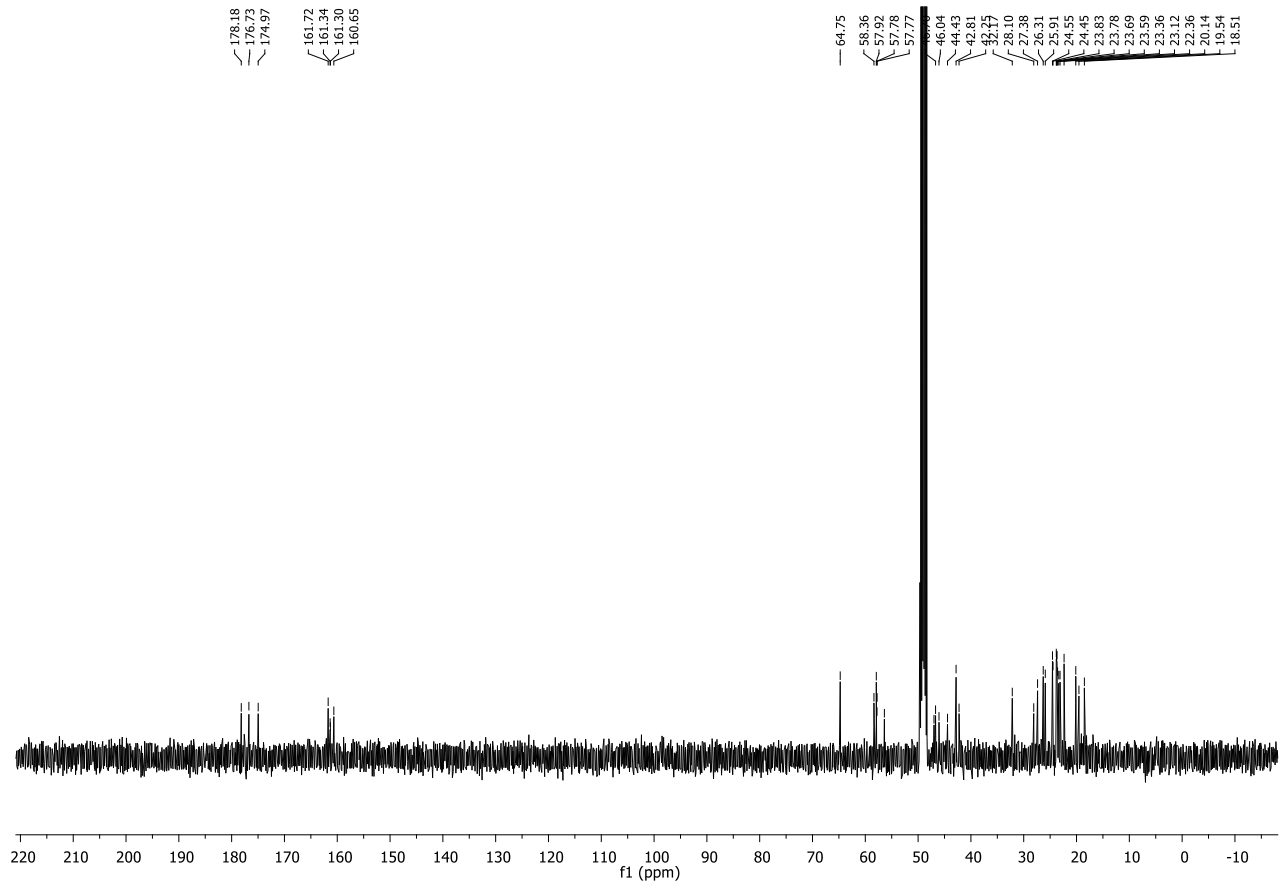

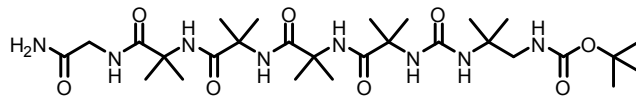

3

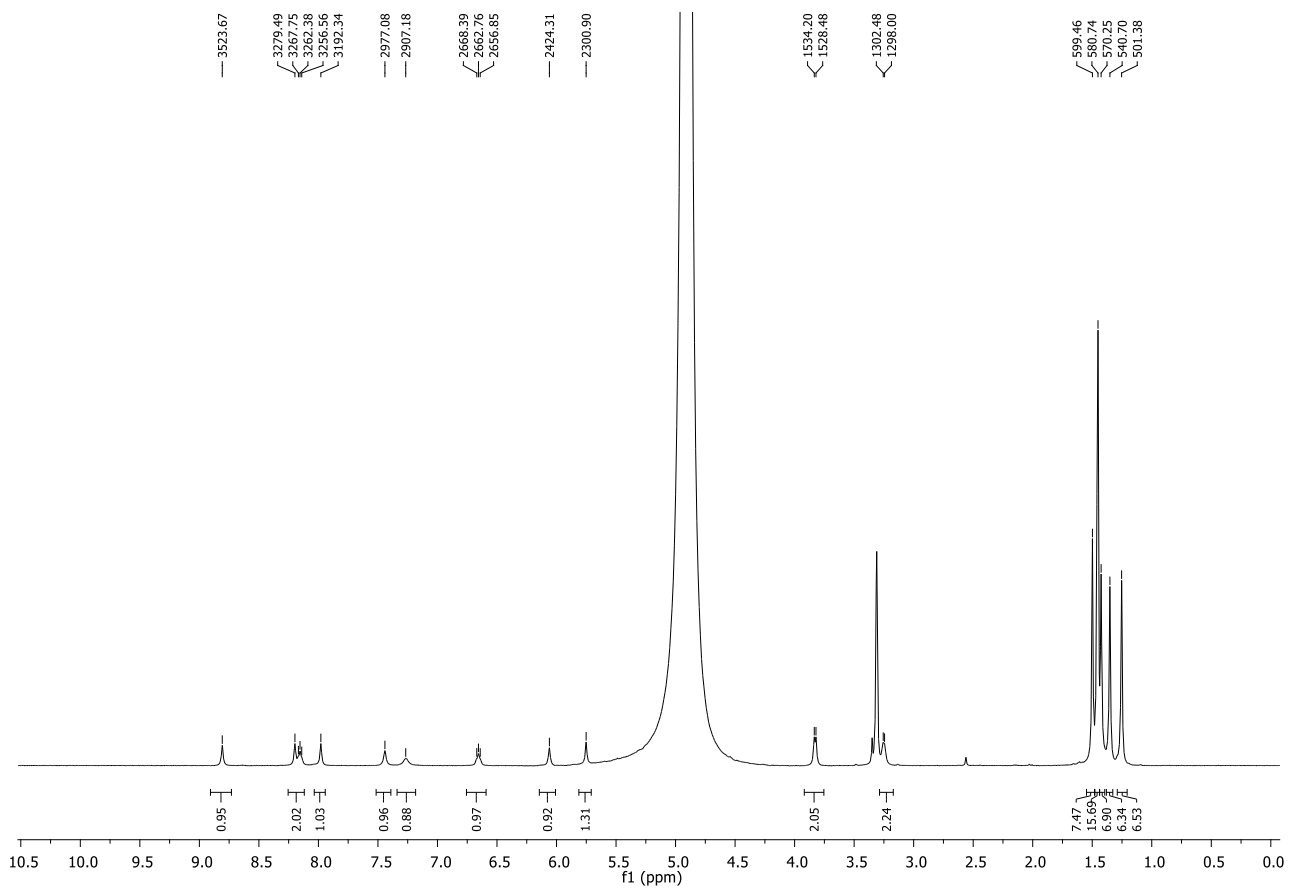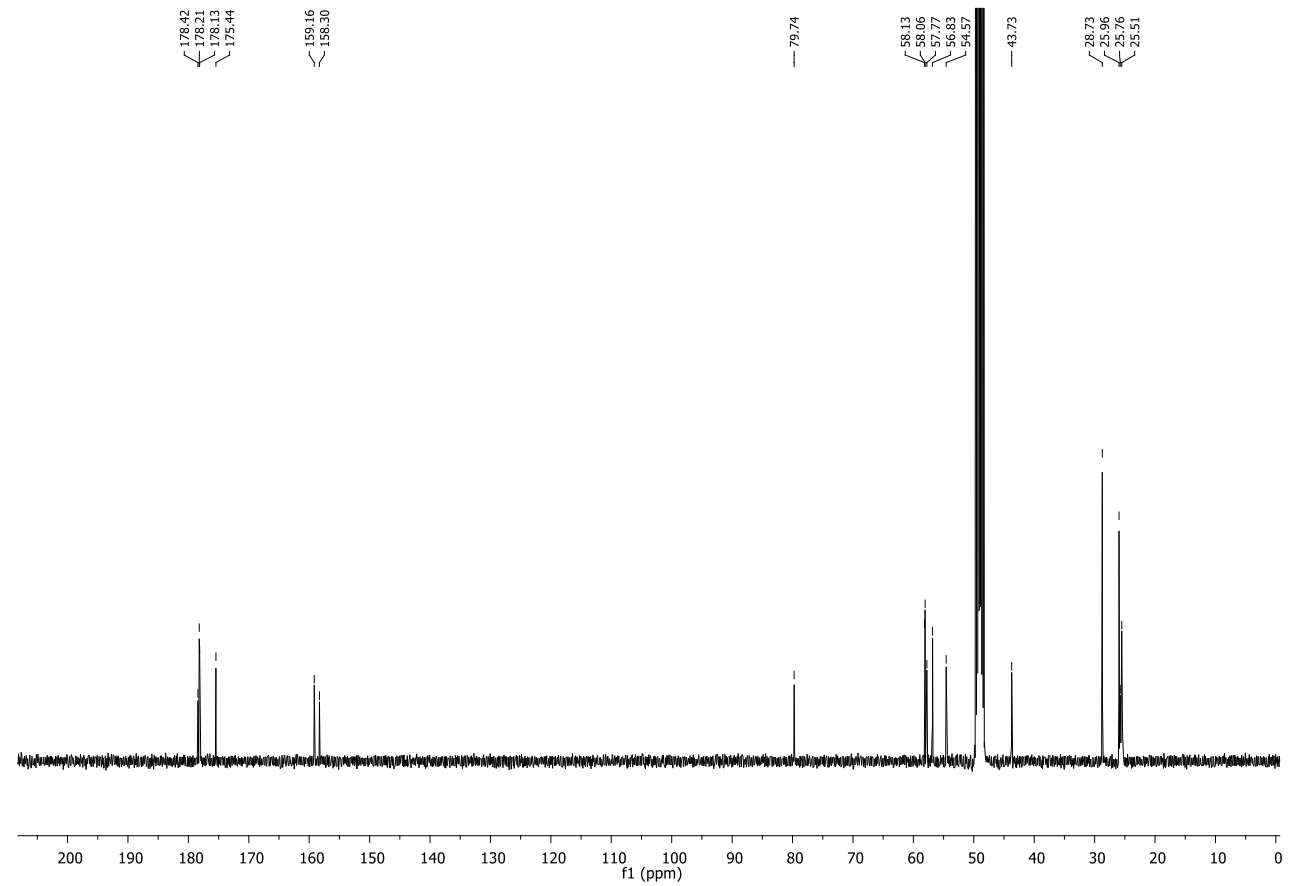

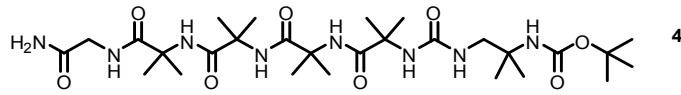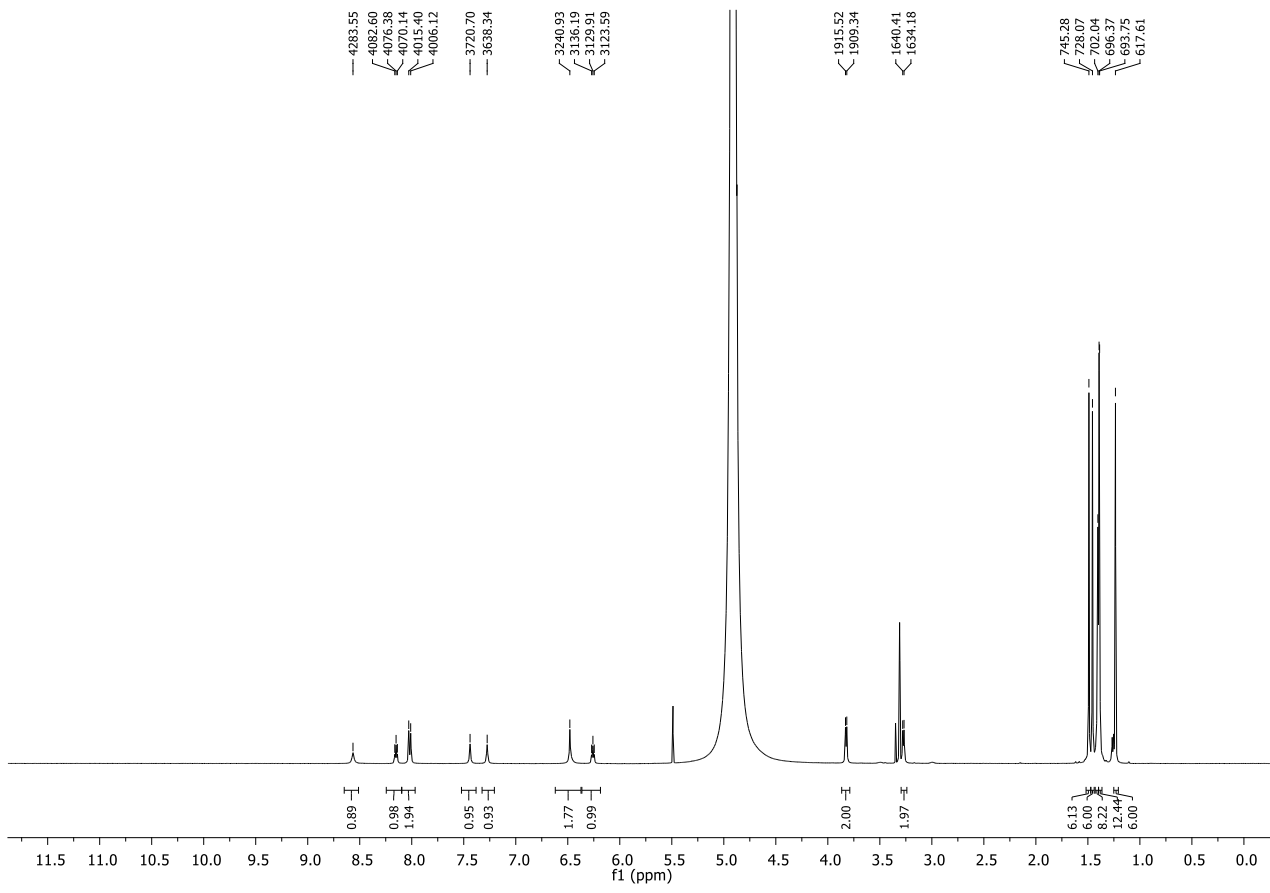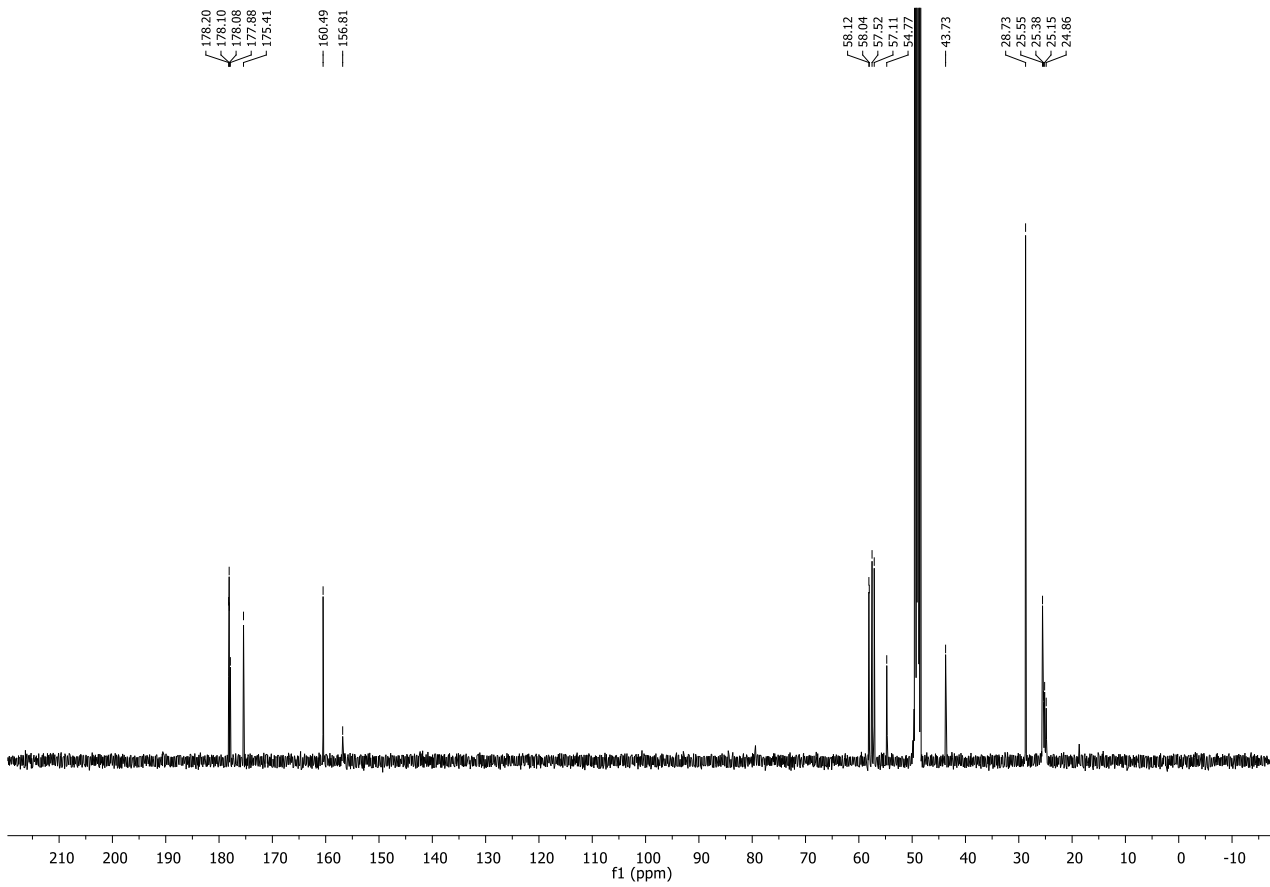

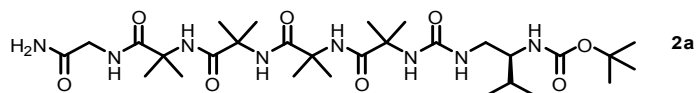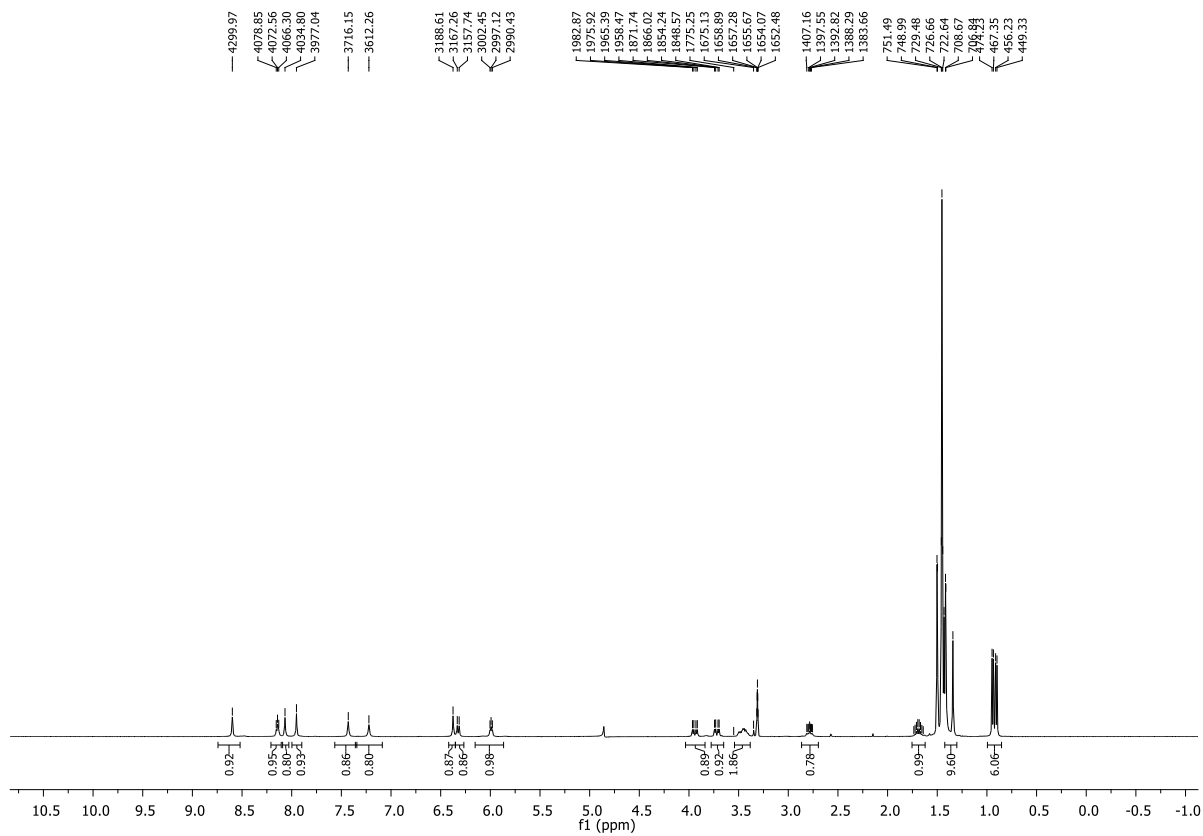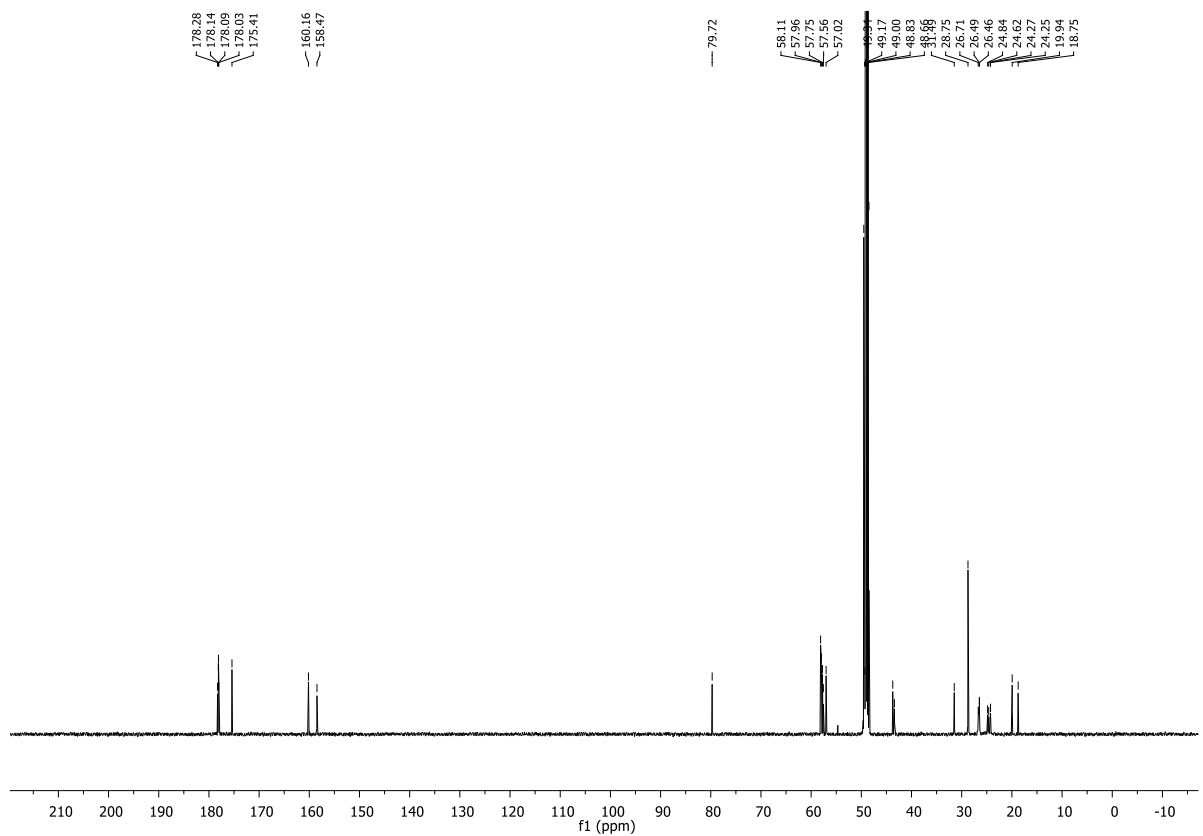



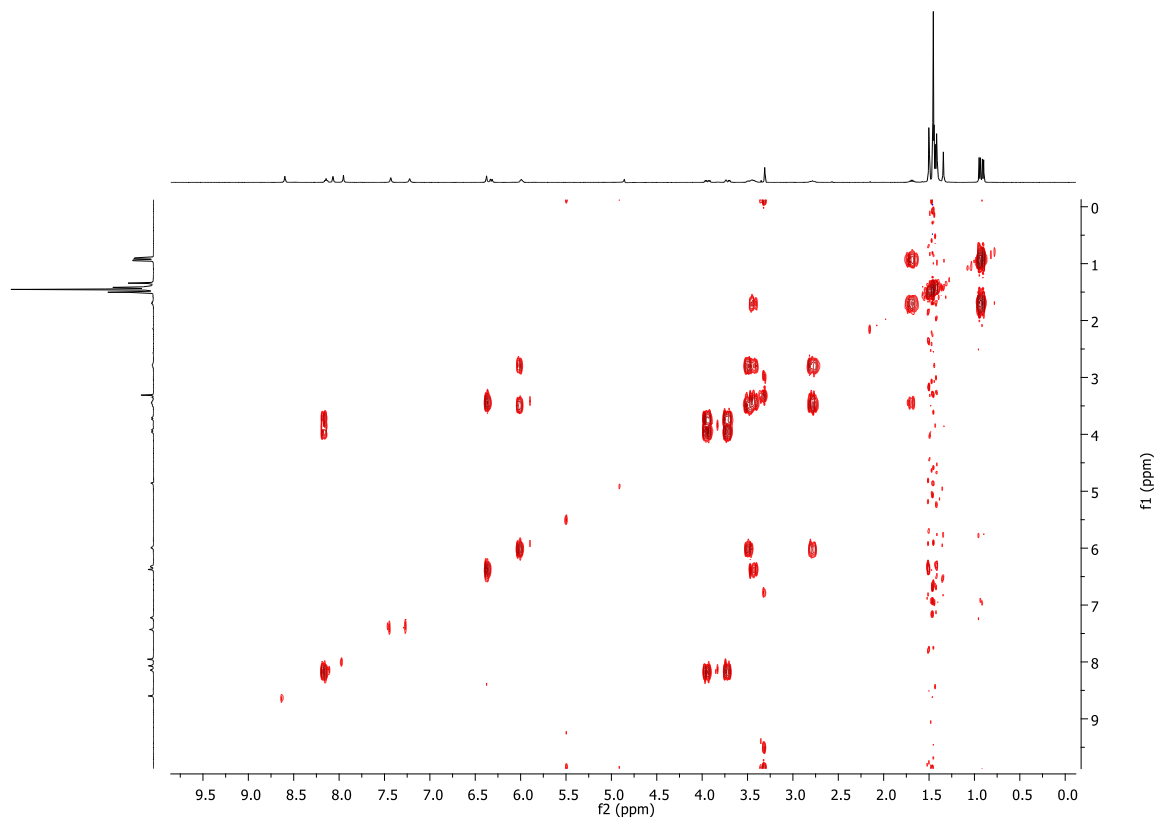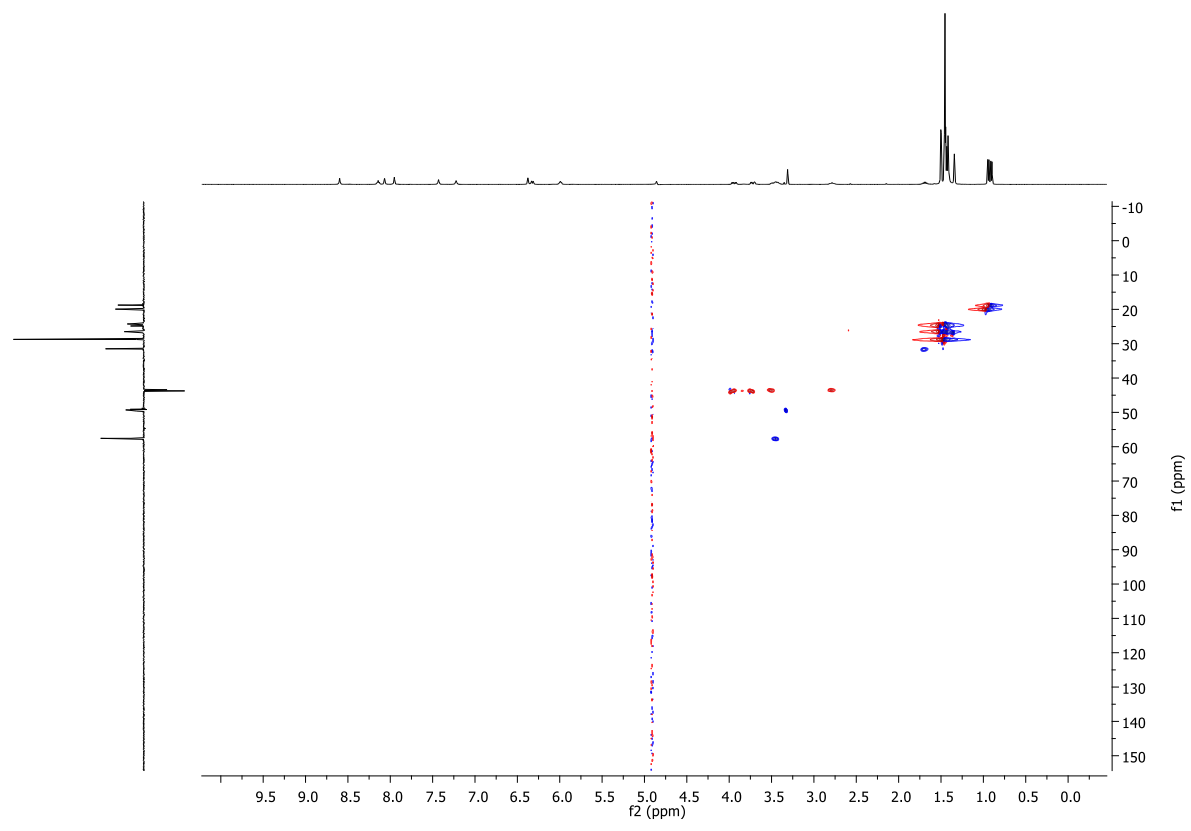

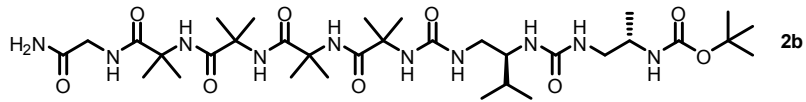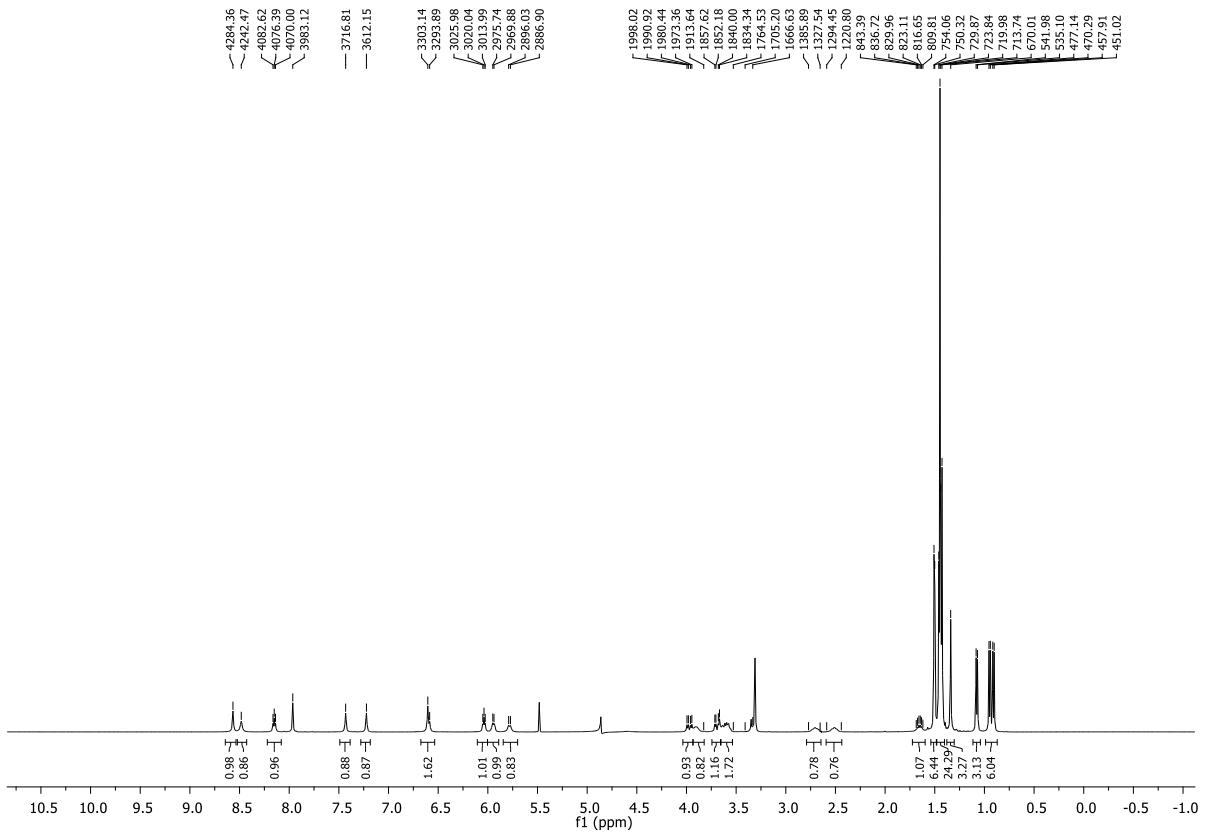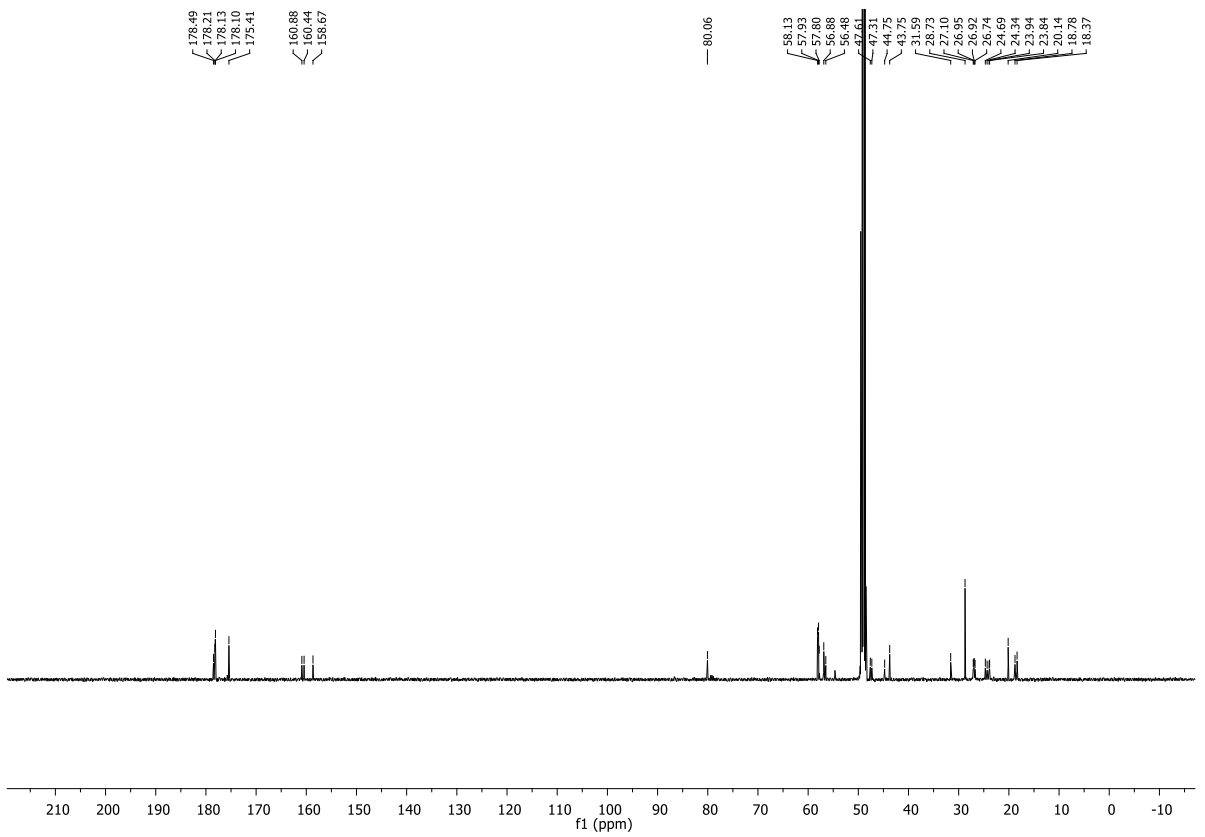

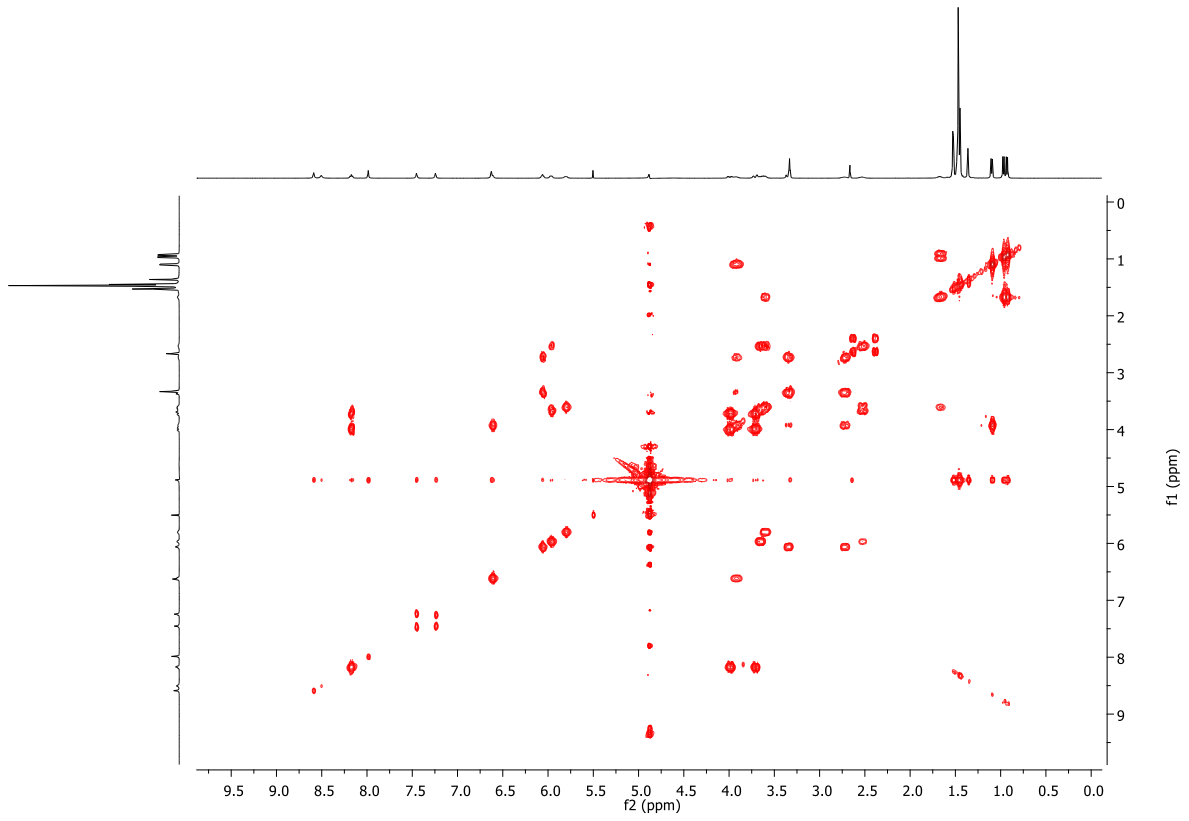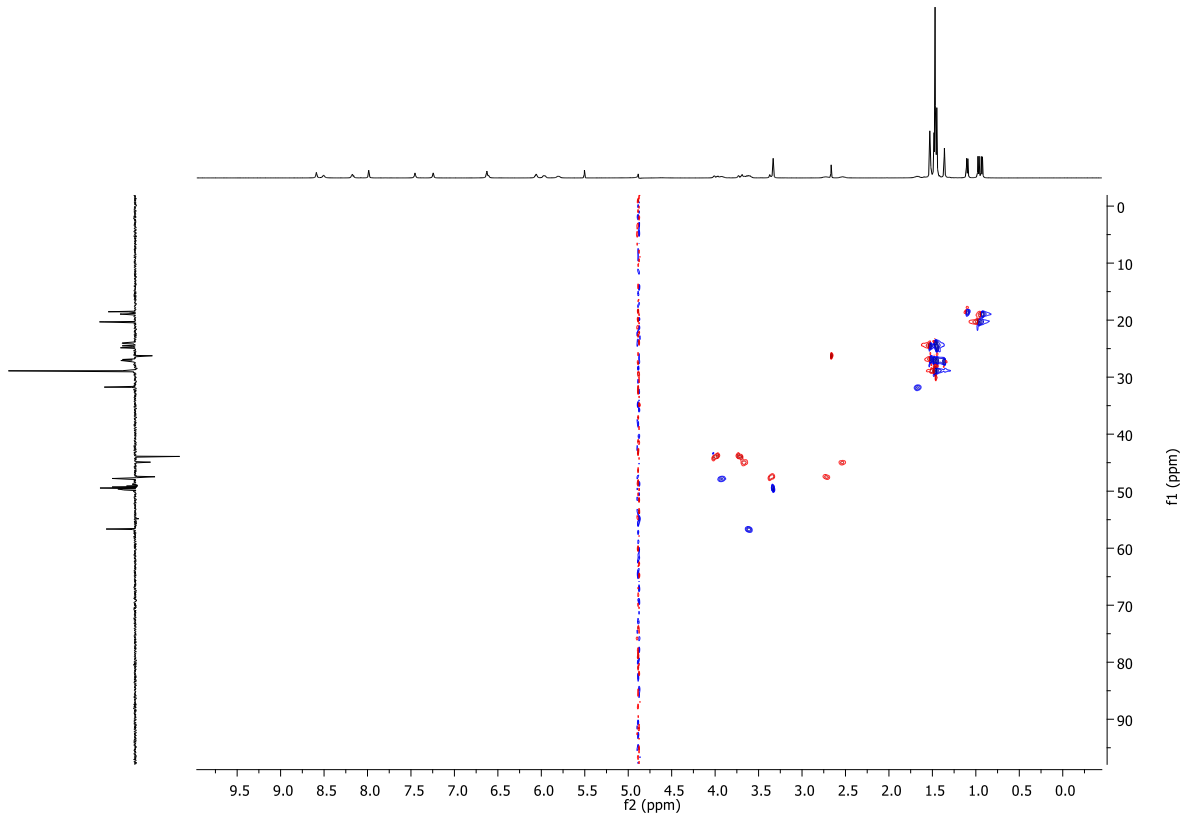

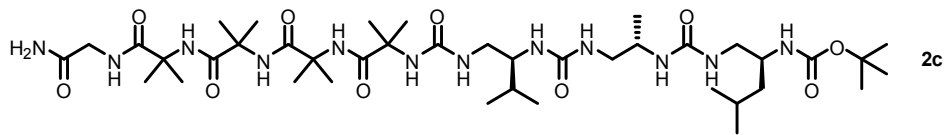

Chemical shift values (ppm) for the <sup>1</sup>H NMR spectrum:

- 4.95.48, 4.24.89, 4.099.57, 4.092.92, 3.980.76
- 3.728.84, 3.624.21
- 3.450.18, 3.316.29, 3.306.29, 3.286.25, 3.226.79
- 3.052.10, 2.959.85, 2.956.49, 2.950.49, 2.946.99, 2.935.56, 2.925.67, 2.898.30, 2.887.89
- 2.021.58, 2.032.24, 1.947.75, 1.995.70, 1.988.55, 1.893.16, 1.871.66, 1.745.02, 1.741.48, 1.737.77, 1.733.89, 1.730.97, 1.727.23, 1.723.61, 1.728.00, 1.728.00, 1.215.93, 1.205.54, 1.134.93
- 890.70, 766.67, 763.14, 744.75, 740.51, 734.63, 731.96, 679.24, 658.15, 577.24, 544.98, 480.67, 476.07, 423.96, 463.32, 456.71, 449.93

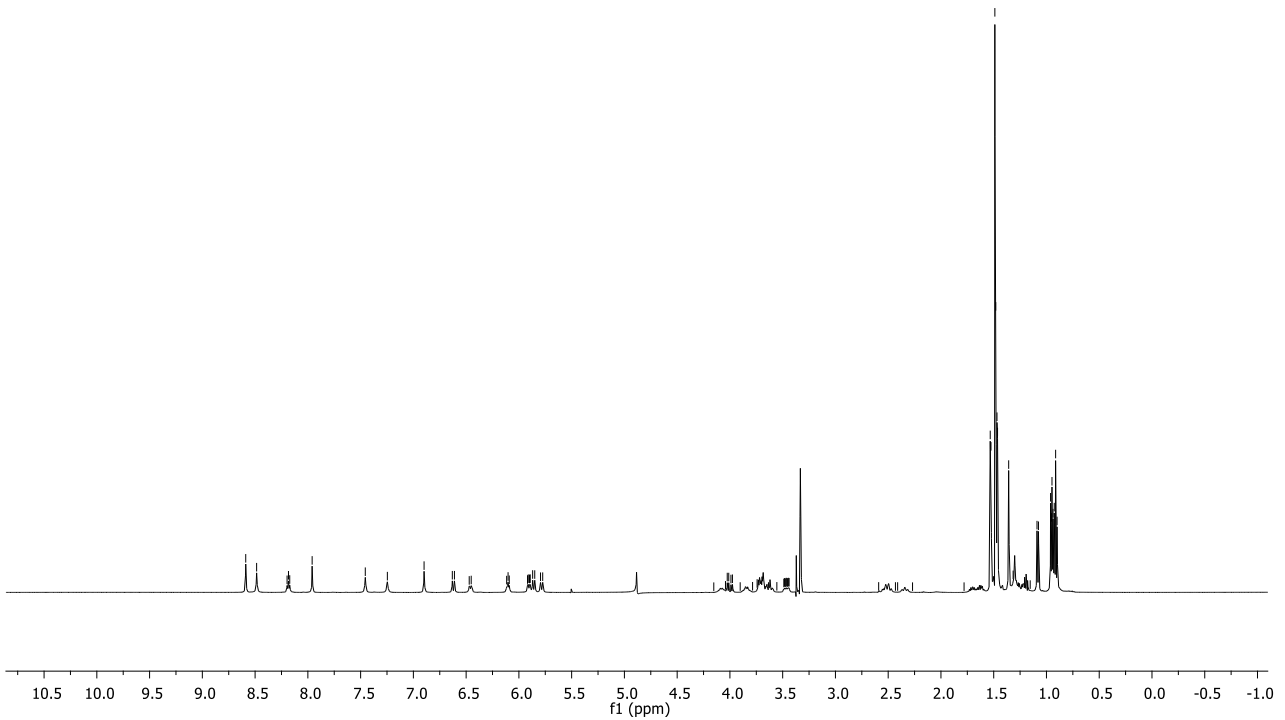

Chemical shift values (ppm) for the <sup>13</sup>C NMR spectrum:

- 178.65, 178.36, 178.17, 178.14, 175.46
- 161.37, 160.89, 160.73, 158.18

Chemical shift values (ppm) for the <sup>13</sup>C NMR spectrum:

- 80.03
- 58.14, 57.91, 57.87, 56.85, 55.75, 55.35
- 46.62, 43.75, 43.49, 43.24, 38.81, 27.37, 27.14, 27.03, 26.79, 26.23, 24.51, 24.26, 23.81, 23.73, 23.48, 22.60, 20.02, 18.61, 18.35, 18.05, 13.37

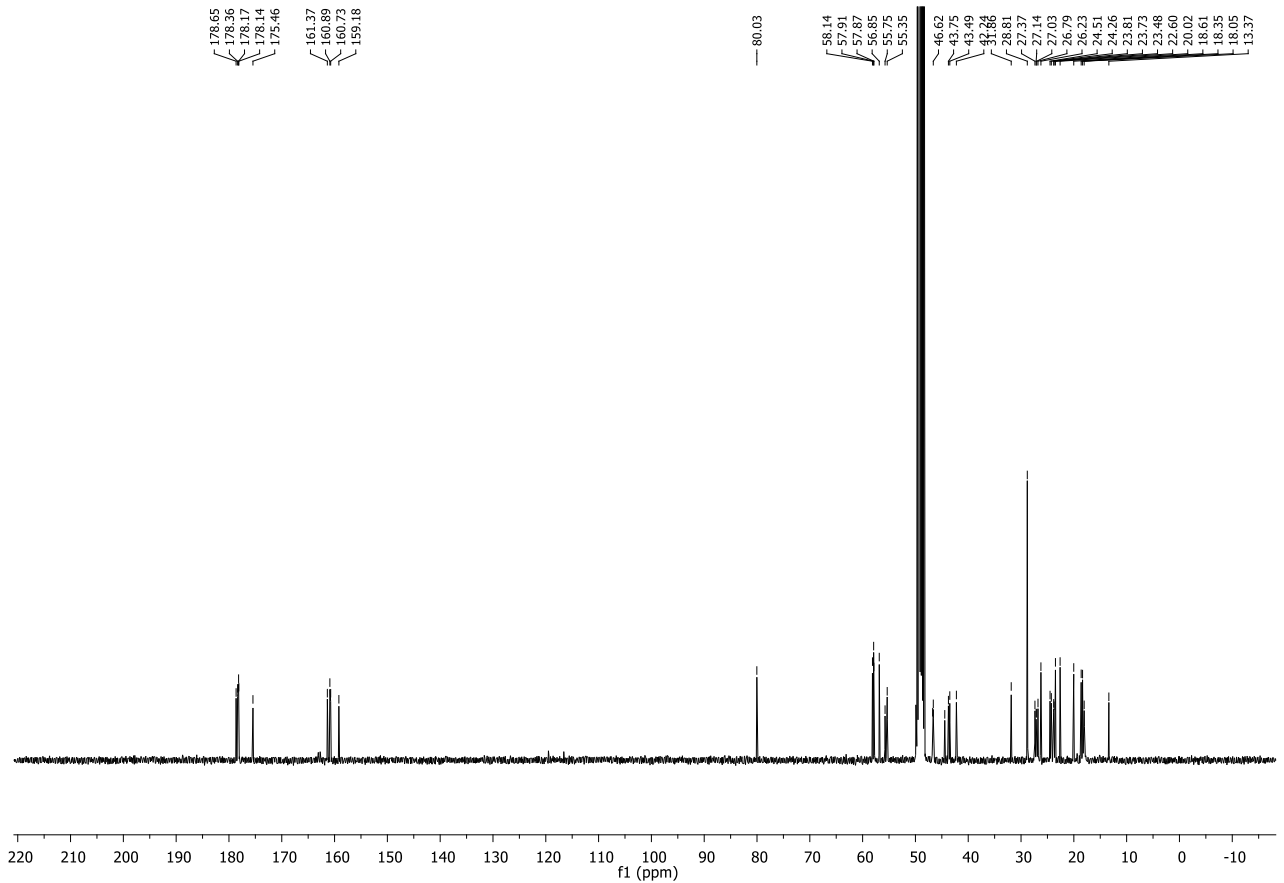

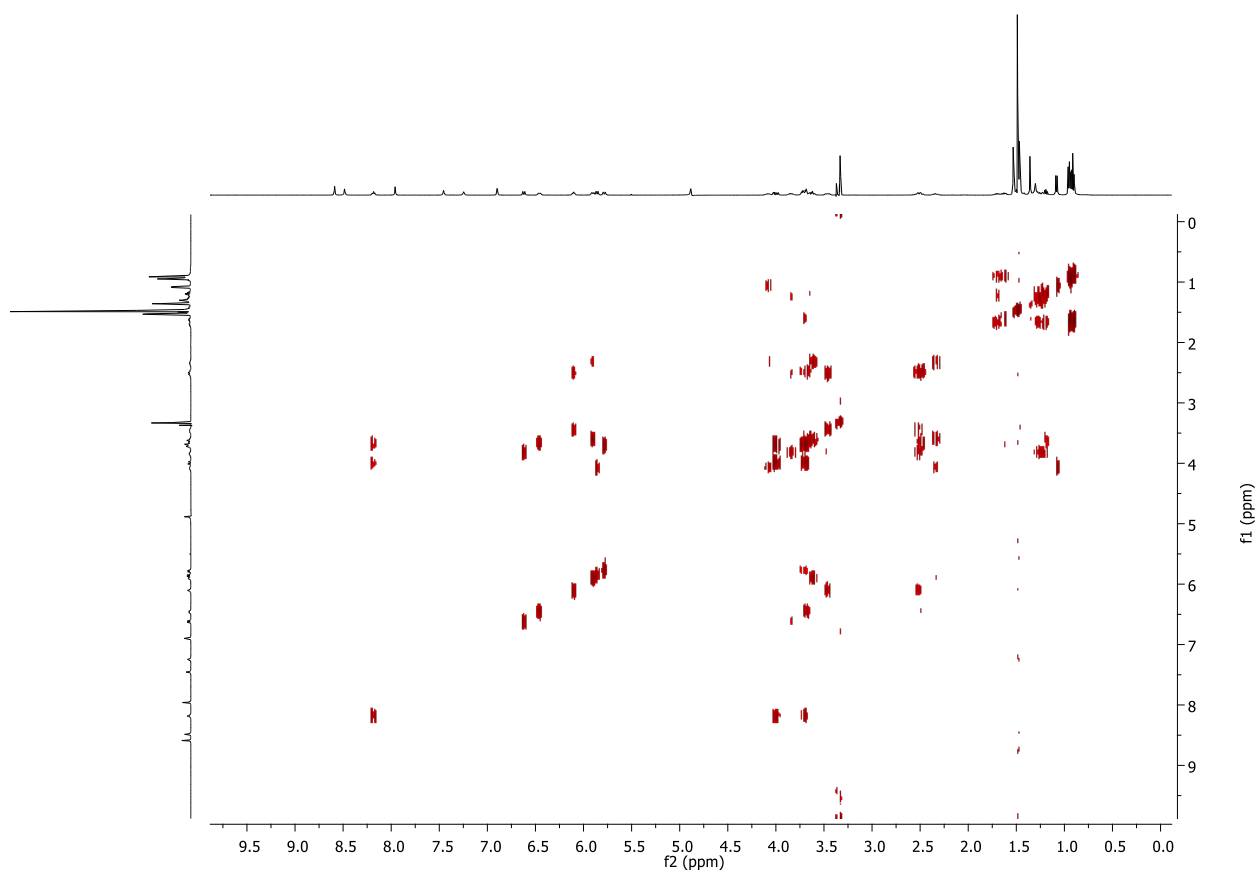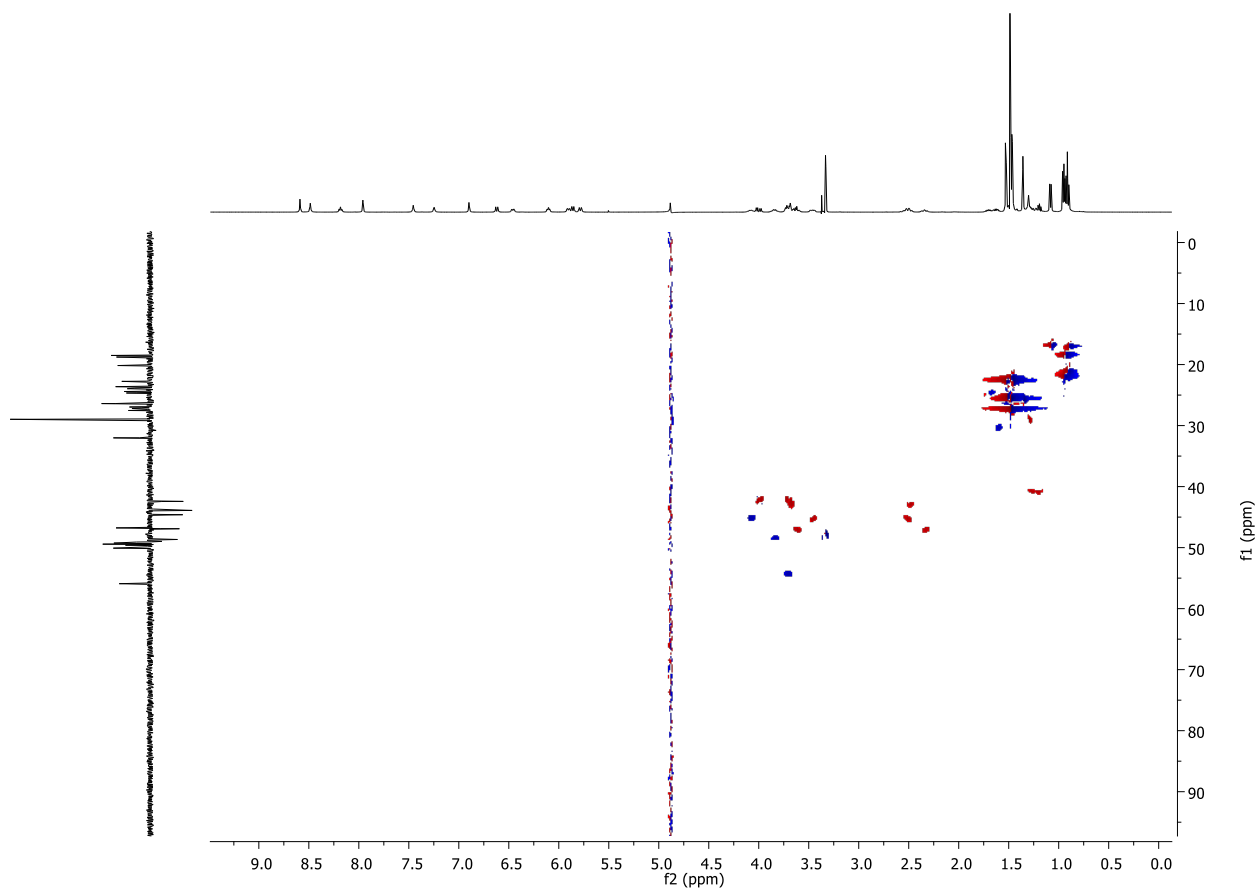

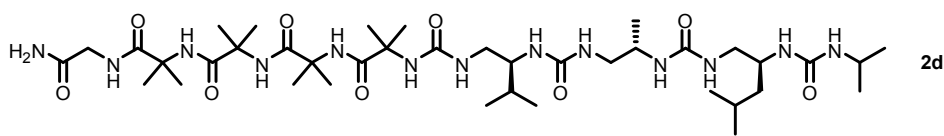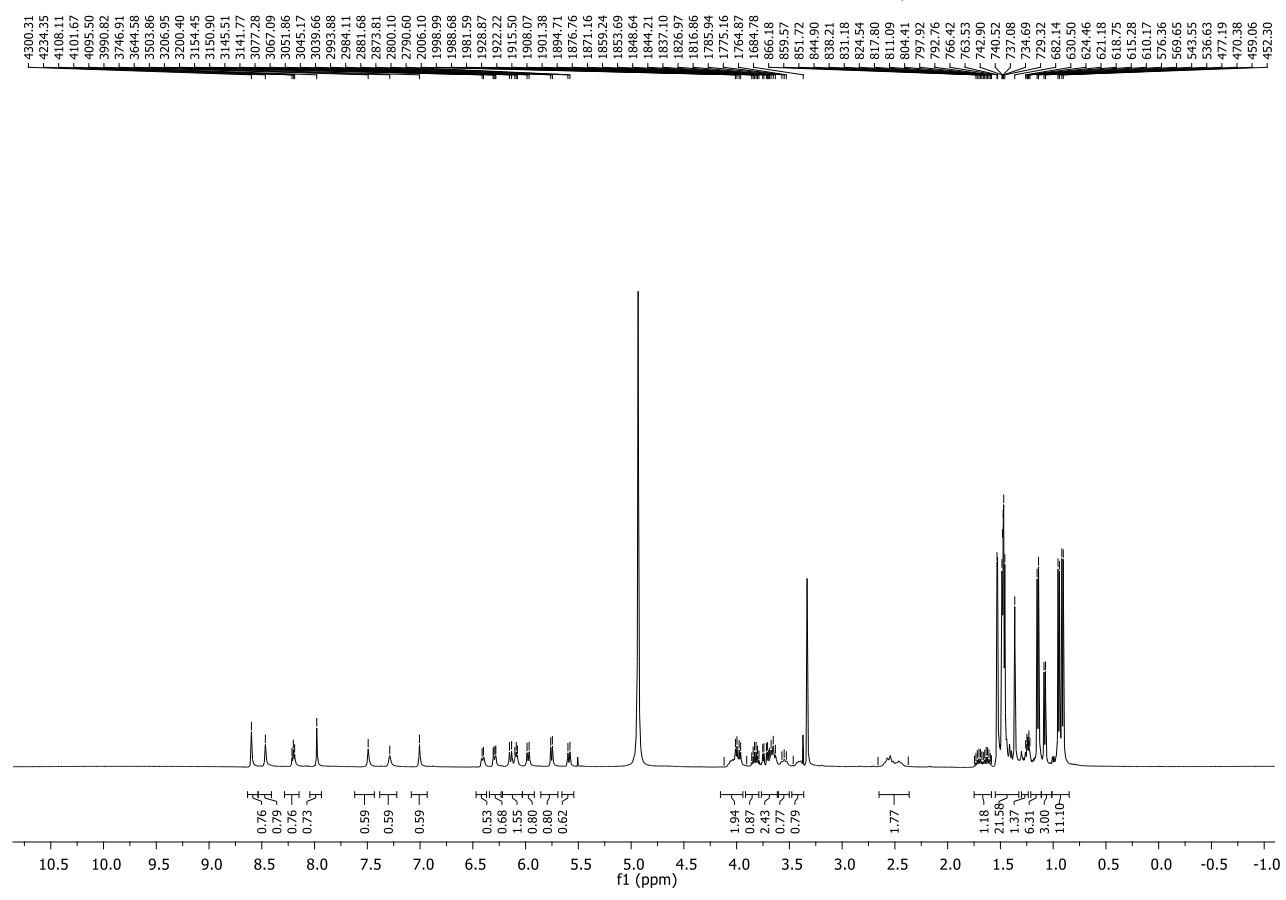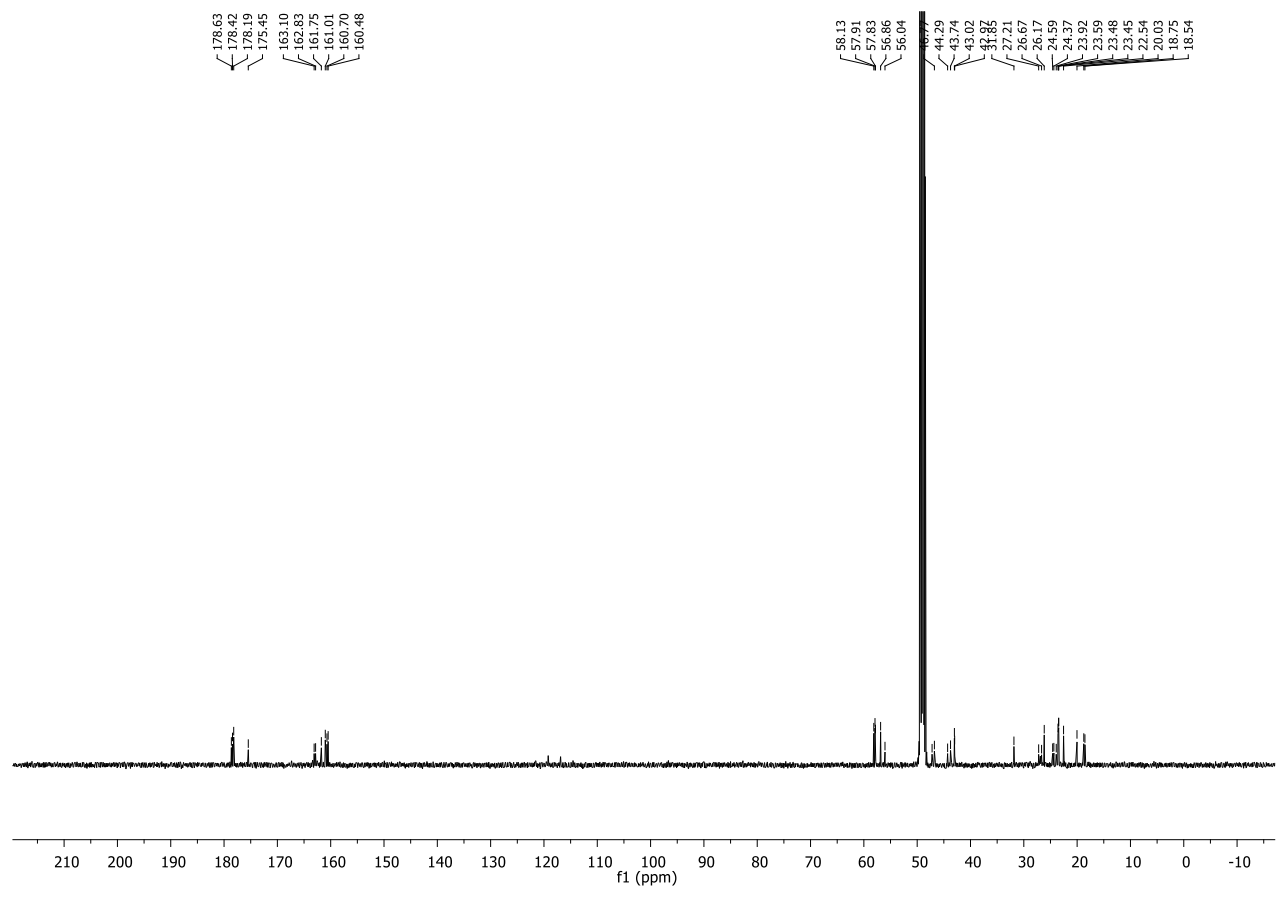

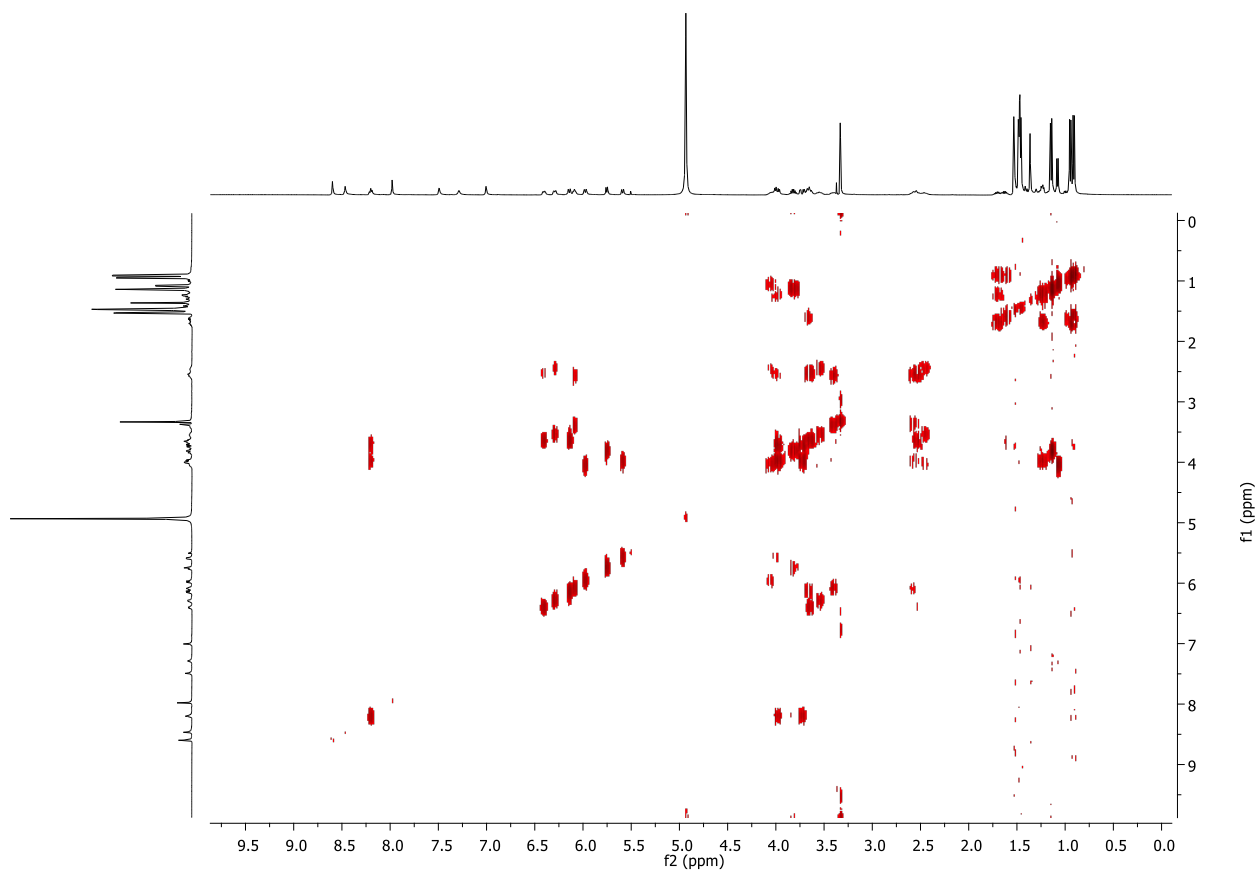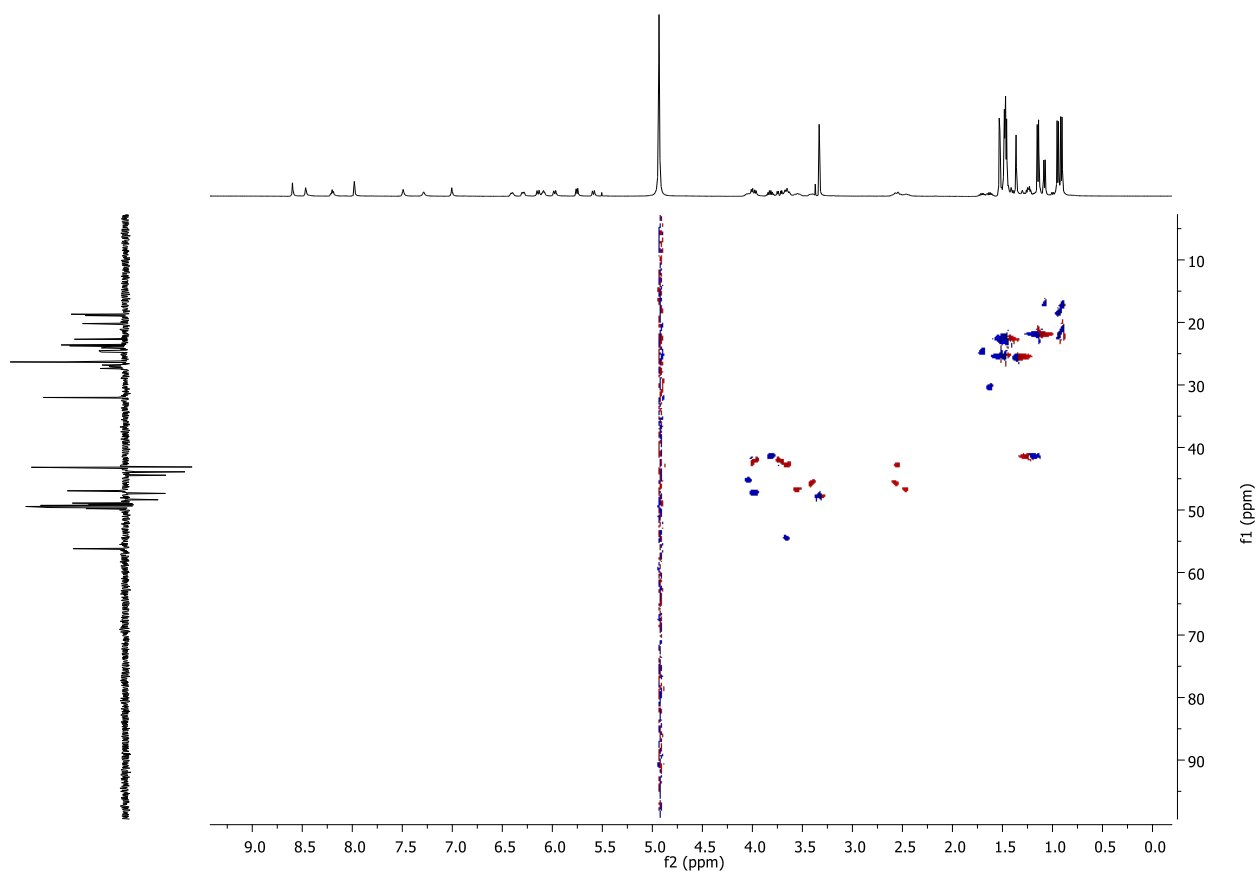

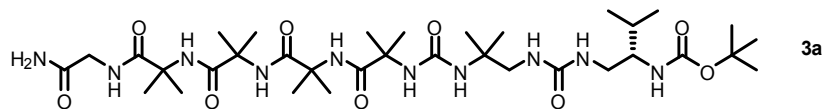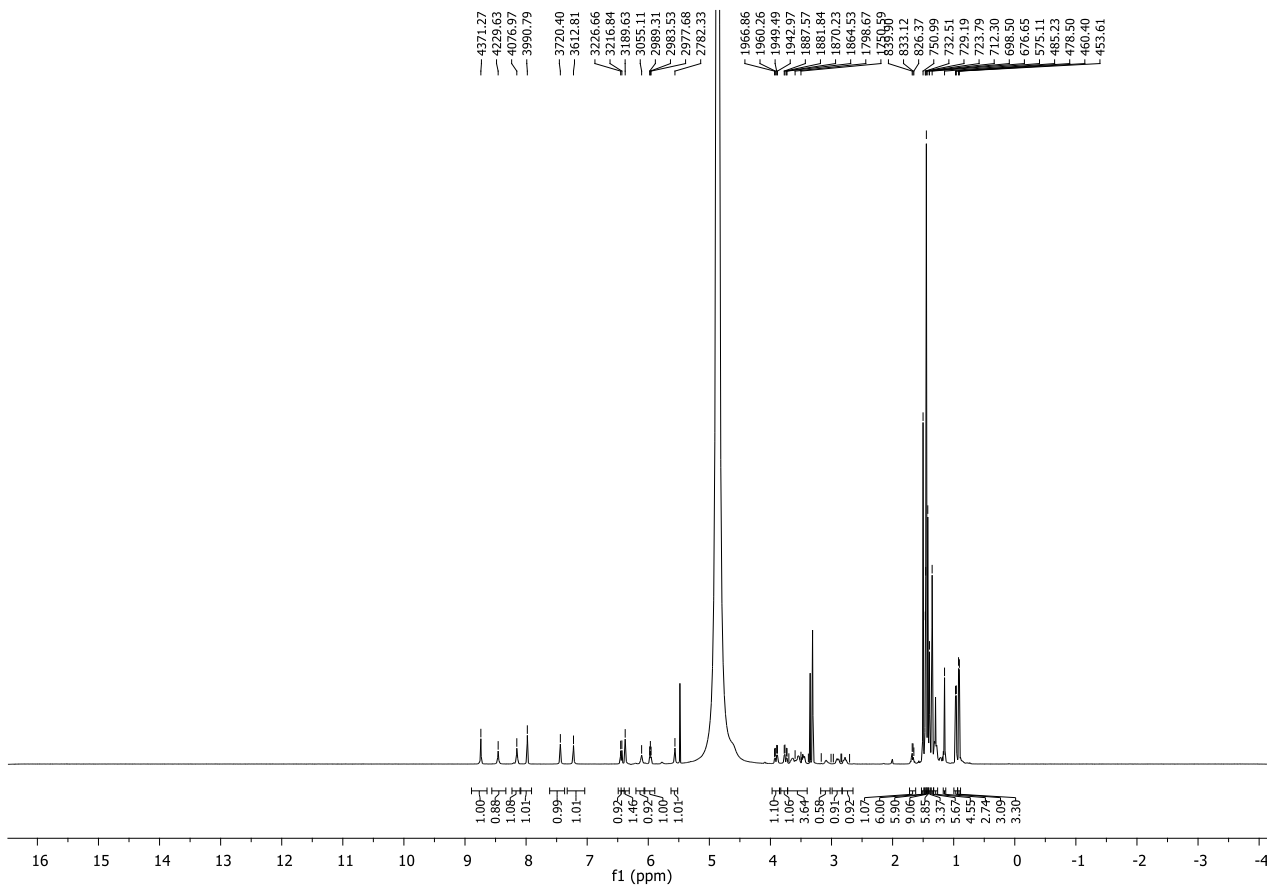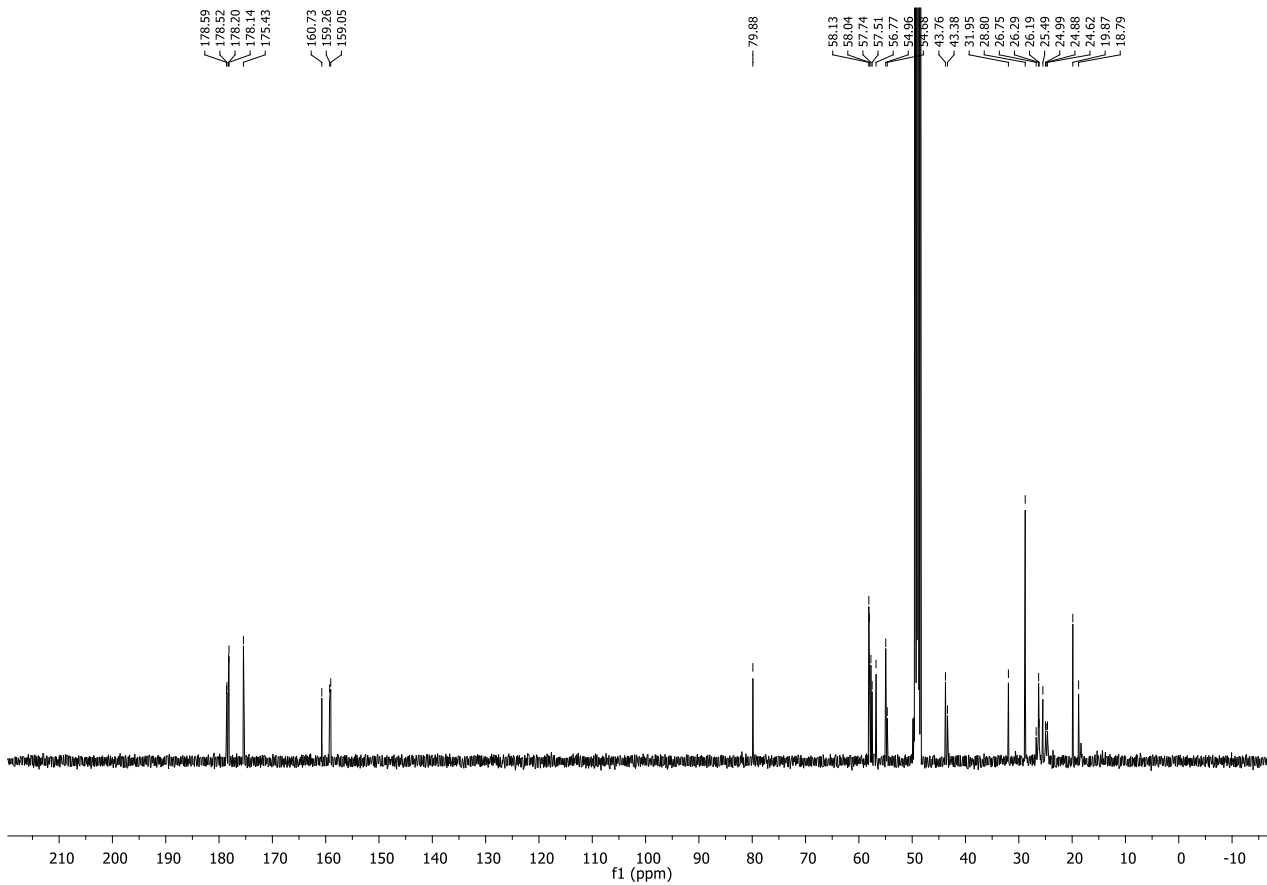



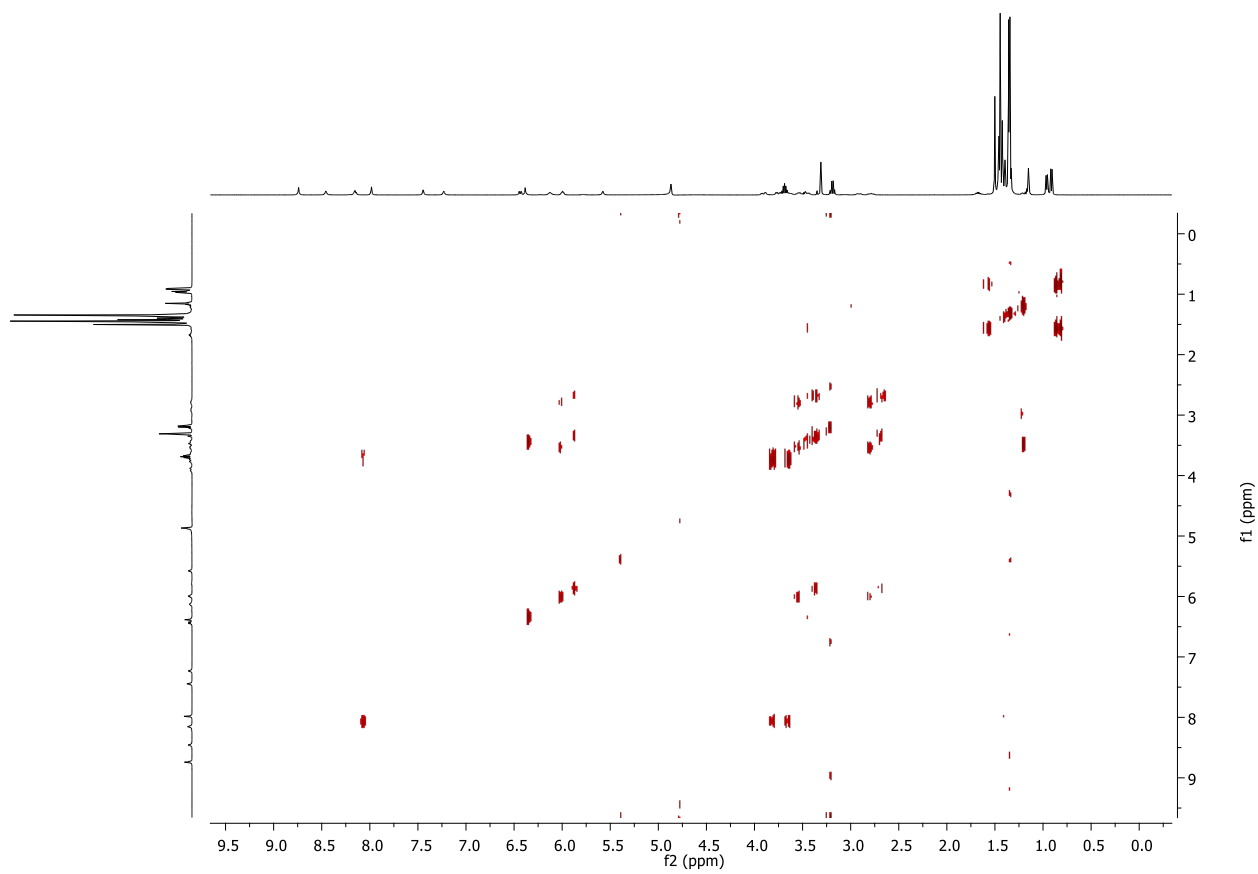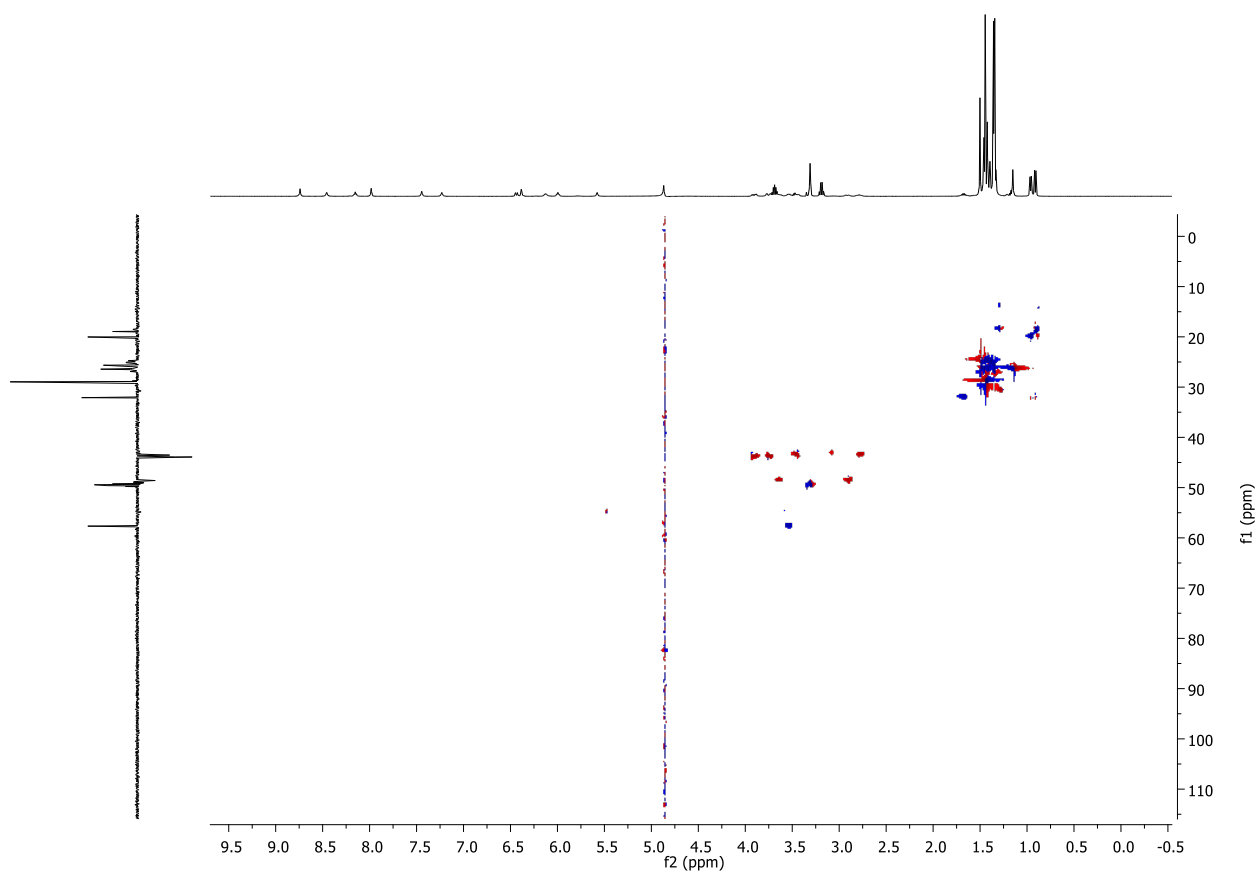

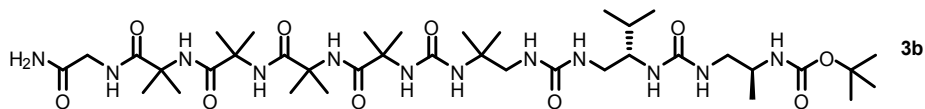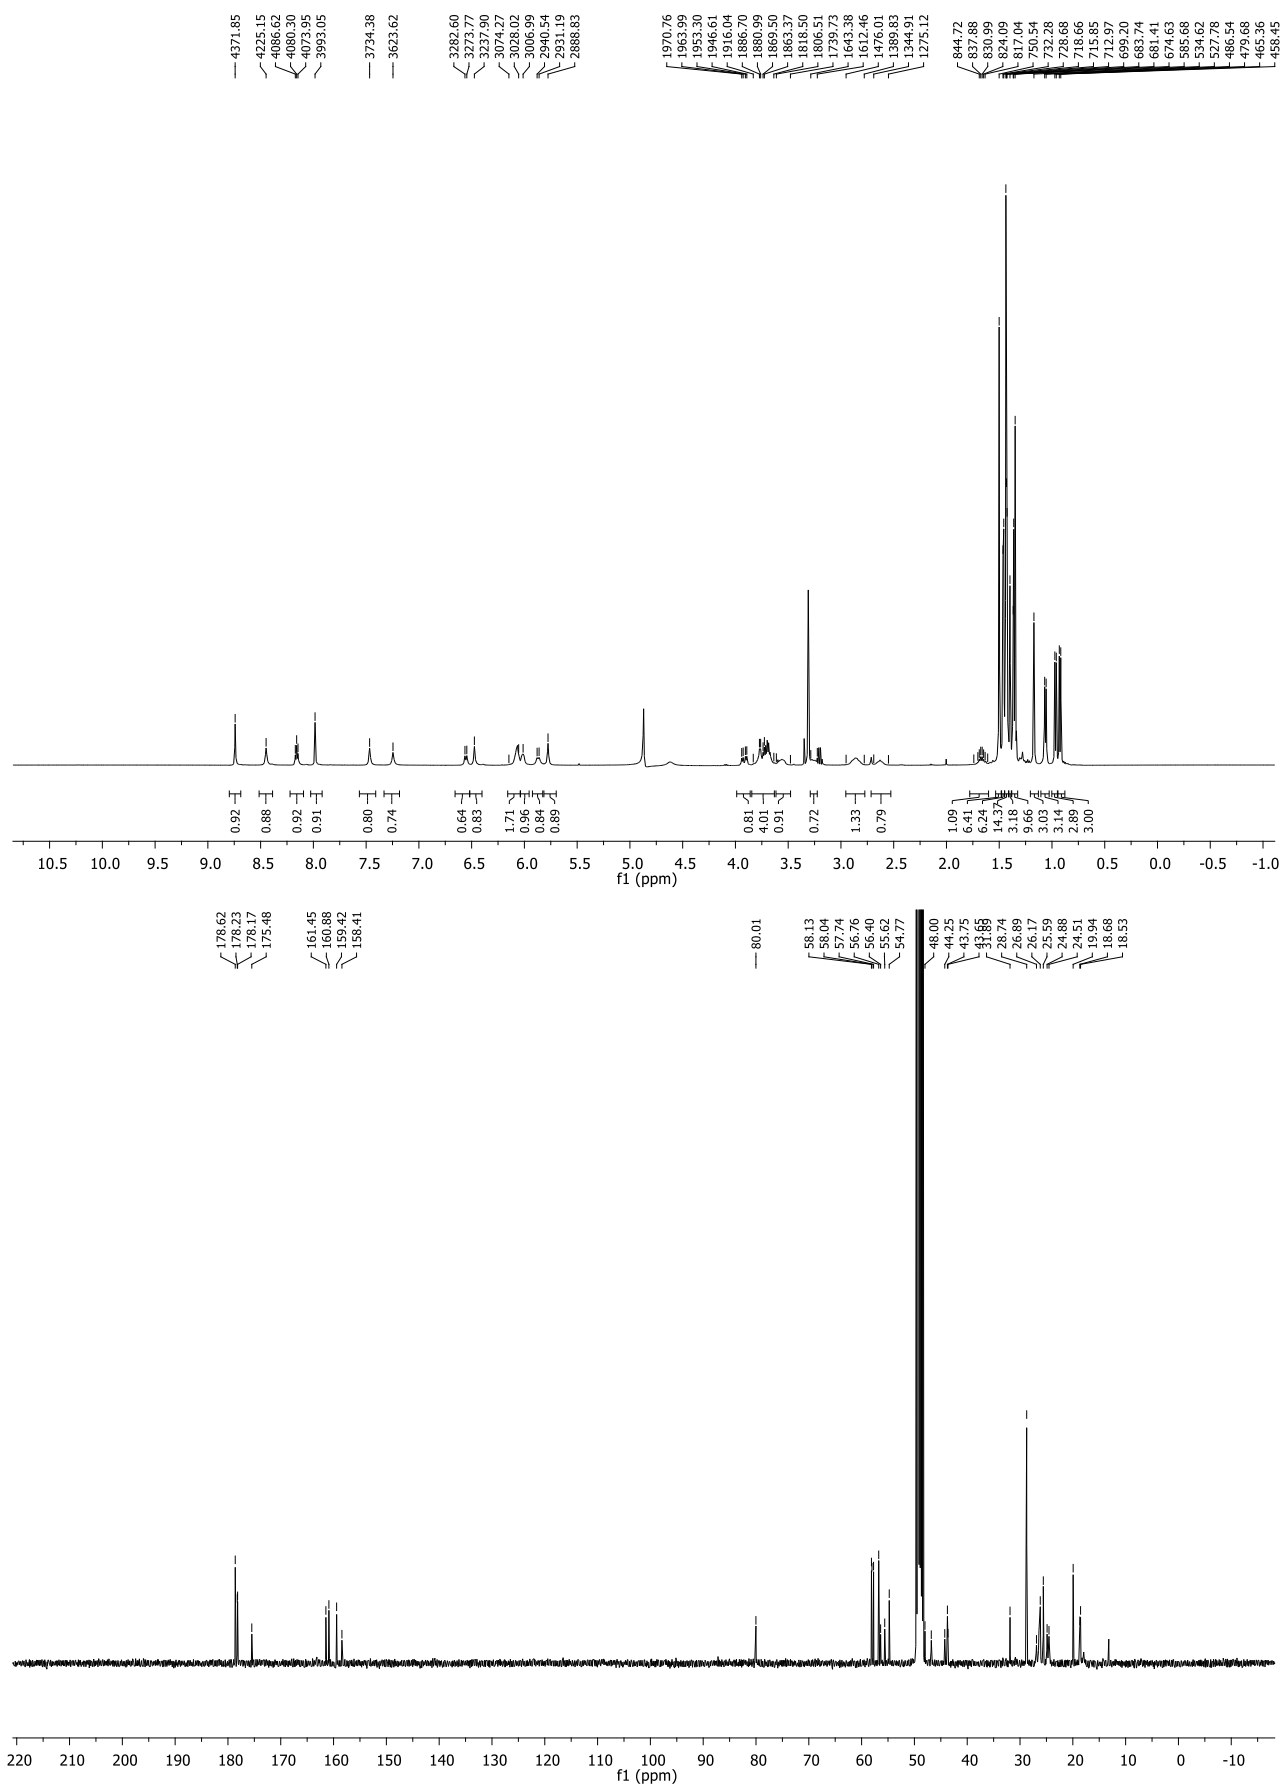

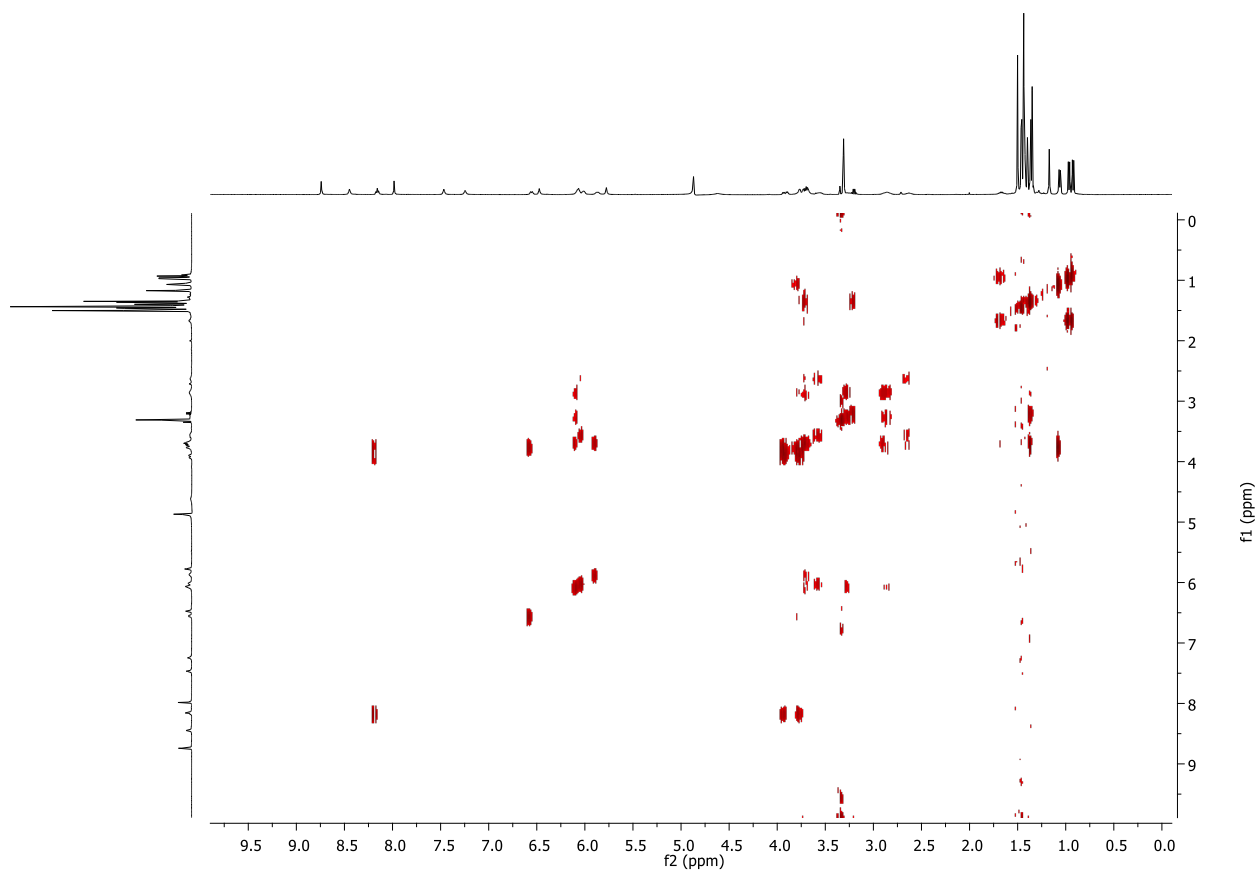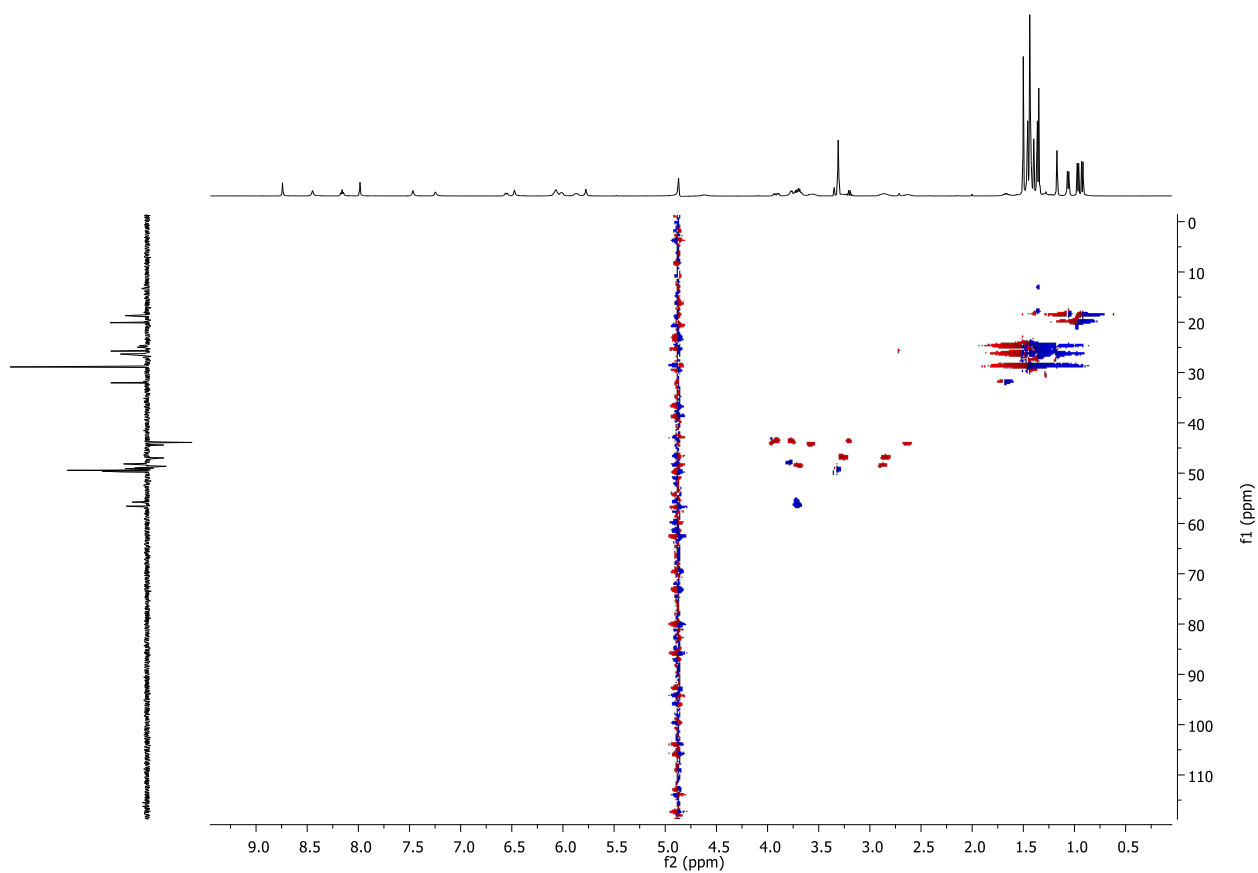

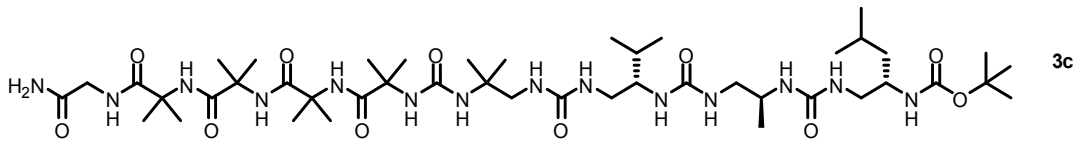

4386.83  
4216.24  
4094.92  
4088.54  
4082.25  
4074.95  
3931.74  
3621.74  
3311.14  
3301.14  
3269.41  
3225.54  
3216.81  
3189.16  
3185.29  
3180.48  
3176.47  
3043.38  
3036.94  
3031.21  
2967.55  
2957.19  
2914.12  
2904.37  
2874.96  
2871.5  
1929.66  
1885.71  
1975.14  
1968.24  
1958.22  
1912.28  
1904.98  
1884.08  
1878.22  
1866.62  
1860.72  
1825.36  
1771.80  
1724.68  
1721.13  
1717.59  
1713.78  
1710.65  
1706.87  
1703.35  
1699.90  
1696.90  
1451.68  
1440.60  
1437.56  
1301.38  
1289.79  
1276.52  
1261.14  
1256.21  
1245.90  
1236.06  
1231.11  
1188.64  
1176.37  
1163.45  
793.97  
760.74  
743.24  
741.23  
727.32  
725.93  
713.33  
697.48  
678.45  
660.03  
603.41  
547.43  
537.02  
520.10  
485.99  
479.12  
473.02  
465.96  
458.68  
453.27  
446.56

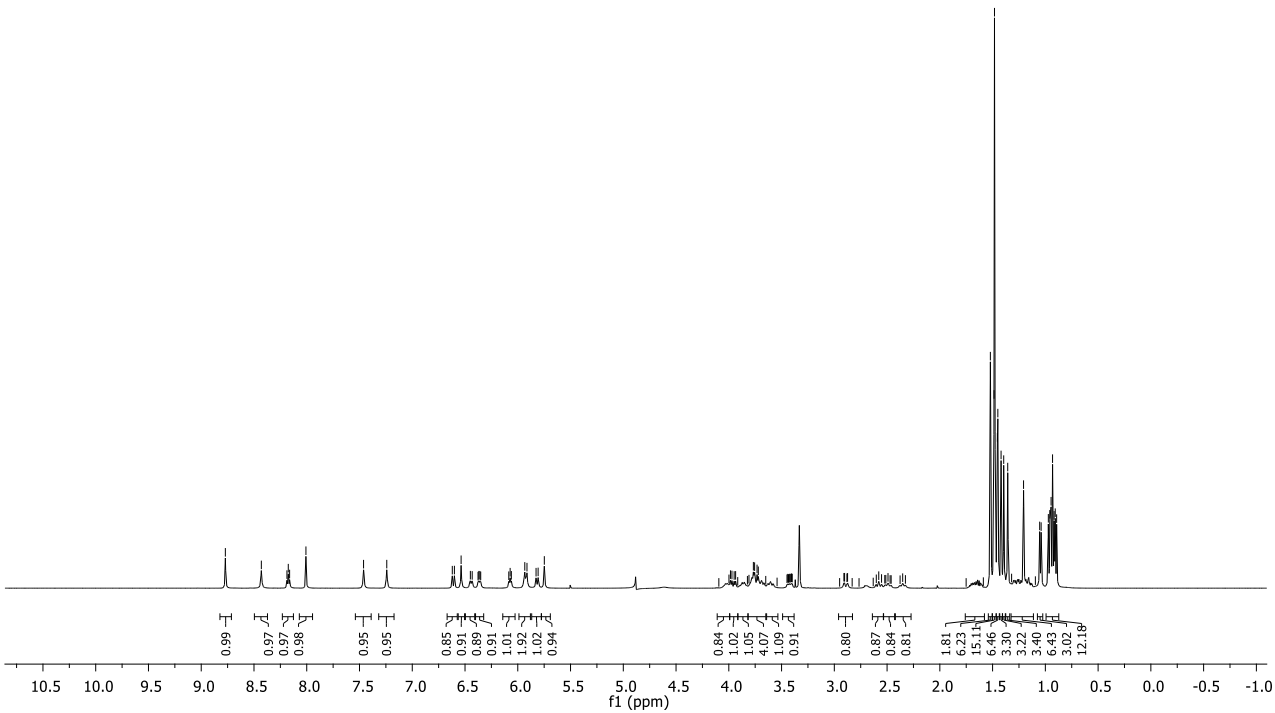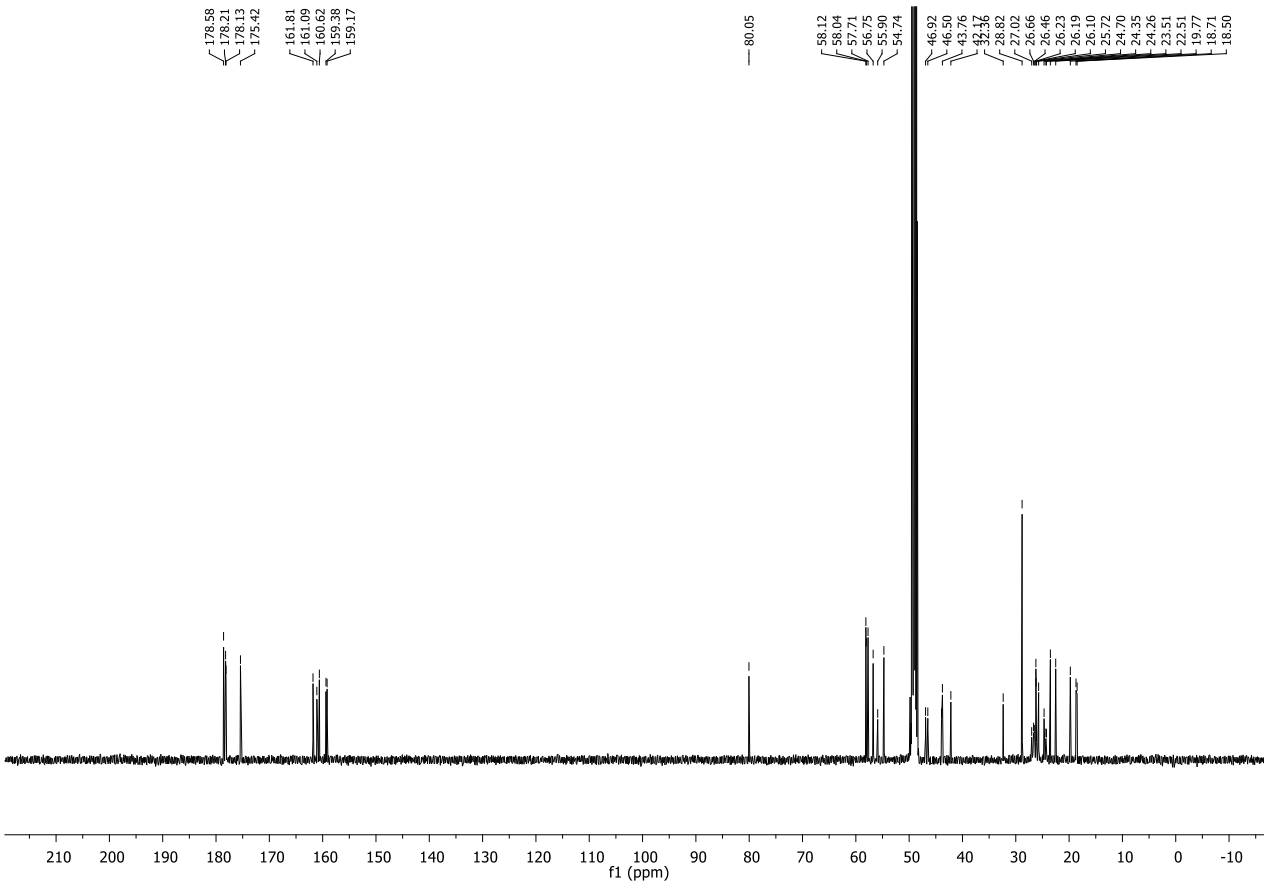

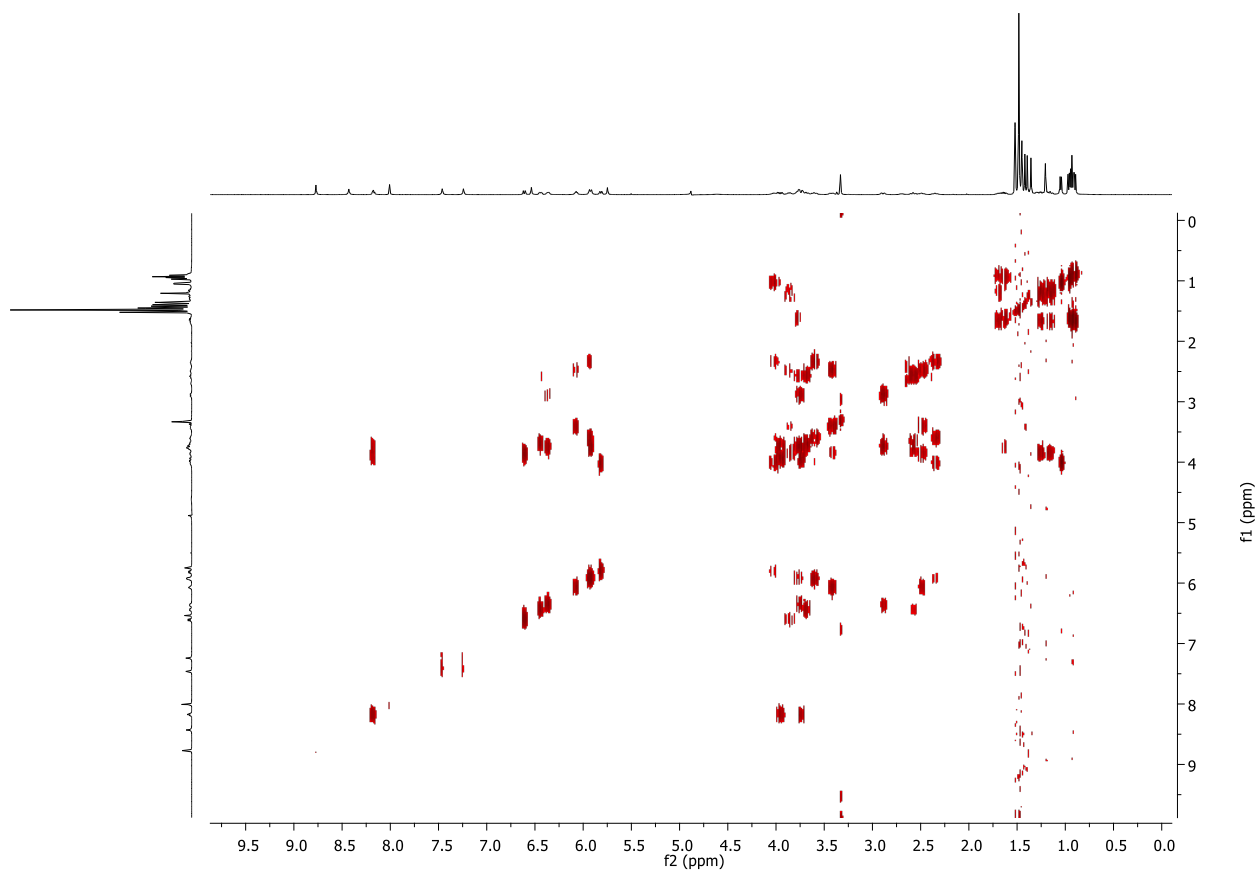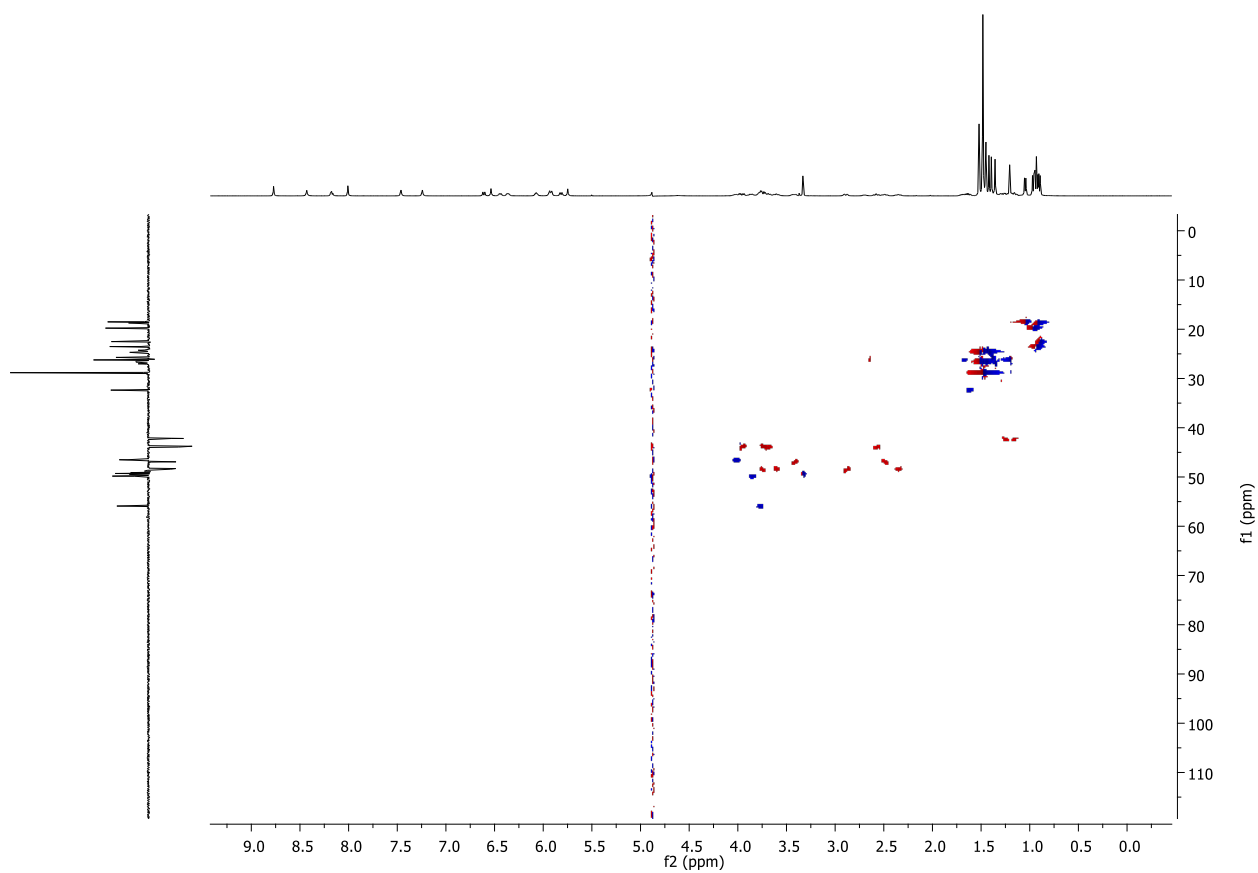

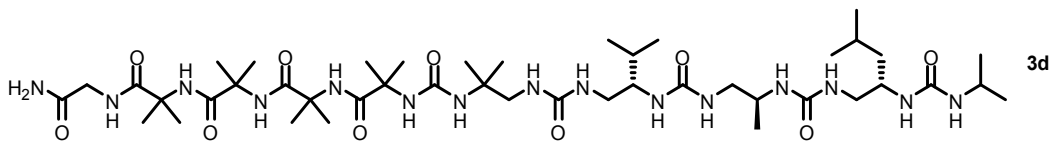

4375.71  
4200.58  
4084.96  
4025.67  
3922.25  
3791.61  
3614.58  
3362.97  
3168.85  
3146.83  
3143.61  
3137.42  
3134.04  
3124.75  
3114.49  
2981.35  
2974.24  
2968.95  
2928.15  
2918.45  
2876.57  
2844.95  
2837.09  
2735.05  
2701.56  
2686.72  
1976.53  
1969.58  
1958.98  
1952.14  
1915.67  
1905.00  
1902.29  
1894.94  
1888.14  
1879.14  
1872.17  
1861.29  
1855.96  
1840.11  
1796.55  
1789.60  
1734.35  
1673.22  
1601.63  
1571.43  
1301.98  
1389.63  
1276.26  
1266.55  
1251.91  
1237.37  
1227.19  
1214.83  
1202.48  
862.19  
783.28  
750.18  
733.02  
728.97  
716.94  
713.79  
699.07  
686.65  
670.43  
659.36  
621.68  
594.58  
570.36  
564.22  
557.60  
515.34  
508.43  
476.30  
469.44  
461.61  
457.14  
454.87  
442.00  
435.32

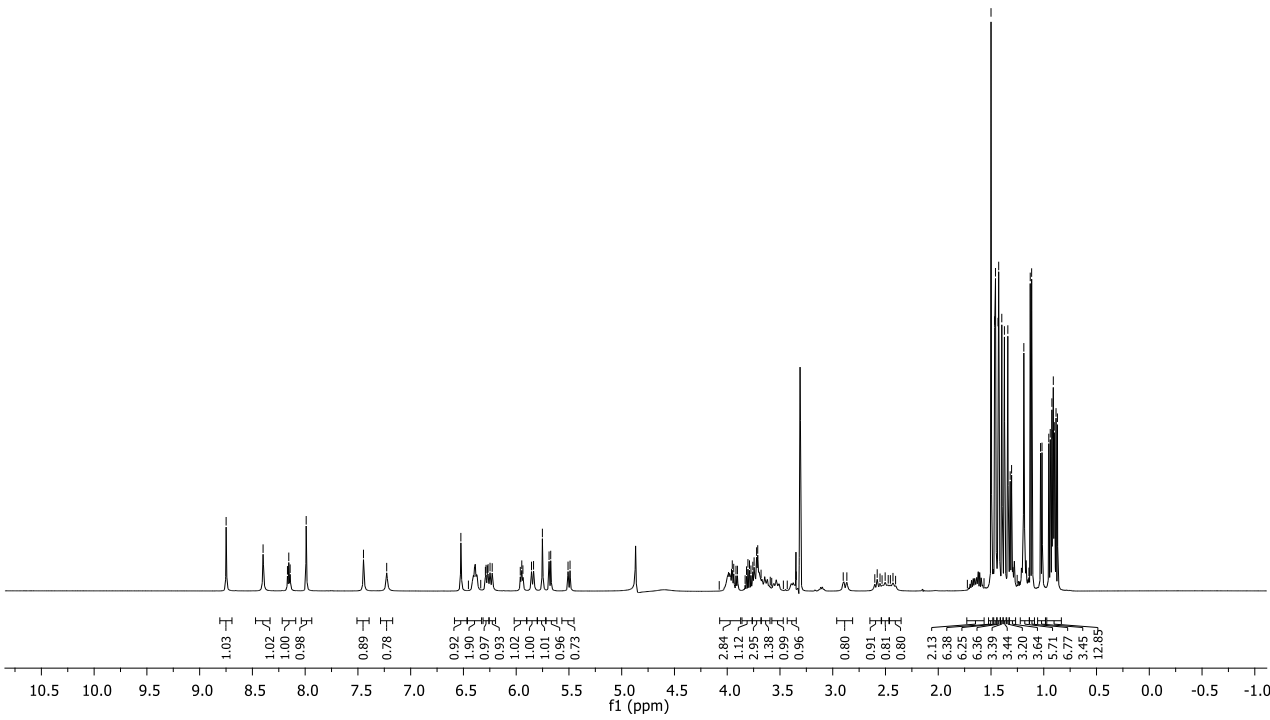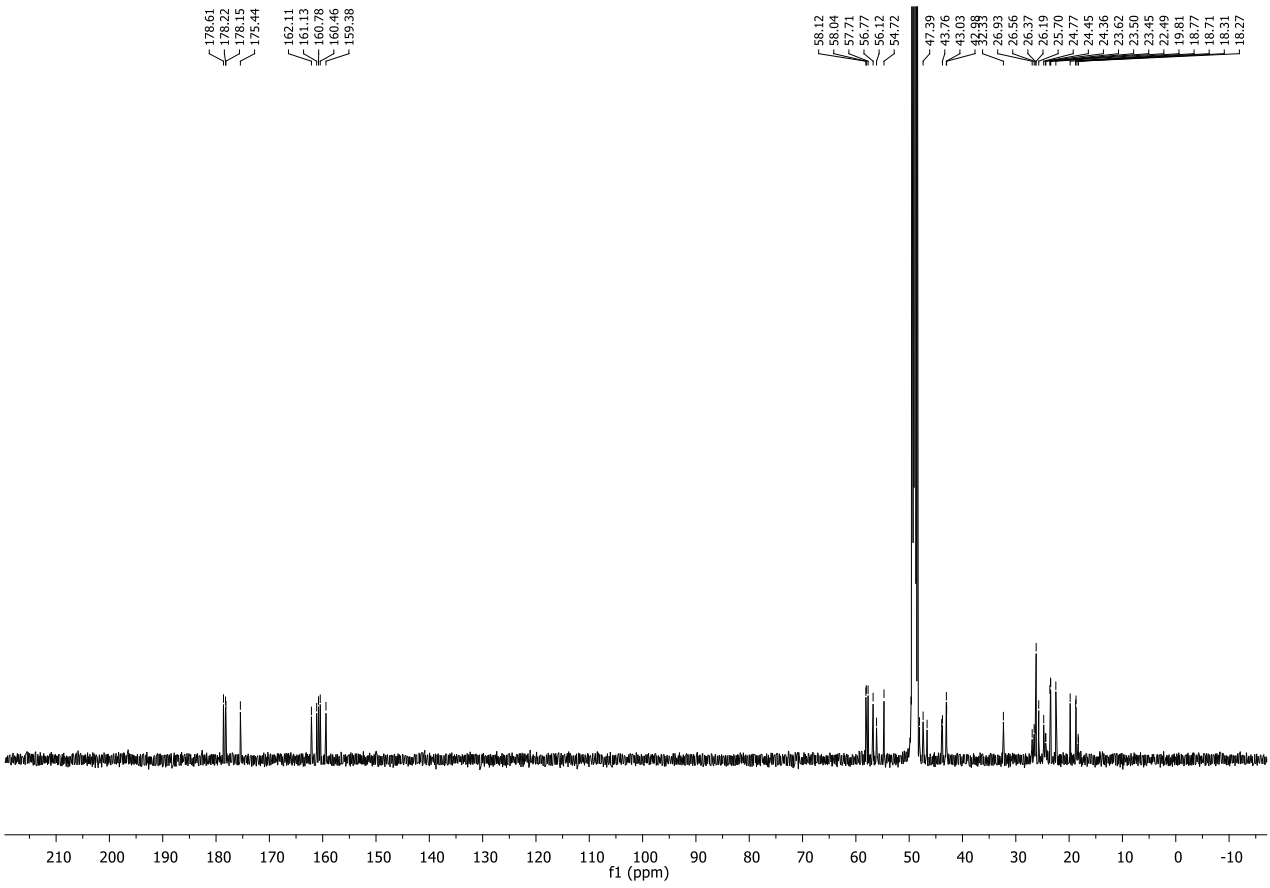

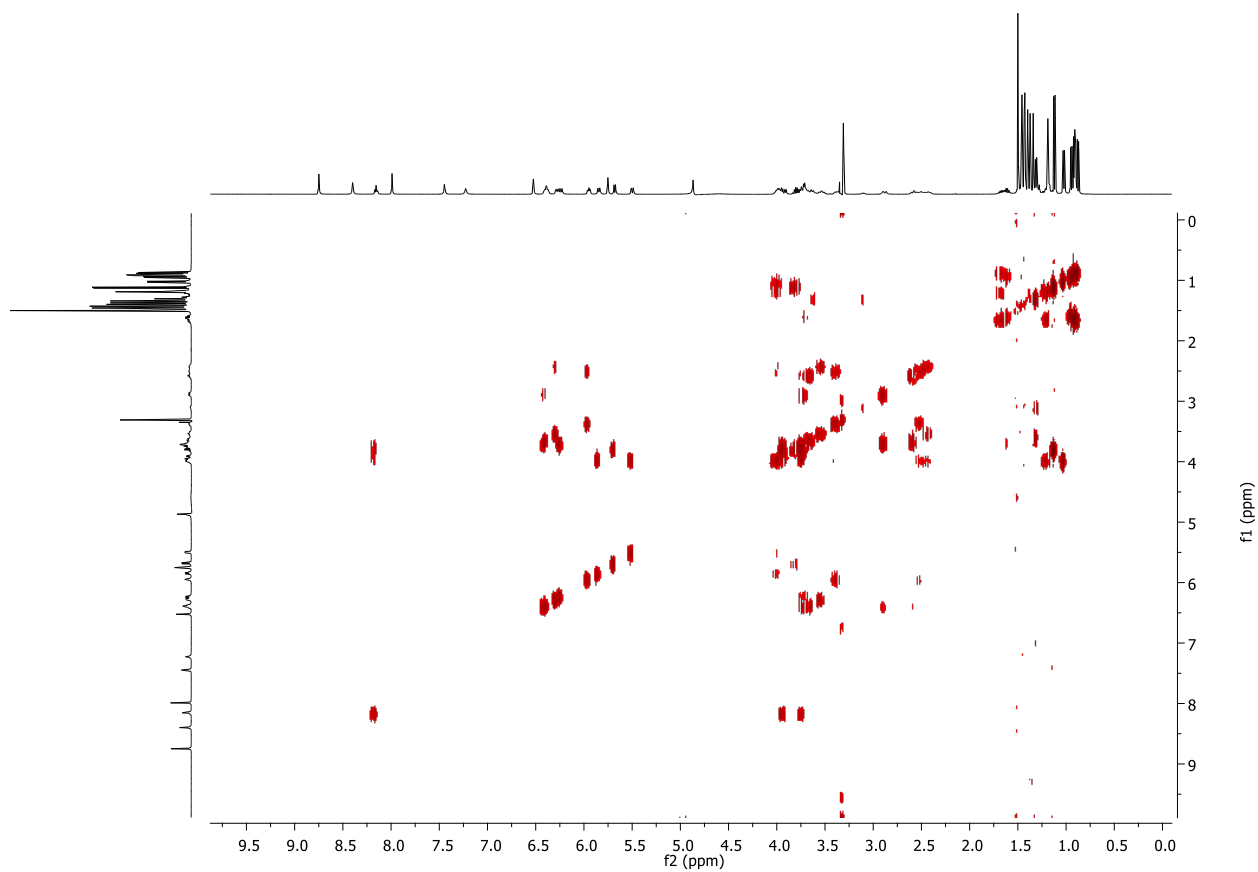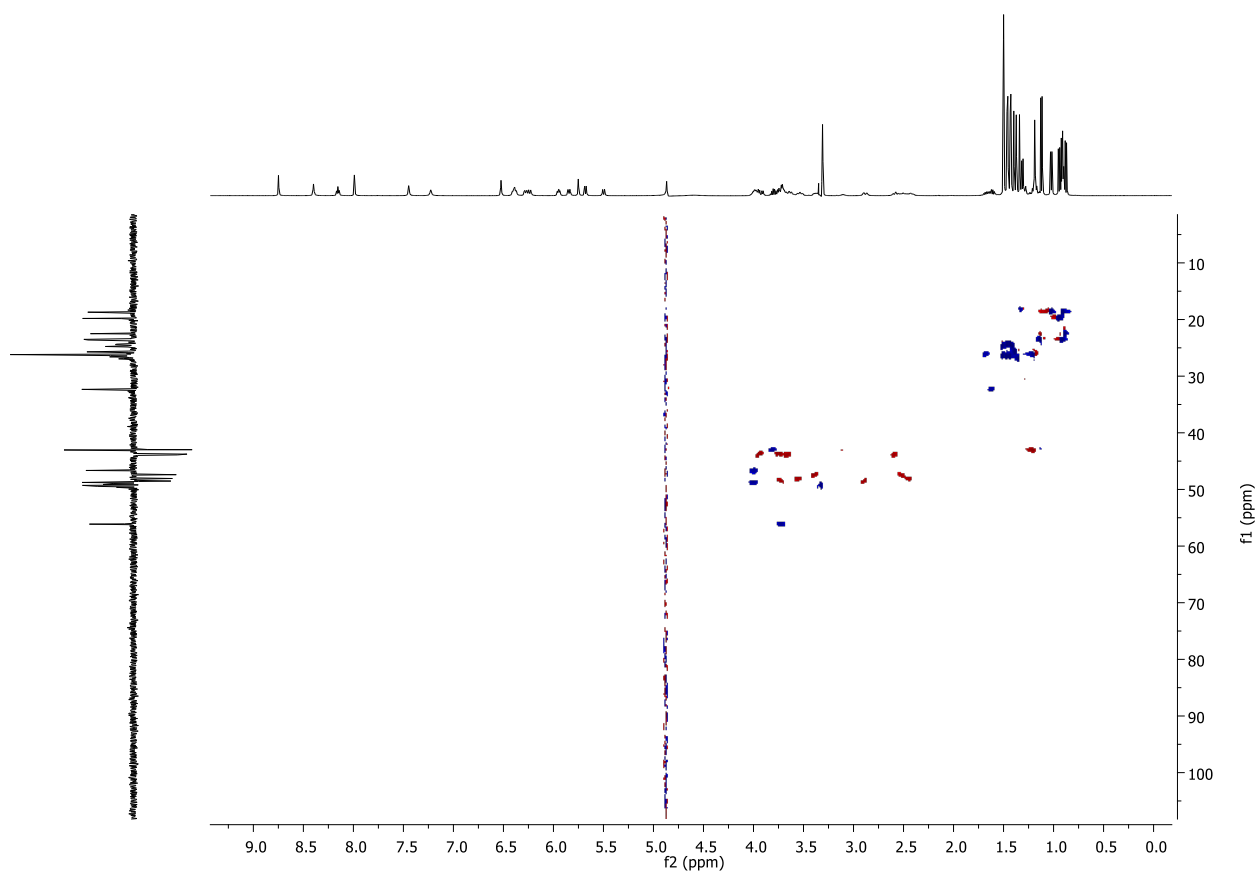

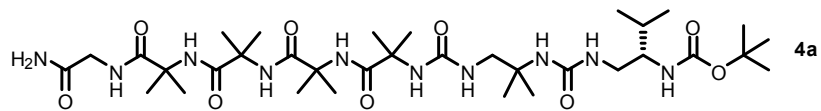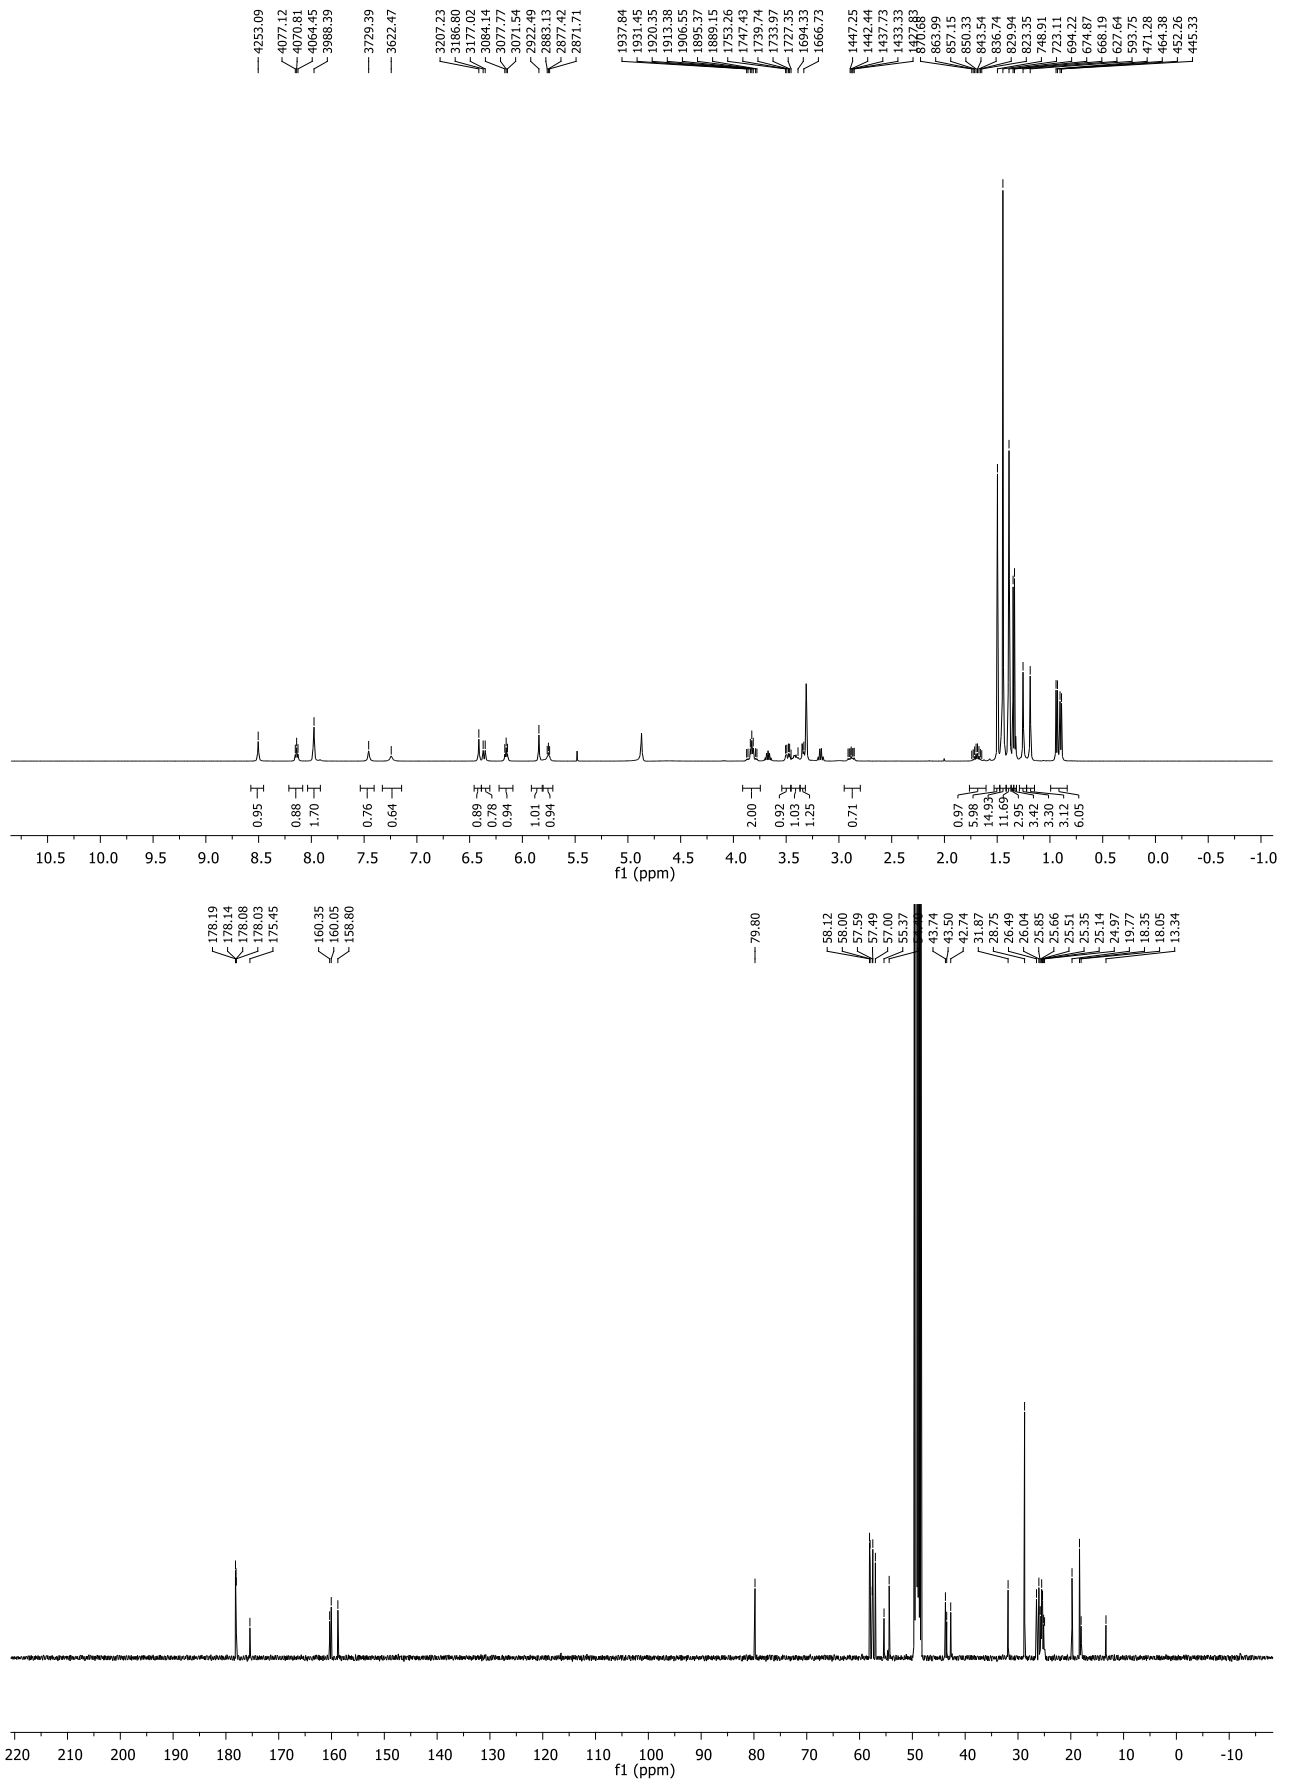



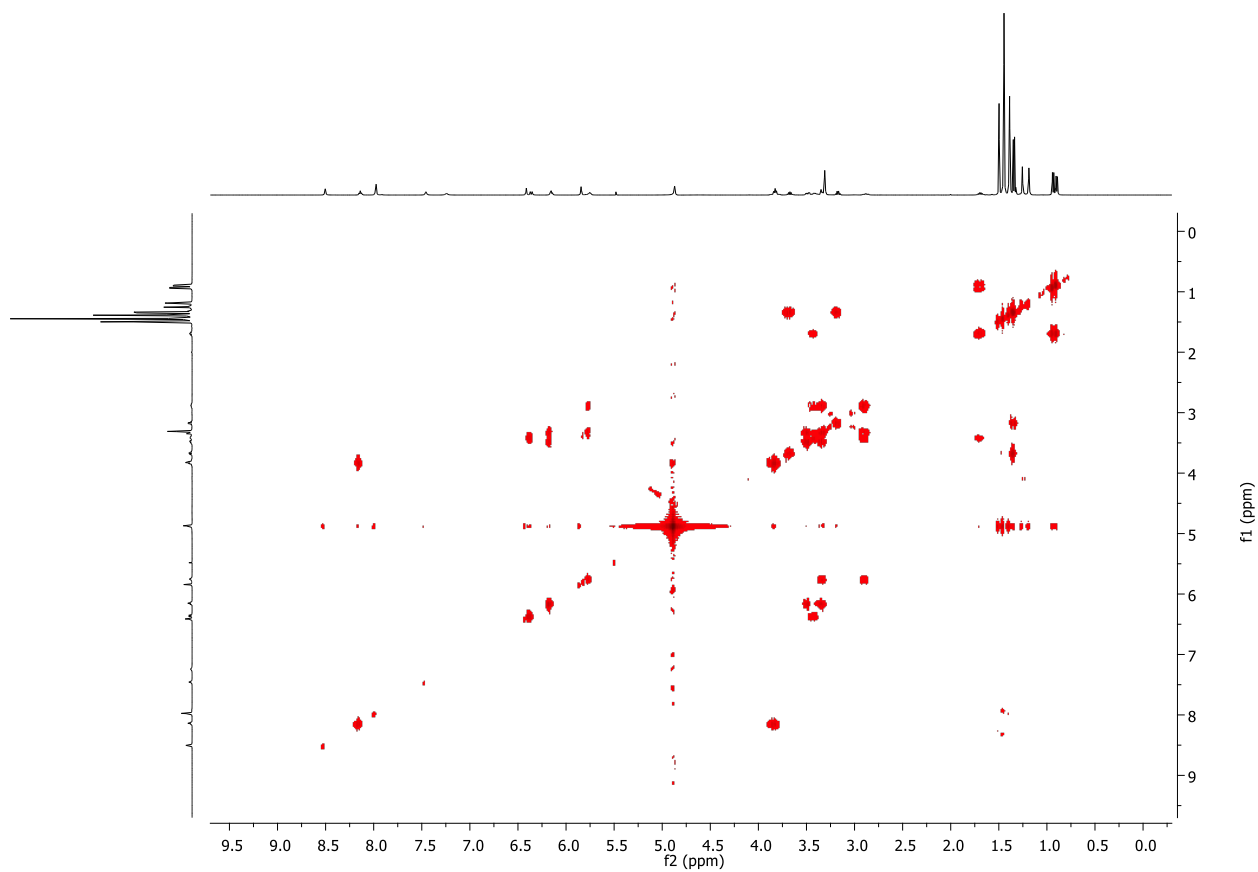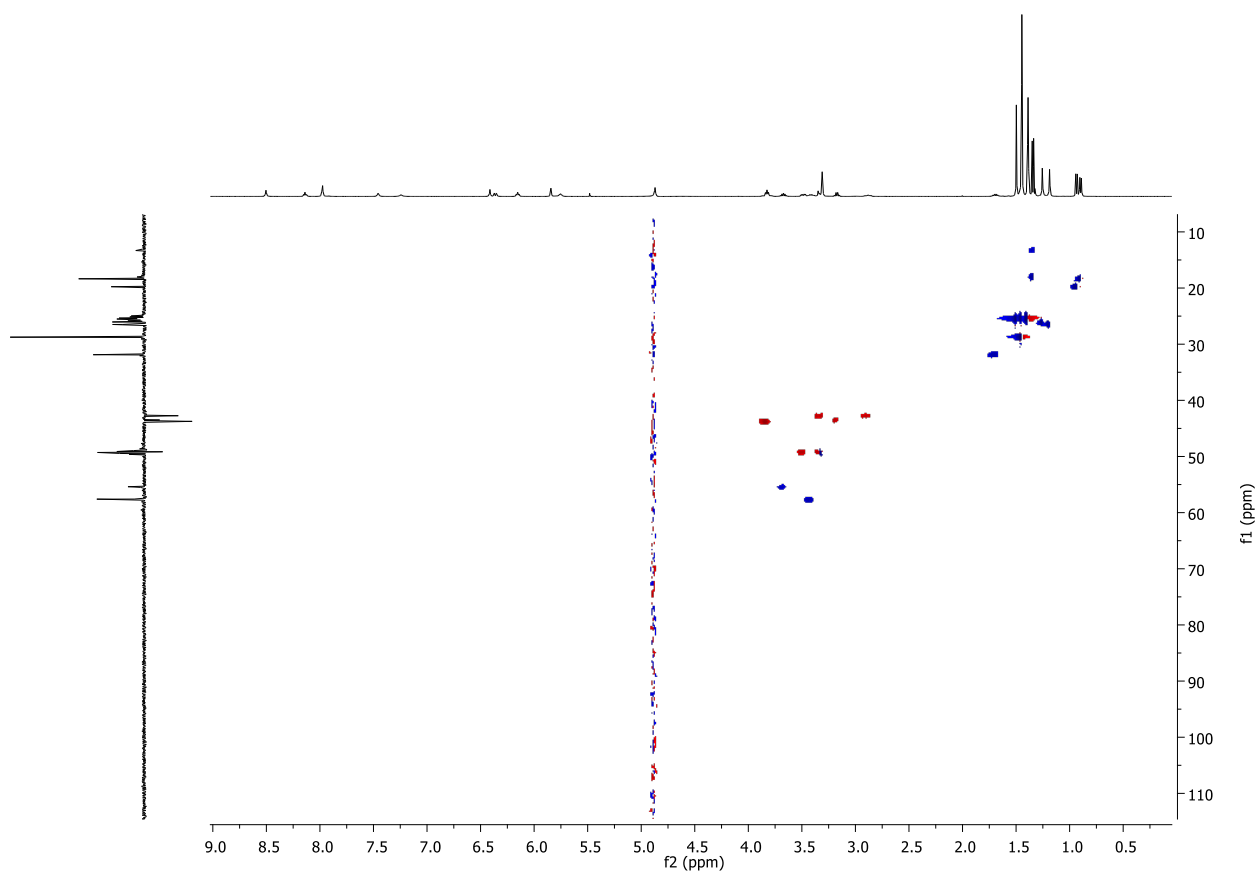

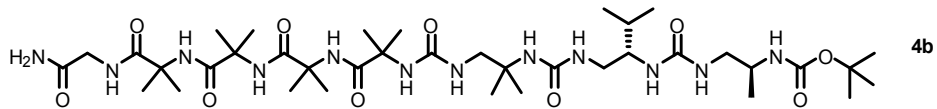

4b

Chemical shift values (ppm) for the <sup>1</sup>H NMR spectrum:

4.215.87, 4.075.82, 4.069.51, 4.063.11, 4.001.92, 3.981.61, 3.716.00, 3.615.91, 3.577.80, 3.338.62, 3.271.40, 3.175.45, 3.170.21, 3.071.06, 3.065.10, 3.059.23, 3.002.49, 2.922.77, 2.912.64, 2.892.74, 2.889.16, 2.884.16, 2.880.53, 1.953.45, 1.946.77, 1.936.03, 1.929.41, 1.894.14, 1.888.10, 1.876.70, 1.870.73, 1.855.10, 1.792.82, 1.702.95, 1.667.16, 1.380.50, 1.375.51, 1.366.06, 1.356.78, 1.254.63, 881.82, 795.65, 750.75, 723.96, 720.55, 700.68, 695.68, 692.32, 647.55, 597.08, 592.76, 590.43, 585.89, 542.85, 483.65, 476.79, 461.66, 454.75

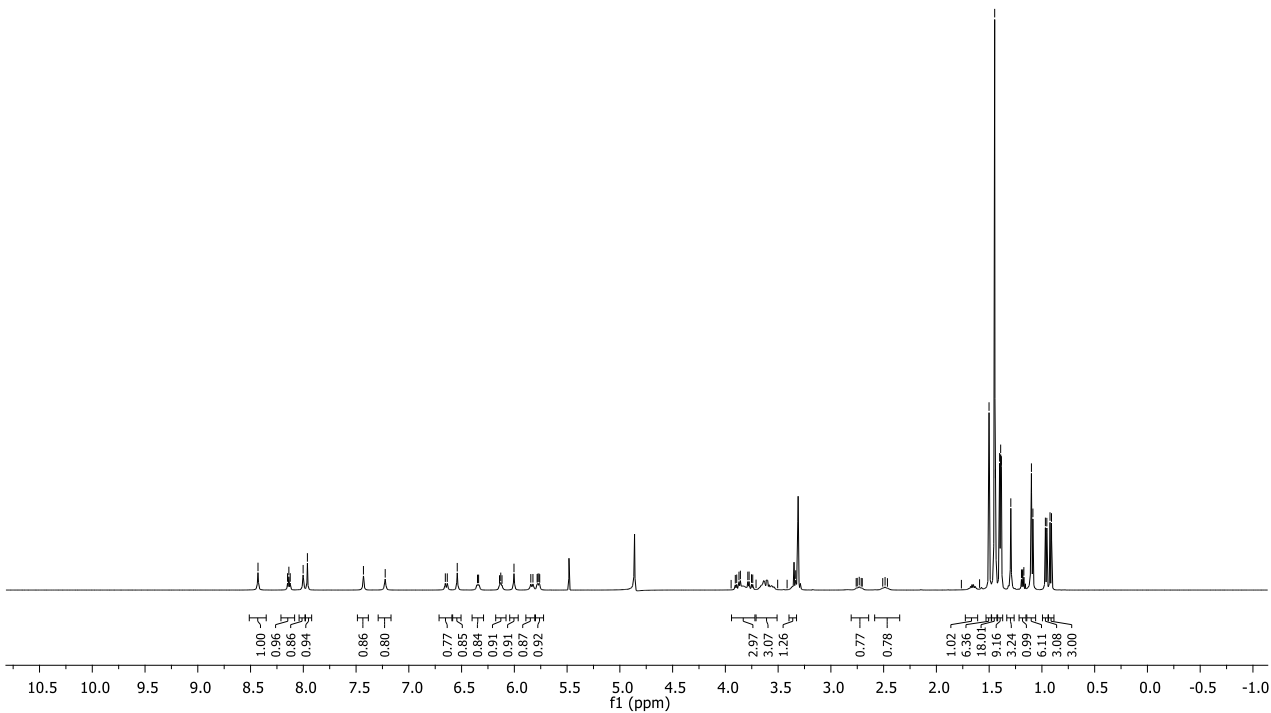

Chemical shift values (ppm) for the <sup>13</sup>C NMR spectrum:

178.14, 178.11, 178.09, 177.97, 175.41, 161.60, 160.34, 160.20, 158.59, 80.18, 58.13, 58.01, 57.52, 57.00, 56.17, 54.68, 54.00, 47.74, 47.47, 44.24, 43.24, 38.73, 28.73, 26.90, 26.39, 26.02, 25.95, 25.80, 25.48, 25.01, 24.63, 24.49, 19.91, 18.67, 18.49

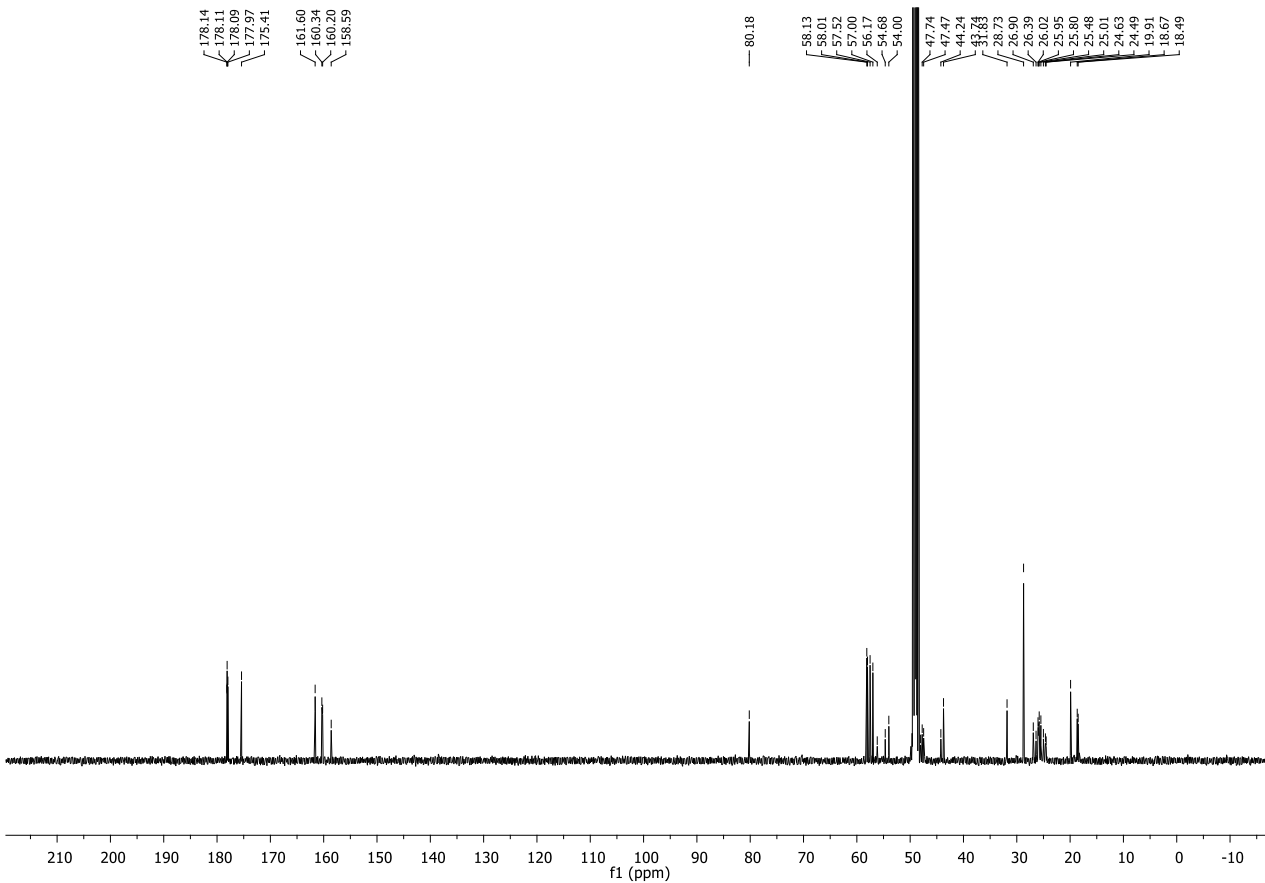

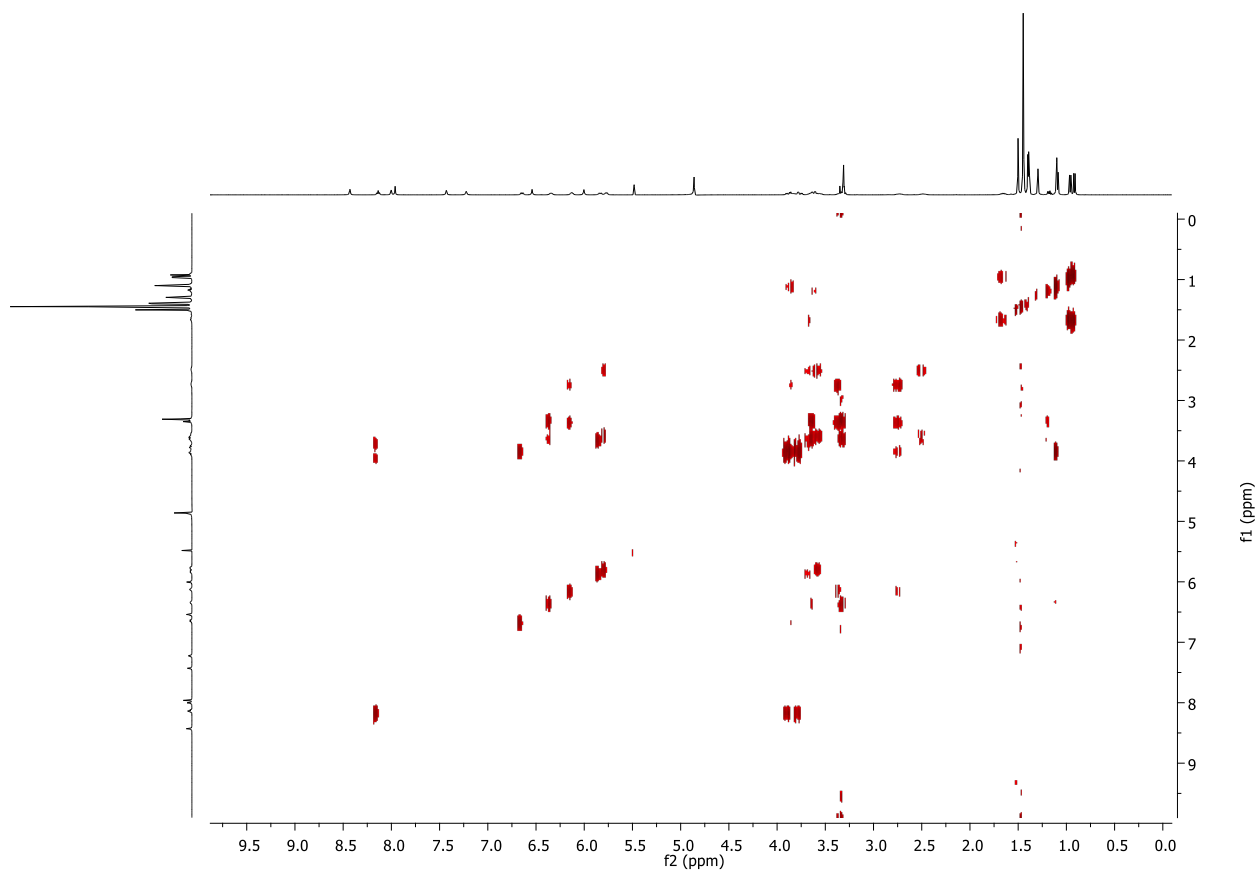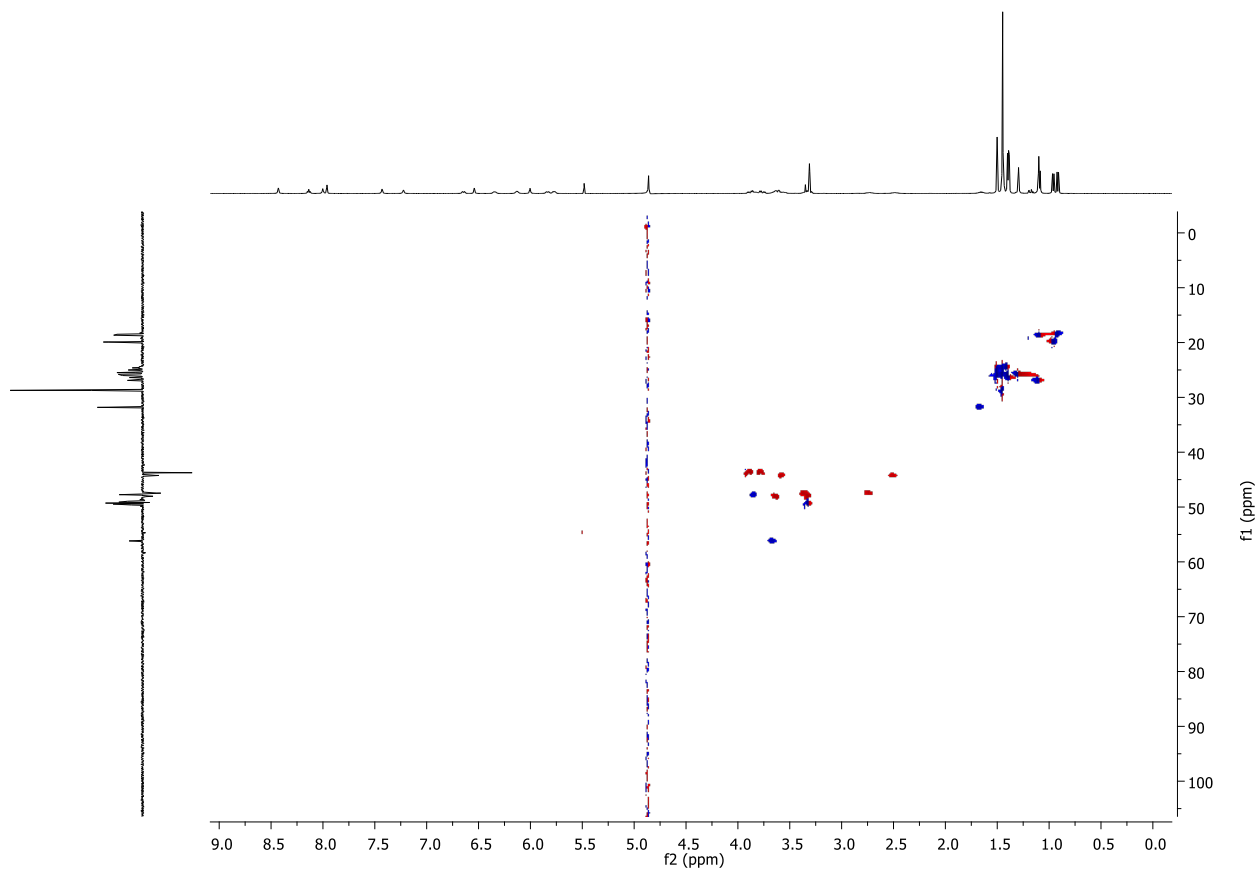

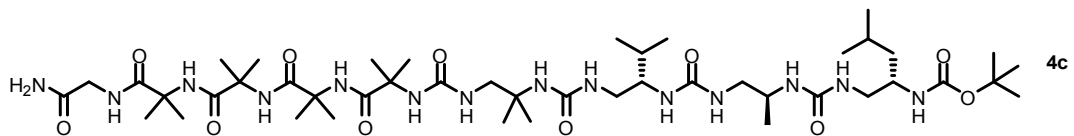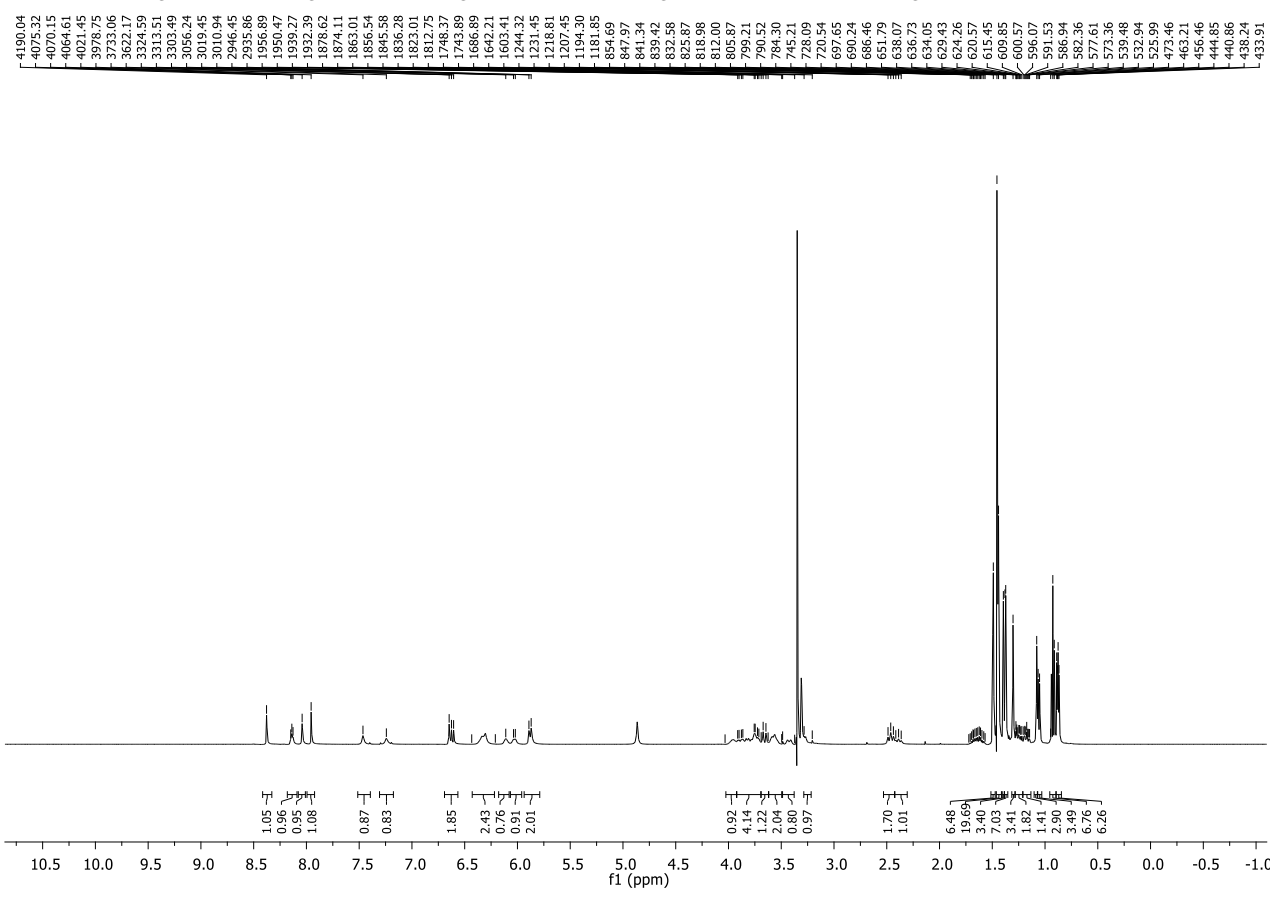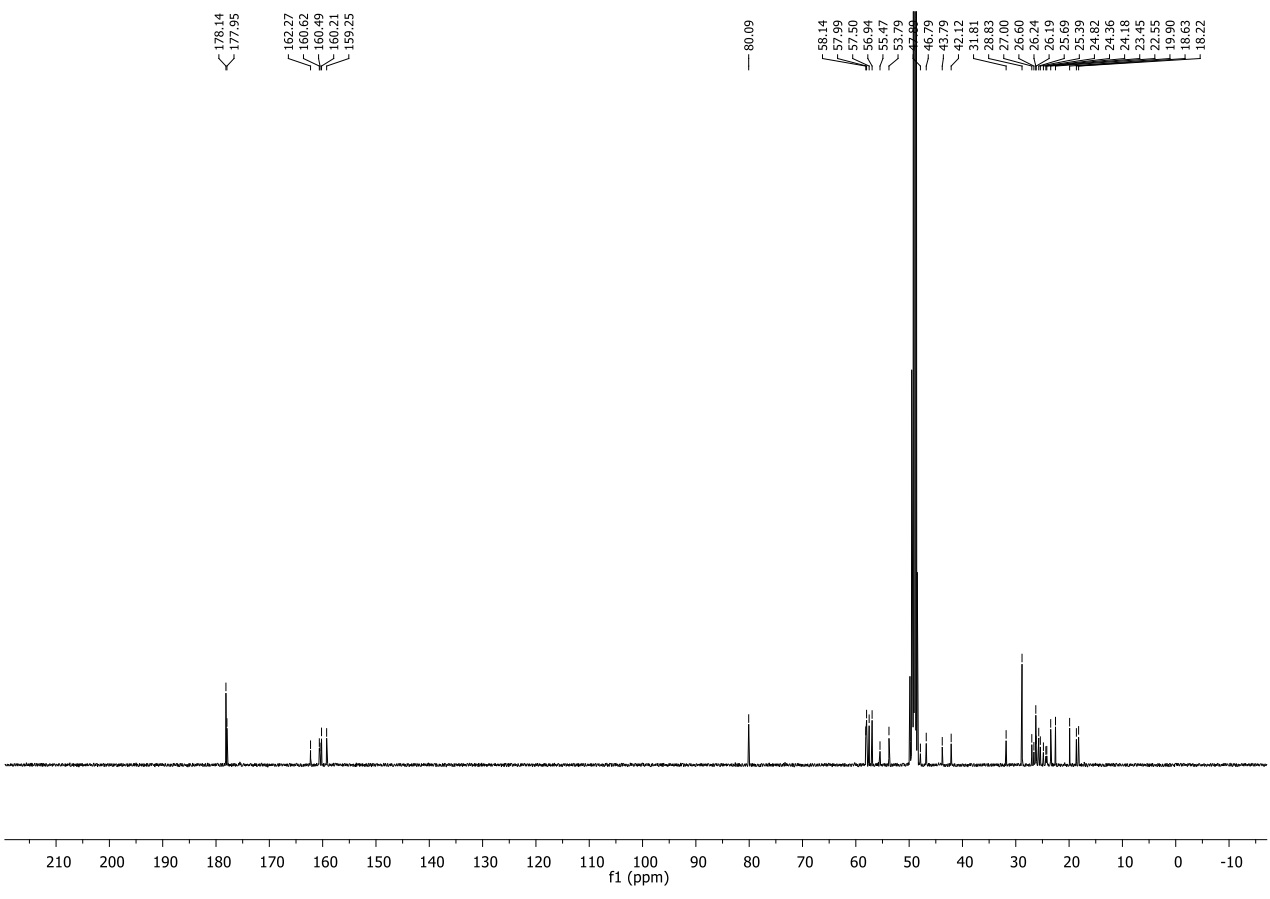

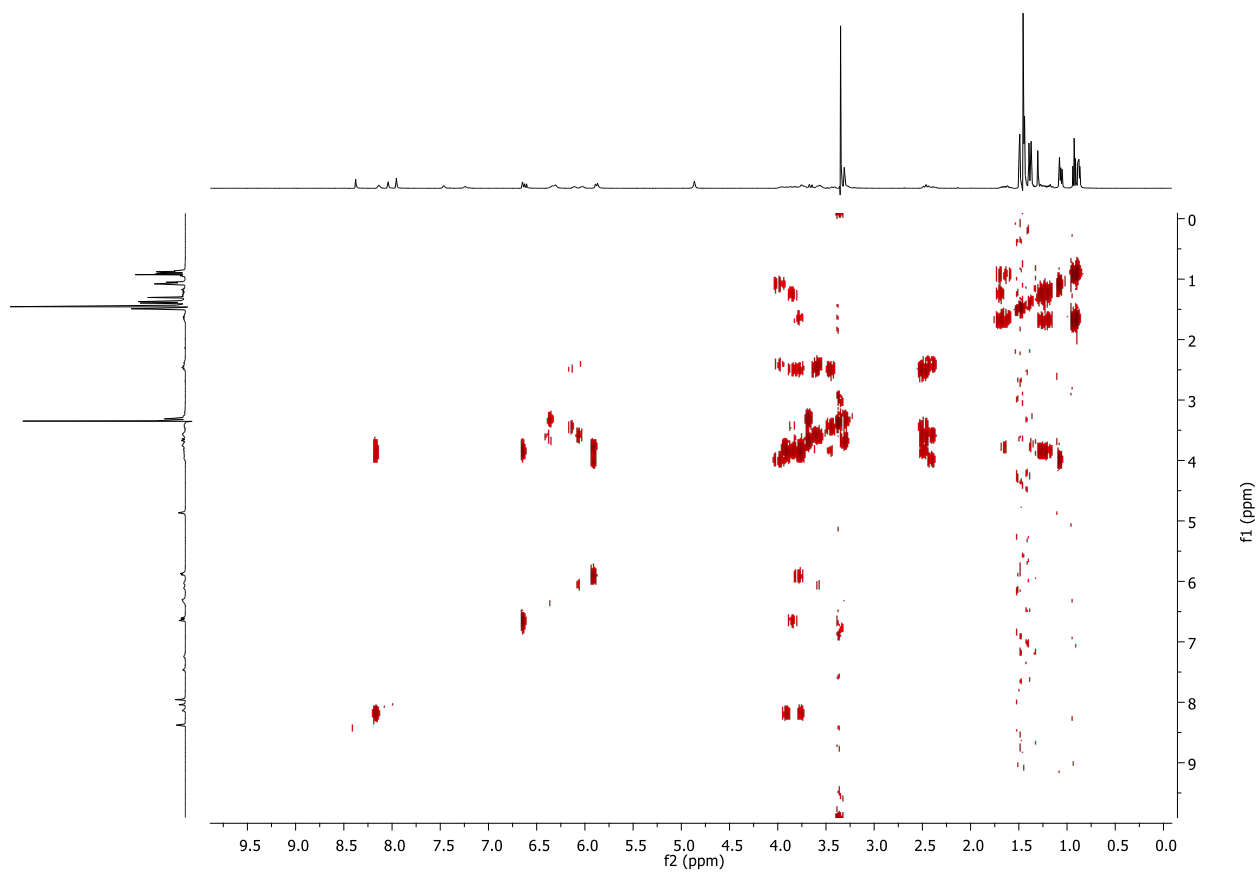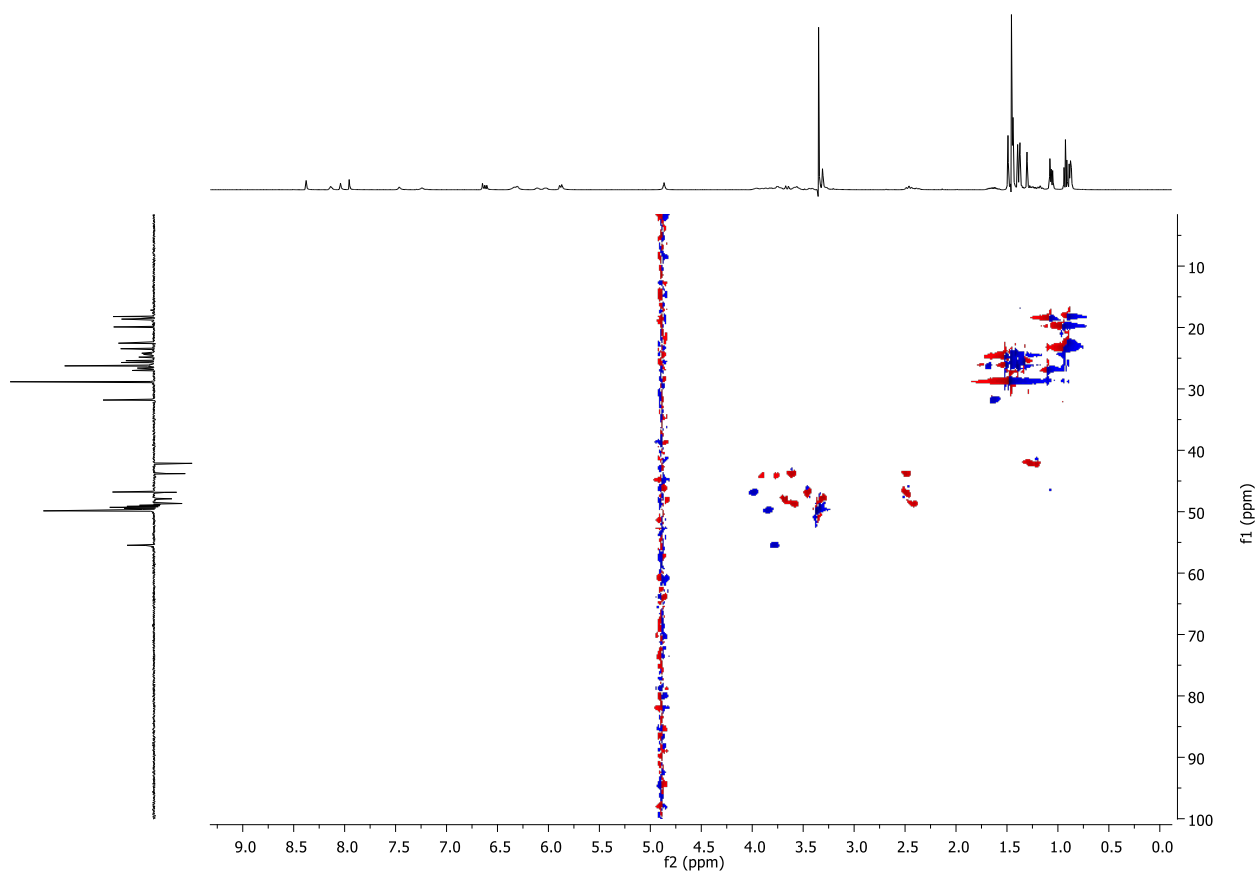

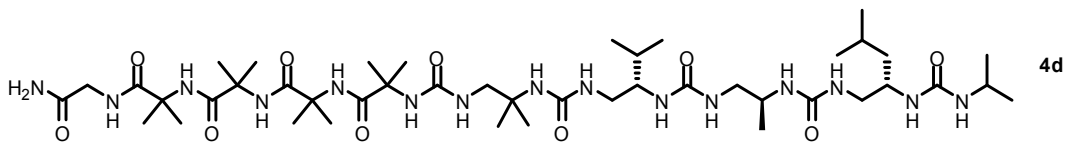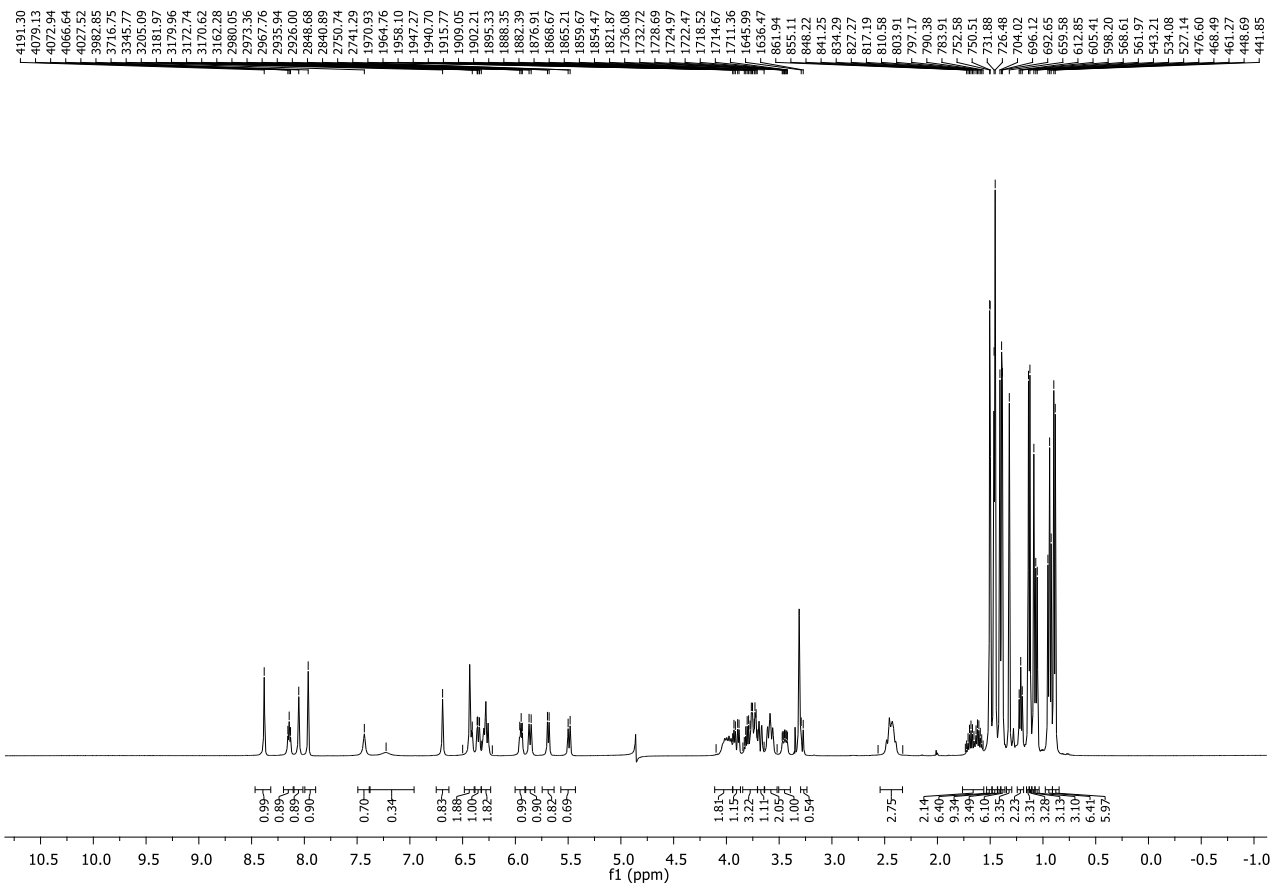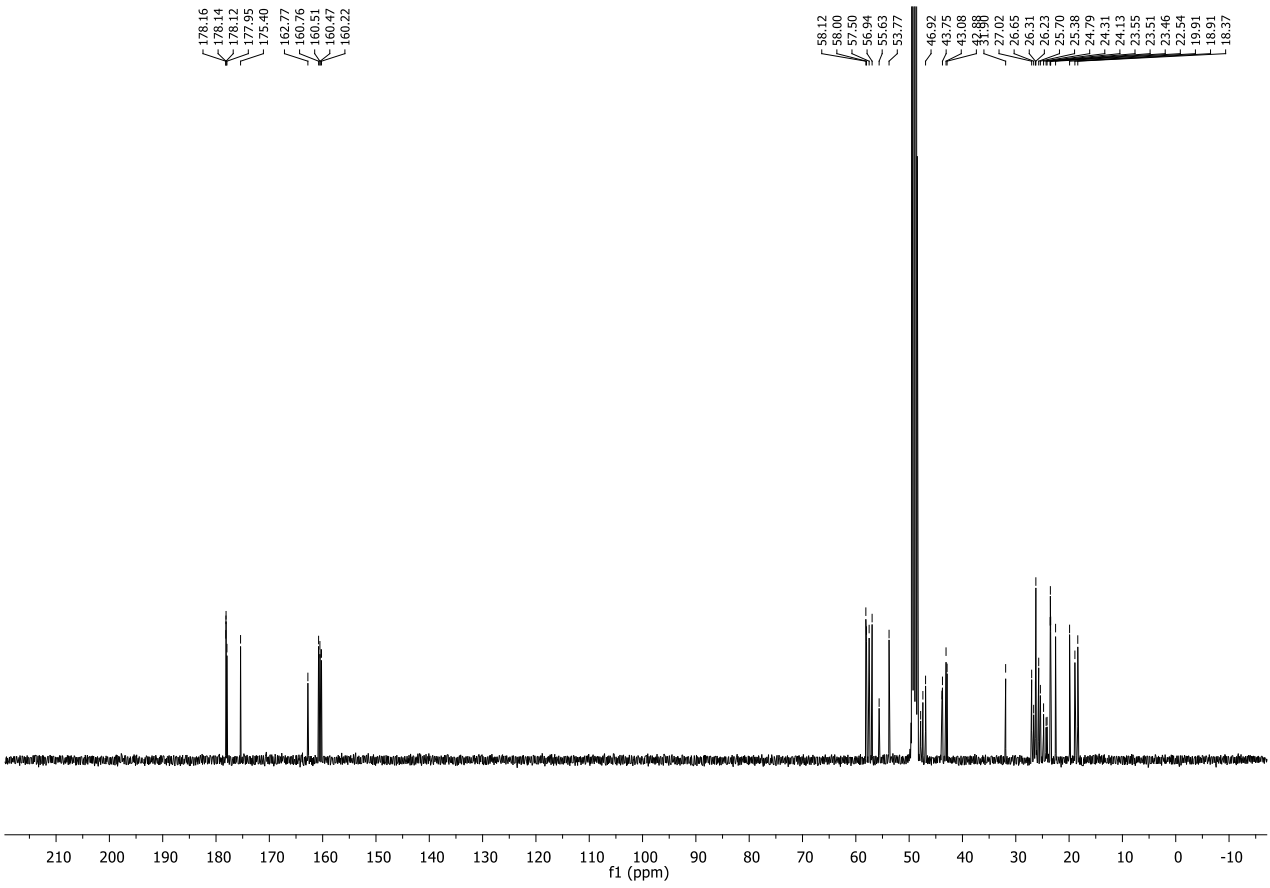

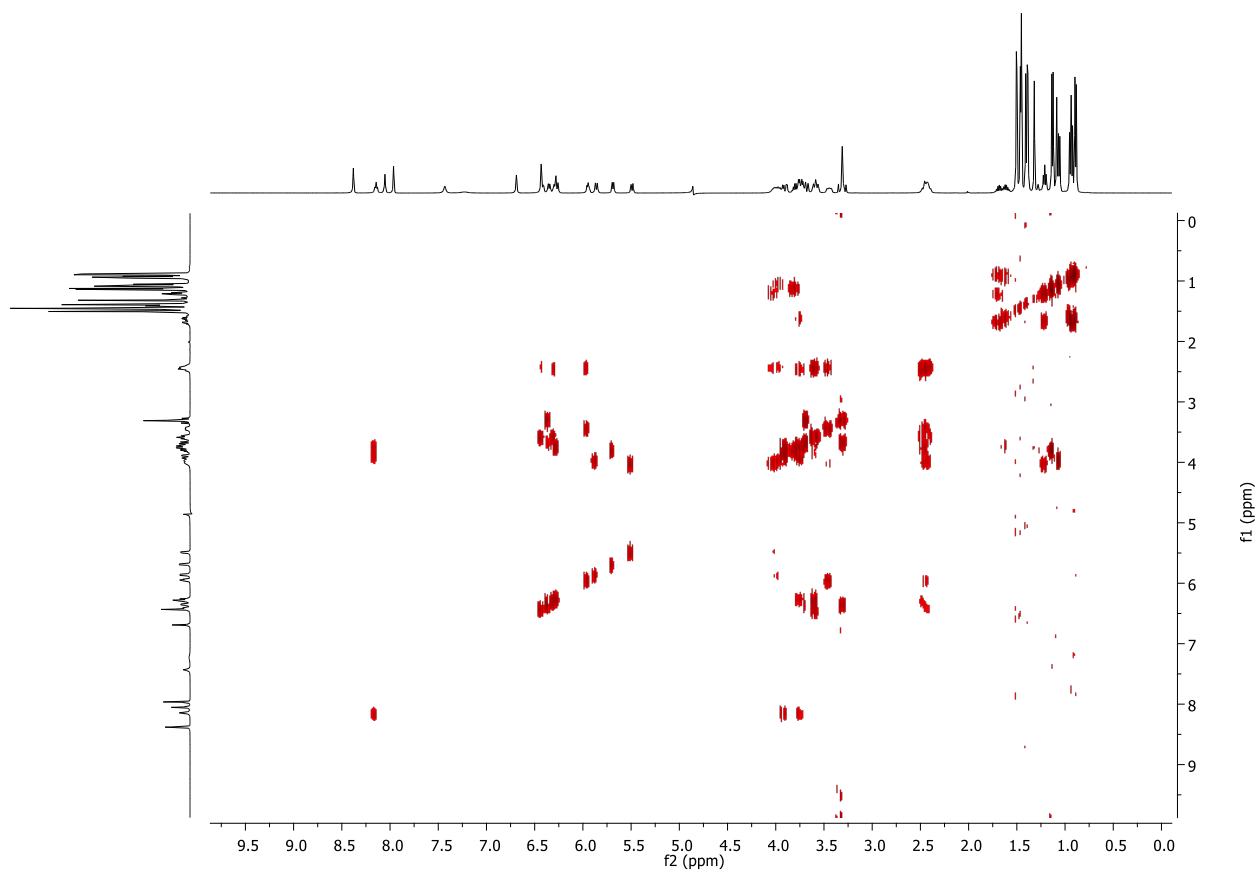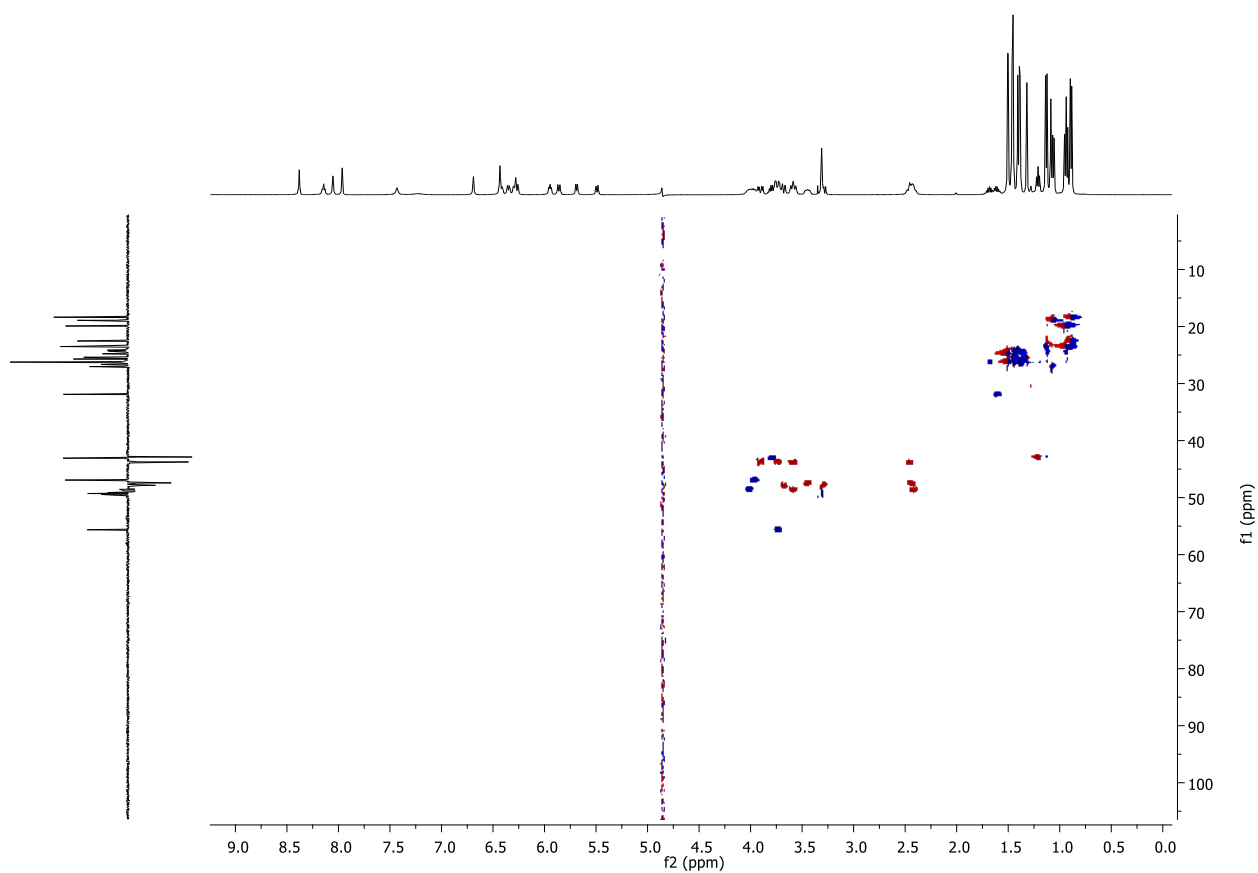

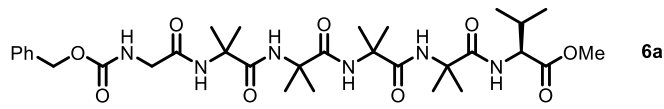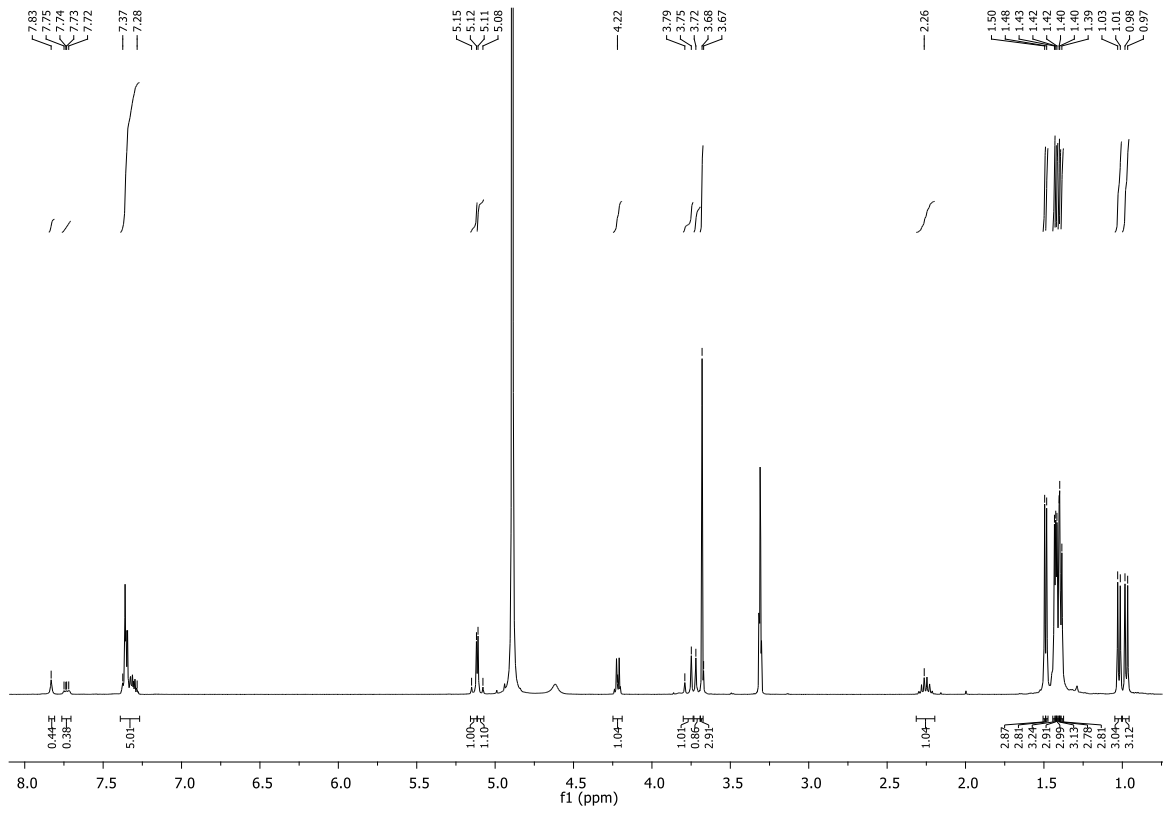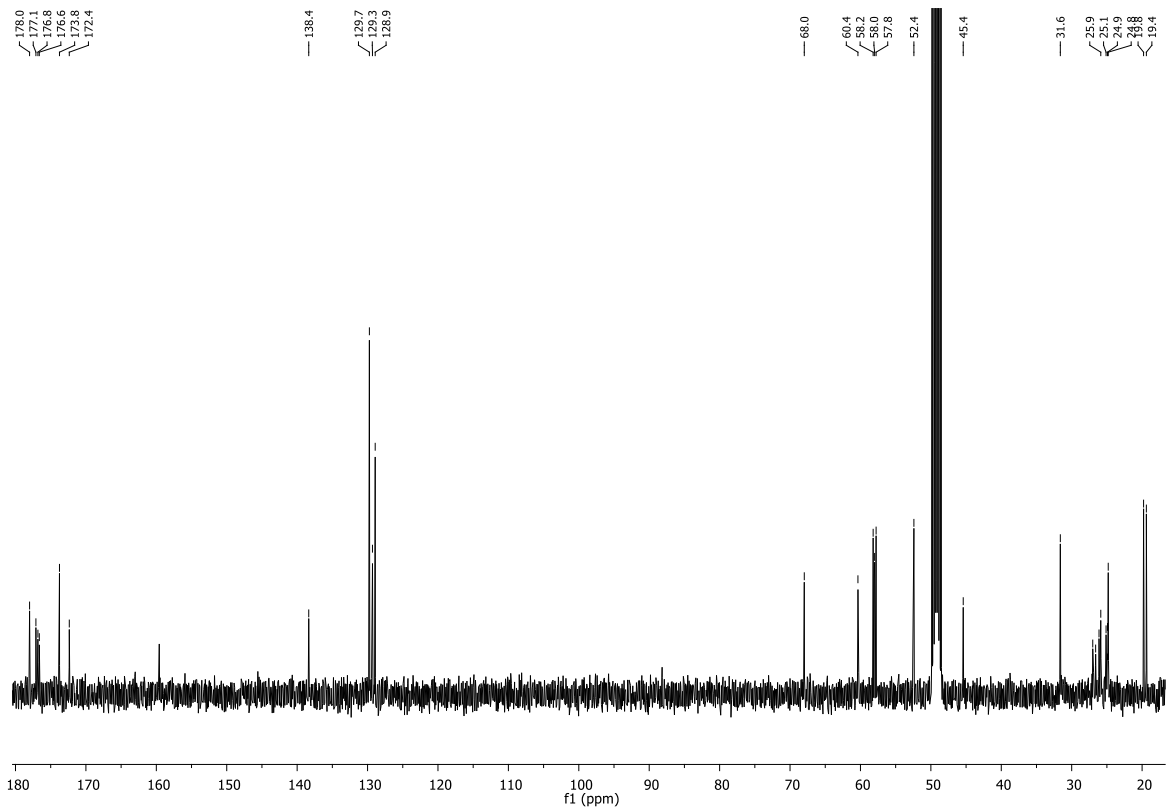







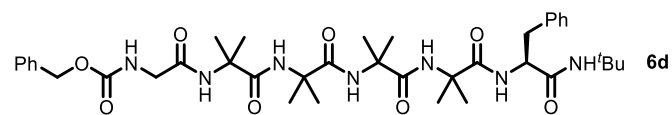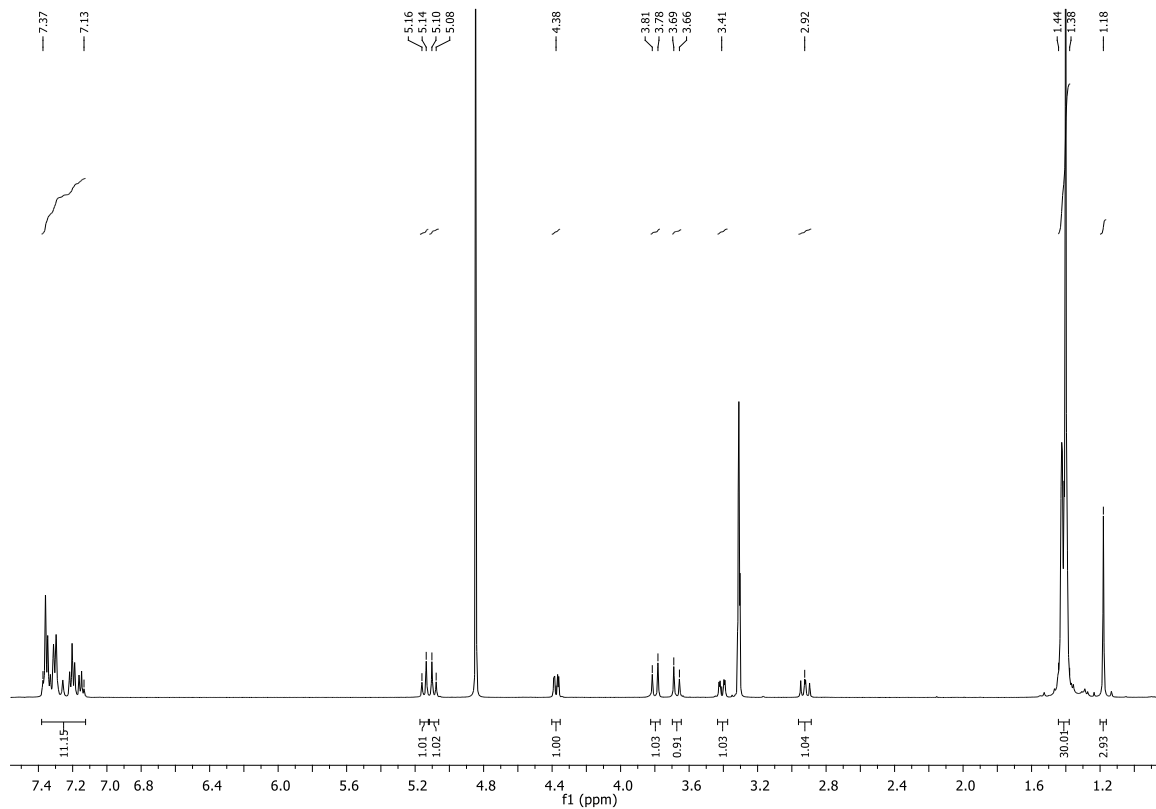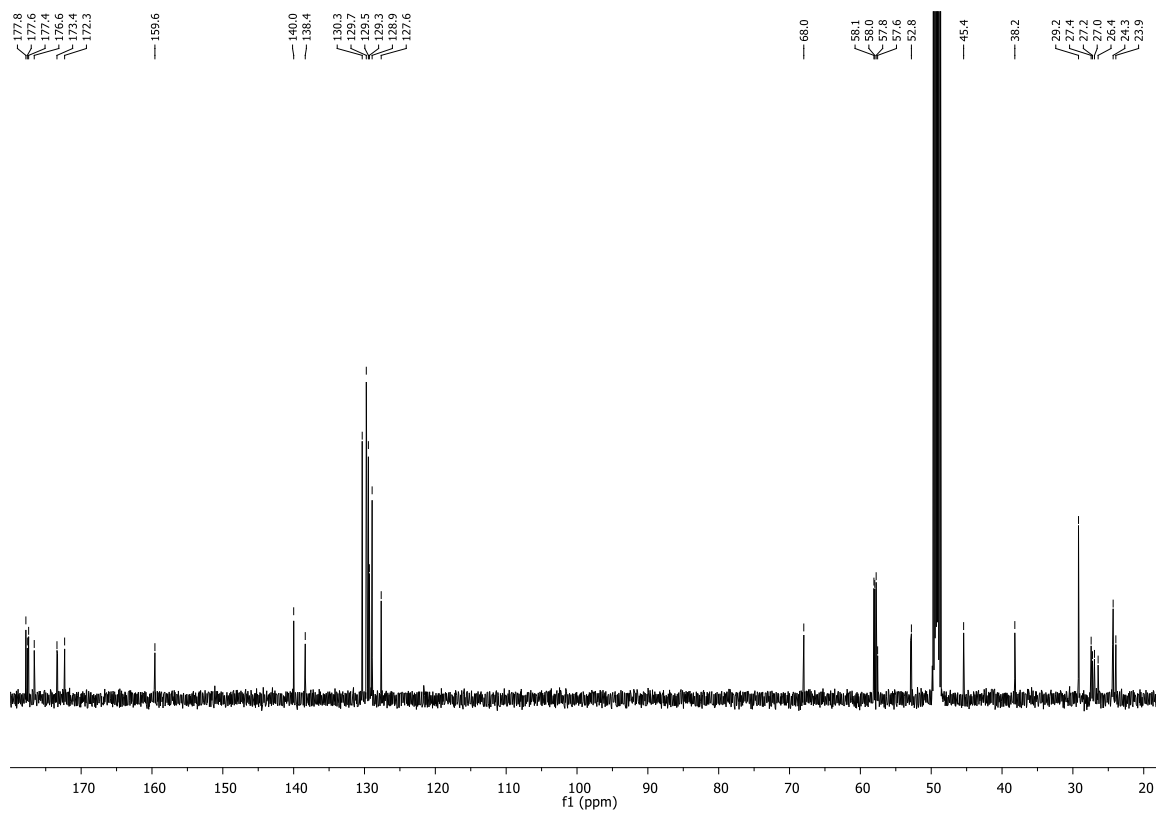

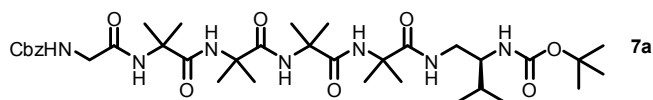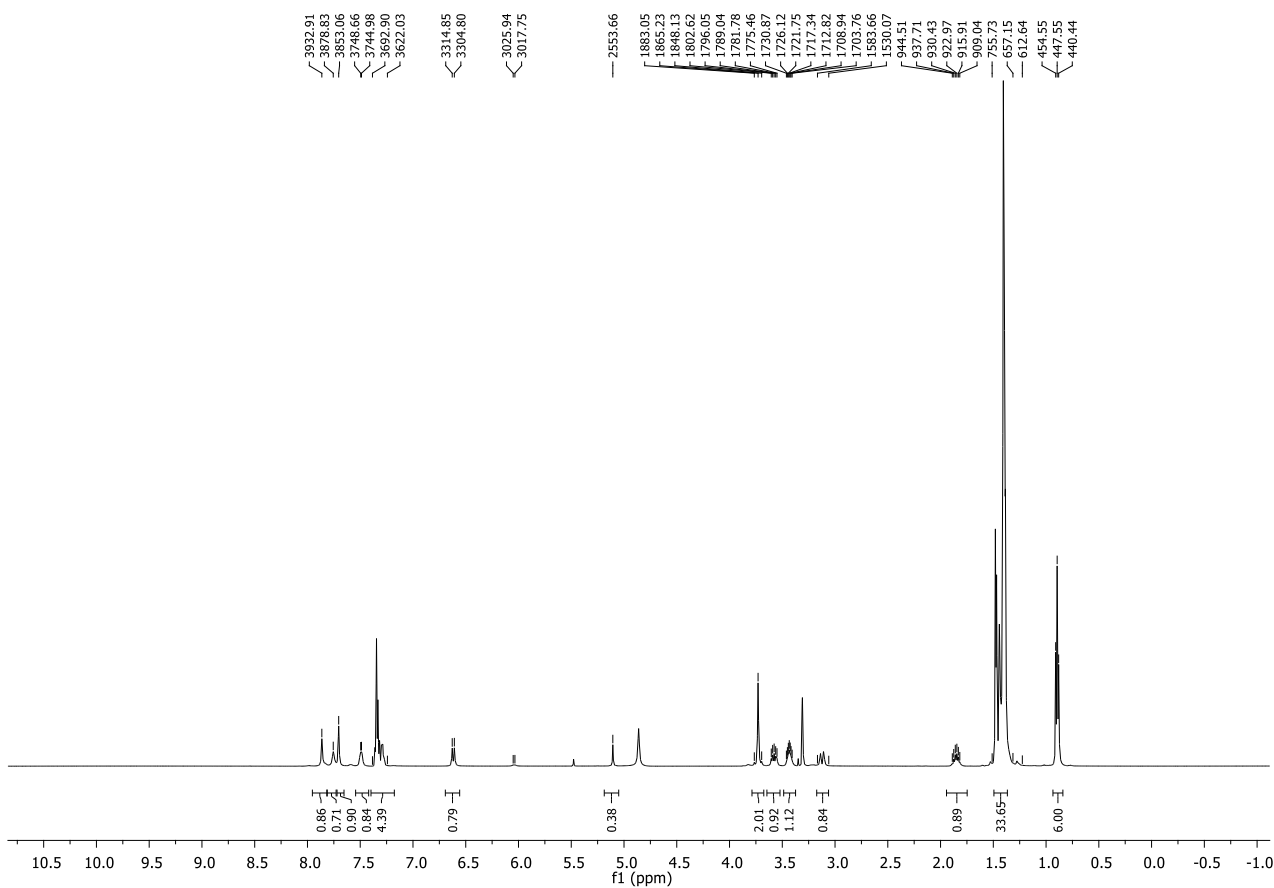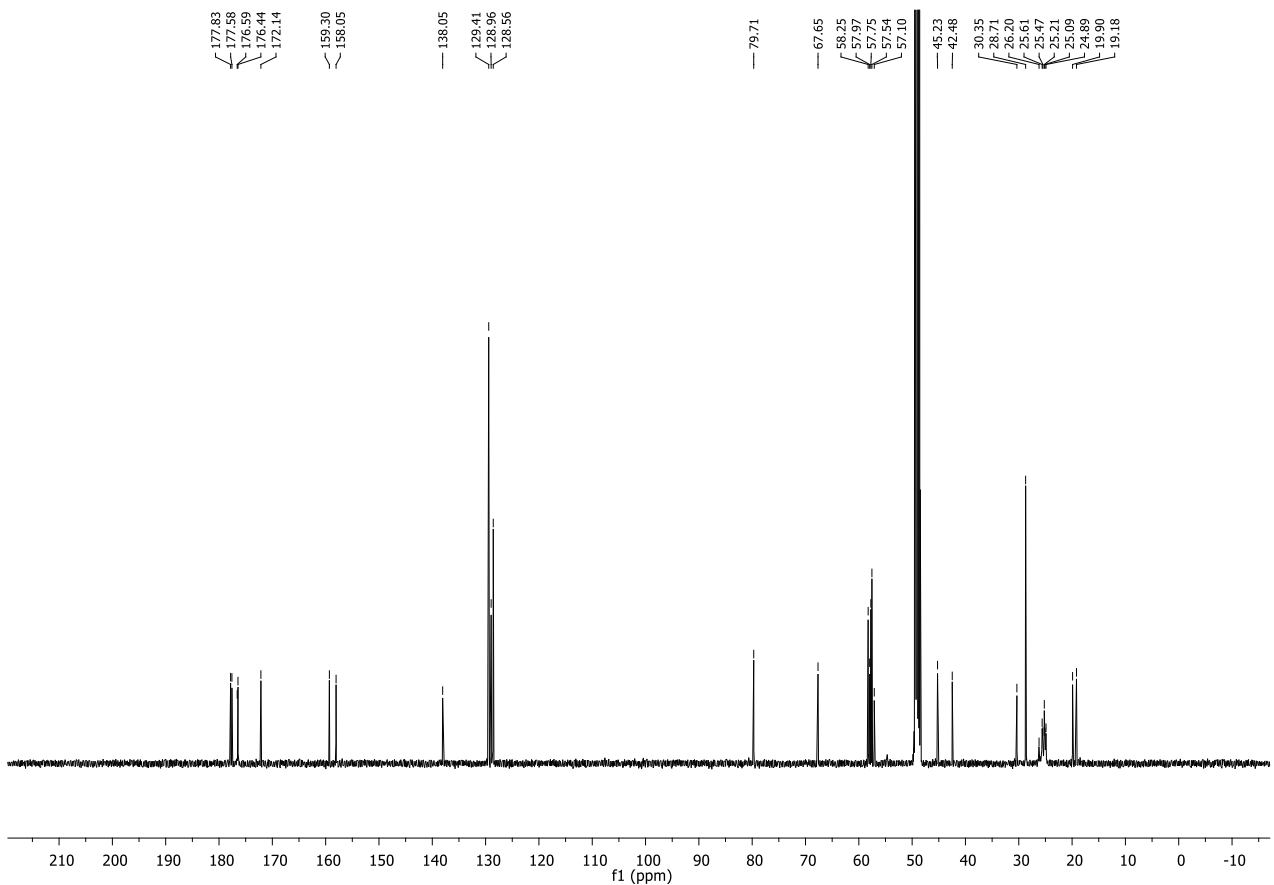

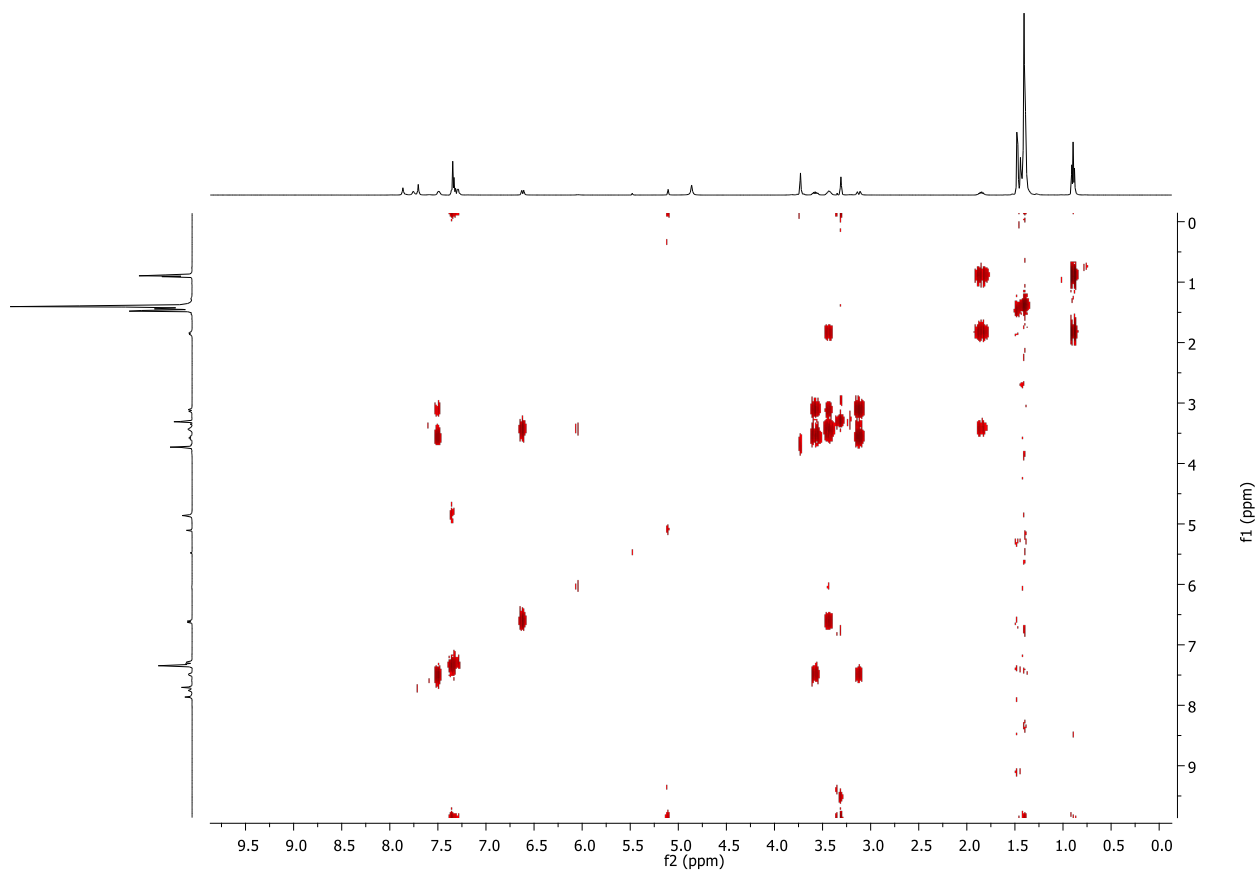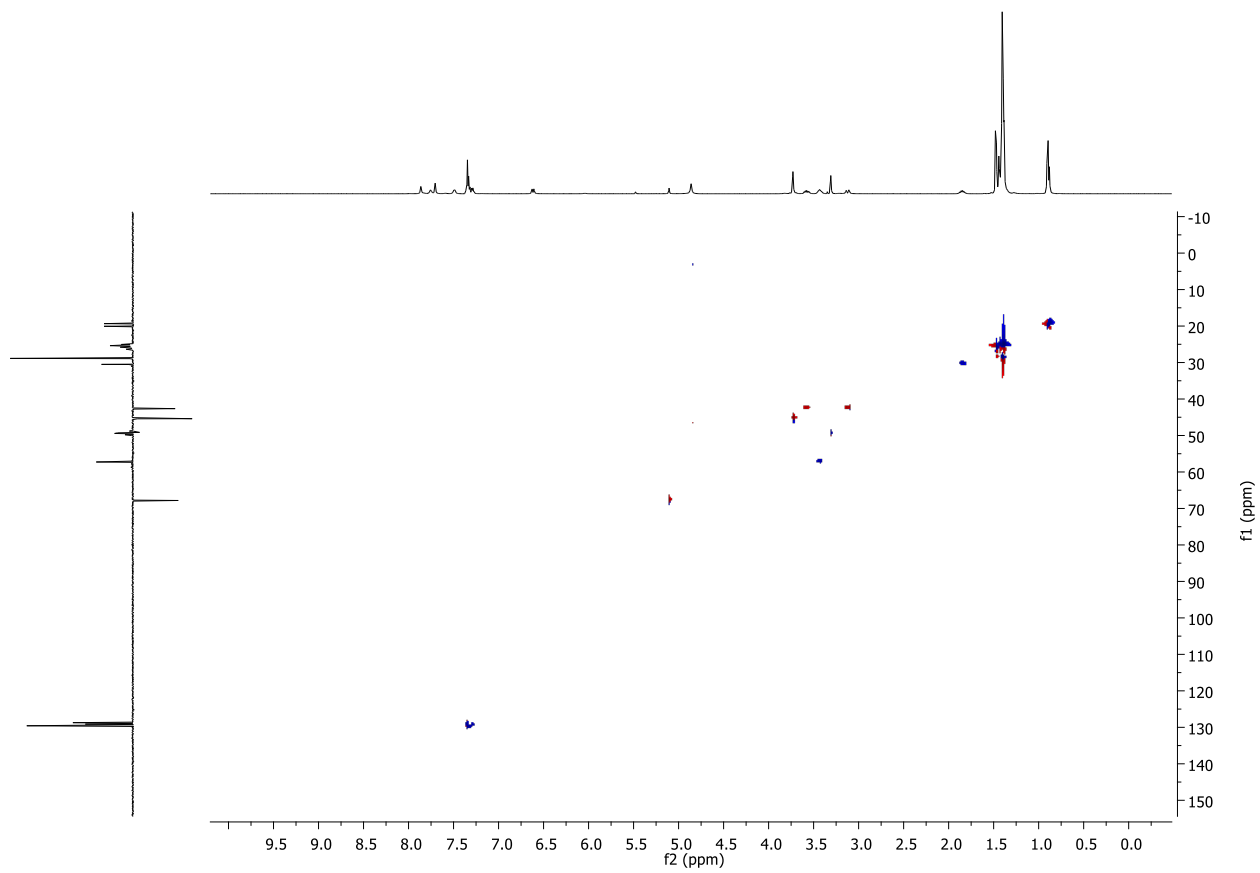

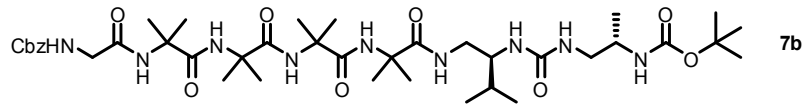

- <sup>1</sup>H NMR chemical shifts (ppm):
- 7.998, 7.870, 7.858, 7.739, 7.734, 7.728, 7.692, 7.632
  - 6.321, 6.224, 6.185
  - 5.957, 5.791, 5.748
  - 2.552
  - 1.889, 1.865, 1.857, 1.848, 1.837, 1.807, 1.801, 1.794, 1.787, 1.780, 1.773, 1.762, 1.703, 1.666, 1.617, 1.587, 1.526
  - 0.948, 0.941, 0.934, 0.927, 0.920
  - 0.704, 0.536, 0.532, 0.465, 0.458, 0.449, 0.443

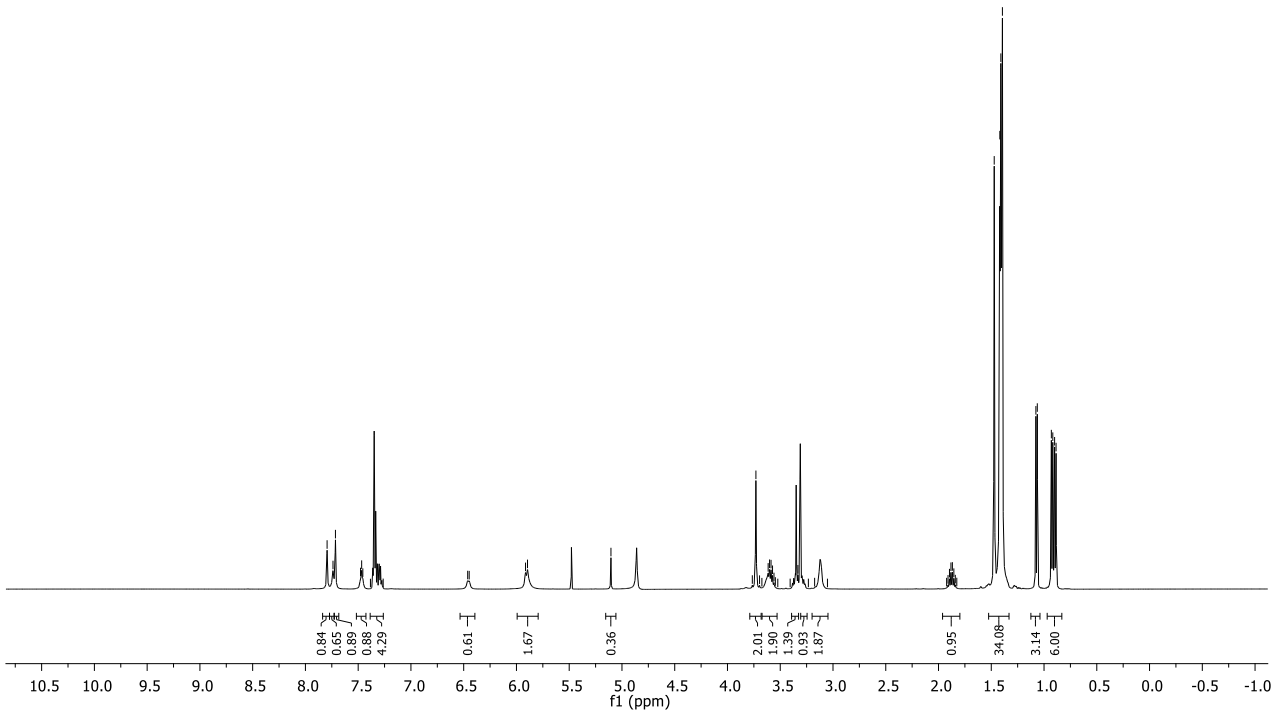

- <sup>13</sup>C NMR chemical shifts (ppm):
- 177.83, 177.44, 176.75, 176.45, 172.14
  - 160.97, 159.30, 157.94
  - 138.03, 129.42, 128.98, 128.60
  - 79.76, 67.66, 58.19, 57.93, 57.77, 57.55, 56.24
  - 46.02, 45.24, 42.36, 30.42, 28.68, 25.66, 25.42, 25.20, 25.11, 24.97, 20.07, 18.57, 18.48

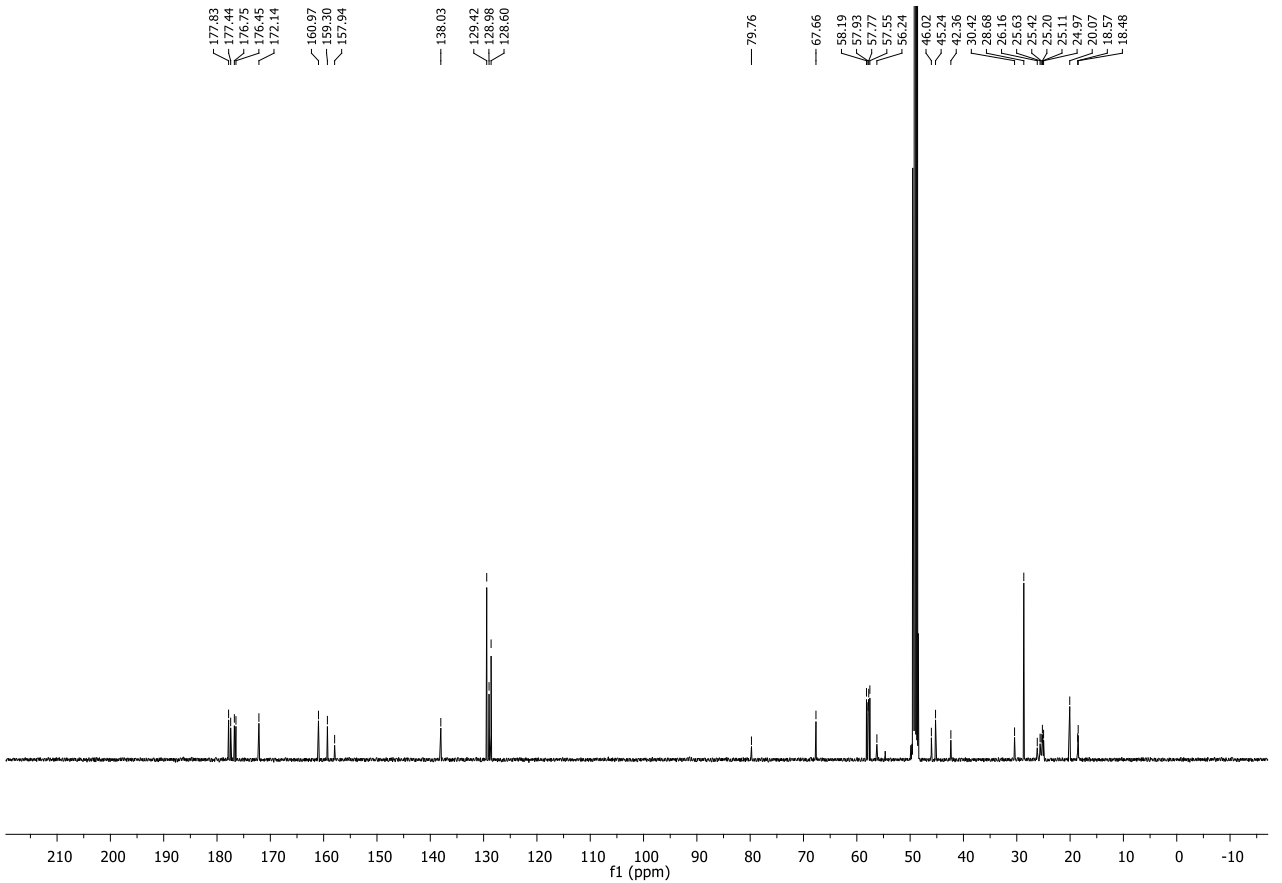

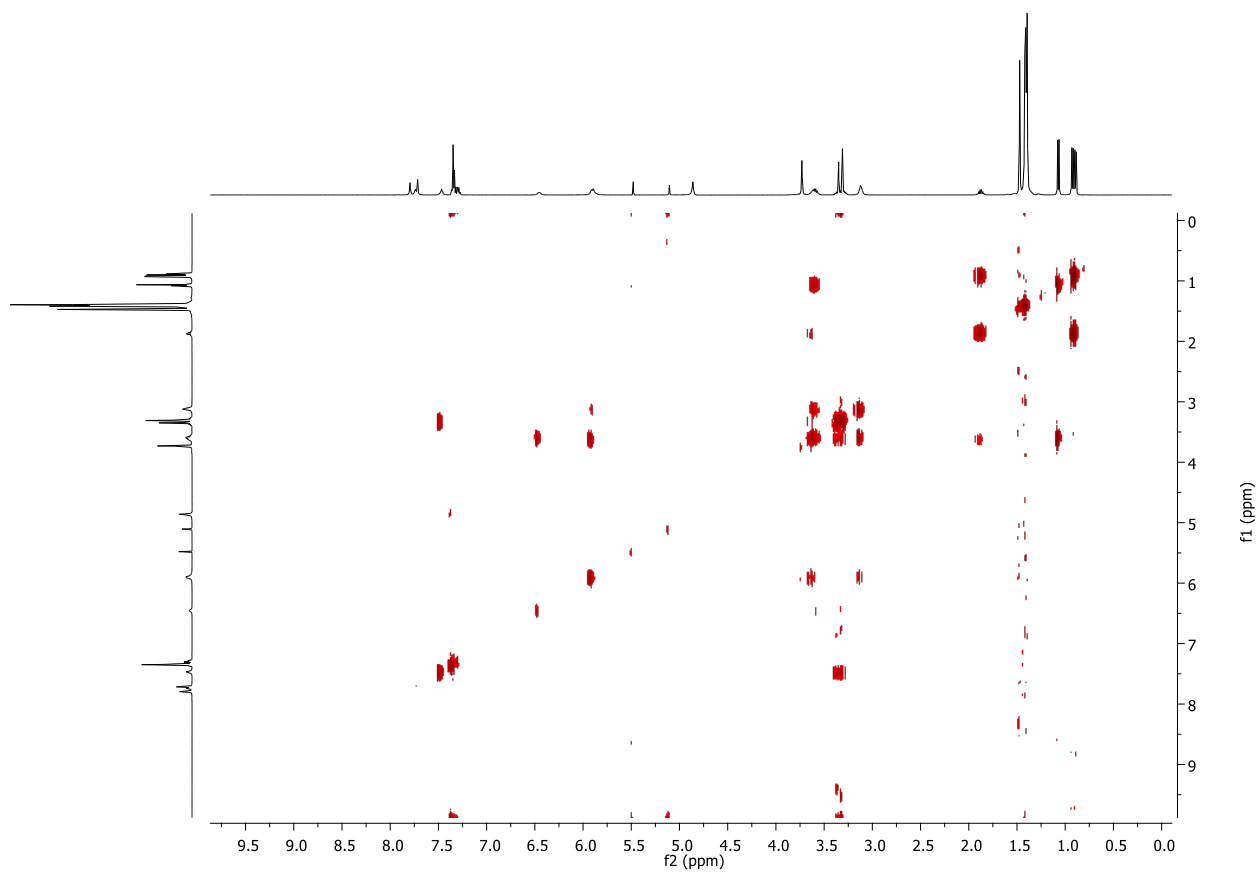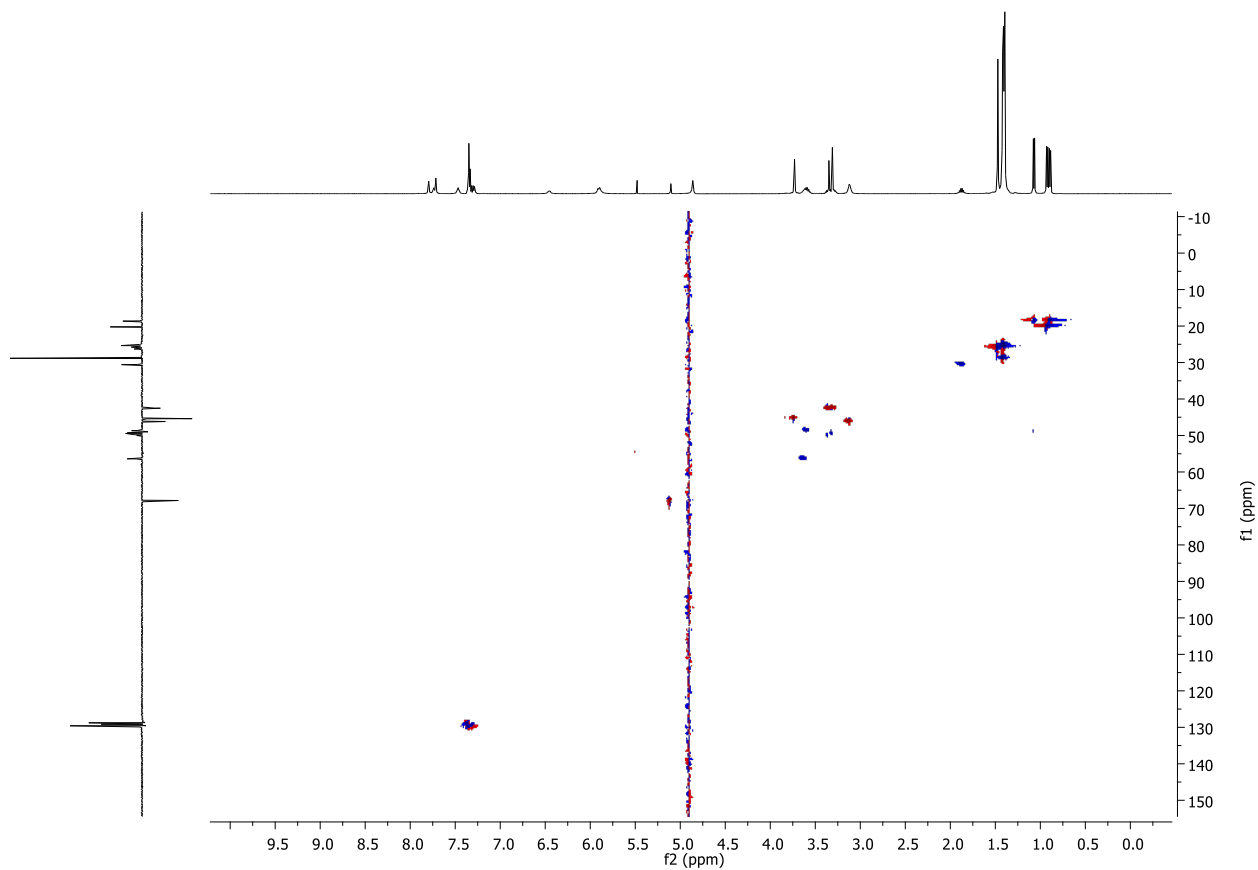

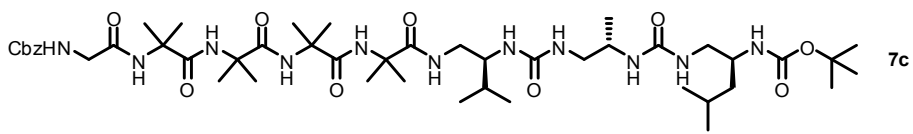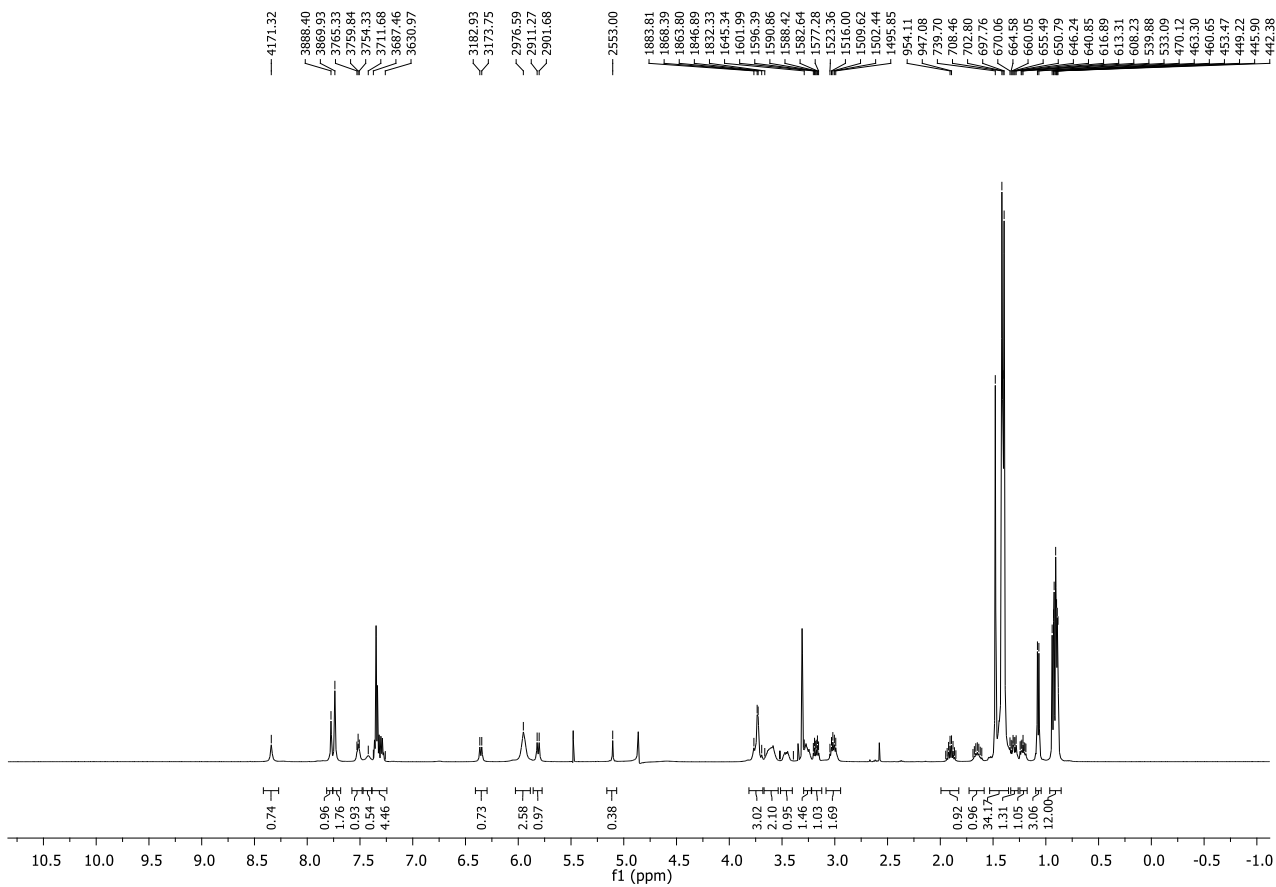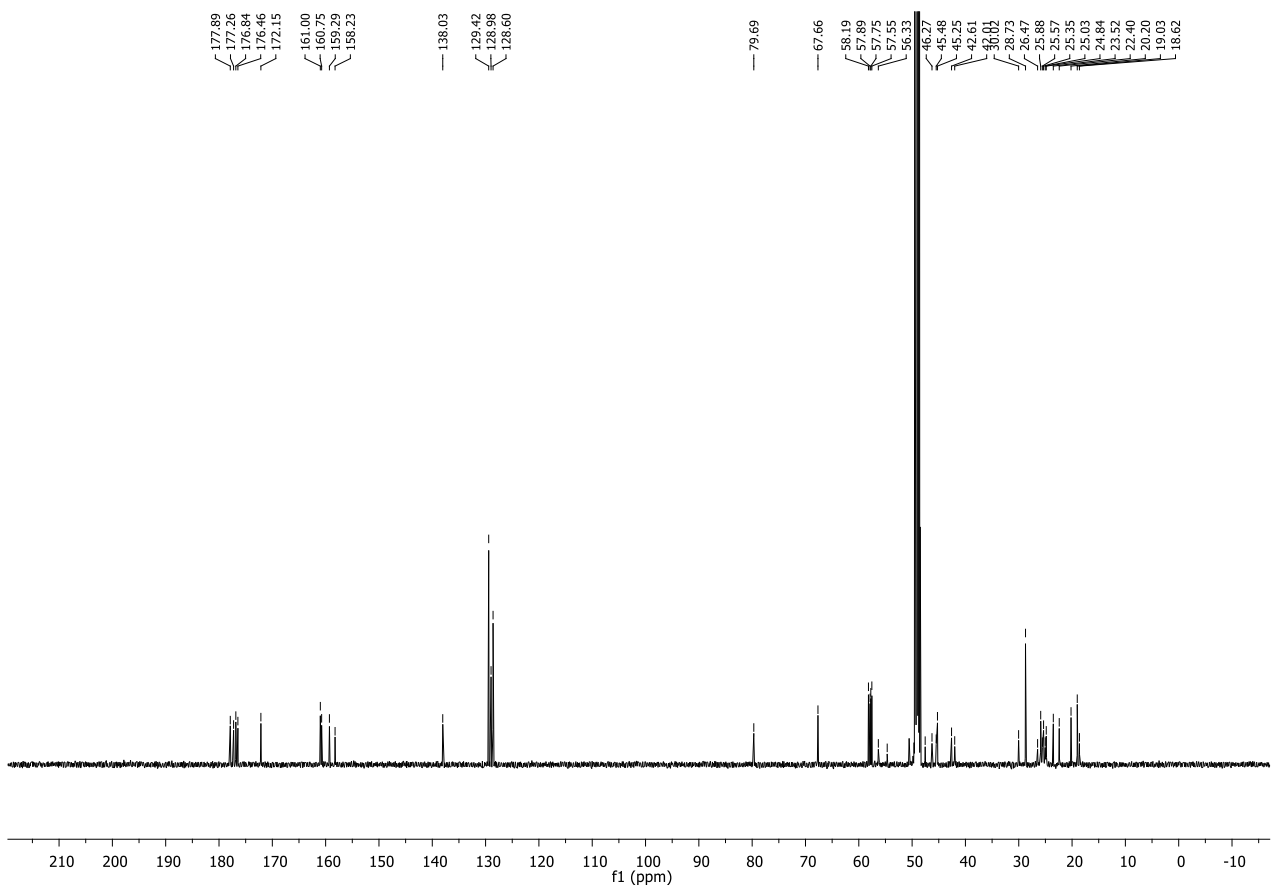



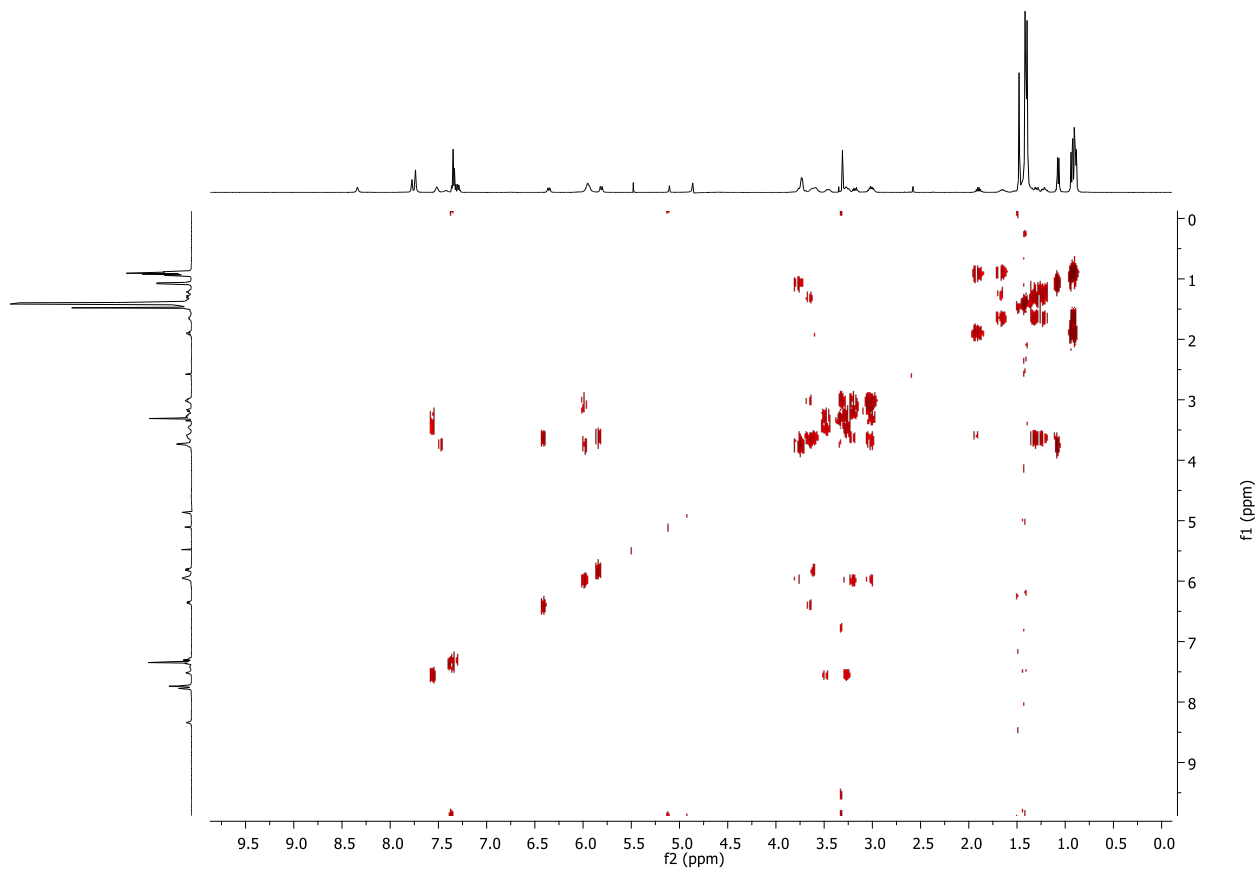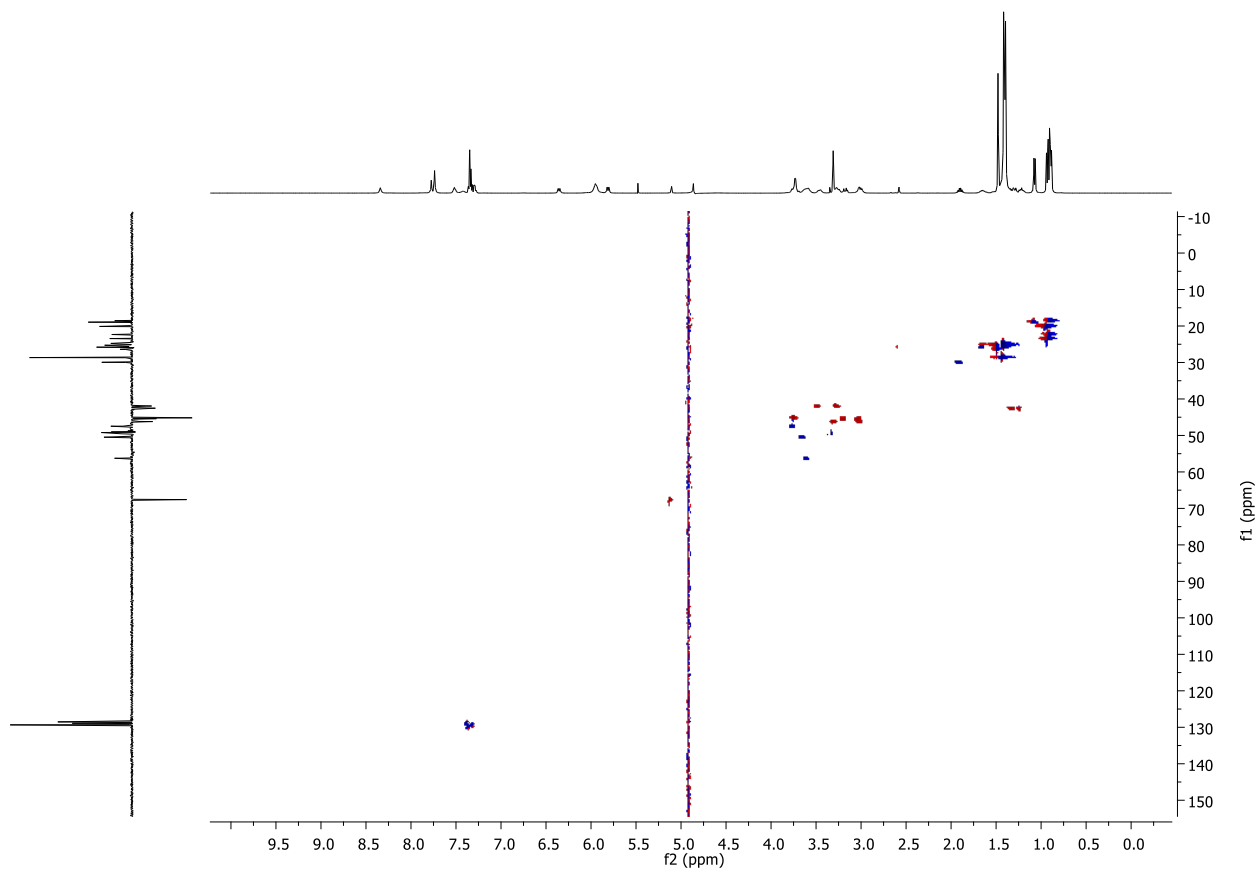

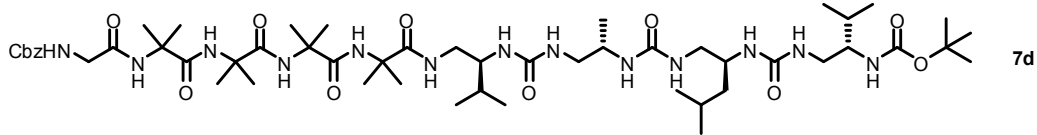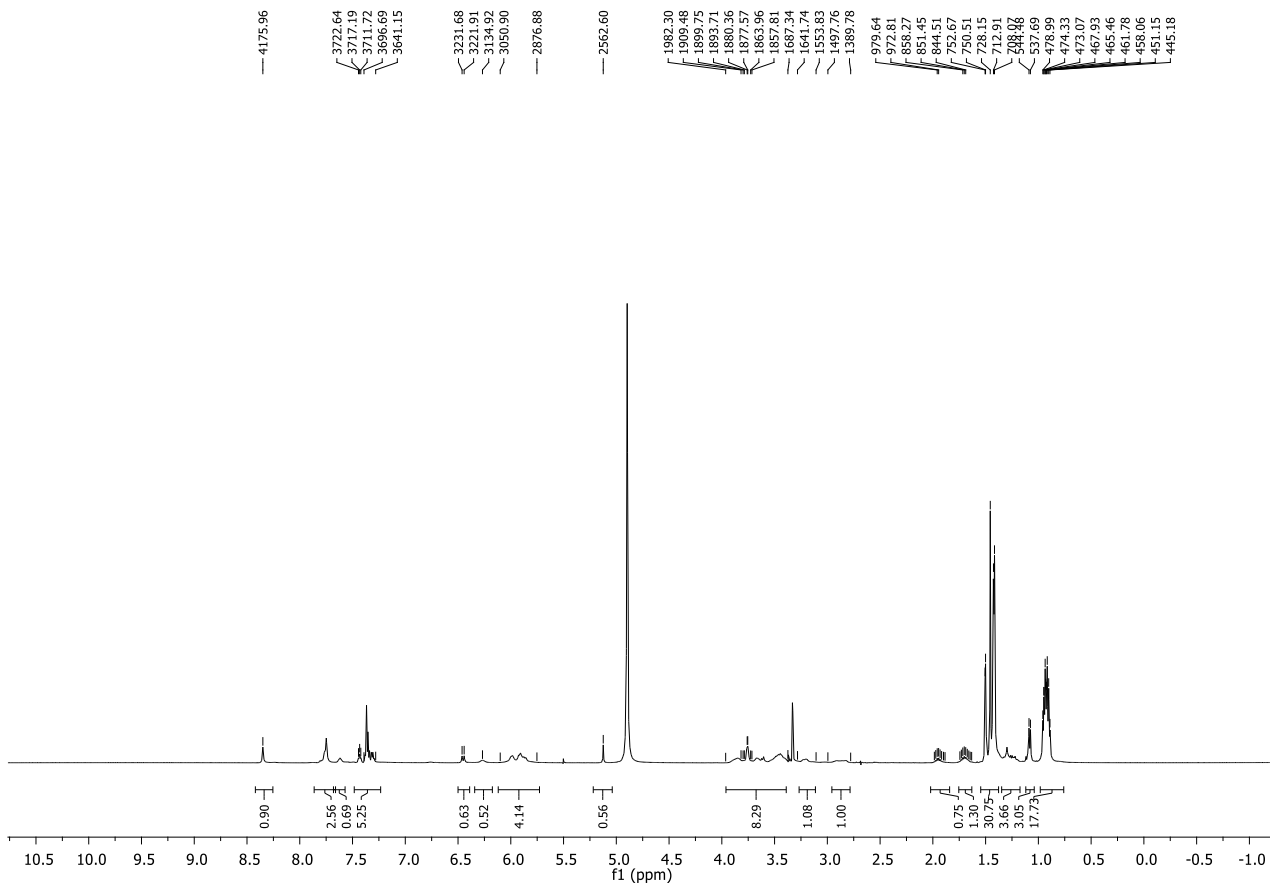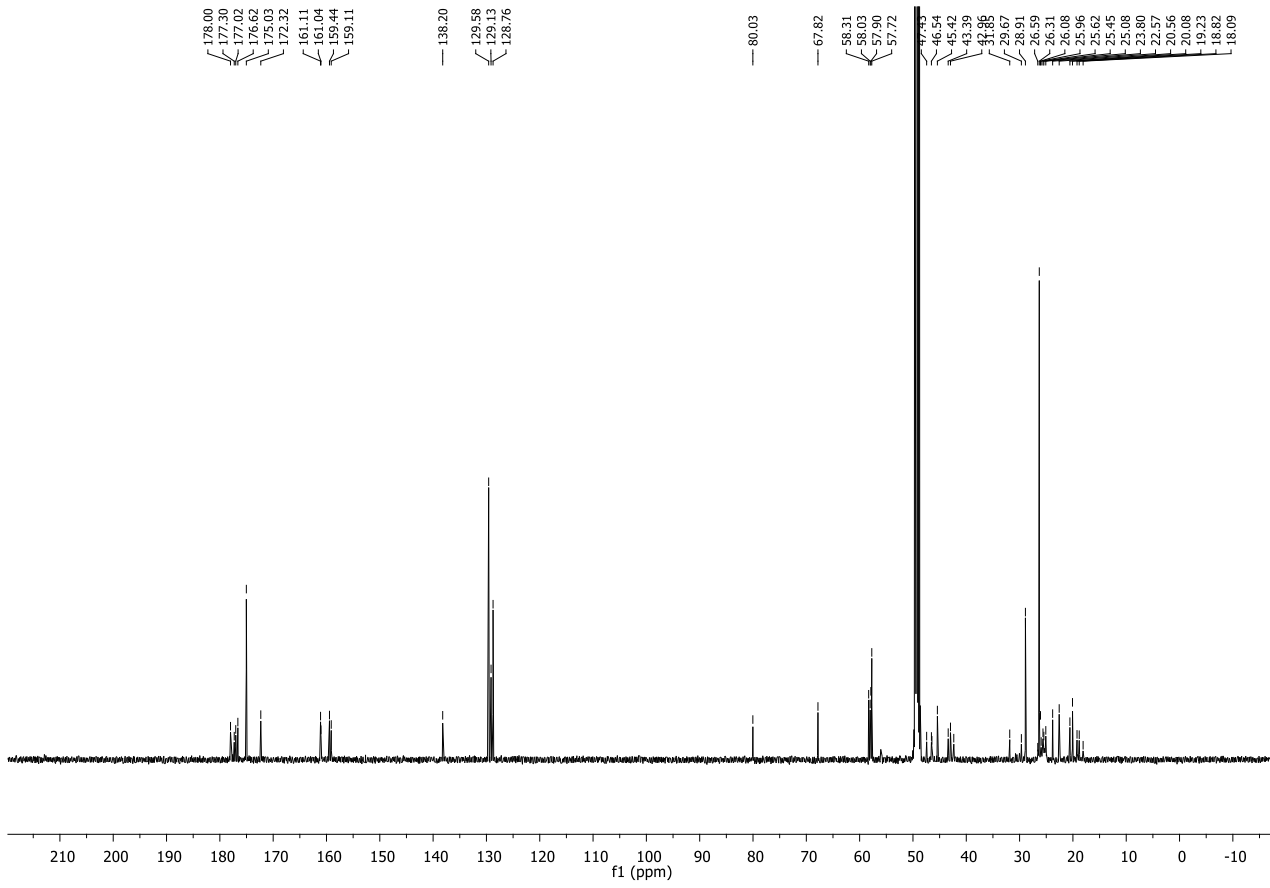

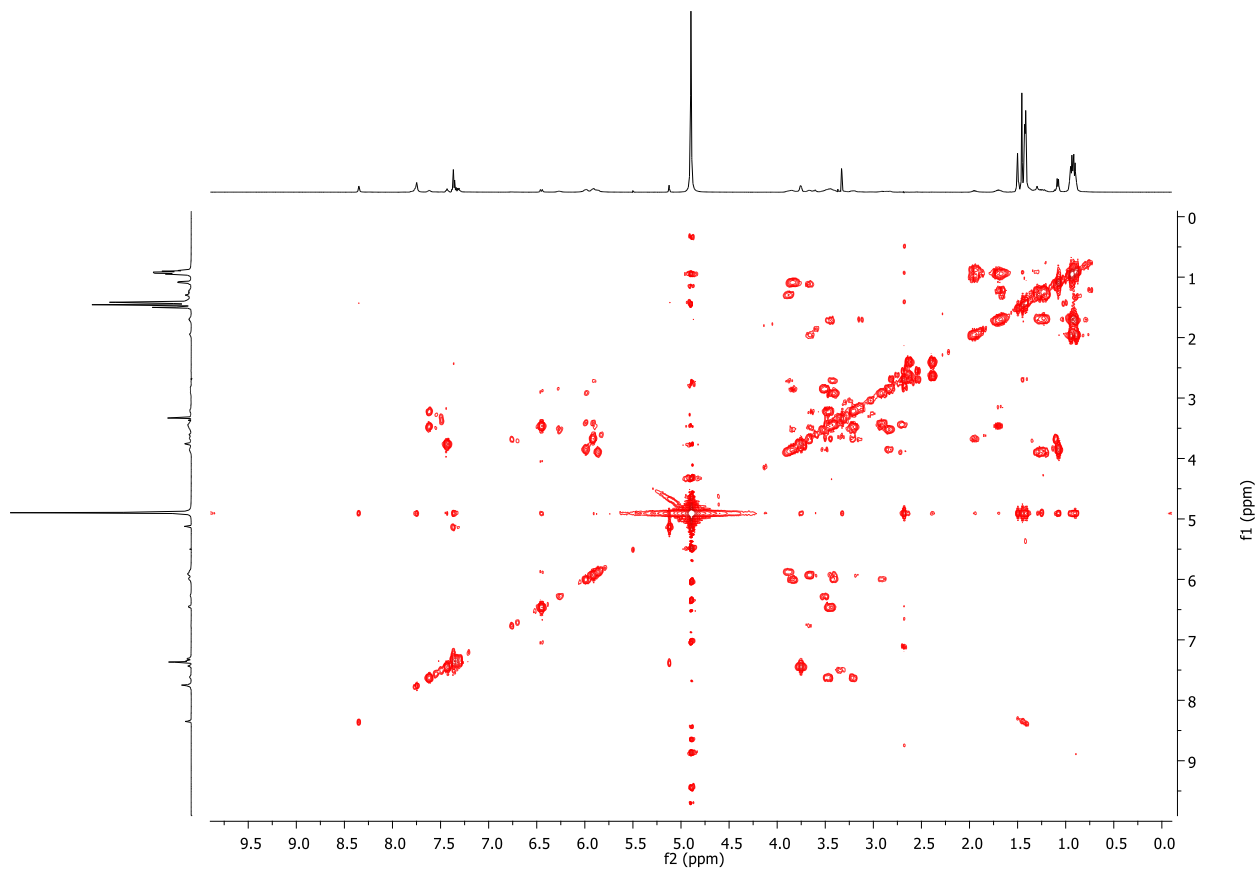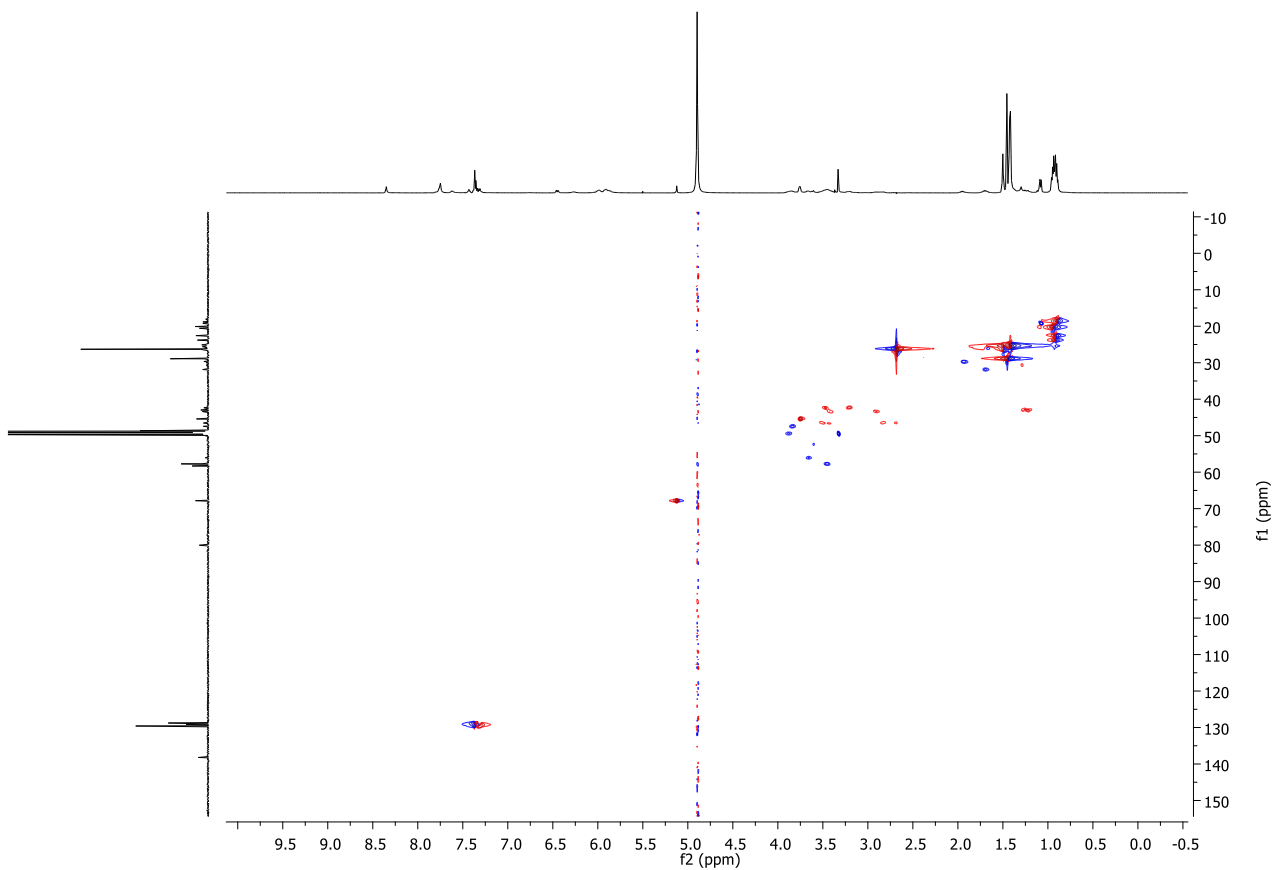

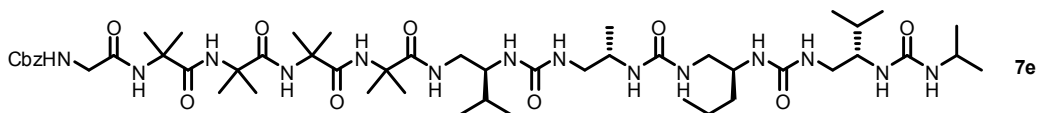

Chemical shift values (ppm) for <sup>1</sup>H NMR:

- 8.34
- 7.75, 7.73, 7.58, 7.57, 7.56, 7.40, 7.24
- 6.16, 6.07, 6.06, 6.02, 5.97, 5.97, 5.78, 5.69, 5.68
- 5.11
- 3.90, 3.78, 3.77, 3.74, 3.73, 3.69, 3.66, 3.64, 3.58, 3.52, 3.22, 2.99, 2.88, 2.87, 2.77, 2.76, 2.65, 1.96, 1.95, 1.93, 1.92, 1.91, 1.89, 1.77, 1.59, 1.49, 1.48, 1.33, 1.34, 1.14, 1.11, 1.10, 1.07, 1.06, 0.97, 0.88

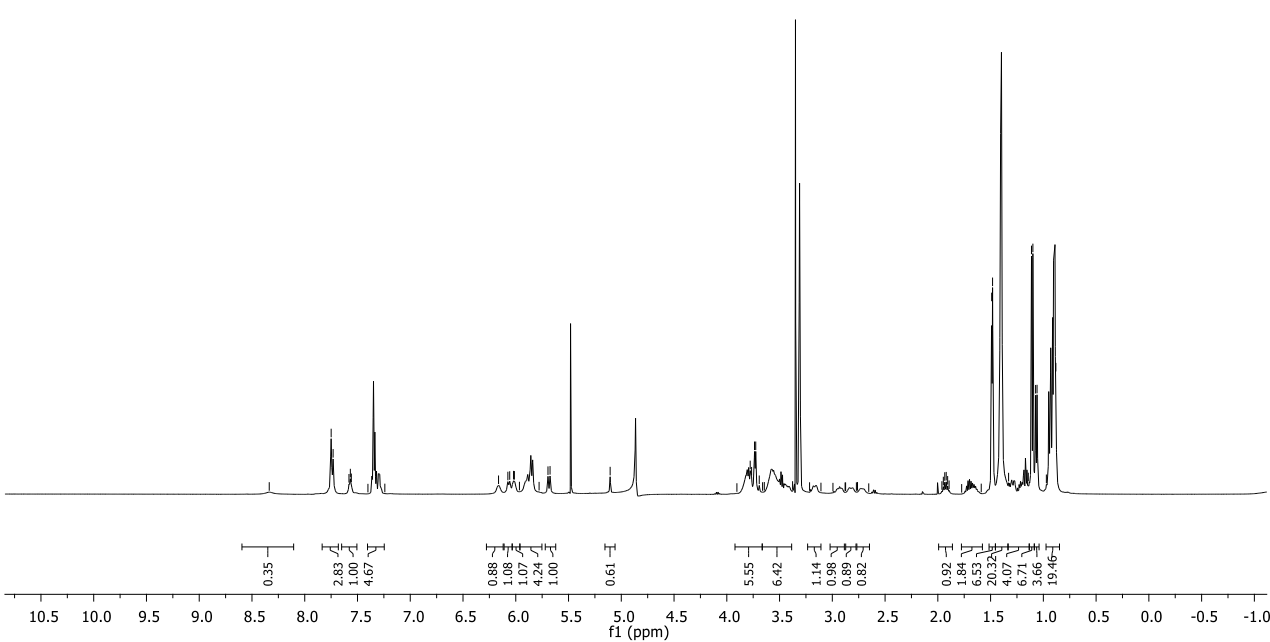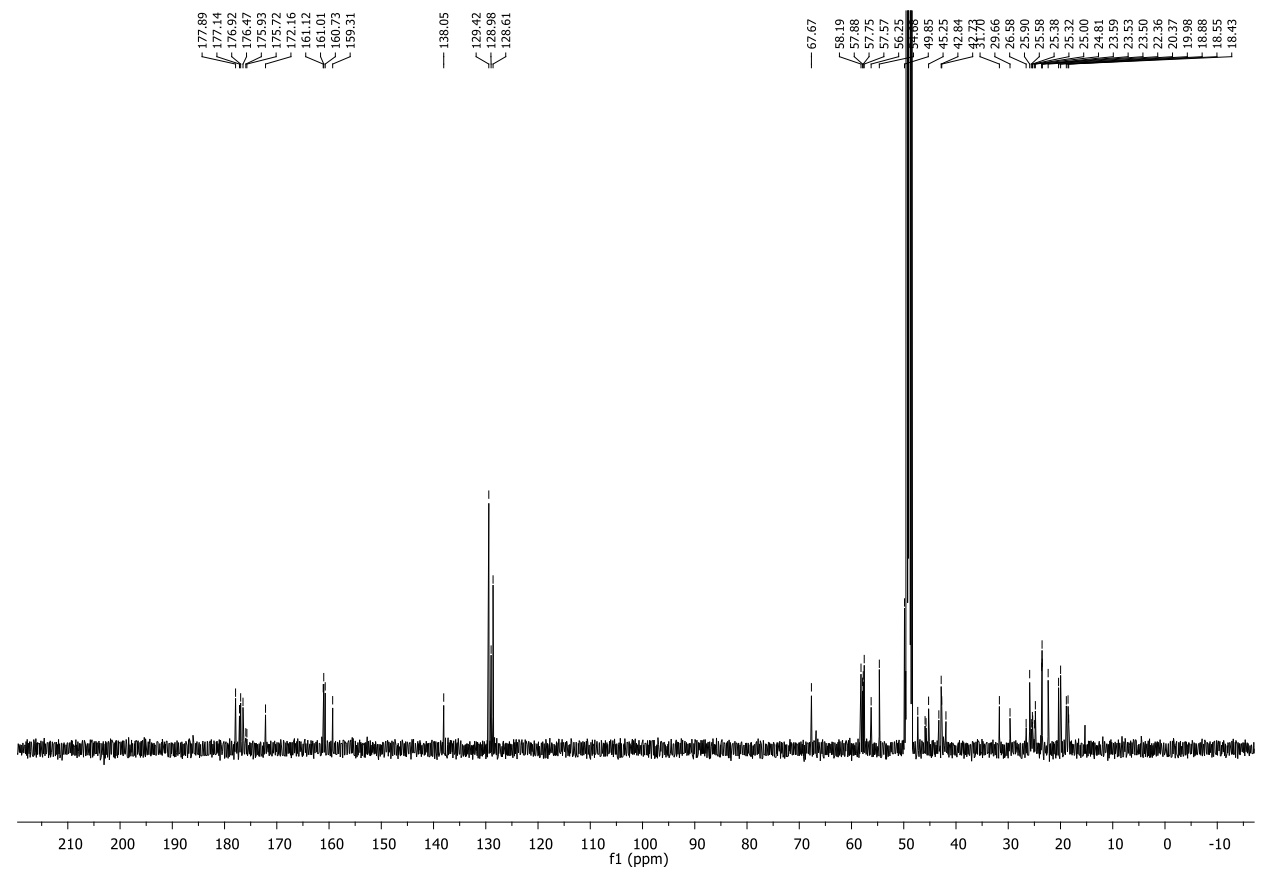

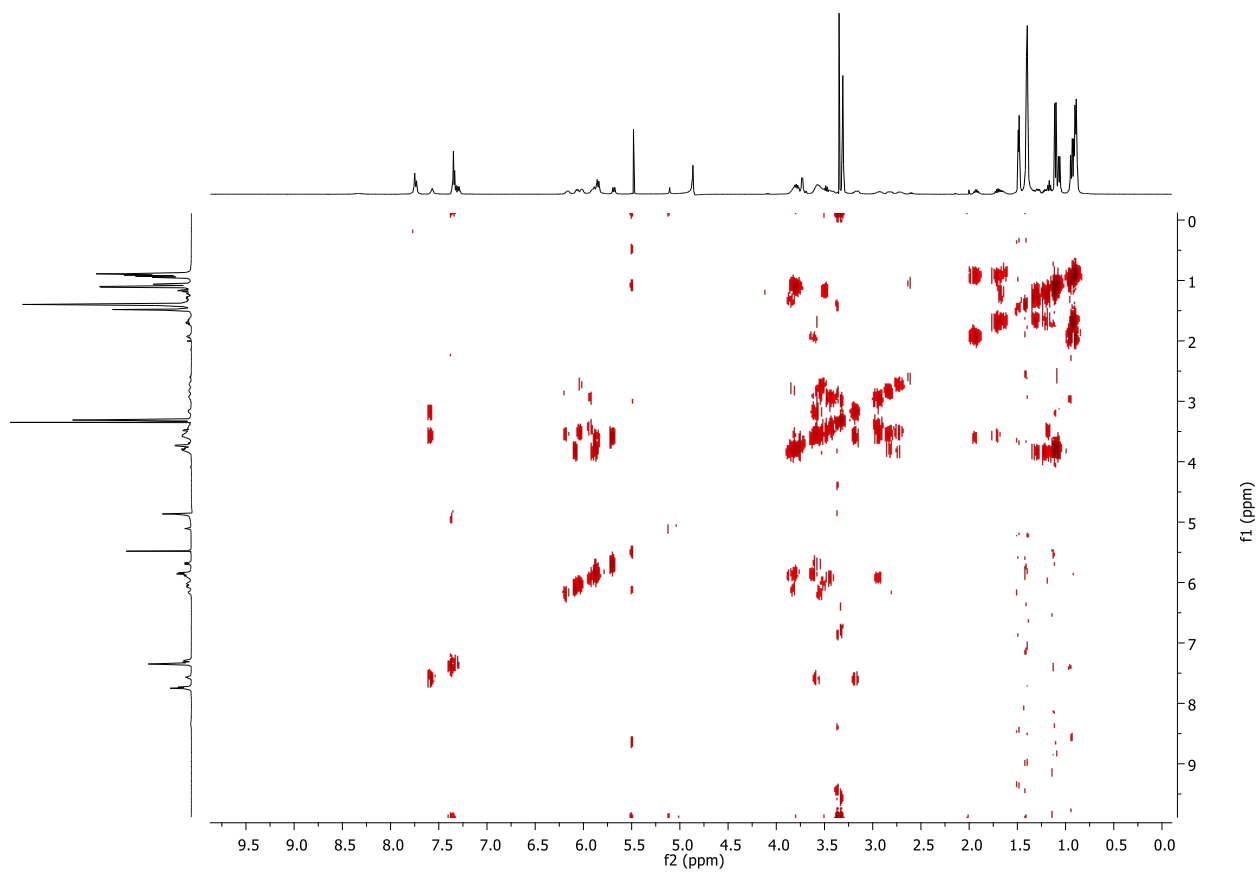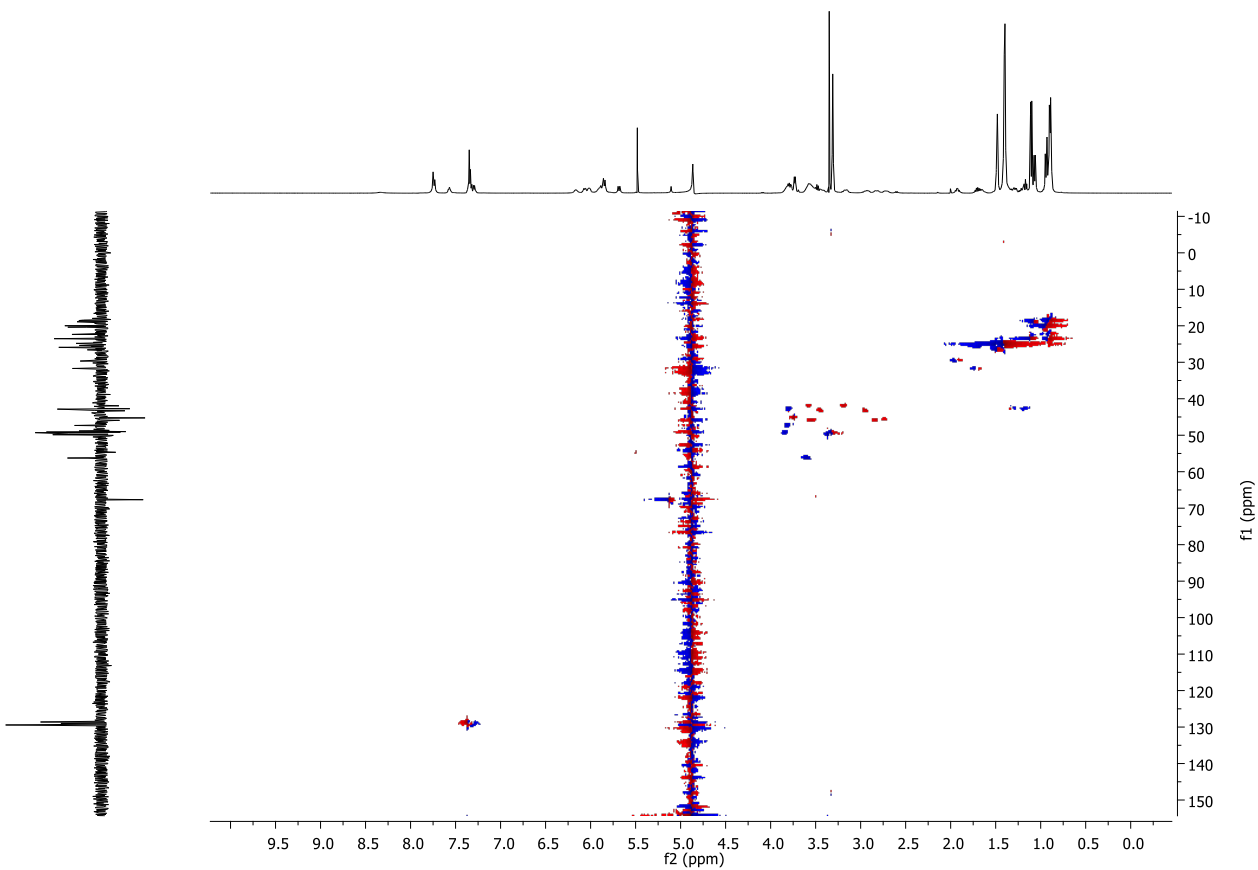

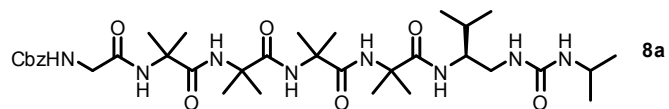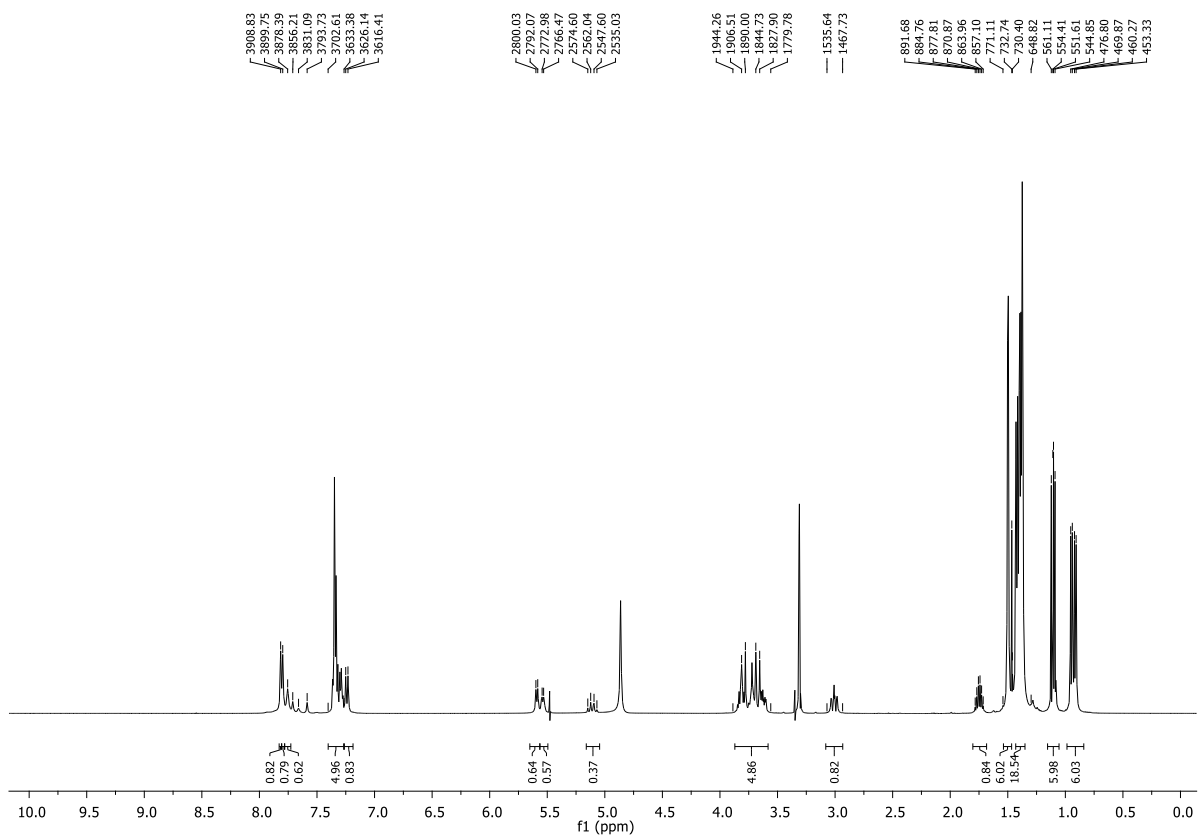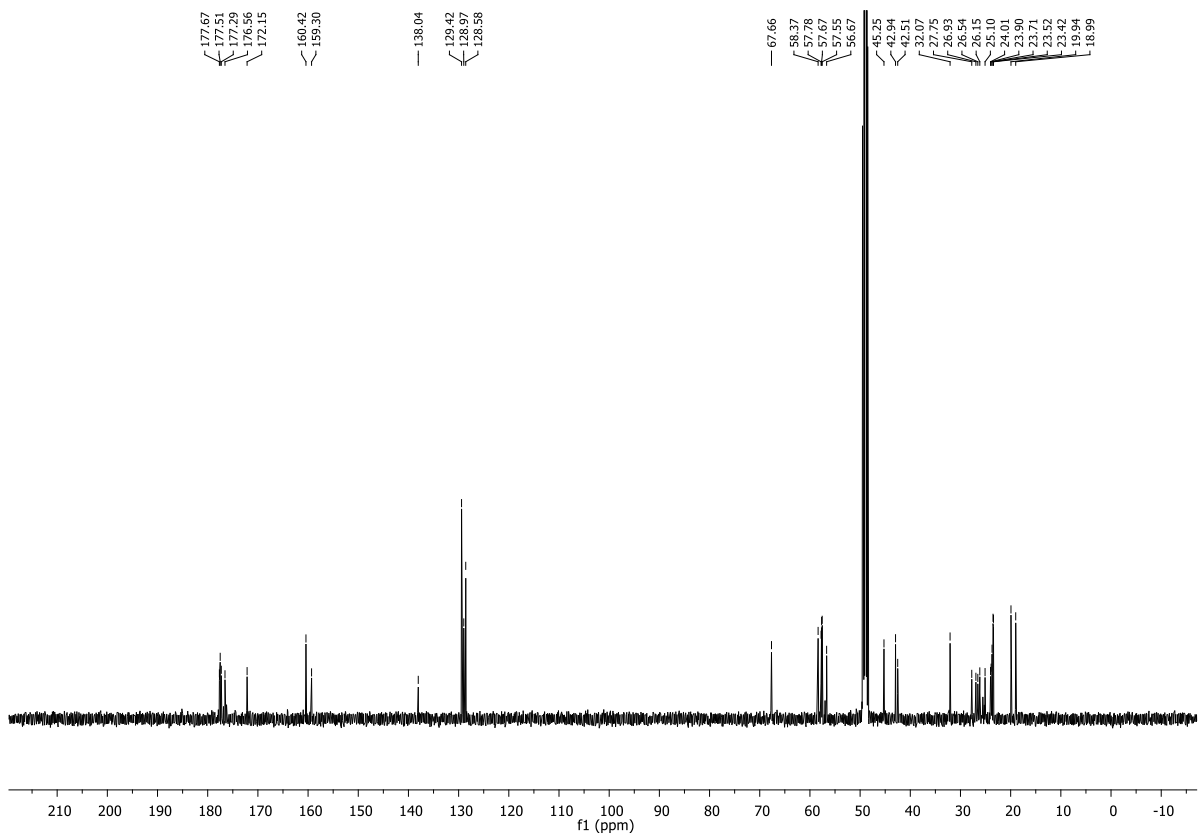

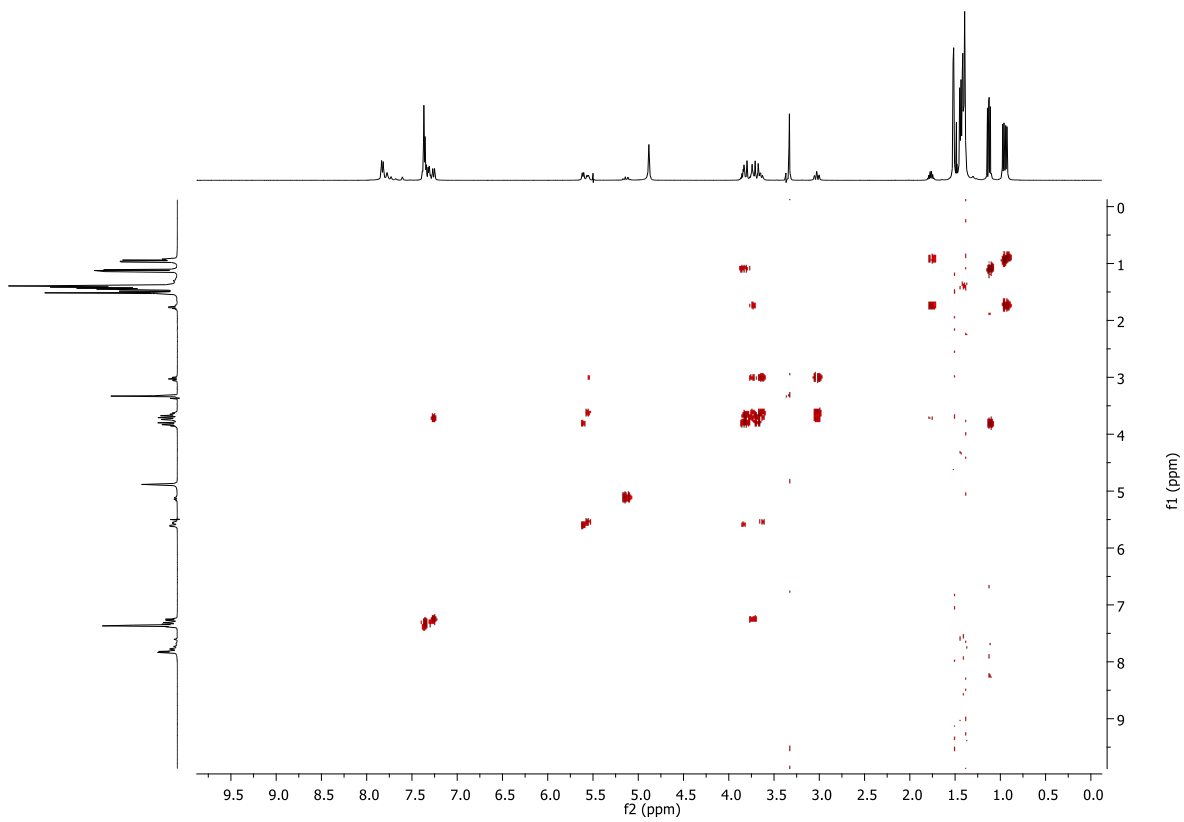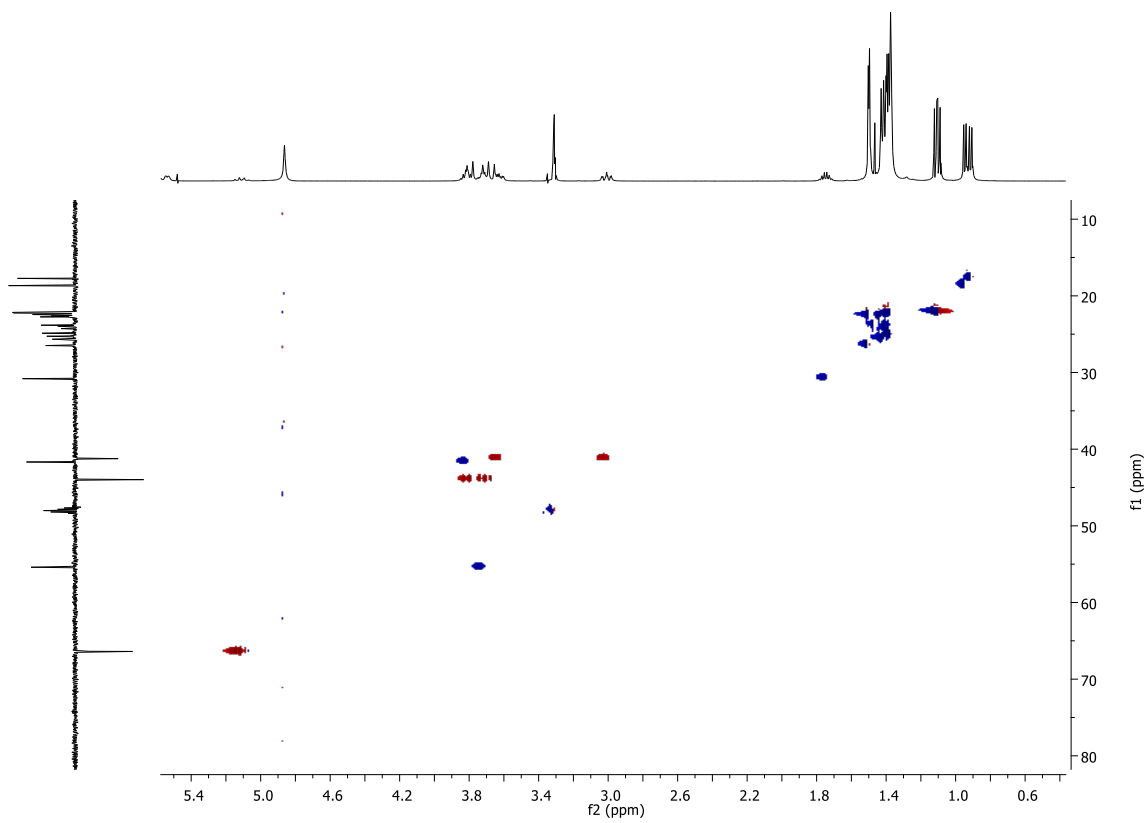

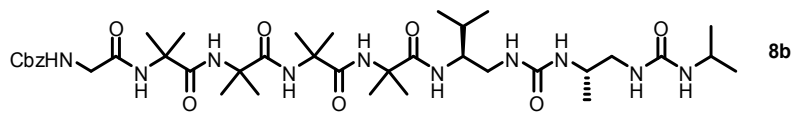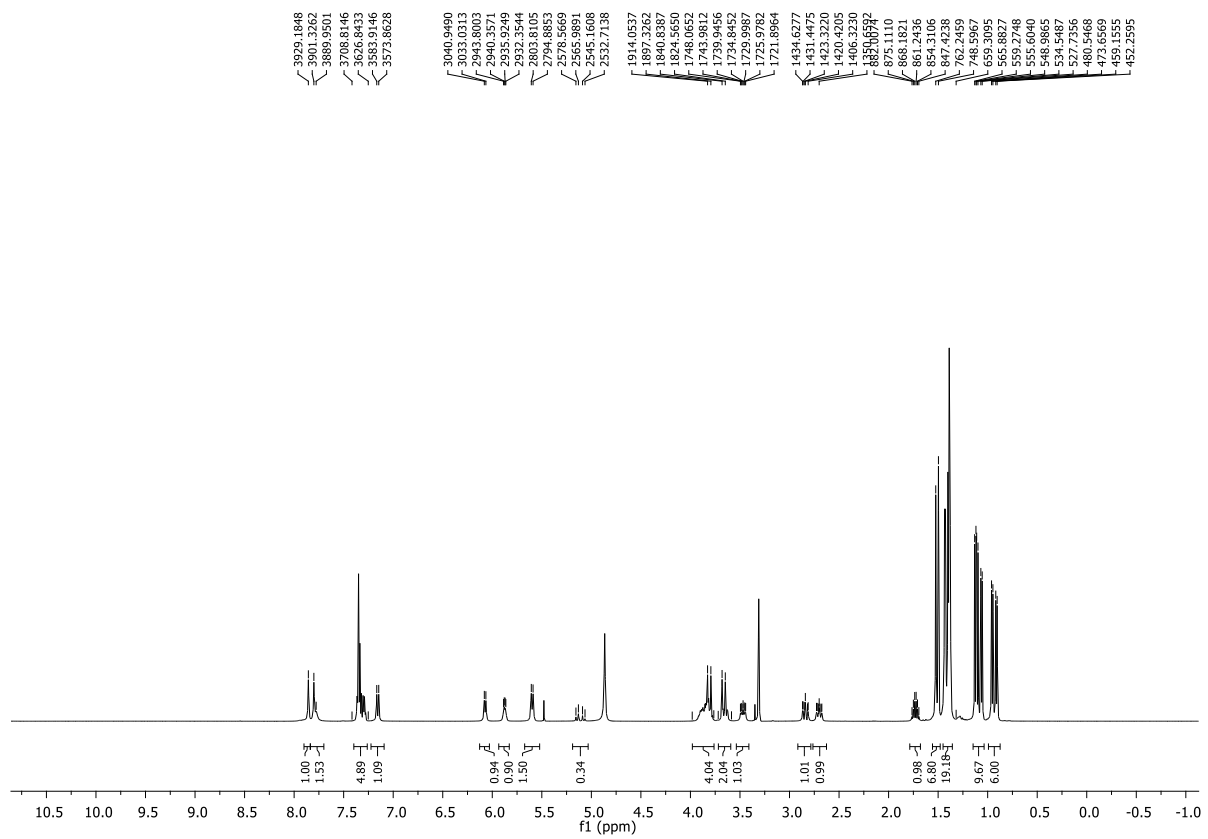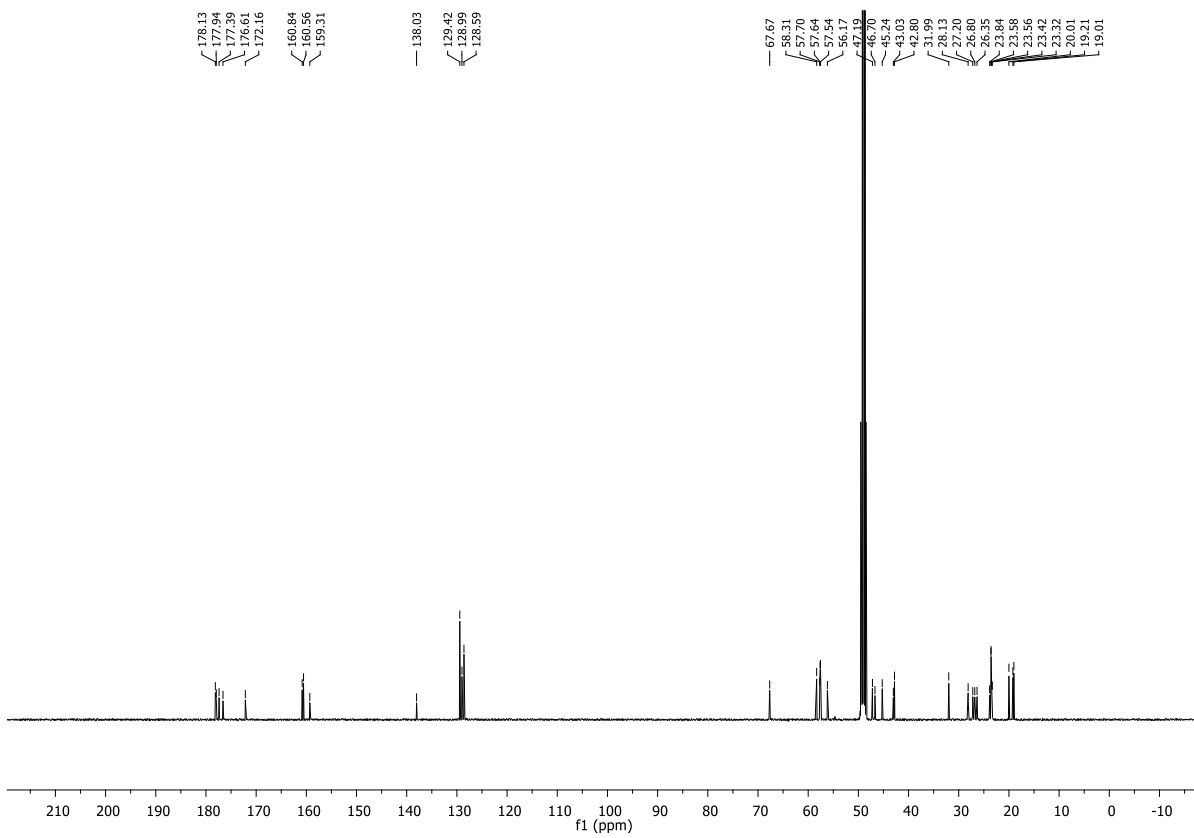



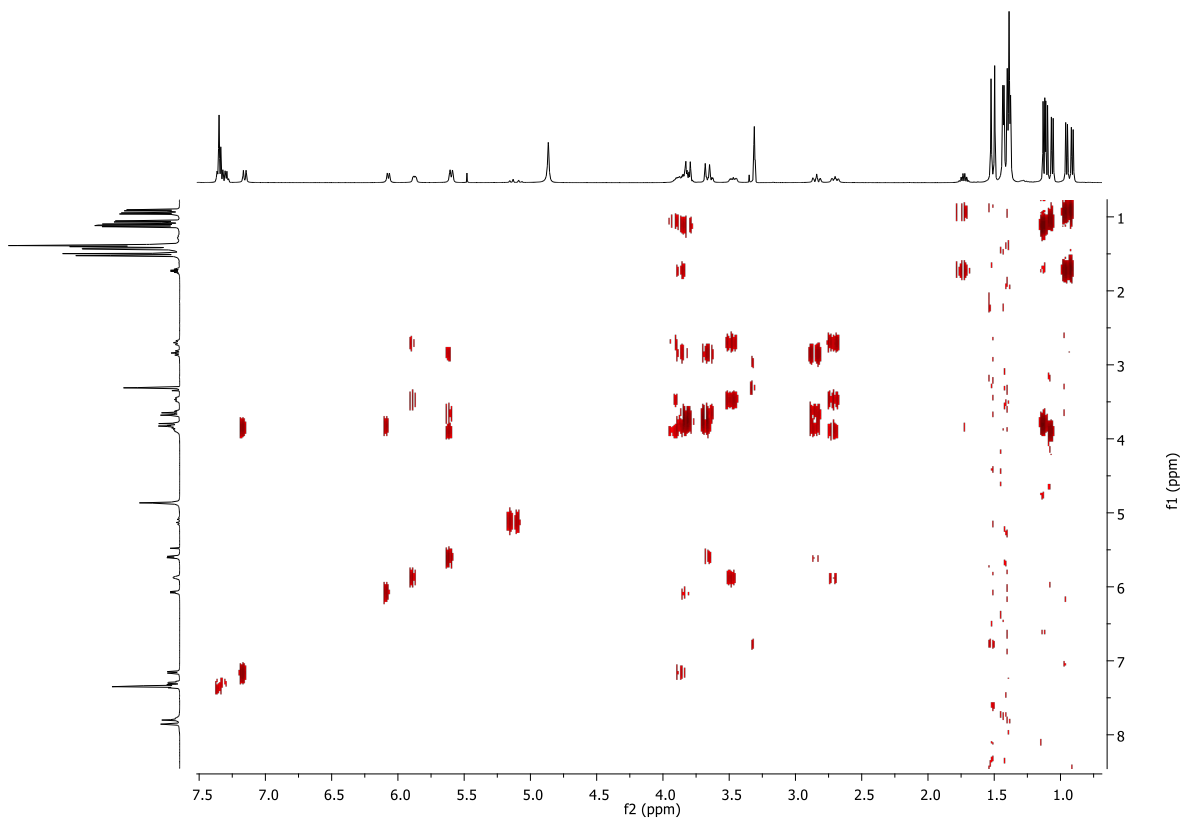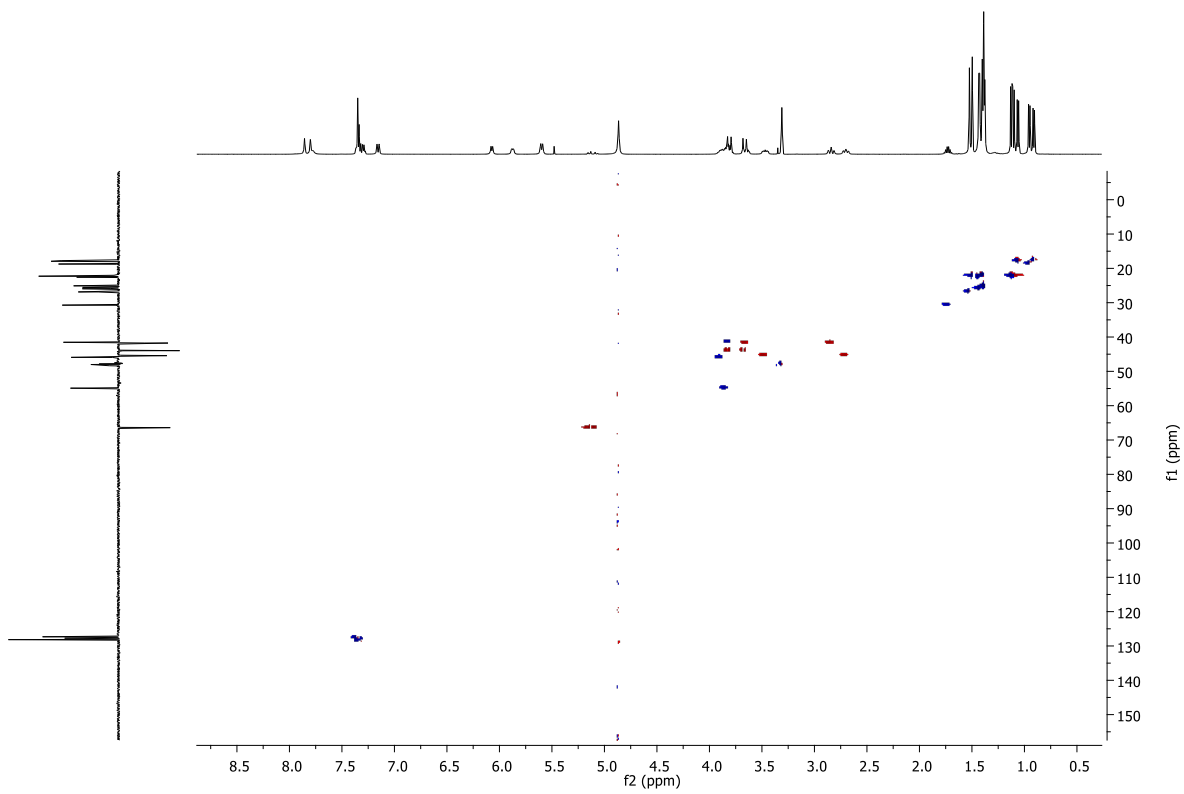

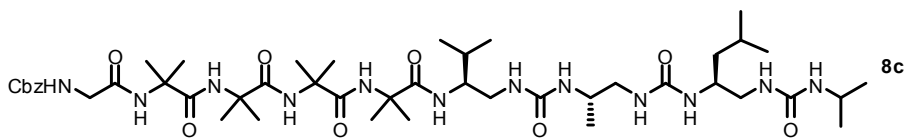

3912.22  
3901.94  
3778.73  
3627.11  
3562.21  
3572.13  
  
3157.74  
3149.52  
3109.67  
3101.82  
3027.21  
3017.96  
2990.35  
2991.57  
2971.57  
2967.64  
2865.50  
2862.58  
2856.41  
2853.30  
2728.88  
2718.68  
1918.65  
1822.32  
1823.05  
1823.05  
1815.91  
1802.59  
1779.45  
1776.30  
1770.02  
1765.88  
  
1417.48  
1414.05  
1402.71  
1332.18  
1320.66  
1308.32  
889.93  
806.90  
768.78  
752.57  
719.26  
719.26  
698.13  
653.27  
653.27  
580.86  
559.90  
558.55  
553.34  
551.96  
526.92  
520.05  
483.17  
411.12

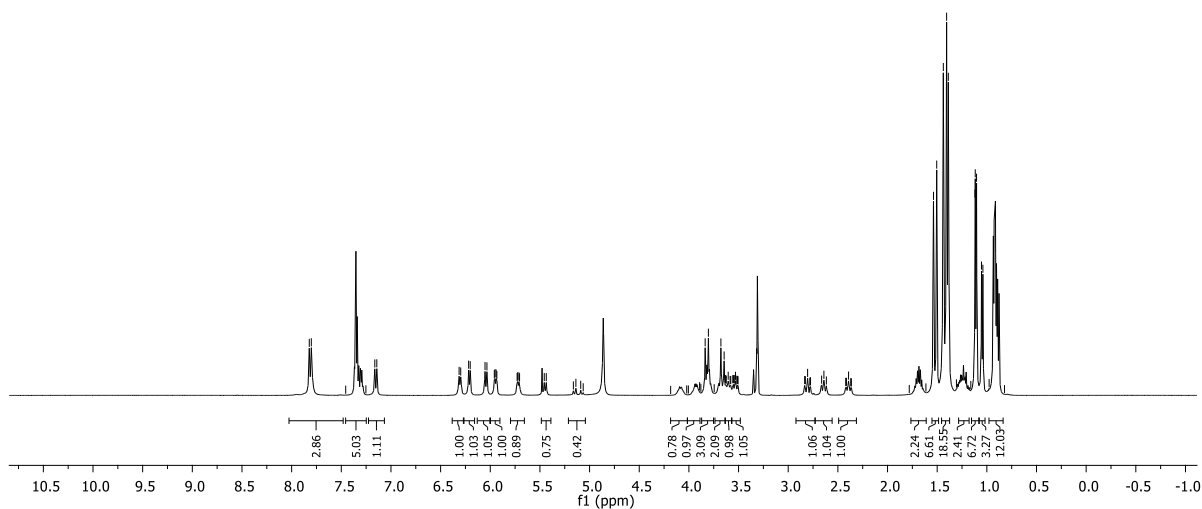

178.50  
177.95  
177.55  
176.63  
172.16  
161.14  
159.59  
159.31  
  
138.02  
128.43  
128.00  
128.60  
  
67.68  
58.20  
57.66  
57.59  
57.53  
46.12  
43.97  
42.21  
38.25  
35.93  
36.47  
25.84  
23.77  
23.64  
23.56  
23.54  
23.26  
23.16  
22.98  
22.49  
20.06  
19.11  
18.71

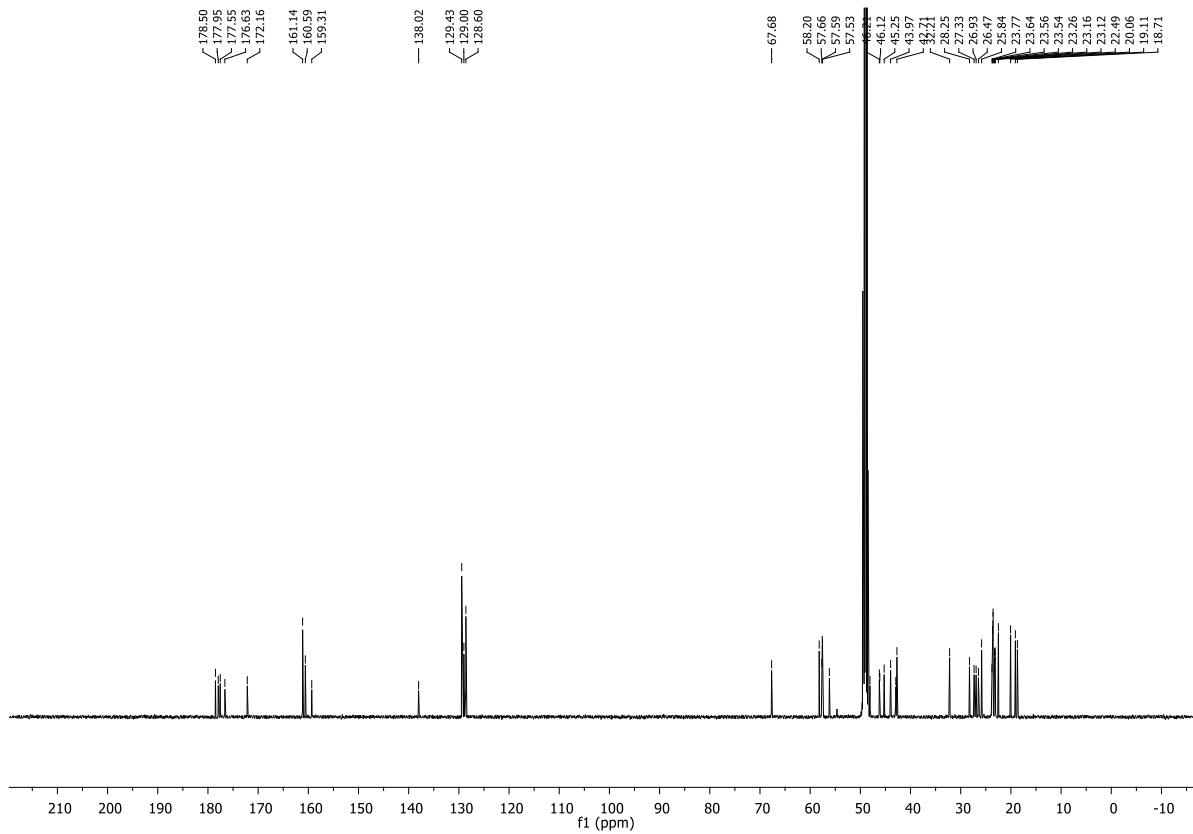

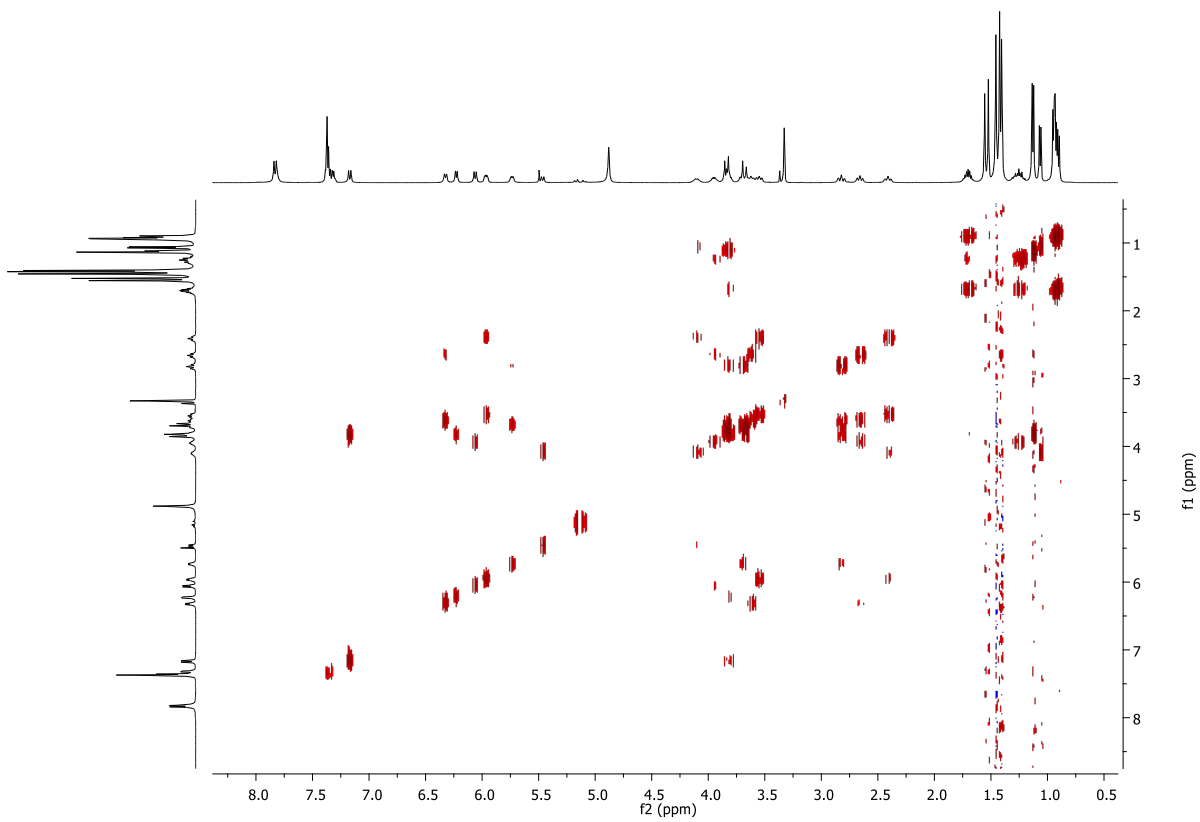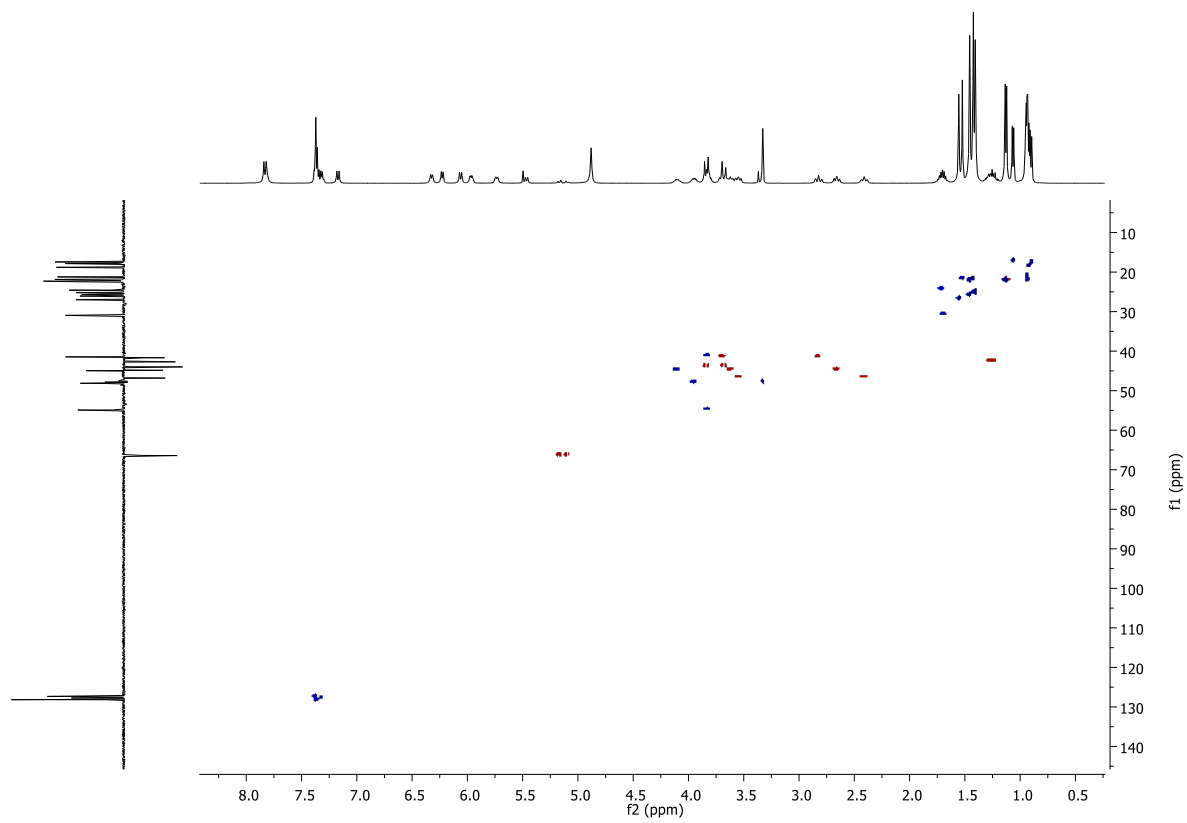

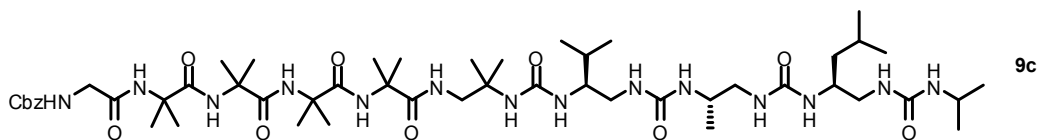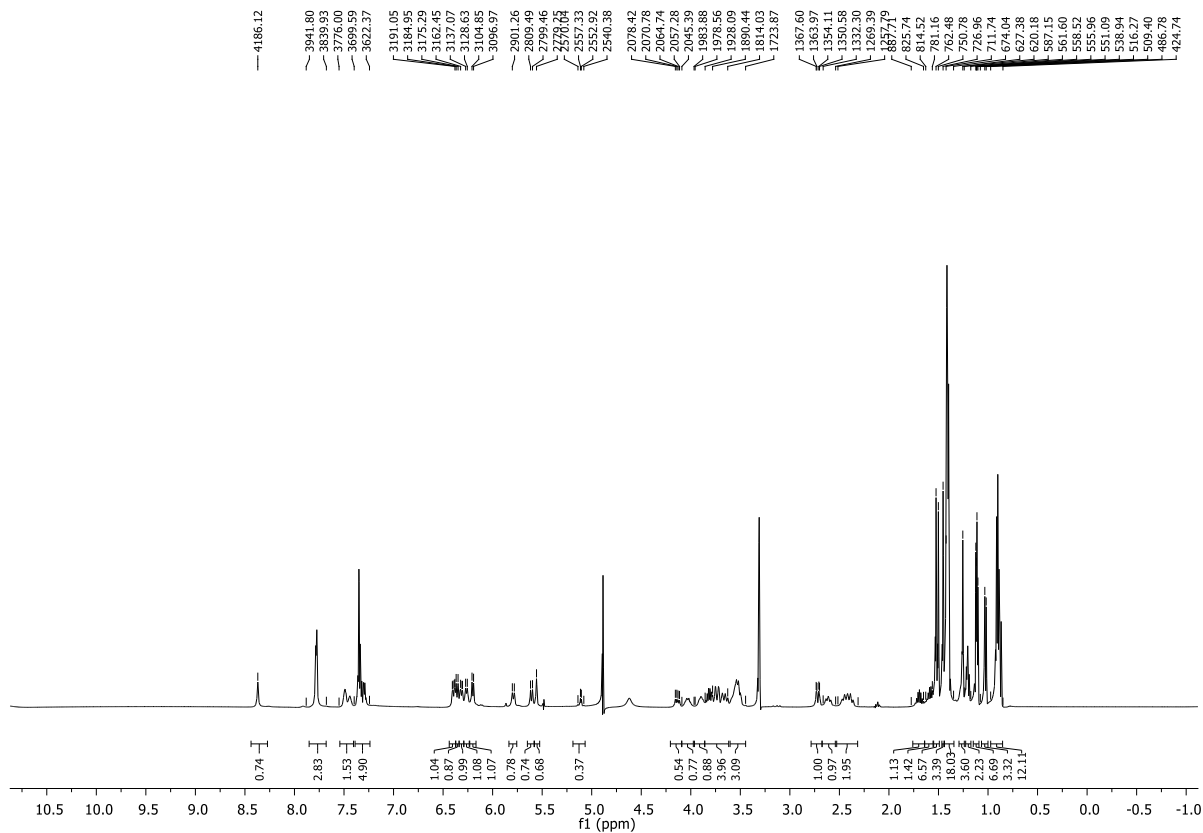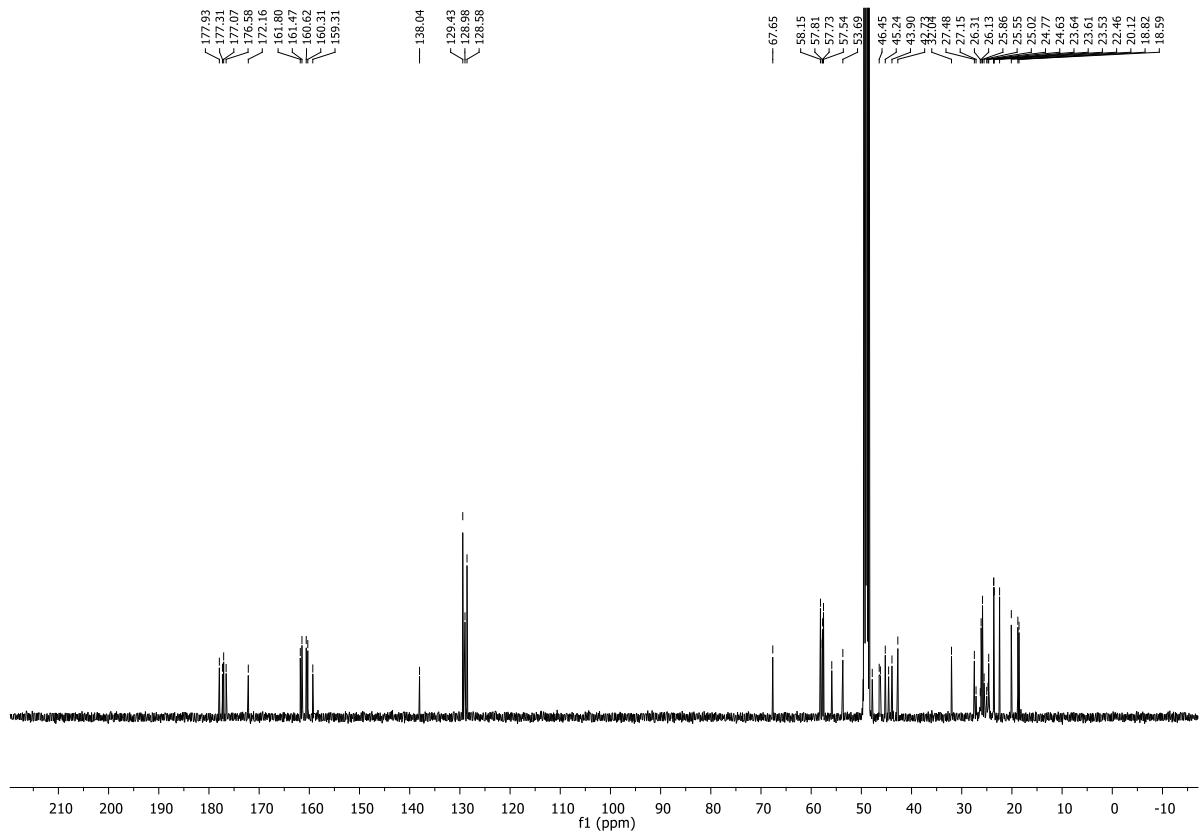

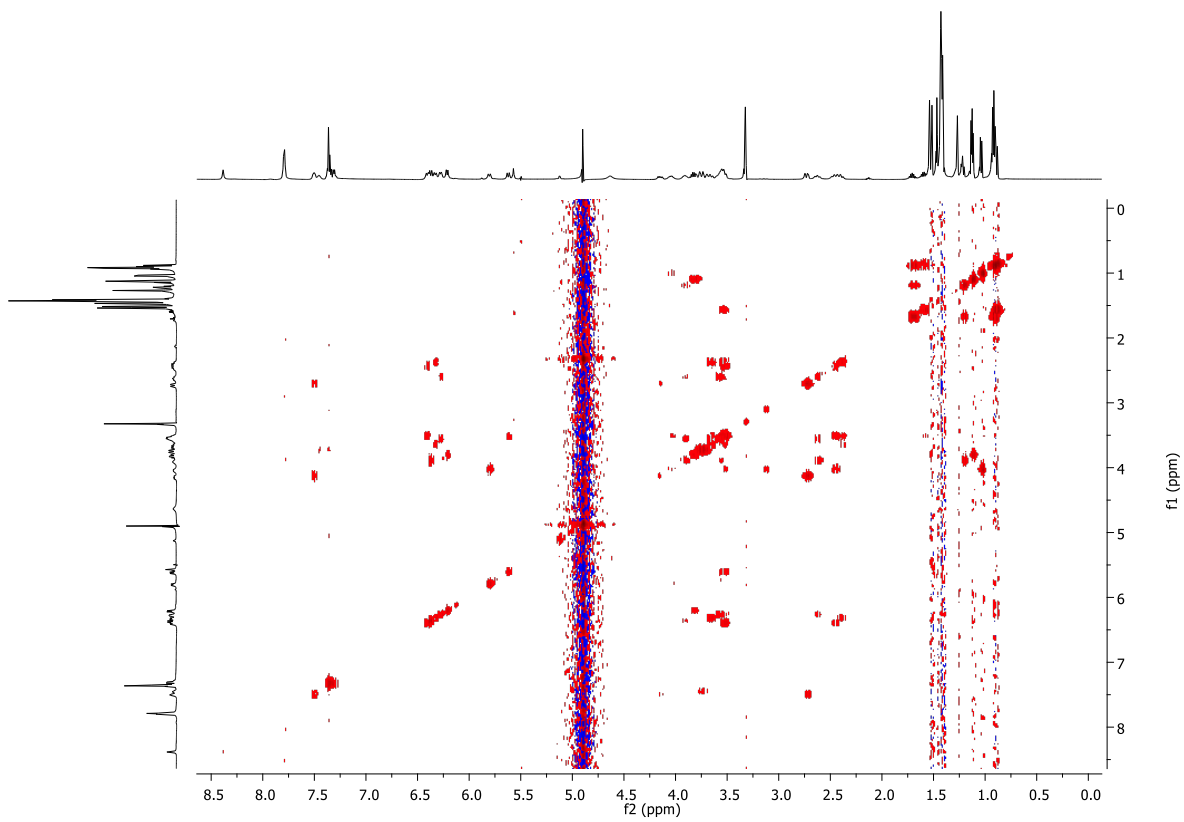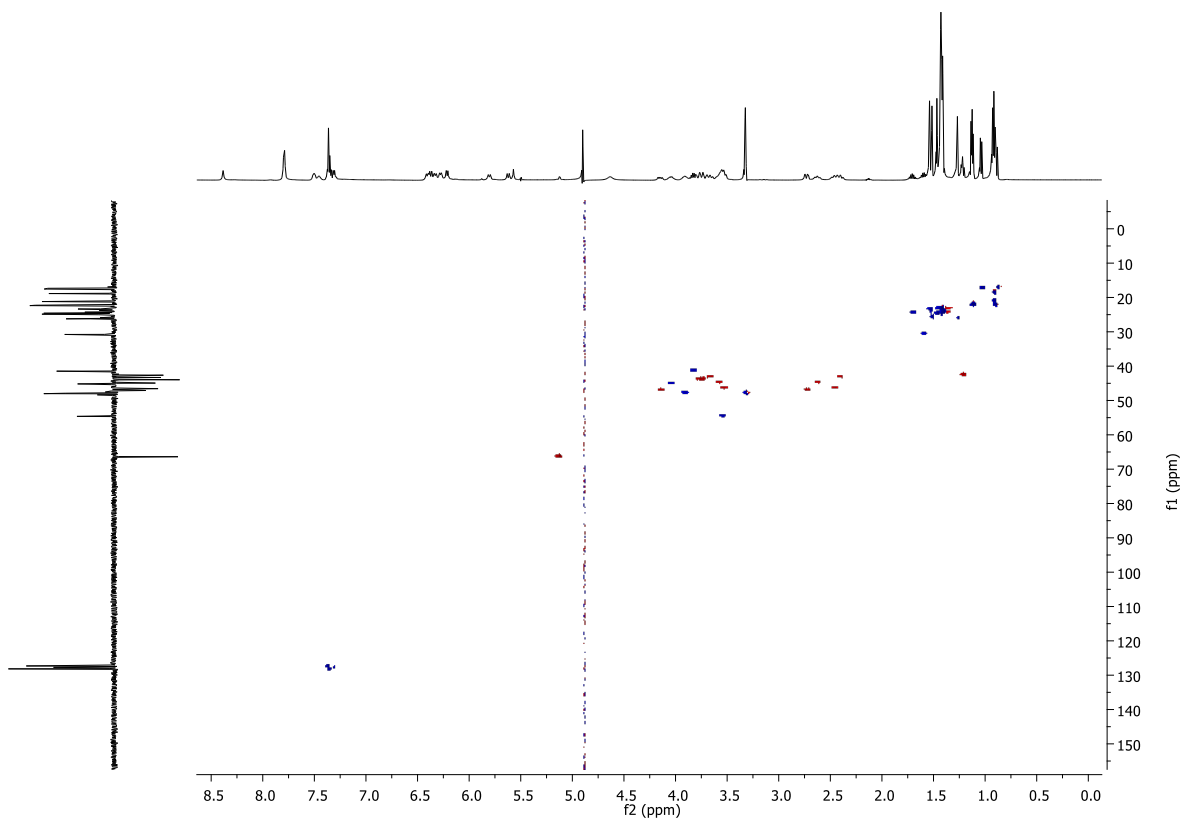

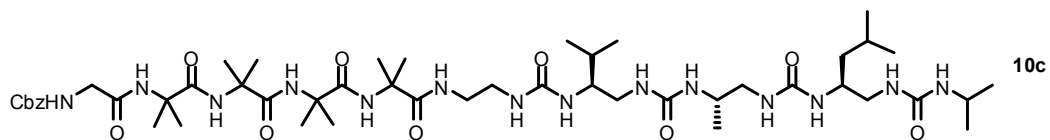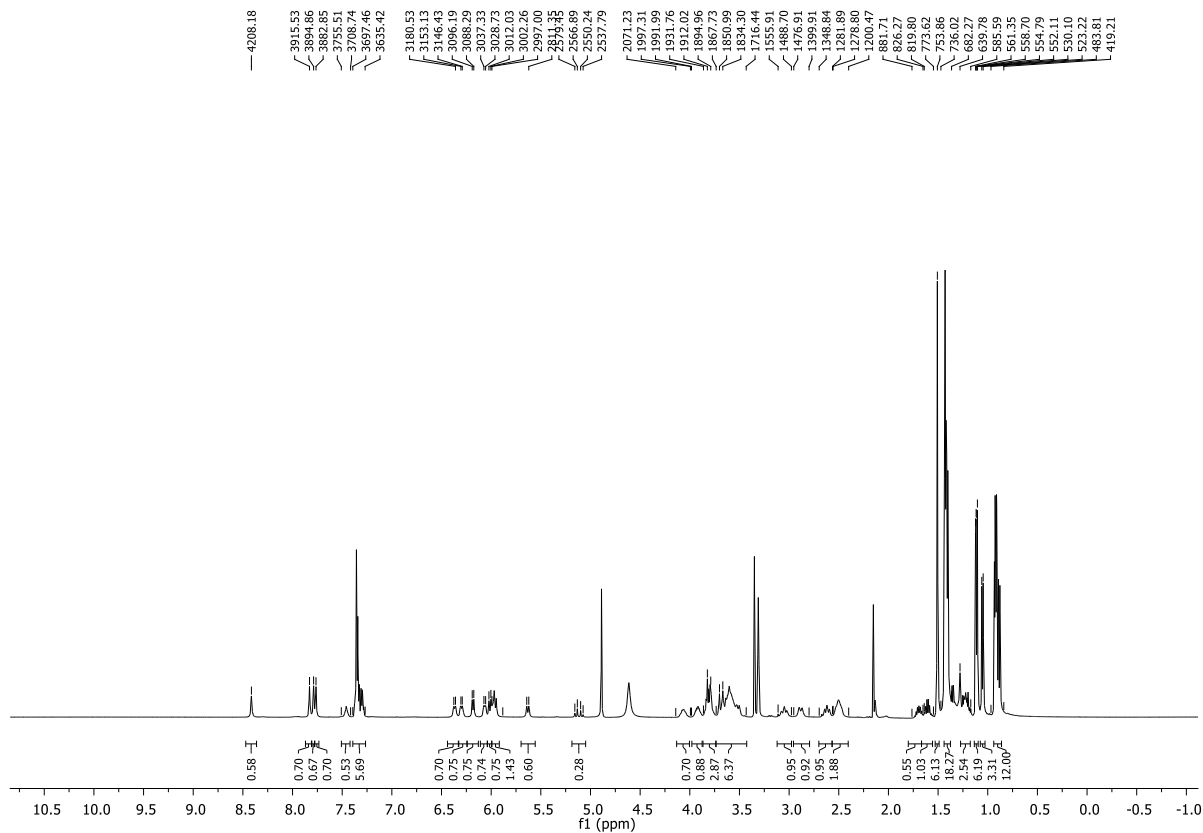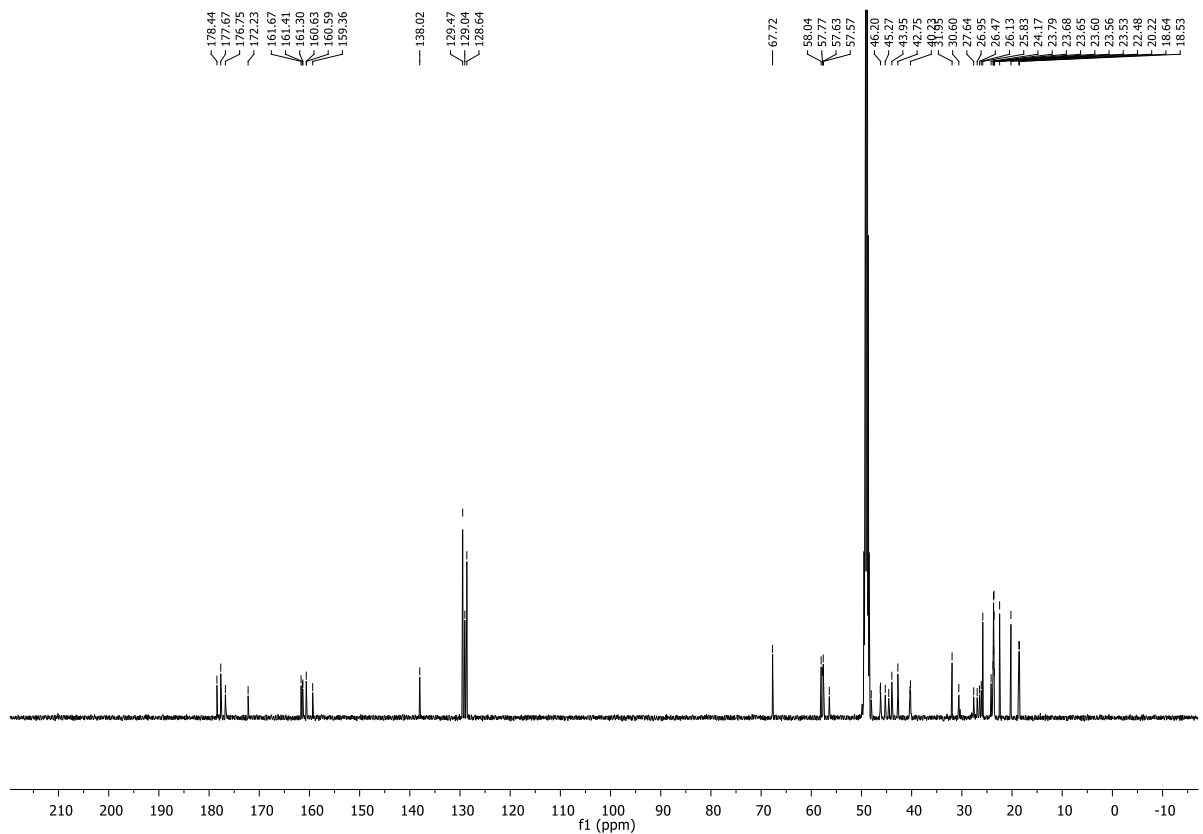

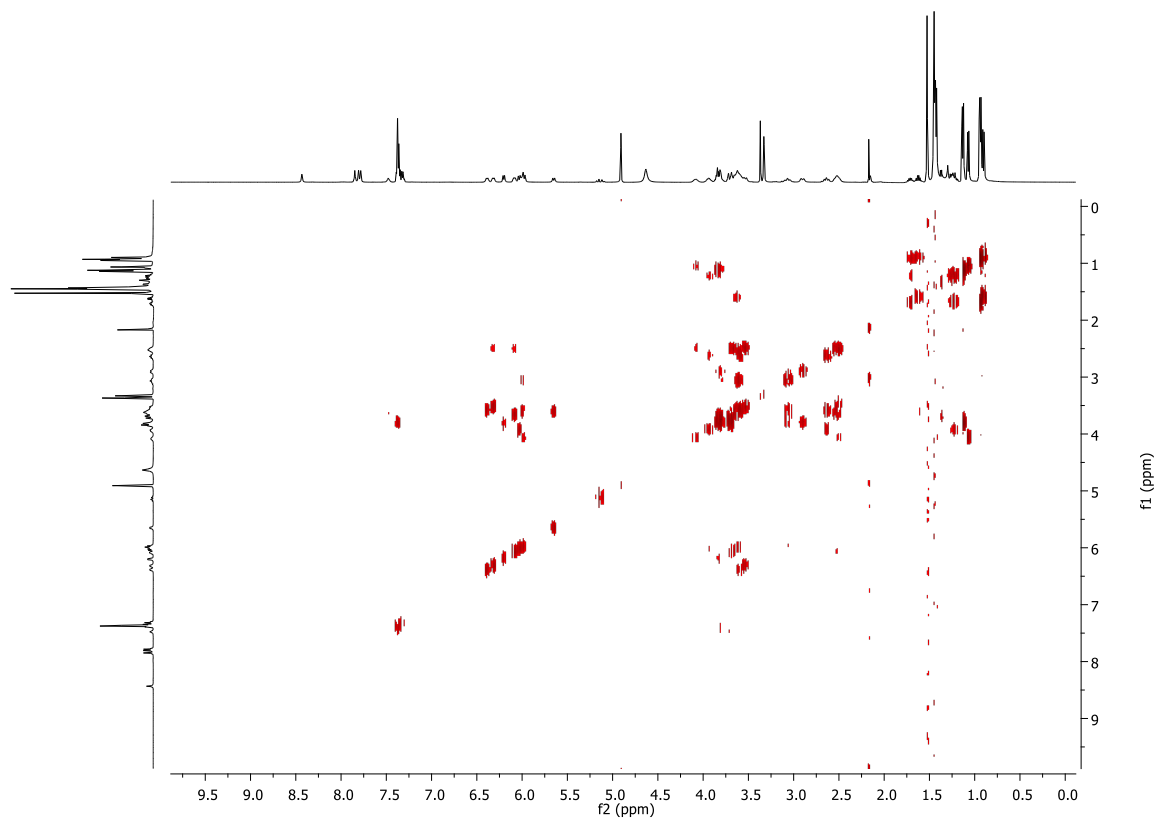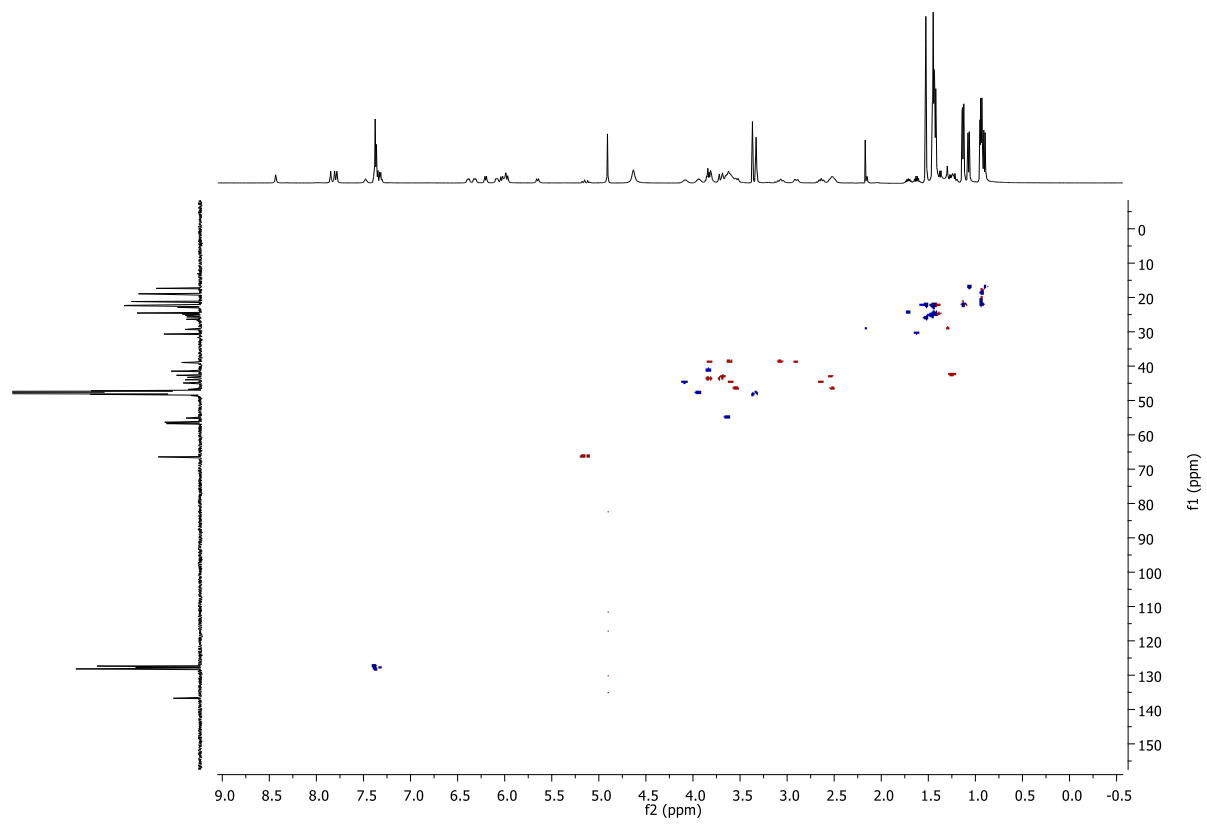

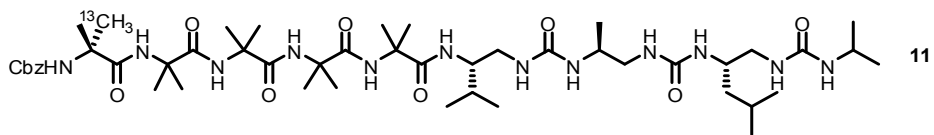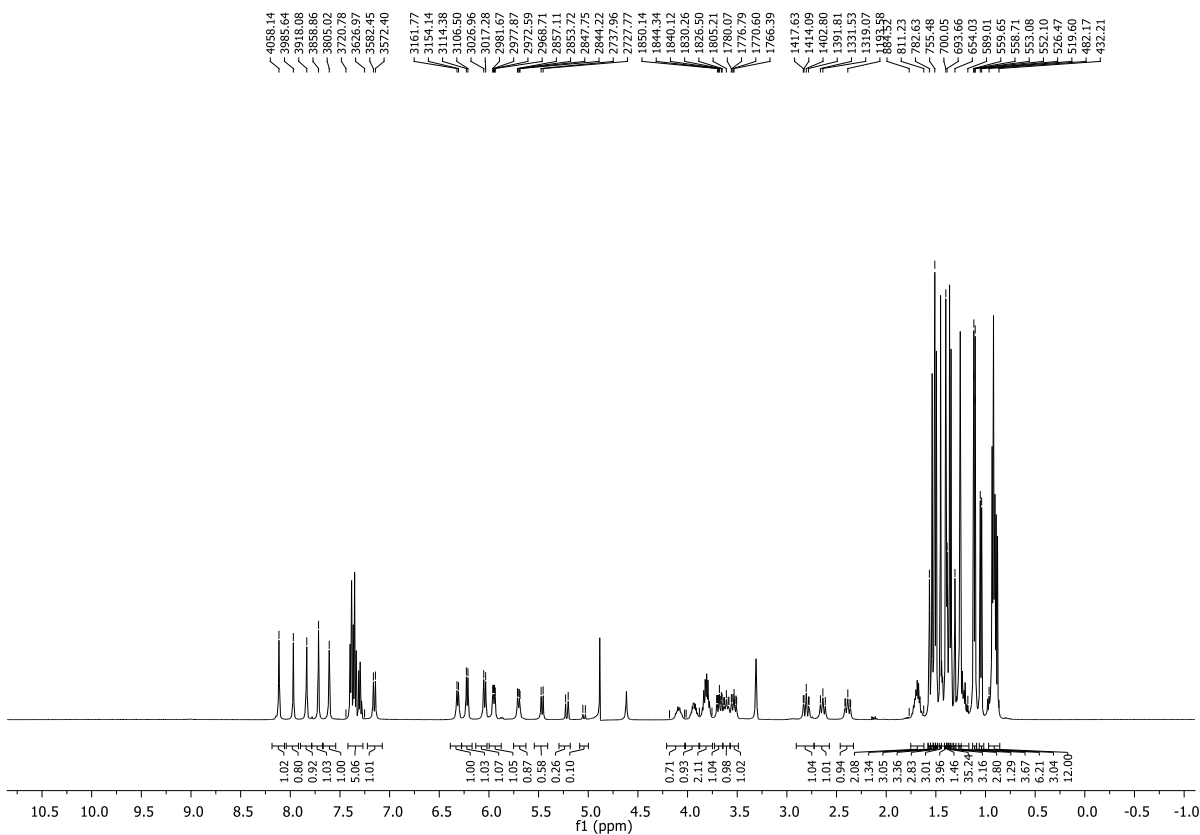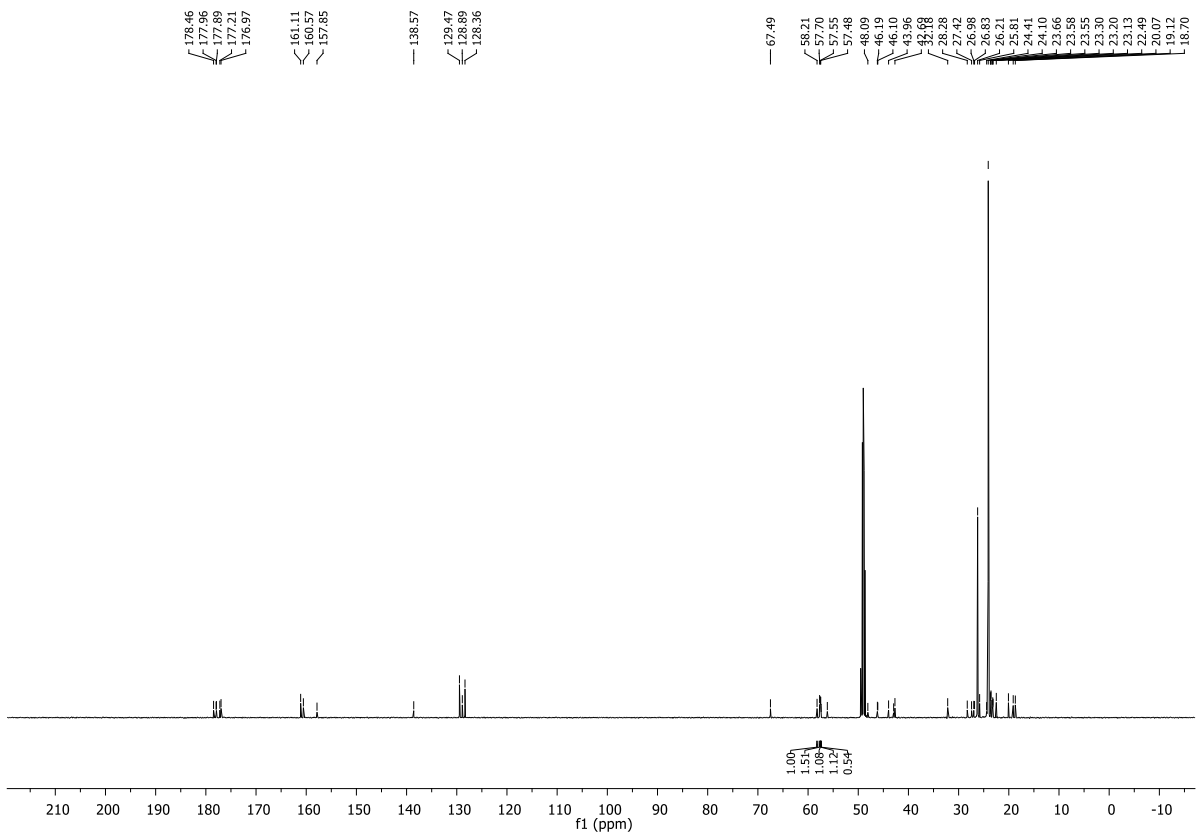



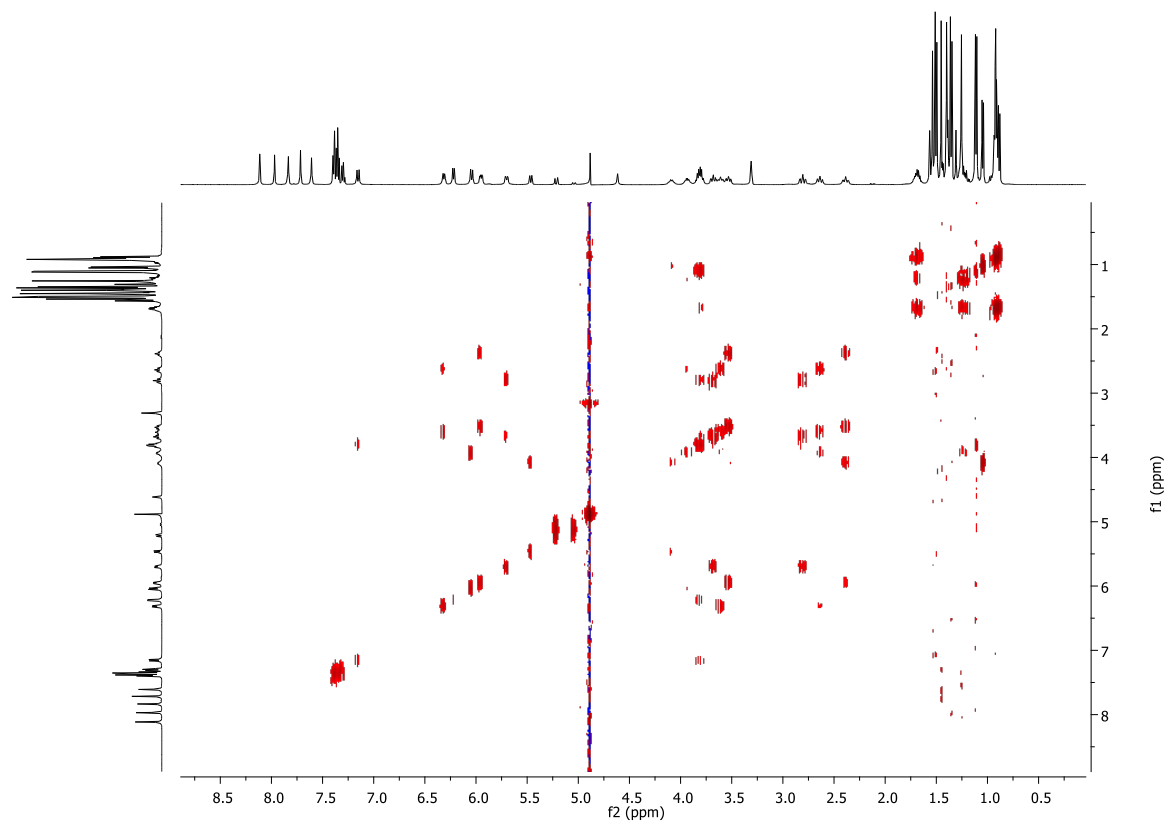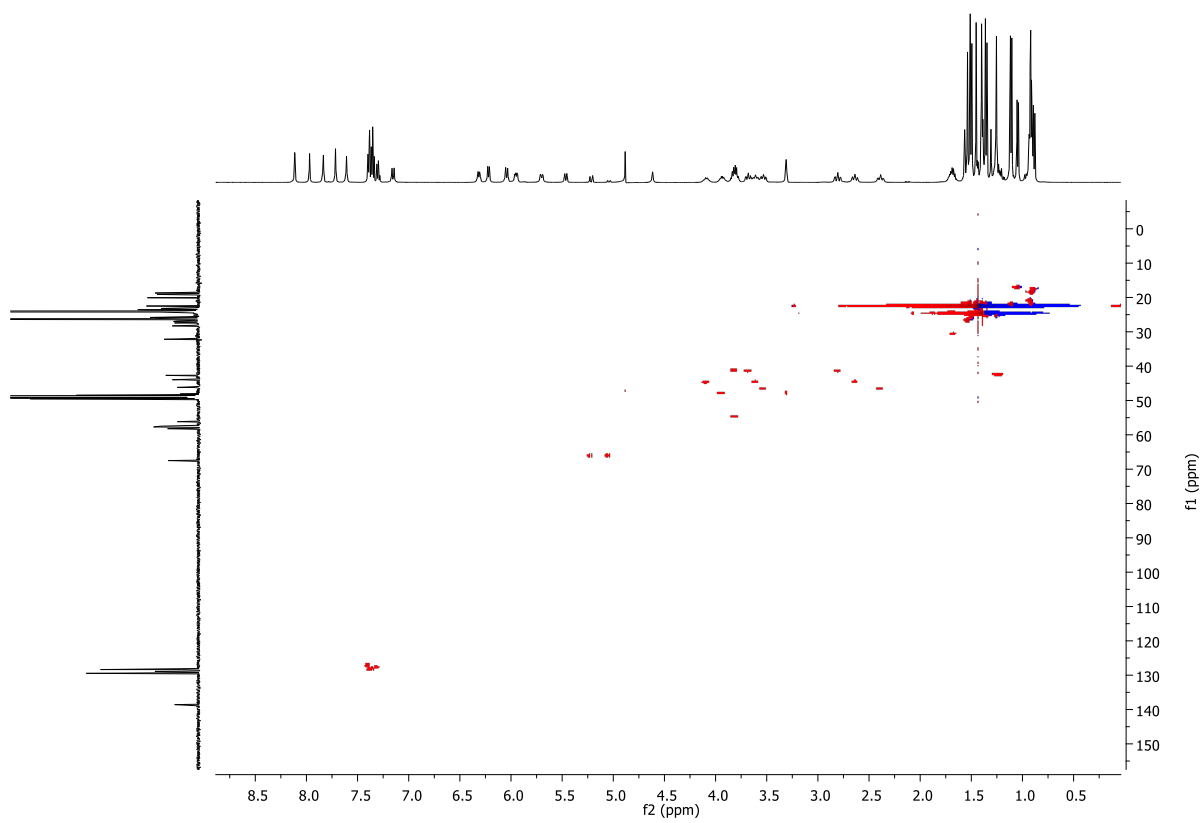

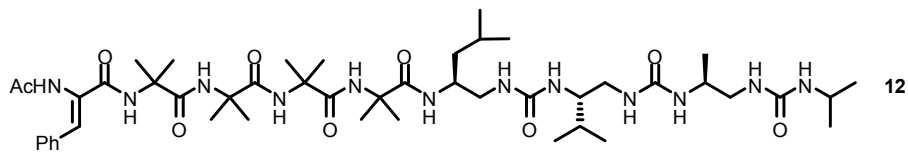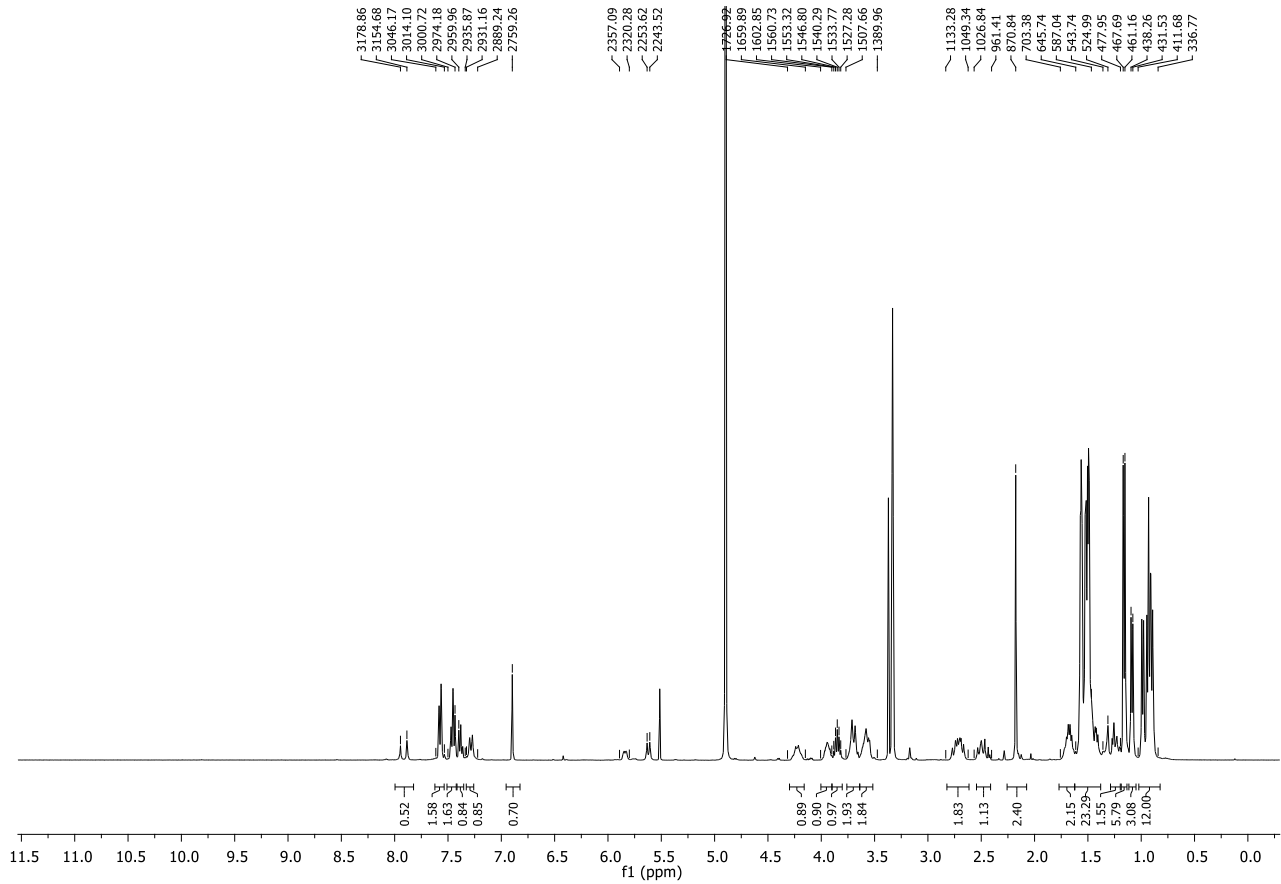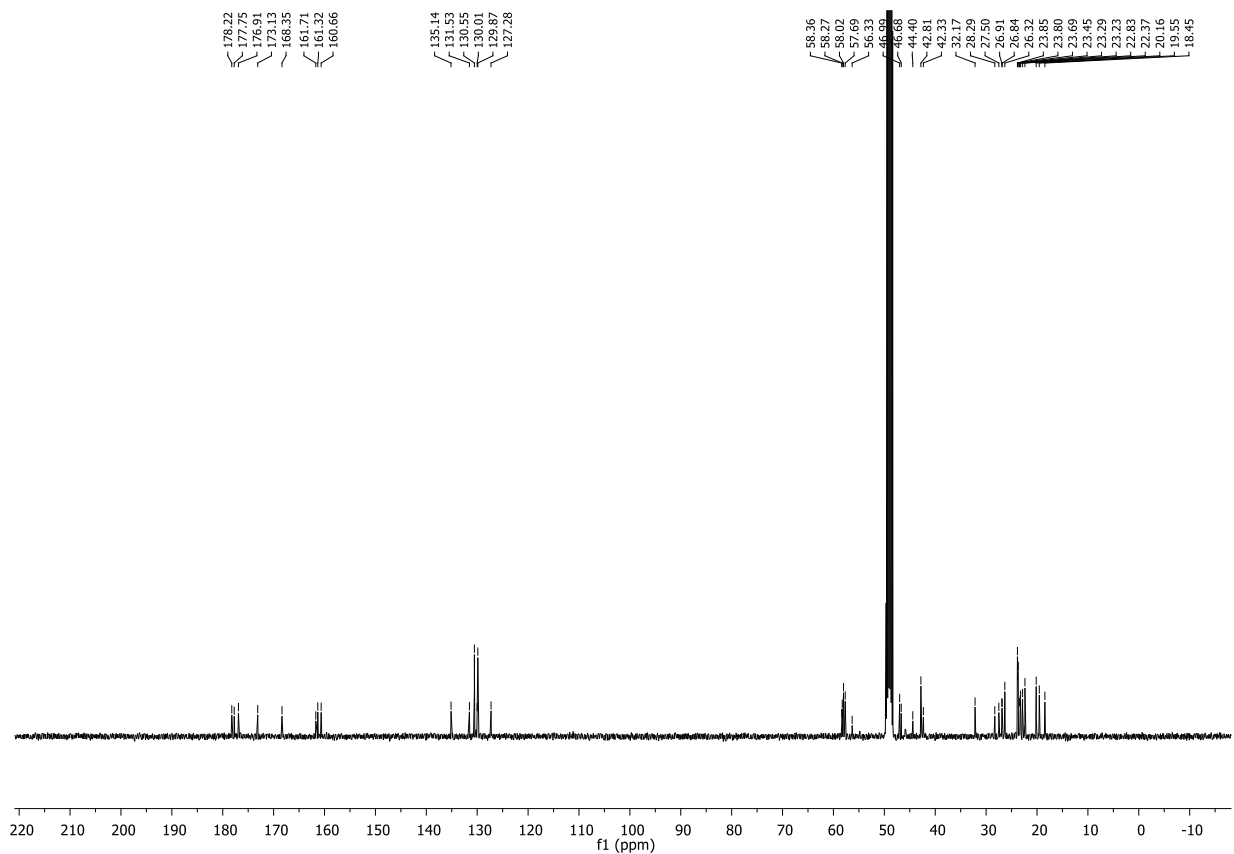

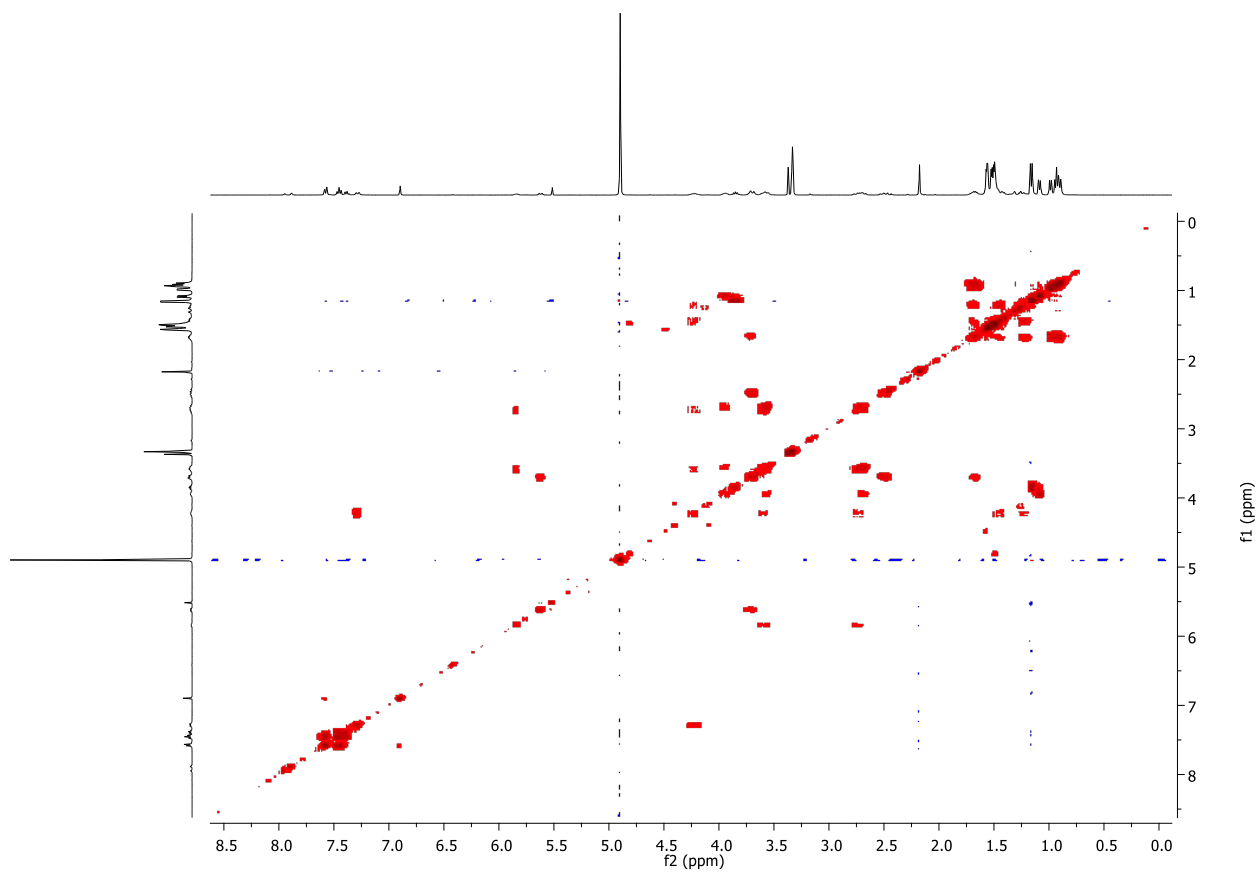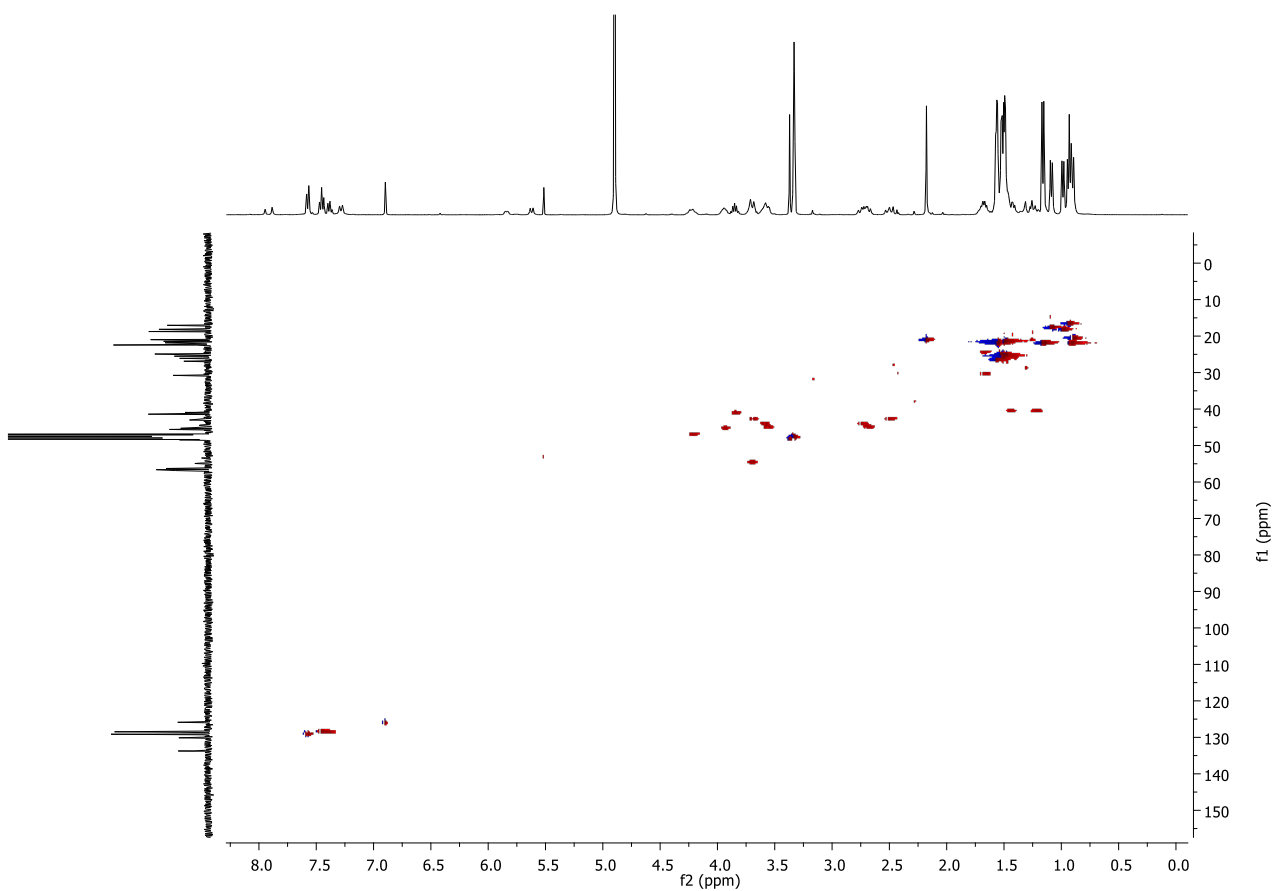

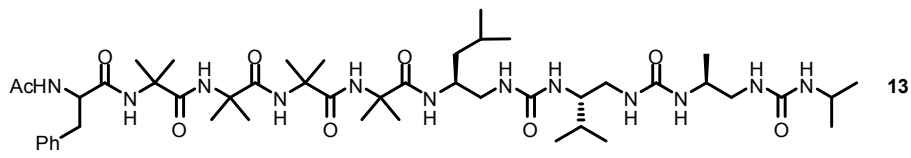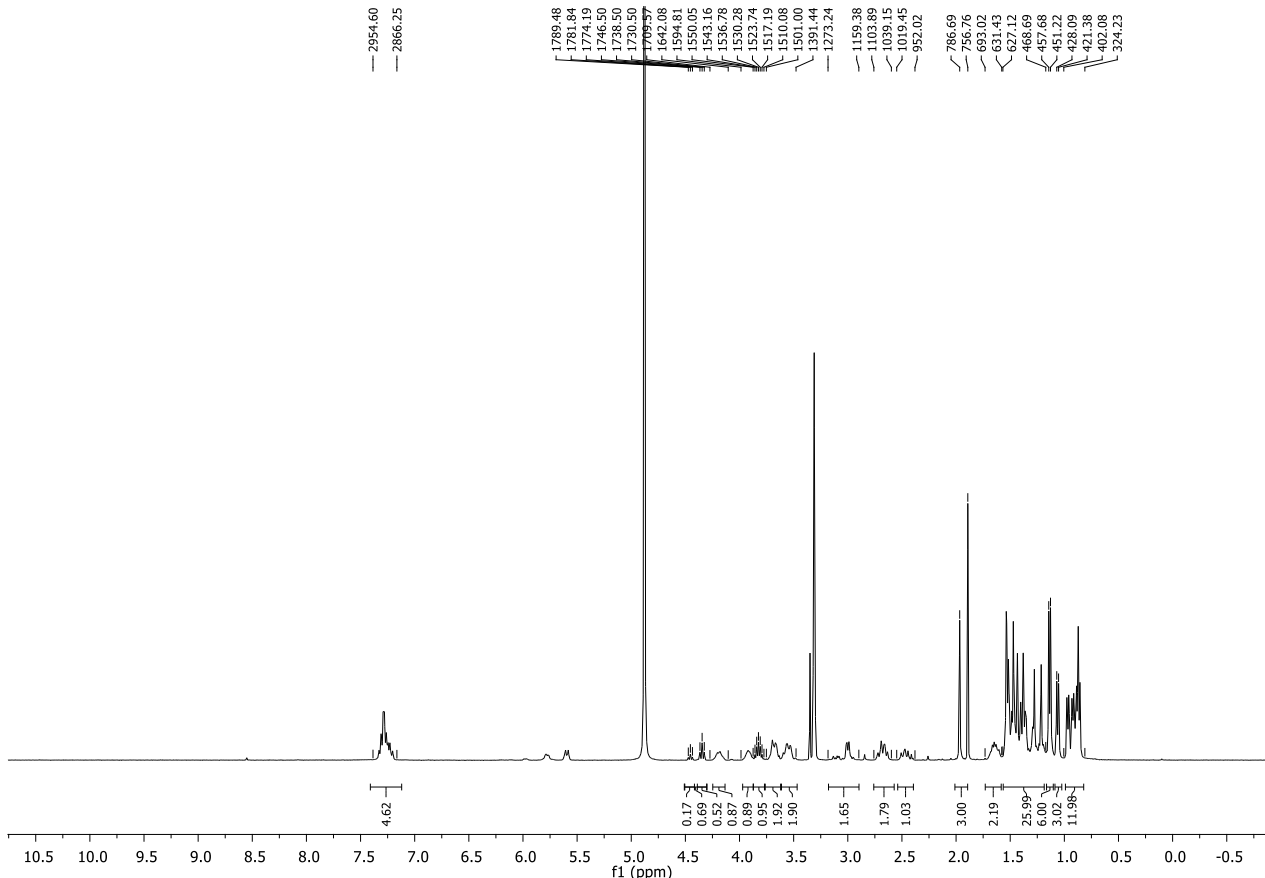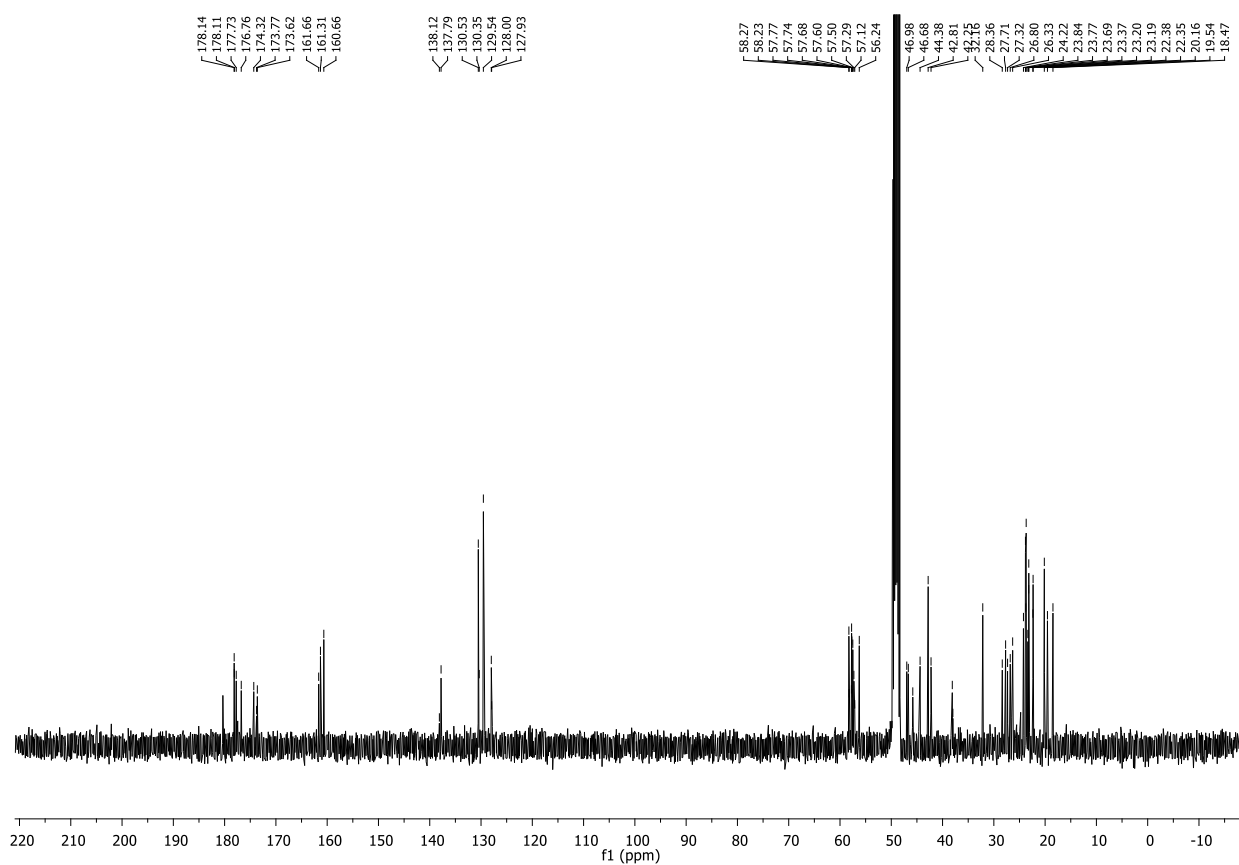

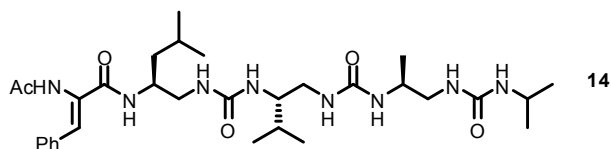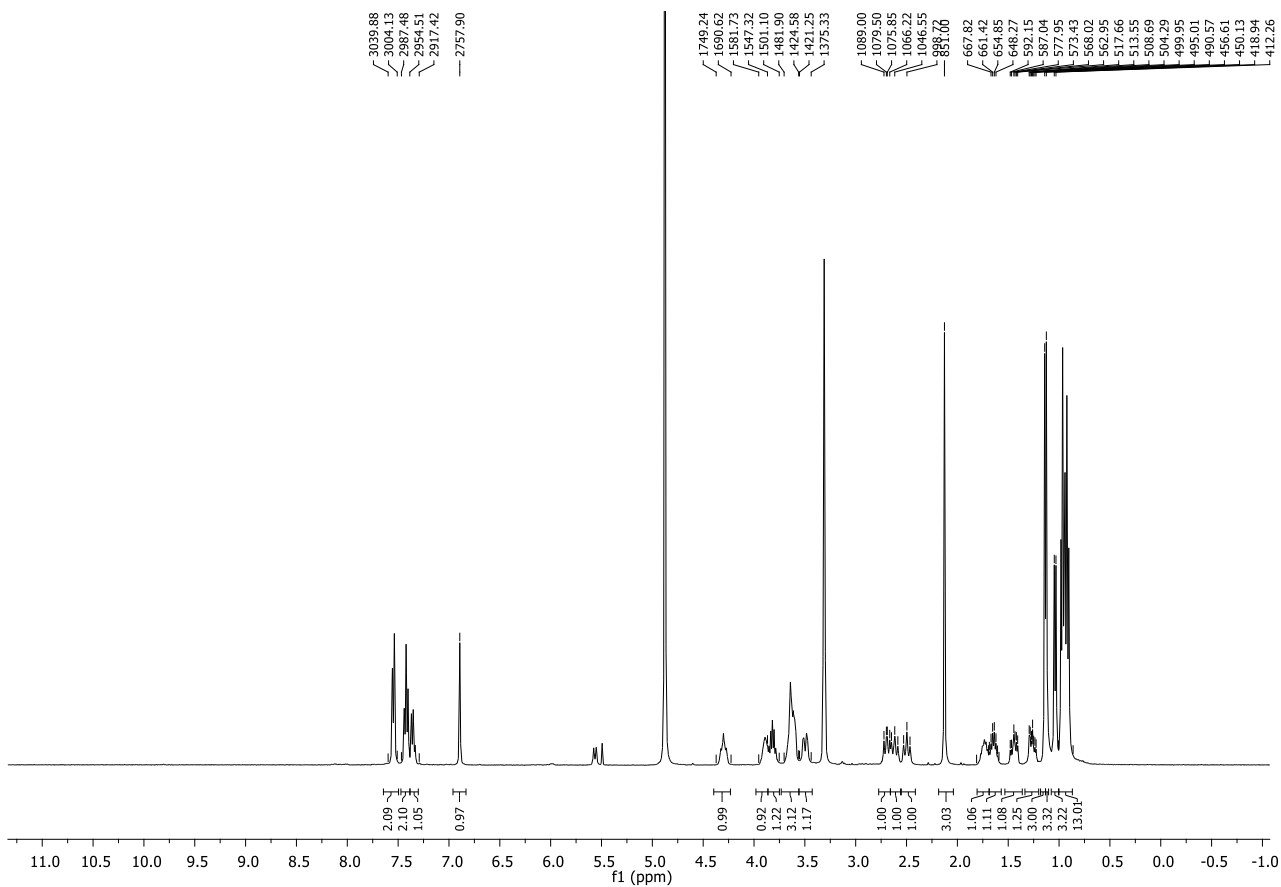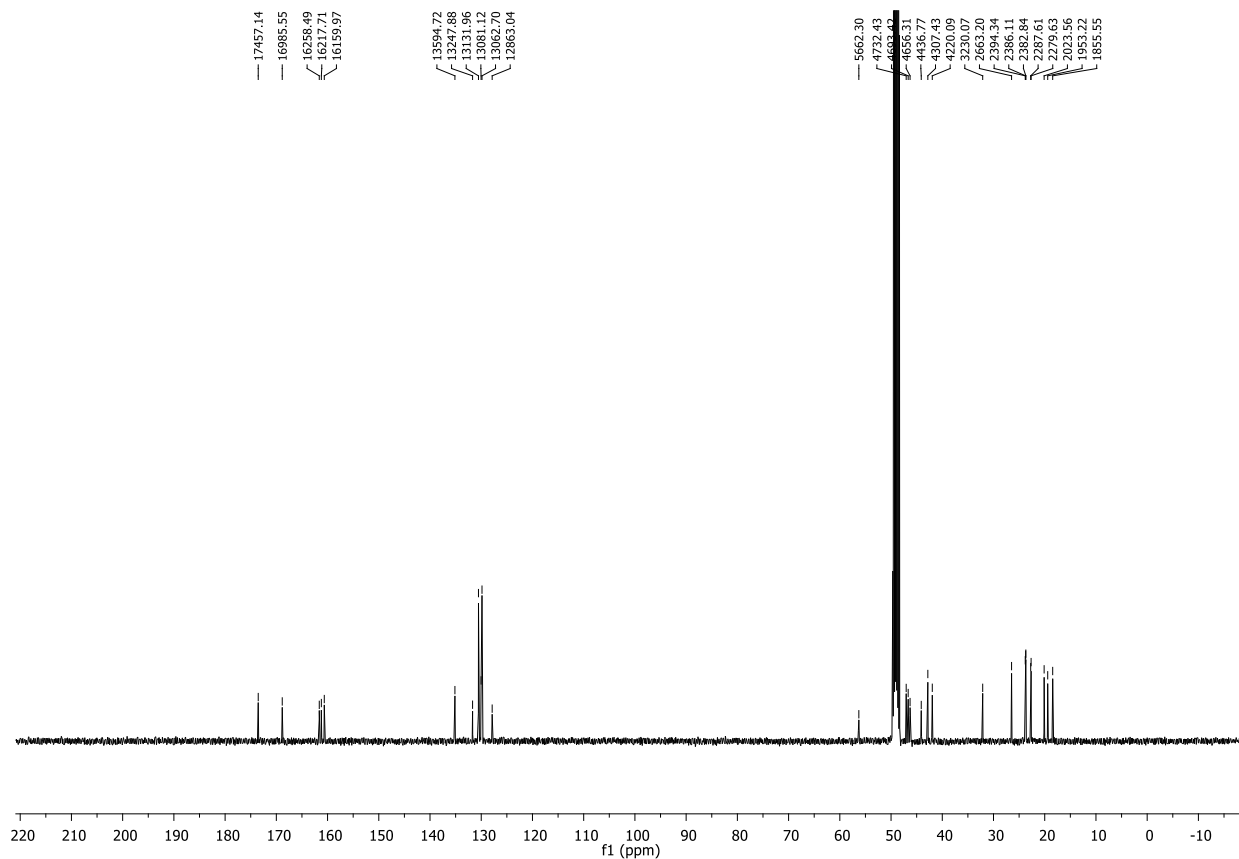

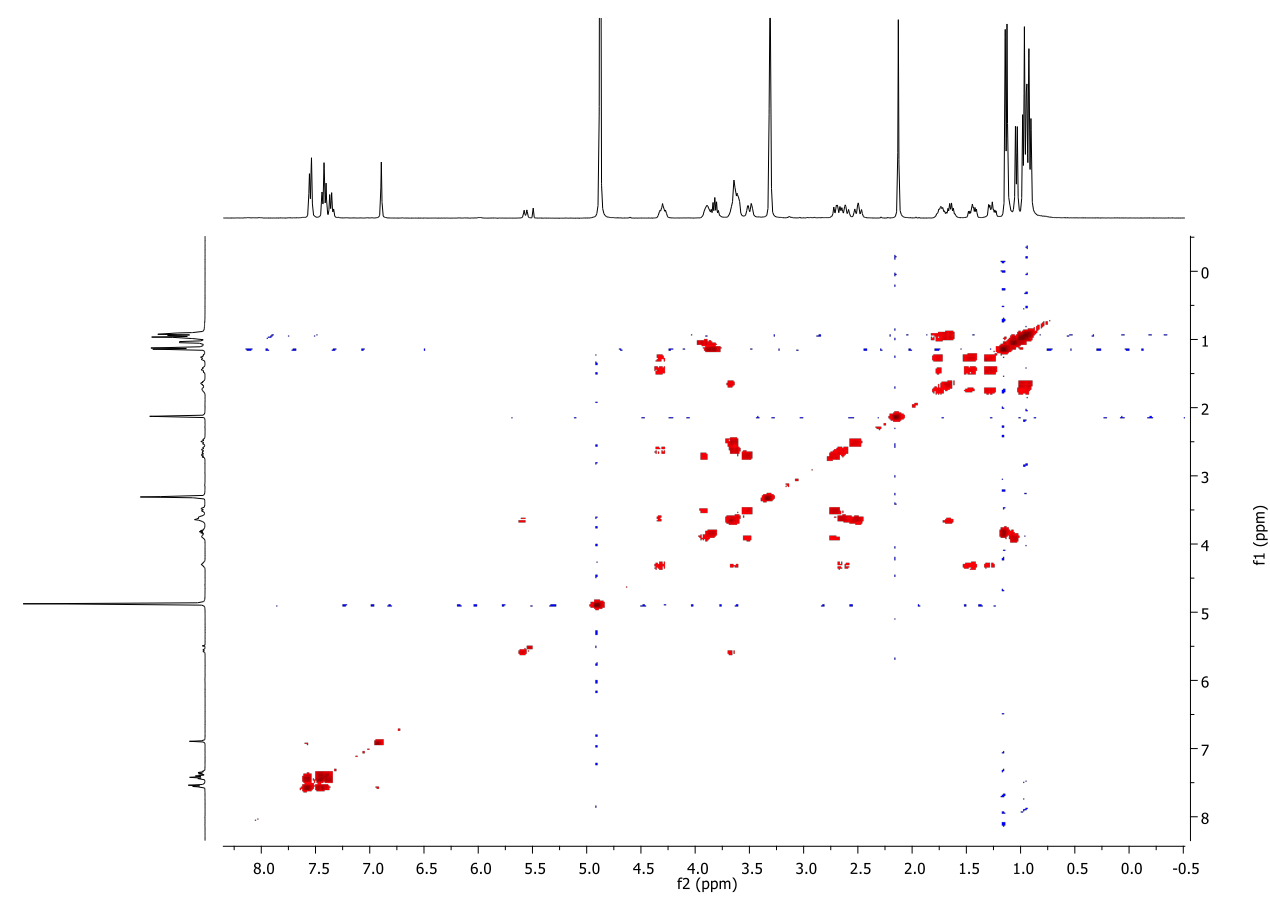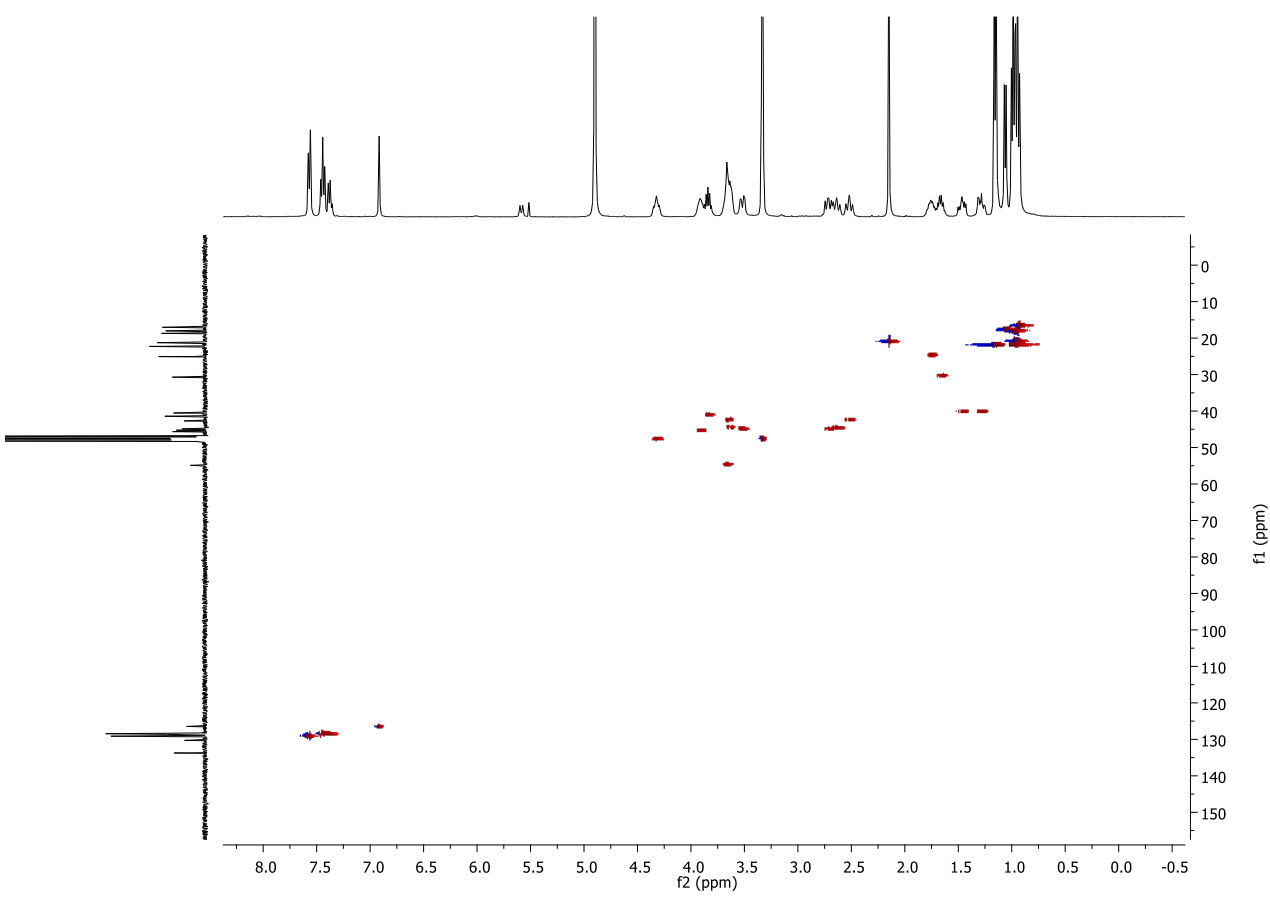

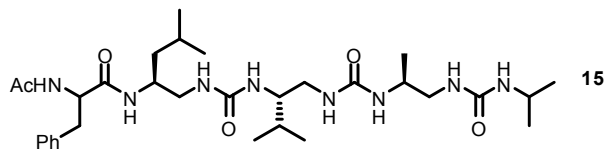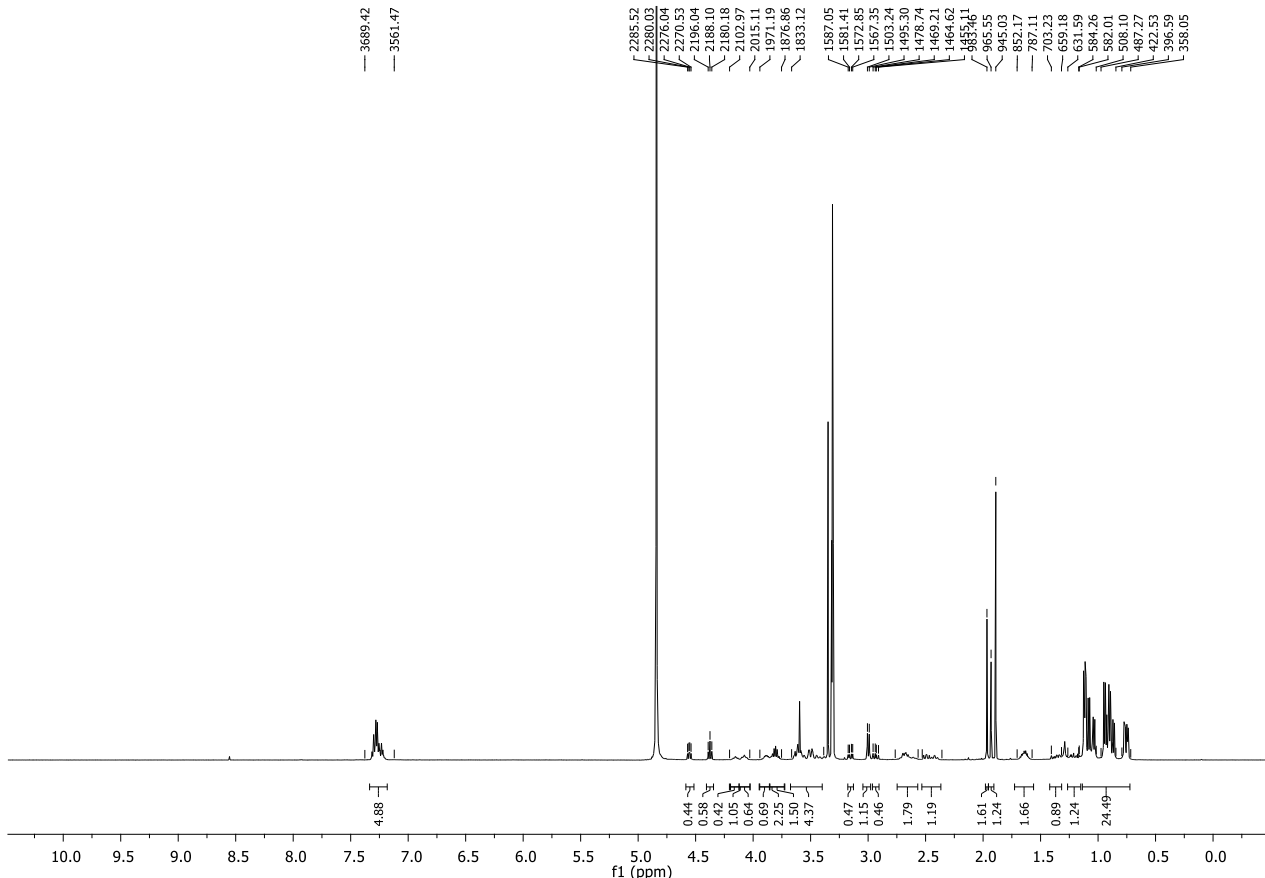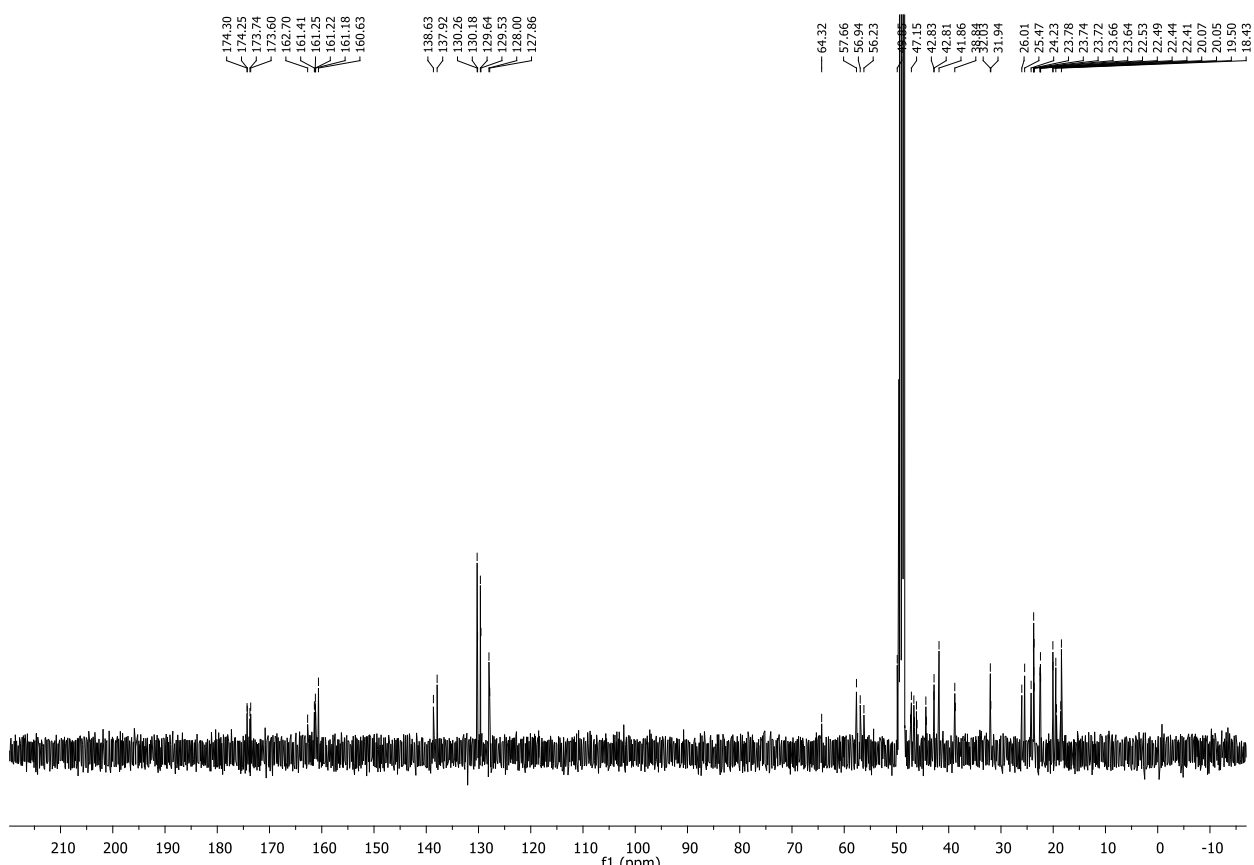

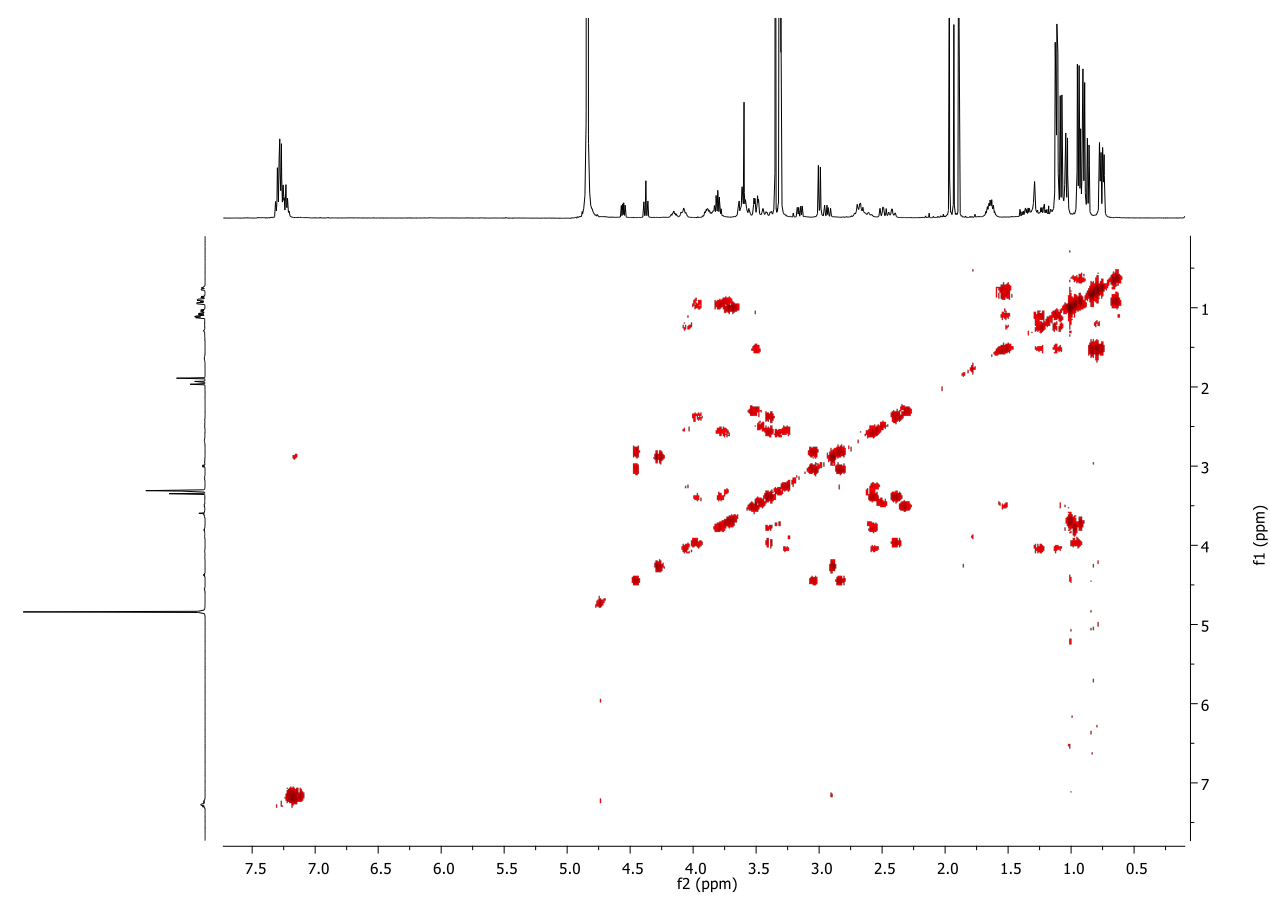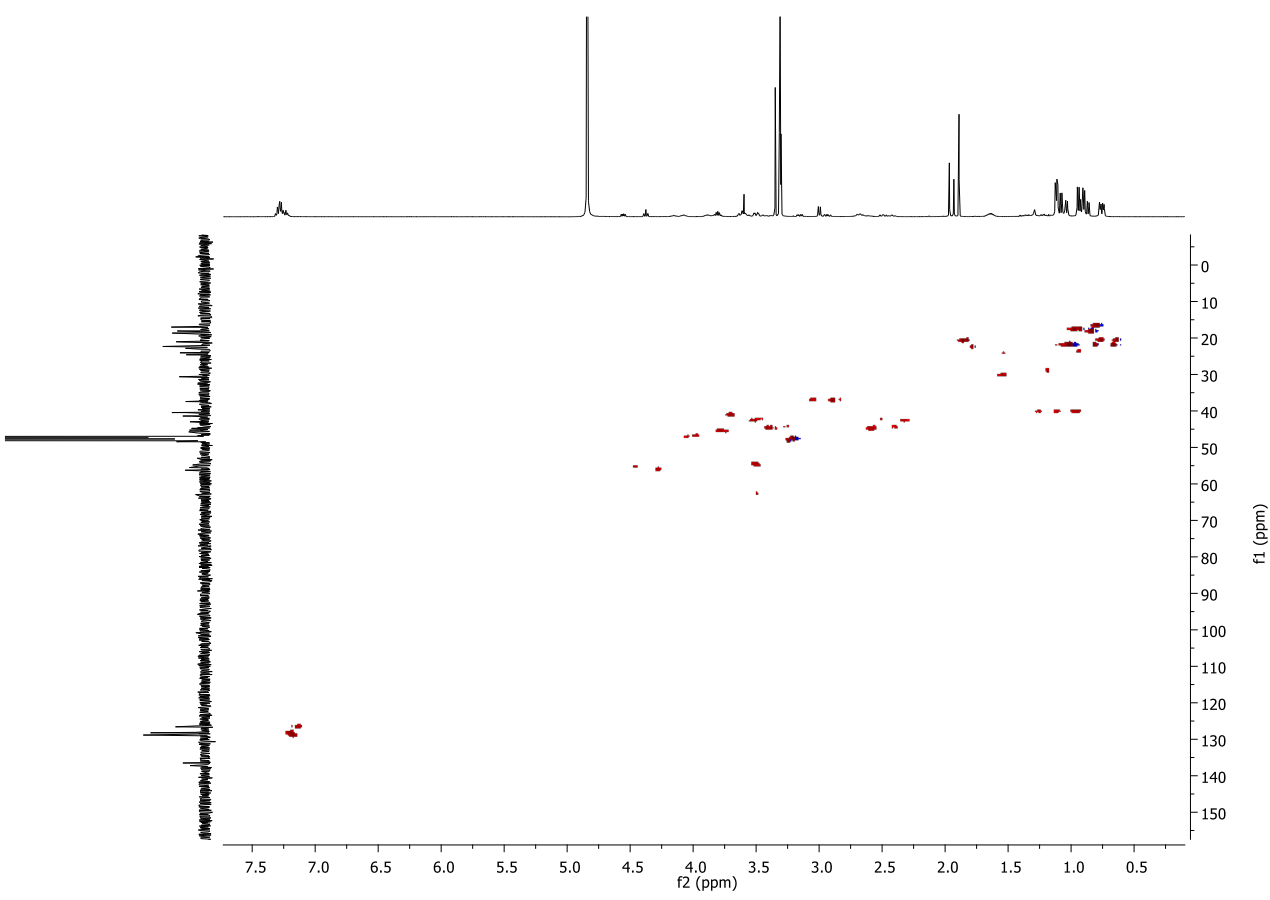

Supplement: c5cc02995c1.pdf [file c5cc02995c1.pdf]
